# Supplementary material for: Road traffic casualties in Great Britain at daylight savings time transitions: a causal regression discontinuity design analysis
Source: PubMed Central journal article supplement — BMJ Open. 2022 Apr 25;12(4):e054678. doi: 10.1136/bmjopen-2021-054678 (PMC9039378; doi:10.1136/bmjopen-2021-054678), 2022-04-25
Supplement: bmjopen-2021-054678.draft_revisions.pdf [file bmjopen-2021-054678.draft_revisions.pdf]

# BMJ Open

BMJ Open is committed to open peer review. As part of this commitment we make the peer review history of every article we publish publicly available.

When an article is published we post the peer reviewers' comments and the authors' responses online. We also post the versions of the paper that were used during peer review. These are the versions that the peer review comments apply to.

The versions of the paper that follow are the versions that were submitted during the peer review process. They are not the versions of record or the final published versions. They should not be cited or distributed as the published version of this manuscript.

BMJ Open is an open access journal and the full, final, typeset and author-corrected version of record of the manuscript is available on our site with no access controls, subscription charges or pay-per-view fees (<http://bmjopen.bmj.com>).

If you have any questions on BMJ Open's open peer review process please email [info.bmjopen@bmj.com](mailto:info.bmjopen@bmj.com)

# BMJ Open

## A causal analysis of daylight savings and road casualties in Great Britain

|                               |                                                                                                                            |
|-------------------------------|----------------------------------------------------------------------------------------------------------------------------|
| Journal:                      | <i>BMJ Open</i>                                                                                                            |
| Manuscript ID                 | bmjopen-2021-054678                                                                                                        |
| Article Type:                 | Original research                                                                                                          |
| Date Submitted by the Author: | 29-Jun-2021                                                                                                                |
| Complete List of Authors:     | Singh, Ramandeep; Imperial College London, Sood, Rohan; Imperial College London<br>Graham, Daniel; Imperial College London |
| Keywords:                     | PUBLIC HEALTH, STATISTICS & RESEARCH METHODS, SLEEP MEDICINE                                                               |
|                               |                                                                                                                            |

SCHOLARONE™  
Manuscripts

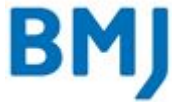

I, the Submitting Author has the right to grant and does grant on behalf of all authors of the Work (as defined in the below author licence), an exclusive licence and/or a non-exclusive licence for contributions from authors who are: i) UK Crown employees; ii) where BMJ has agreed a CC-BY licence shall apply, and/or iii) in accordance with the terms applicable for US Federal Government officers or employees acting as part of their official duties; on a worldwide, perpetual, irrevocable, royalty-free basis to BMJ Publishing Group Ltd ("BMJ") its licensees and where the relevant Journal is co-owned by BMJ to the co-owners of the Journal, to publish the Work in this journal and any other BMJ products and to exploit all rights, as set out in our [licence](#).

The Submitting Author accepts and understands that any supply made under these terms is made by BMJ to the Submitting Author unless you are acting as an employee on behalf of your employer or a postgraduate student of an affiliated institution which is paying any applicable article publishing charge ("APC") for Open Access articles. Where the Submitting Author wishes to make the Work available on an Open Access basis (and intends to pay the relevant APC), the terms of reuse of such Open Access shall be governed by a Creative Commons licence – details of these licences and which [Creative Commons](#) licence will apply to this Work are set out in our licence referred to above.

Other than as permitted in any relevant BMJ Author's Self Archiving Policies, I confirm this Work has not been accepted for publication elsewhere, is not being considered for publication elsewhere and does not duplicate material already published. I confirm all authors consent to publication of this Work and authorise the granting of this licence.

# A causal analysis of daylight savings and road casualties in Great Britain

Ramandeep Singh, Rohan Sood, Daniel J Graham<sup>1</sup>

*Transport Strategy Centre, Department of Civil and Environmental Engineering, Imperial College London  
Exhibition Road, London SW7 2AZ, United Kingdom*

---

## Abstract

**Objectives:** To determine whether daylight savings time (DST) transitions in the Spring and Autumn have a causal effect on road traffic casualties in Great Britain. We undertake aggregate and disaggregate spatial and temporal analyses to test the commonly referenced sleep and light hypotheses.

**Design:** The study takes the form of a natural experiment in which the DST transitions are interventions to be evaluated. Two outcomes are tested: (i) the total number of casualties of all severities (ii) the number of fatalities.

**Data:** Data are obtained from the UK Department for Transport STATS19 database. Over a period of 14 years between 2005 and 2018, 311,766 casualties of all severities and 5,429 fatalities occurred 3 weeks either side of the Spring DST transition and 367,291 casualties of all severities and 6,650 fatalities occurred 3 weeks either side of the Autumn DST transition.

**Primary outcome measure:** A regression discontinuity design method (RDD) is applied. The presence of a causal effect is determined via the degree of statistical significance and magnitude of the average treatment effect.

**Results:** DST transitions have had only a minor positive impact on road casualties and fatalities. The majority of significant average treatment effects are negative (70 out of 72 models), indicating that there tends to be fewer casualties following the transitions. Overall, we estimate that there are 0.25-0.36 fewer fatalities and 3.3-3.9 fewer total casualties on average per year at both the Spring and Autumn DST transitions combined.

**Conclusions:** The results indicate minor reductions in the number of fatalities following the DST transitions, and thus our analysis does not support the most recent UK parliamentary estimate that there would be 30 fewer fatalities in Great Britain if DST were to be abolished. Furthermore, the results do not provide conclusive support for either the sleep or light hypotheses.

*Keywords:* Road safety, Daylight savings time, Sleep, Visibility, Regression discontinuity design

---

---

<sup>1</sup> Corresponding author

*Email address:* d.j.graham@imperial.ac.uk (Daniel J Graham)

### *Strengths and limitations of this study*

#### Strengths:

- We adopt a causal regression discontinuity design method to generate robust estimates of the impact of DST transitions on road traffic casualties and fatalities in Great Britain.
- We undertake both aggregate and disaggregate spatial and temporal analyses to investigate the impacts of sleep and light disruptions at the transitions.
- We account for potential confounding through the inclusion of seasonal variables at the level of year, day of week, and time of day, and treat heteroskedasticity and autocorrelation to account for unobserved confounders.

#### Limitations:

- Limitations include potential under-reporting of casualties in the Department for Transport STATS19 database, sparse data leading to estimation difficulties in the northernmost regions of Scotland, and the presence of potential additional unobserved confounders that could lead to biased estimates.

## 1. Introduction

Since its introduction, the implementation of daylight savings time (DST) has been a contentious issue which has regained attention in recent times. In response to a public consultation held in 2018, the European Parliament in 2019 adopted a position to support the elimination of daylight savings in the European Union (EU), with plans for implementation in 2021 [1, 2]. The United Kingdom (UK) initiated an inquiry to analyse the impact of the EU change to “understand what factors should inform [the UK’s] approach” [3]. The UK also previously debated and ultimately rejected changes to daylight savings in the Daylight Saving Bill 2010-11, which proposed to shift UK time forward by one hour throughout the year to align with Central European Time (CET) [4]. A key argument in the elimination or alteration of daylight savings time is the impact that clock changes have on road safety. In both the academic literature and government parliamentary debates, two issues are highlighted as having an impact on road safety levels: (i) changes in daylight hours could impact alertness due to the required chronobiologic adjustments to the human circadian rhythm [1, 5, 6] - herein referred to as the ‘sleep hypothesis’, and (ii) changing of daylight hours could result in detrimental changes to visibility [7, 8, 4, 3] - herein referred to as the ‘light hypothesis’.

Evidence on the impact of DST transitions on road traffic casualties is currently inconclusive. In the 2010-2011 Daylight Saving Bill, it was argued that there would be 80 fewer fatalities on UK roads if the UK switched to CET [4]. In the more recent UK report on the proposed EU changes, it was stated that abolishing time changes and adopting a permanent move to UK Summer Time could result in 30 fewer fatalities [3]. However, it is unclear how these figures were generated and whether robust causal statistical analysis methods were adopted. In the academic literature, there is mixed consensus regarding the impact of DST transitions. Increases in road casualties are reported for studies undertaken in the US by Smith [9] and in New Zealand by Robb and Barnes [10], while reductions in casualties in the US are reported by Coate and Markowitz [11] and Crawley [12]. Lindenberger et al. [13] reports no significant impacts in their analysis of accidents in Germany.

1  
2  
3  
4  
5  
6  
7 The aim of this paper is to estimate the causal effect of DST transitions on the number of  
8 road traffic casualties and fatalities in Great Britain. This paper contributes to the literature from  
9 several perspectives. First, the majority of studies adopt non-casual techniques to quantify the  
10 impact of DST transitions, including comparisons of descriptive statistics, linear regression  
11 based on ordinary least squares, and quasi-Poisson regression [13, 10, 11, 14, 15]. Two studies  
12 by Carey and Sarma [7] and Uttley and Fotios [16] adopt a casual regression discontinuity  
13 design (RDD) method similar to ours, however, the studies focus on road casualties in the USA  
14 and pedestrian casualties in the UK, respectively. We therefore contribute to the literature by  
15 adopting a casual RDD method to analyse road traffic accidents in Great Britain, which, to our  
16 knowledge, has not been previously undertaken. Second, use of the RDD method with time as  
17 the forcing variable requires stringent specification tests to be undertaken to ensure that the  
18 models are free from potential confounding factors that can lead to biased estimates. In the  
19 literature on RDD methods applied to DST analyses, these specification tests are not typically  
20 performed. In our analysis, we follow the recommendations made in Hausman and Rapson [17]  
21 to test for model robustness. Finally, evidence for the sleep and light hypotheses is limited, with  
22 only two known non-casual studies in the UK and US indicating an increase in casualties during  
23 darker periods at DST transitions [14, 15]. Therefore, in addition to a pooled analysis of Great  
24 Britain as a whole, we also undertake disaggregate spatial and temporal analyses to test the sleep  
25 and light hypotheses.  
26  
27  
28

## 29 **2. Methods**

### 30 *2.1. Patient and public involvement statement*

31  
32 Please note that no patients nor members of the public were involved in this study.  
33

### 34 *2.2. Study area and data*

35  
36 The STATS19 database produced by the Department for Transport is used to obtain records of  
37 road traffic accidents that resulted in personal injury in Great Britain between 2005 and 2018  
38 [18]. Casualties are defined as personal injuries of any severity as a result of an accident. As  
39 specified in [19], a single accident can be associated with more than one casualty. In this  
40 analysis, we focus on total casualties (all severities combined) and fatal casualties.  
41  
42

43  
44 Three week windows on either side of the DST transitions in Spring and Autumn are  
45 extracted from the total accident data set. Three weeks is chosen to provide enough data for the  
46 optimised local bandwidth to be calculated during the RDD modelling. Through data cleaning,  
47 less than 0.02% of records have been removed as a result of missing observations, as well as  
48 records over Bank Holidays. The descriptive statistics of the casualties for all of Great Britain  
49 over the three week windows either side of the transitions are summarised in Table 1. As shown  
50 in the table, there are increases in the number of casualties and fatalities after both transitions  
51 when considering 3 week windows before and after the transitions.  
52  
53  
54  
55  
56  
57  
58  
59  
60

Table 1: Descriptive statistics of casualties, aggregated over Great Britain over  $\pm 3$  week windows from DST transition dates

| Casualty severity | Spring     |           | Autumn     |           |
|-------------------|------------|-----------|------------|-----------|
|                   | Before DST | After DST | Before DST | After DST |
| Total casualties  | 153107     | 158659    | 175796     | 191495    |
| Fatal casualties  | 2517       | 2912      | 3211       | 3439      |

To investigate whether the DST transitions have different regional effects across Great Britain, National Ordnance Survey data are used to divide Great Britain into distinct bands based on latitude and longitude [20]. Using the Ordnance Survey Grid Reference (OSGR) variable within STATS19, each accident and casualty is assigned a Northings band and an Eastings band.

### 2.3. Regression discontinuity design framework

DST is a policy enacted for the entire population of Great Britain and the treatment assignment is deterministic, i.e., there is no ambiguity in treated vs untreated observations. Therefore, the DST treatment imposed at the Spring and Autumn transitions is considered as a sharp discontinuity. Further information on RDD frameworks is presented in Imbens and Lemieux [21] and Lee and Lemieux [22].

In this analysis, we use spatio-temporal units where  $i$  refers to a given local area zone within Great Britain,  $t$  refers to a given time period, where each day is segmented into 5 time periods, and  $z$  refers to year. The assignment of the treatment, i.e. the imposition of the daylight savings transition, is solely dependent on the value of the forcing variable, time  $T$ , as follows:

$$W_{itz} = \begin{cases} 1 & \text{if } T_t \geq c \\ 0 & \text{if } T_t < c \end{cases} \quad (1)$$

where  $c$  is the treatment threshold, which is defined as the DST transition date, and  $W_{itz}$  is the binary treatment in the sharp RDD. In the Spring transition, the treatment is the imposition of Summer Time, while in the Autumn transition, the treatment is the return to GMT. Observations recorded between 00:00 and 01:00 in March and between 00:00 and 02:00 in October on the day of the transition are designated as non-treated in line with when the transition occurs. Over the analysis time period of 2005 to 2018, the transition dates for Spring range from 25 to 31 March and those for Autumn range from 25 to 31 October.

The observation of a discontinuity in the average treatment effect either side of the treatment threshold is evidence of a causal effect of the treatment [21, 22]. The average treatment effect for a sharp discontinuity  $\tau_{SRD}$  in time is defined as:

$$\tau_{SRD} = E[Y_{itz}(1) - Y_{itz}(0) | T_t = c] = \lim_{t \downarrow c} E[Y_{itz} | T_t = t] - \lim_{t \uparrow c} E[Y_{itz} | T_t = t] \quad (2)$$

where  $Y_{itz}(1)$  indicates the potential outcome when treatment is received and  $Y_{itz}(0)$  indicates the potential outcome when treatment is not received. The second equality holds

assuming continuity of expectations in  $T$  i.e.  $E[Y_{itz}(0) | T_t = c] = \lim_{t \uparrow c} E[Y_{itz}(0) | T_t = t] = \lim_{t \uparrow c} E[Y_{itz} | T_t = t]$  [21].

Since the forcing variable is time, we follow the recommendations in Hausman and Rapson [17] to address potential specification issues. To ensure that there are enough observations in the vicinity of the treatment threshold, we segment daily data into 5 time periods, and the data are aggregated at a local area zone level which also provides cross-sectional variance at each time point. By segmenting the data to increase the number of observations close to the treatment threshold, we avoid the need to include observations further away from the threshold which can introduce bias from unobserved confounding variables. We account for potential bias from known confounding variables correlated with time through the inclusion of covariates representing potential seasonal variation in casualties. The covariates are year, day of the week, and the time period associated with each observation. Since the daylight savings transitions are universally applied at fixed transition dates, we do not anticipate issues arising from manipulation of treatment status. Further specification tests are undertaken to ensure validity of the design and these are discussed in section 2.4.

The data sets are arranged in a pseudo-panel form with indexes of local area zone and time period per year. The response variable is the sum of the number of casualties per local area zone and time period per year; in cases where no casualties are observed, a value of 0 is designated. For each of the Spring and Autumn transitions, two base regressions are undertaken as follows: (i) the total number of casualties of all severities, and (ii) the total number of fatalities. The two base regressions are run for three scenarios: (i) for Great Britain overall, (ii) for each Northing band in each time period, and (iii) for each Easting band in each time period. The general equation for the aggregate model of Great Britain is given in equation 3. The regional and time of day analyses enable the investigation of the sleep and light hypotheses. It should be noted that in the disaggregate models, the time of day covariate in equation 3 is not included as the models are pre-segmented by time of day. All modelling has been undertaken using R statistical analysis software.

$$Y_{itz} = \alpha + \tau_{SRD}W_{itz} + \theta_1 K_{itz}(t) + \theta_2 K_{itz,post}(t) + \beta_1 X_{1z} + \beta_2 X_{2t} + \beta_3 X_{3t} + \varepsilon_{itz} \quad (3)$$

where  $Y_{itz}$  is the total number of casualties per local area zone  $i$  per time period  $t$  per year  $z$ ,  $W_{itz}$  is the treatment assignment indicator as previously defined,  $\tau_{SRD}$  is the average treatment effect of interest,  $K_{itz}(t)$  represents the average long term trend across the entire bandwidth i.e.  $K_{itz}(t) = t$ , and  $K_{itz,post}(t)$  is the time trend after the intervention where  $K_{itz,post}(t) = 0$ ,  $t < c$  and  $K_{itz,post}(t) = t - c + 1$ ,  $t \geq c$ . The categorical variables  $X_{1z}$ ,  $X_{2t}$ ,  $X_{3t}$  condition for year, day of the week, and time period, respectively. Year takes a value from 1 – 14 corresponding to the years 2005 – 2018. As coded in the STATS19 database, the day of the week takes a value 1 – 7 with 1 corresponding to Sunday and 7 corresponding to Saturday. The time of the day takes values as follows: Twilight = 1, AM Peak = 2, Inter Peak = 3, PM Peak = 4, Night = 5. The peak time periods follow the standards adopted by the Department for Transport: AM Peak (07:00 – 09:59), Inter Peak (10:00 – 15:59) and PM Peak (16:00 – 18:59) [18]. Two additional time-bins are added to complete a 24-hour period: Twilight (0:00 – 06:59) and Night (19:00 – 23:59).  $\alpha$  and  $\varepsilon_{itz}$  are the model constant and model random error term, respectively, where  $\varepsilon_{itz} \sim \mathcal{N}(0, \sigma_\varepsilon^2)$ .



It should be noted that the inclusion of group-specific fixed effects for local area zone was trialled to account for potential time-invariant cross-sectional differences. However, using the Bayesian Information Criterion (BIC) as an indicator of model performance, we found that a majority of models performed better with no local area zone effects compared to those with local area effects, and so these effects are not included in the final model form.

#### 2.4. Specification tests

As recommended by Hausman and Rapson [17], we perform the following specification tests:

- The optimal bandwidth for the RDD models is first calculated using a data-driven optimal bandwidth selection process via the ‘rdrobust’ package in the R statistical analysis software [23, 24]. We adopt a local linear specification for the forcing variable of time. Specification checks are performed by varying the bandwidth within the vicinity of the optimal bandwidth, and verifying that the average treatment effect remains consistent.
- Specification checks are performed for the polynomial order of the forcing variable of time, and the BIC is used to judge model performance. Polynomials of up to degree 4 are tested, and we verify that the local linear specification performs best in line with the bandwidth selection procedure.
- The Bruesch-Godfrey test [25, 26] is performed to test for autocorrelation of the error term for a lag value up to 10 (2 days). If autocorrelation is present, it is treated using Newey-West standard errors [27], which are heteroskedasticity and autocorrelation consistent (HAC).
- The Bruesch-Pagan test [28] is performed to test for heteroskedasticity. If heteroskedasticity is present with no error term autocorrelation, it is treated with heteroskedasticity consistent (HC3) errors [29].

Note: Autoregression of the dependent variable is not considered in this analysis, since the majority of casualties per local area zone do not occur in consecutive time periods.

### 3. Results

The results for the aggregate Spring and Autumn RDD models are presented in Table 2. The results for the disaggregate spatial and temporal RDD analyses are presented in Tables 3 and 4. All results tables summarise cases where the RDD models have passed all specification tests as described in section 2.4, and the average treatment effect at the DST transition is significant at a minimum significance level of  $\alpha = 0.1$  ( $\geq 90\%$ ). A map of the corresponding Northing and Eastings bands is given in Figure 1.

Table 2: Aggregate models of Great Britain - RDD results summary

| Transition | Location | Casualty type | BW | $n$ | $\tau_{SRD}$ | % Change |
|------------|----------|---------------|----|-----|--------------|----------|
|------------|----------|---------------|----|-----|--------------|----------|

|        |                         |                |    |        |                   |        |
|--------|-------------------------|----------------|----|--------|-------------------|--------|
| Spring | Aggregate Great Britain | All casualties | 32 | 173888 | -0.075 (0.009)*** | 0.003% |
|--------|-------------------------|----------------|----|--------|-------------------|--------|

Notes: Significance notation: p-values 0 '\*\*\*' 0.001 '\*\*' 0.01 '\*' 0.05 '.' 0.1 ' ' 1. Standard errors in parentheses.

BW refers to bandwidth in time period units,  $\tau_{SRD}$  refers to the sharp RDD average treatment effect due to DST transition.

For peer review only

Table 3: Spring transition - disaggregate spatial and temporal models RDD results summary

| Location      | Band        | Time period | All Casualties |                   |                   |          | Fatalities |             |                  |                  |          |
|---------------|-------------|-------------|----------------|-------------------|-------------------|----------|------------|-------------|------------------|------------------|----------|
|               |             |             | BW             | n                 | $\tau_{SRD}$      | % Change | BW         | Time period | n                | $\tau_{SRD}$     | % Change |
| Aggregate     |             | 1           | 22             | 27145             | -0.110 (0.024)*** | -0.12%   | 40         | 1           | 12744            | -0.067 (0.022)** | -0.70%   |
|               |             | 3           | 62             | 65208             | -0.157 (0.033)*** | -0.01%   |            |             |                  |                  |          |
|               |             | 4           | 38             | 43472             | -0.059 (0.020)**  | -0.01%   |            |             |                  |                  |          |
|               |             | 5           | 46             | 48906             | -0.130 (0.025)*** | -0.03%   |            |             |                  |                  |          |
| Northing band | 1,000-2,000 | 1           | 28             | 9925              | -0.095 (0.034)**  | -0.28%   |            |             |                  |                  |          |
|               |             | 3           | 36             | 15992             | -0.162 (0.042)*** | -0.06%   |            |             |                  |                  |          |
|               |             | 4           | 38             | 16008             | -0.067 (0.029)*   | -0.04%   |            |             |                  |                  |          |
|               |             | 5           | 48             | 17991             | -0.146 (0.041)*** | -0.08%   |            |             |                  |                  |          |
|               | 2,000-3,000 | 1           | 36             | 9758              | -0.117 (0.069) .  | -0.45%   | 50         | 1           | 3312             | -0.134 (0.072) . | -3.07%   |
|               |             | 3           | 74             | 19698             | -0.137 (0.047)**  | -0.06%   |            |             |                  |                  |          |
|               | 3,000-4,000 | 1           | 34             | 8365              | -0.075 (0.035)*   | -0.33%   | 44         | 1           | 2648             | -0.046 (0.021)*  | -2.58%   |
|               |             | 3           | 64             | 14496             | -0.167 (0.063)**  | -0.07%   |            |             |                  |                  |          |
|               |             | 5           | 52             | 13233             | -0.086 (0.042)*   | -0.09%   |            |             |                  |                  |          |
|               | 4,000-5,000 |             |                |                   |                   | 54       | 1          | 1414        | -0.049 (0.028) . | -4.89%           |          |
| 5,000-6,000   | 3           | 42          | 2872           | -0.209 (0.118) .  | -0.53%            |          |            |             |                  |                  |          |
| 6,000-7,000   | 1           | 34          | 2135           | -0.154 (0.082) .  | -3.31%            |          |            |             |                  |                  |          |
| Easting band  | 2,000-3,000 | 3           | 72             | 8974              | -0.108 (0.063) .  | -0.10%   |            |             |                  |                  |          |
|               |             | 5           | 52             | 7029              | -0.099 (0.051) .  | -0.24%   |            |             |                  |                  |          |
|               | 3,000-4,000 | 1           | 28             | 8370              | -0.148 (0.056)**  | -0.64%   | 62         | 1           | 4510             | -0.139 (0.055)*  | -2.89%   |
|               |             | 3           | 50             | 16930             | -0.090 (0.050) .  | -0.04%   | 56         | 3           | 6432             | 0.023 (0.013) .  | 0.59%    |
|               | 4,000-5,000 | 1           | 30             | 11814             | -0.069 (0.030)*   | -0.18%   |            |             |                  |                  |          |
|               |             | 3           | 74             | 28000             | -0.171 (0.049)*** | -0.04%   |            |             |                  |                  |          |
|               |             | 5           | 50             | 20000             | -0.083 (0.038)*   | -0.05%   |            |             |                  |                  |          |
|               | 5,000-6,000 | 1           | 28             | 8530              | -0.104 (0.039)**  | -0.34%   |            |             |                  |                  |          |
|               |             | 3           | 70             | 24066             | -0.090 (0.037)*   | -0.02%   |            |             |                  |                  |          |
|               |             | 4           | 26             | 8565              | -0.110 (0.045)*   | -0.10%   |            |             |                  |                  |          |
| 5             |             | 44          | 15453          | -0.149 (0.045)*** | -0.09%            |          |            |             |                  |                  |          |

Notes: Significance notation: p-values 0 '\*\*\*' 0.001 '\*\*' 0.01 '\*' 0.05 '.' 0.1 ' ' 1. Standard errors in parentheses. BW refers to bandwidth in time period units,  $\tau_{SRD}$  refers to the sharp RDD average treatment effect due to DST transition.

Table 4: Autumn transition - disaggregate spatial and temporal models RDD results summary

| Location      | Band        | Time period | All Casualties |                  |                   |          | Fatalities |             |       |                  |          |
|---------------|-------------|-------------|----------------|------------------|-------------------|----------|------------|-------------|-------|------------------|----------|
|               |             |             | BW             | n                | $\tau_{SRD}$      | % Change | BW         | Time period | n     | $\tau_{SRD}$     | % Change |
| Aggregate     |             | 1           | 18             | 16197            | -0.096 (0.019)*** | -0.13%   | 38         | 1           | 13671 | -0.030 (0.012)*  | -0.40%   |
|               |             | 2           | 22             | 21612            | -0.028 (0.016) .  | -0.02%   |            |             |       |                  |          |
|               |             | 3           | 72             | 75642            | -0.101 (0.028)*** | -0.01%   |            |             |       |                  |          |
|               |             | 4           | 34             | 37821            | -0.077 (0.024)**  | -0.01%   |            |             |       |                  |          |
|               |             | 5           | 32             | 37821            | -0.231 (0.030)*** | -0.04%   | 60         | 5           | 24936 | -0.035 (0.016)*  | -0.17%   |
| Northing band | 0-1,000     | 1           | 38             | 2534             | -0.153 (0.058)**  | -2.38%   |            |             |       |                  |          |
|               |             | 2           | 42             | 3104             | 0.058 (0.030) .   | 0.42%    |            |             |       |                  |          |
|               |             | 5           | 64             | 5044             | -0.156 (0.062)*   | -0.56%   |            |             |       |                  |          |
|               | 1,000-2,000 | 1           | 24             | 10015            | -0.158 (0.036)*** | -0.35%   | 40         | 1           | 4888  | -0.052 (0.017)** | -1.45%   |
|               |             | 4           | 30             | 12048            | -0.129 (0.036)*** | -0.09%   |            |             |       |                  |          |
|               |             |             |                |                  |                   |          | 64         | 5           | 7904  | -0.083 (0.043) . | -1.12%   |
|               | 2,000-3,000 | 1           | 32             | 9695             | -0.112 (0.035)**  | -0.39%   |            |             |       |                  |          |
|               |             | 5           | 48             | 12708            | -0.190 (0.058)**  | -0.17%   |            |             |       |                  |          |
|               |             |             |                |                  |                   |          |            |             |       |                  |          |
|               | 3,000-4,000 | 1           | 26             | 6010             | -0.152 (0.045)*** | -0.74%   |            |             |       |                  |          |
|               |             | 4           | 40             | 9576             | -0.118 (0.042)**  | -0.11%   |            |             |       |                  |          |
|               |             | 5           | 50             | 11950            | -0.247 (0.055)*** | -0.21%   |            |             |       |                  |          |
|               | 4,000-5,000 | 5           | 50             | 6850             | -0.315 (0.096)**  | -0.38%   |            |             |       |                  |          |
|               |             |             |                |                  |                   |          |            |             |       |                  |          |
|               | 5,000-6,000 | 2           | 48             | 3440             | -0.076 (0.031)*   | -0.41%   |            |             |       |                  |          |
|               |             |             |                |                  |                   |          |            |             |       |                  |          |
| 7,000-8,000   | 5           | 70          | 1470           | -0.094 (0.045)*  | -1.84%            |          |            |             |       |                  |          |
|               |             |             |                |                  |                   |          |            |             |       |                  |          |
| 8,000-9,000   | 1           | 56          | 583            | -0.280 (0.097)** | -11.53%           |          |            |             |       |                  |          |
|               | 5           | 66          | 793            | -0.362 (0.128)** | -5.69%            |          |            |             |       |                  |          |
| Easting band  | 1,000-2,000 | 1           | 64             | 1092             | -0.072 (0.036)*   | -3.34%   |            |             |       |                  |          |
|               |             |             |                |                  |                   |          |            |             |       |                  |          |
|               | 2,000-3,000 |             |                |                  |                   |          | 78         | 3           | 3210  | -0.056 (0.021)** | -3.00%   |
|               |             | 4           | 54             | 7018             | -0.091 (0.043)*   | -0.15%   |            |             |       |                  |          |
|               |             | 5           | 50             | 6280             | -0.268 (0.076)*** | -0.55%   |            |             |       |                  |          |
|               | 3,000-4,000 | 1           | 26             | 8195             | -0.136 (0.040)*** | -0.46%   | 42         | 1           | 4905  | -0.038 (0.021) . | -1.17%   |
| 2             |             | 20          | 6644           | -0.047 (0.025) . | -0.15%            |          |            |             |       |                  |          |
| 4             |             | 34          | 11641          | -0.080 (0.041) . | -0.06%            |          |            |             |       |                  |          |

| Location | Band        | Time period | All Casualties |       |                   |          | Fatalities |             |      |                  |          |
|----------|-------------|-------------|----------------|-------|-------------------|----------|------------|-------------|------|------------------|----------|
|          |             |             | BW             | n     | $\tau_{SRD}$      | % Change | BW         | Time period | n    | $\tau_{SRD}$     | % Change |
|          |             | 5           | 44             | 14985 | -0.222 (0.050)*** | -0.14%   |            |             |      |                  |          |
|          | 4,000-5,000 | 1           | 26             | 9825  | -0.129 (0.032)*** | -0.36%   |            |             |      |                  |          |
|          | 4,000-5,000 | 5           | 44             | 17874 | -0.252 (0.057)*** | -0.12%   |            |             |      |                  |          |
|          | 5,000-6,000 | 1           | 22             | 8525  | -0.187 (0.037)*** | -0.46%   | 44         | 1           | 4491 | -0.042 (0.014)** | -1.71%   |
|          |             | 4           | 34             | 12033 | -0.127 (0.039)**  | -0.07%   |            |             |      |                  |          |
|          |             | 5           | 48             | 15408 | -0.279 (0.056)*** | -0.14%   |            |             |      |                  |          |
|          | 6,000-7,000 | 5           | 42             | 2394  | -0.191 (0.086)*   | -1.04%   |            |             |      |                  |          |

Notes: Significance notation: p-values 0 '\*\*\*' 0.001 '\*\*' 0.01 '\*' 0.05 '.' 0.1 ' ' 1. Standard errors in parentheses. BW refers to bandwidth in time period units,  $\tau_{SRD}$  refers to the sharp RDD average treatment effect due to DST transition.

For peer review only

### 3.1. Spring transition

As shown in the tables, the majority of models with significant average treatment effects show a reduction in the number of casualties at the Spring transition. For the whole of Great Britain, approximately 0.075 (-0.003%) fewer total casualties are observed on average per year. The time of day models further indicate reductions in total casualties ranging from 0.06 to 0.16 fewer casualties per year across all time periods except the morning peak (in percentages, -0.01% to -0.12%). In terms of fatalities in isolation, there are 0.07 (-0.7%) fewer fatalities observed in the twilight period.

#### *Latitudinal analysis*

In the disaggregate models of Northing bands, there are significant reductions in total casualties in 6 out of 12 bands. The reductions range from approximately 0.07 to 0.21 fewer total casualties (-0.04% to -3.31%) per year in all time periods except the morning peak. In terms of fatalities, there are 0.05 to 0.13 fewer fatalities per year (-2.58% to -4.89%) in the twilight time period in consecutive bands 2000-5000.

#### *Longitudinal analysis*

In the disaggregate models of Easting bands, there are significant effects in 4 out of 7 bands. There are approximately 0.07 to 0.17 fewer total casualties (-0.02% to -0.64%) in all time periods except the morning peak. For the fatality models, in band 3000-4000, there is a significant reduction of 0.14 fatalities (-2.89%) in the twilight time period, and a 0.02 increase in fatalities (0.59%) in the inter-peak time period.

### 3.2. Autumn transition

As with the Spring transition, in the Autumn transition, the majority of models with significant average treatment effects report a reduction in casualties. Considering Great Britain as a whole, there are no significant effects. However, when splitting by time of day, there are reductions in total casualties in every time period ranging from 0.01 to 0.23 fewer total casualties on average per year (-0.01% to -0.13%). In terms of fatalities, there are 0.03 fewer fatalities (-0.40%) in the twilight time period and 0.04 fewer fatalities (-0.17%) in the night time period.

#### *Latitudinal analysis*

In the disaggregate models of Northing bands, there are significant effects in 8 out of 12 bands. All significant effects are negative with the exception of band 0-1000, where there is an increase of 0.06 in the total number of casualties (0.42%) in the AM peak. The remaining negative effects range from a 0.08 to 0.36 reduction in the total number of casualties (-0.09% to -11.53%), and all significant effects are observed across all time periods except the interpeak. For fatalities, in band 1000-2000, there are 0.05 fewer fatalities (-1.45%) in the twilight time period and 0.08 fewer fatalities (-1.12%) in the night time period.

### *Longitudinal analysis*

In the disaggregate models of Easting bands, 6 out of 7 bands report significant effects in the total number of casualties. All significant effects are negative and they are observed in all time periods except the inter-peak. The effects range from 0.05 to 0.28 fewer total casualties (-0.06% to -3.34%). For the fatality models, in band 5000-6000, there are 0.04 fewer fatalities (-1.71%) in the twilight time period. There are additional reductions in fatalities in band 2000-3000 in the inter-peak, where there are 0.06 fewer fatalities (-3.00%), and in band 3000-4000 in the twilight time period, where there are 0.04 fewer fatalities (-1.17%).

## **4. Discussion**

### *4.1. Pooled analysis of Great Britain*

When Great Britain is viewed as a whole regionally and without time segmentation, there is a statistically significant casual effect indicating a very minor reduction of 0.075 (0.003%) in the total number of casualties at the Spring DST transition. The average treatment effect in all other pooled analyses are insignificant at a minimum significance level of  $\geq 90\%$ .

When segmenting the data, there are further geographical zones and time periods with statistically significant average treatment effects. Our analyses therefore indicate that it is important to investigate the impacts of DST transitions at disaggregate spatial and temporal levels, as well as analysing the aggregate effects.

### *4.2. Morning time periods - sleep and light hypotheses*

At the Spring transition, clocks are moved forward one hour and this can result in a loss of sleep in the morning. Therefore, in the time of day models, we would expect to see an increase in casualties in the twilight and morning time periods. In terms of the regional effects, the sun rises later in the west and north. As such, those in the west and north of Great Britain would experience darker mornings than those in the east and south, and so more casualties would be expected in the west and north.

For the aggregate analysis of Great Britain, the time of day models show minor reductions in both total casualties and fatalities in the twilight period (from midnight to 7am) and no effect in the AM peak (7-10am), in opposition to the sleep hypothesis. For the Northing and Easting time of day models, the results again do not support the sleep hypothesis; in every significant twilight and AM peak model, there is a reduction in the number of total casualties and fatalities. In terms of regional differences, we do not observe a systematic pattern showing progressively more casualties in the west and north in morning time periods as per the light hypothesis.

In the Autumn transition, clocks are moved back one hour and this can lead to more sleep in the morning. Regionally, the west and north of Great Britain would again experience darker mornings than the east and south. Therefore, fewer casualties would be expected in the twilight and morning time periods, however, this effect could be minimised in the west and north as the darker mornings could offset the later wake up times, resulting in minimal overall sleep changes.

1  
2  
3  
4  
5  
6  
7 In the west and north regions, we would therefore expect to see minimal effects at the DST  
8 transition.

9 In the aggregate time of day models for Great Britain, the results support the sleep  
10 hypothesis as there are reductions in casualties during the twilight and AM peak periods. For the  
11 Northing and Easting time of day models, the sleep hypothesis is again supported with  
12 reductions in the twilight and AM peak periods, though with one exception. In the AM peak  
13 period in Northing band 0-1000, there is a minor increase in the total number of casualties, in  
14 opposition to the sleep hypothesis. In terms of regional differences, there is minimal support for  
15 a systematic pattern that shows progressively fewer casualties towards the east and south in  
16 morning time periods as per the light hypothesis.  
17  
18

#### 19 *4.3. Evening time periods - light hypothesis*

21 At the Spring transition, there is a more light in the evenings and so we would expect to see a  
22 reduction in casualties. In terms of regional effects, the east and south become darker than the  
23 west and north in the evenings, and so we would expect fewer casualties in the west and north.  
24 In the aggregate models of Great Britain, we observe a minor reduction in the PM peak (4-7pm)  
25 and night time periods (7pm-midnight) in line with the light hypothesis. In the Northing and  
26 Easting time of day models, the light hypothesis is again supported in the PM peak and night  
27 time periods with reductions in casualties. However, for regional differences, there is minimal  
28 support for a systematic pattern that shows progressively fewer casualties towards the west and  
29 north in evening time periods.  
30  
31

32 At the Autumn transition, there is a reduction in light in the evenings and so an increase  
33 in casualties is expected. The east and south again become darker than the west and north in the  
34 evenings, and so fewer casualties are expected in the west and north. In the aggregate models of  
35 Great Britain, the light hypothesis is not supported in the PM peak and night time periods, as  
36 minor reductions in casualties are observed. In the Northing and Easting time of day models, the  
37 light hypothesis is again unsupported as reductions in casualties are observed in the PM peak and  
38 night time periods. Furthermore, we do not observe a systematic pattern that shows progressively  
39 fewer casualties towards the west and north in evening time periods.  
40  
41

#### 42 *4.4. Magnitude of impacts at DST transitions*

43  
44 In the Daylight Savings Bill 2010-2011, it was estimated that there would be 80 fewer fatalities  
45 if the UK followed CET time [4]. A more recent report on EU DST changes states that there  
46 would be 30 fewer fatalities as a result of eliminating DST transitions altogether [3].  
47

48 Overall, our analysis suggests that DST transitions have a minor positive impact rather  
49 than a detrimental impact on road traffic casualties and fatalities. For total casualties, 59 out of  
50 387 models have significant average treatment effects, while for fatalities 13 out of 189 models  
51 have significant effects. The majority of significant models (70 out of 72 models) report a  
52 negative effect, indicating a reduction in the number of casualties at the DST transitions.  
53

54 If we sum the significant average treatment effects for fatalities in the regional time of  
55 day models, we can obtain estimates of the effect on the total number of fatalities per year in  
56 Great Britain for the Spring and Autumn transitions combined. Two estimates are generated: one  
57  
58



1  
2  
3  
4  
5  
6  
7 for Easting band segmentation and one for Northing band segmentation. For the Eastings bands  
8 there are in total 0.25 fewer fatalities across Great Britain, while for the Northings bands there  
9 are in total 0.36 fewer fatalities across Great Britain per year for the Spring and Autumn  
10 transitions combined. Our analysis therefore reports minor reductions in fatalities at the DST  
11 transitions, rather than increases in fatalities as estimated in House of Lords [3] and Bennett [4].  
12

13 Similarly, for the total number of casualties of all severities, we find that there are 3.3  
14 fewer total casualties reported in the Eastings band analysis and 3.8 fewer total casualties per  
15 year in the Northings band analysis across Great Britain for the Spring and Autumn transitions  
16 combined. Therefore, the results for casualties of all severities also question the estimated  
17 reduction in fatalities only as per House of Lords [3] and Bennett [4].  
18

#### 19 4.5. Limitations

20  
21  
22 One limitation of the RDD methodology is that is applicable to ex-post analyses and not suitable  
23 for making ex-ante predictions. Therefore, the results reflect the impact of DST transitions on  
24 road safety over the study period of 2005-2018, and it is difficult to generalise the results to  
25 predict the impact of potential DST changes in the future. However, we have no compelling  
26 reason to believe that the average treatment effect will change significantly over time.  
27

28 The data from the Department for Transport STATS19 database may also pose potential  
29 limitations, as the data are compiled from police reports. As a result, there could be potential  
30 under-reporting of casualties. One previous study estimated that the number of accidents  
31 classified as Serious could be under-reported by a factor of two [30]. Another data-related  
32 limitation is the sparse data in the northernmost regions of Scotland. Due to the limited number  
33 of observations, the RDD models reported high standard errors of the average treatment effect  
34 estimator and low statistical significance in these regions, and in some cases, estimates were not  
35 able to be computed. As such, in future work, either alternate data sources or alternate statistical  
36 analysis techniques for small sample data are recommended.  
37

38 Finally, it should be noted that we aimed to condition for potential bias in traffic volumes  
39 through the inclusion of seasonal year, day of week, and time of day variables along with  
40 treatment of heteroskedasticity and autocorrelation of the error term to account for potential  
41 unobserved confounders. However, there may be additional unobserved factors that we have not  
42 accounted for which may lead to potentially biased estimates.  
43

## 44 5. Conclusion

45  
46  
47 In this paper, we find that DST transitions have only a minor positive impact on road casualties  
48 and fatalities. For total casualties, 59 out of 387 models have significant average treatment  
49 effects, while for fatalities 13 out of 189 models have significant effects. The majority of models  
50 with a significant average treatment effect (70 out of 72 models) report a negative effect,  
51 indicating a reduction in the number of casualties at the DST transitions.  
52

53 Considering Great Britain as a whole, we find a significant effect indicating a minor  
54 0.003% reduction in the total number of casualties in the Spring transition into DST. The  
55 average treatment effects in all other aggregate models are insignificant at a minimum  
56 significance level of  $\geq 90\%$ . When segmenting the data spatially and temporally, there are more  
57  
58

1  
2  
3  
4  
5  
6  
7 models with statistically significant average treatment effects. This highlights the importance of  
8 investigating the impacts of DST transitions at a disaggregate level.

9 The disaggregate spatial and temporal models do not provide clear support or rejection of  
10 the sleep and light hypotheses at the transitions. At the Autumn transition, the temporal analyses  
11 indicate support for the sleep hypothesis as there are fewer casualties in the morning time  
12 periods, and in the Spring transition, the temporal analyses indicate support for the light  
13 hypothesis as there are fewer casualties in the evening time periods. For the remaining  
14 transitions, there is minimal support for the sleep and light hypotheses in both the temporal and  
15 regional analyses. In cases where the hypotheses are not supported, other factors such as driver  
16 behaviour and other socio-economic characteristics may be the main cause of the observed  
17 estimated changes.  
18

19 In terms of policy impacts, the Daylight Savings Bill 2010-2011 estimates that 80 lives  
20 would be saved per year from transitioning to CET [4] and the report on EU DST changes  
21 estimates 30 lives saved per year as a result of abolishing DST altogether [3]. Our results  
22 question these figures and indicate that there are 0.25 - 0.36 fewer road fatalities on average per  
23 year at both the Spring and Autumn DST transitions combined, and 3.3 - 3.9 fewer total  
24 casualties of all severities on average per year at Spring and Autumn transitions combined. The  
25 light hypothesis is the main driver for the Daylight Savings Bill, while both the sleep and light  
26 hypotheses are put forward in the recent report on abolishing DST altogether in the EU.  
27 However, as mentioned, we do not find definitive evidence to support the sleep and light  
28 hypotheses.  
29

30  
31 A number of areas for future work are recommended. In some cases, modelling was  
32 prohibited due to a lack of data in the north of Great Britain, and therefore it is suggested that  
33 alternate data sources or alternate statistical analysis techniques for small sample data are  
34 employed to ascertain the impact of DST transitions in these regions. In regions where the sleep  
35 and light hypotheses did not hold, further research to investigate the impact of other potentially  
36 influential socio-demographic factors could be undertaken. In this analysis, we considered all  
37 casualties across all socio-demographic groups. Further analyses could be undertaken to provide  
38 a more disaggregate characterisation of the impact of DST transitions, for example, segmenting  
39 casualties by age could assist in testing whether DST transitions impact children walking to  
40 school as hypothesised in the Daylight Saving Bill 2010-11.  
41  
42

#### 43 **Author contribution statement**

44 The corresponding author attests that all listed authors meet authorship criteria and that no others  
45 meeting the criteria have been omitted.  
46  
47

#### 48 **Author CRediT statement**

49 Conceptualisation: DJ Graham; Data curation: R Sood; Methodology: DJ Graham, R Singh, R  
50 Sood; Formal analysis: R Singh, R Sood; Writing-original draft: R Singh, R Sood, DJ Graham;  
51 Writing-review and editing: R Singh, DJ Graham, R Sood; Supervision: DJ Graham; Funding  
52 acquisition: DJ Graham.  
53  
54  
55  
56  
57  
58  
59  
60

### Funding statement

This research received no specific grant from any funding agency in the public, commercial or not-for-profit sectors; the work was internally funded by the Transport Strategy Centre (TSC) at Imperial College London.

### Competing interests statement

None declared.

### Ethics approval statement

Ethics approval is not applicable as no human nor animal participants were involved in the study.

### Data sharing statement

The data used in this study are available open-source from the Department for Transport at the following URL: <https://www.gov.uk/government/collections/road-accidents-and-safety-statistics>.

### References

- [1] European Commission. Proposal for a Directive of the European Parliament and of the Council discontinuing seasonal changes of time and repealing Directive 2000/84/EC. Technical Report COM(2018)0639, 2018.
- [2] European Parliament. European Parliament legislative resolution of 26 March 2019 on the proposal for a directive of the European Parliament and of the Council discontinuing seasonal changes of time and repealing Directive 2000/84/EC (COM(2018)0639 – C8-0408/2018 – 2018/0332(COD)), 2019.
- [3] House of Lords. Clock changes: is it time for change? . Technical Report European Union Committee, 5th Report of Session 2019–21, House of Lords Authority, 2020.
- [4] Oliver Bennett. Daylight Saving Bill 2010-11, 2010.
- [5] M. Meira e Cruz, M. Miyazawa, R. Manfredini, D. Cardinali, J. A. Madrid, R. Reiter, J. F. Araujo, R. Agostinho, and D. Acuna-Castroviejo. Impact of Daylight Saving Time on circadian timing system: An expert statement. *European Journal of Internal Medicine*, 60(January):1–3, 2019.
- [6] Jason Varughese and Richard P. Allen. Fatal accidents following changes in daylight savings time: The American experience. *Sleep Medicine*, 2(1):31–36, 2001.
- [7] Rachel N. Carey and Kiran M. Sarma. Impact of daylight saving time on road traffic collision risk: A systematic review. *BMJ Open*, 7(6):1–14, 2017.
- [8] S. Plainis, I. J. Murray, and I. G. Pallikaris. Road traffic casualties: Understanding the night-time death toll. *Injury Prevention*, 12(2):125–128, 2006.
- [9] Austin C. Smith. Spring forward at your own risk: Daylight saving time and fatal vehicle crashes. *American Economic Journal: Applied Economics*, 8(2):65–91, 2016.
- [10] David Robb and Thomas Barnes. Accident rates and the impact of daylight saving time transitions. *Accident Analysis & Prevention*, 111(April 2017):193–201, 2 2018.
- [11] Douglas Coate and Sara Markowitz. The effects of daylight and daylight saving time on US pedestrian fatalities and motor vehicle occupant fatalities. *Accident Analysis and Prevention*, 36(3):351–357, 2004.
- [12] Joseph Crawley. *Testing for Robustness in the Relationship between Fatal Automobile Crashes and Daylight Saving Time*. PhD thesis, University of California, Berkeley, 2012.
- [13] Lena Marie Lindenberger, Hanns Ackermann, and Markus Parzeller. The controversial debate about daylight saving time (DST)—results of a retrospective forensic autopsy study in Frankfurt/Main (Germany) over 10 years (2006–2015). *International Journal of Legal Medicine*, 133(4):1259–1265, 2019.
- [14] Jean Adams, Martin White, and Peter Heywood. Year-round daylight saving and serious or fatal road traffic injuries in children in the north-east of England. *Journal of Public Health*, 27(4):316–317, 2005.

- 1  
2  
3  
4  
5  
6  
7 [15] John M. Sullivan and Michael J. Flannagan. The role of ambient light level in fatal crashes: Inferences from  
8 daylight saving time transitions. *Accident Analysis and Prevention*, 34(4):487–498, 2002.
- 9 [16] Jim Uttley and Steve Fotios. The effect of ambient light condition on road traffic collisions involving  
10 pedestrians on pedestrian crossings. *Accident Analysis and Prevention*, 108(March):189–200, 2017.
- 11 [17] C. Hausman and D. S. Rapson. Regression Discontinuity in Time: Considerations for Empirical Applications.  
12 *Annual Review of Resource Economics*, 10:533–552, 2018.
- 13 [18] Department for Transport. Road casualty annual statistics, 2021. URL  
14 [www.gov.uk/government/collections/road-accidents-and-safety-statistics](http://www.gov.uk/government/collections/road-accidents-and-safety-statistics).
- 15 [19] Department for Transport. Reported Road Casualties in Great Britain: notes, definitions, symbols and  
16 conventions. *Department for Transport*, pages 1–6, 2017.
- 17 [20] Ordnance Survey. Using the National Grid, 2021. URL [getoutside.ordnancesurvey.co.uk/guides](http://getoutside.ordnancesurvey.co.uk/guides).
- 18 [21] Guido W. Imbens and Thomas Lemieux. Regression discontinuity designs: A guide to practice. *Journal of*  
19 *Econometrics*, 142:615–635, 2008. doi: 10.1016/j.jeconom.2007.05.001.
- 20 [22] David S Lee and Thomas Lemieux. Regression Discontinuity Designs in Economics. *Journal of Economic*  
21 *Literature*, 48(2):281–355, 2010.
- 22 [23] Felix Thoemmes, Wang Liao, and Ze Jin. The Analysis of the Regression-Discontinuity Design in R. *Journal*  
23 *of Educational and Behavioral Statistics*, 42(3):341–360, 2017.
- 24 [24] Sebastian Calonico, Matias D. Cattaneo, and Rocio Titiunik. Rdrobust: An R package for robust  
25 nonparametric inference in regression-discontinuity designs. *R Journal*, 7(1):38–51, 2015.
- 26 [25] T. S. Breusch. Testing for Autocorrelation in Dynamic Linear Models. *Australian Economic Papers*, 17:334–  
27 335, 1978.
- 28 [26] L. G. Godfrey. Testing Against General Autoregressive and Moving Average Error Models when the  
29 Regressors Include Lagged Dependent Variables. *Econometrica*, 46:1293–1301, 1978.
- 30 [27] Newey W. K. and K. D. West. A Simple, Positive-Definite, Heteroskedasticity and Autocorrelation Consistent  
31 Covariance Matrix. *Econometrica*, 55:703–708, 1987.
- 32 [28] T. S. Breusch and A. R. Pagan. A Simple Test for Heteroskedasticity and Random Coefficient Variation.  
33 *Econometrica*, 47(5):1287–1294, 1979.
- 34 [29] J. G. MacKinnon and H. White. Some Heteroskedasticity-Consistent Covariance Matrix Estimators with  
35 Improved Finite Sample Properties. *Journal of Econometrics*, 29:305–325, 1985.
- 36 [30] Heather Ward, Ronan Lyons, and Roselle Thoreau. Under-reporting of Road Casualties – Phase 1. Technical  
37 Report Road Safety Research Report No. 69, 2006.
- 38  
39  
40  
41  
42  
43  
44  
45  
46  
47  
48  
49  
50  
51  
52  
53  
54  
55  
56  
57  
58  
59  
60

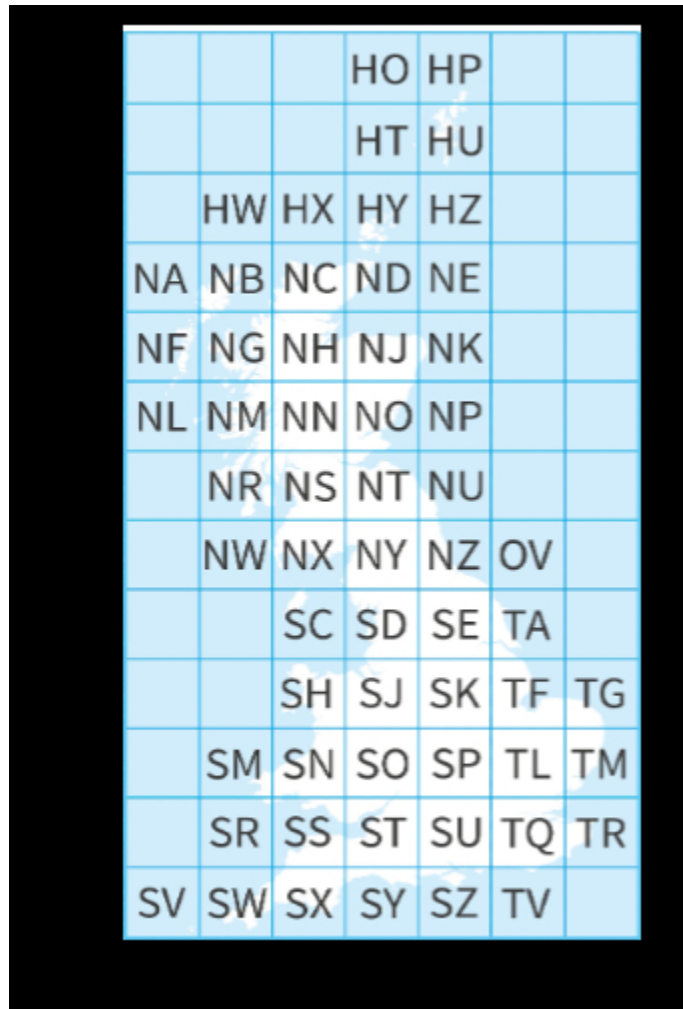

Figure 1: Definition of Northing and Eastings bands in Great Britain (adapted from Ordnance Survey [20], not to scale).

91x133mm (96 x 96 DPI)

## STROBE Statement—checklist of items that should be included in reports of observational studies

|                              | Item No | Recommendation                                                                                                                                                                                                                                                                                                                                                                                                                                                         | Page No |
|------------------------------|---------|------------------------------------------------------------------------------------------------------------------------------------------------------------------------------------------------------------------------------------------------------------------------------------------------------------------------------------------------------------------------------------------------------------------------------------------------------------------------|---------|
| <b>Title and abstract</b>    | 1       | (a) Indicate the study's design with a commonly used term in the title or the abstract                                                                                                                                                                                                                                                                                                                                                                                 | 1       |
|                              |         | (b) Provide in the abstract an informative and balanced summary of what was done and what was found                                                                                                                                                                                                                                                                                                                                                                    | 1       |
| <b>Introduction</b>          |         |                                                                                                                                                                                                                                                                                                                                                                                                                                                                        |         |
| Background/rationale         | 2       | Explain the scientific background and rationale for the investigation being reported                                                                                                                                                                                                                                                                                                                                                                                   | 2-3     |
| Objectives                   | 3       | State specific objectives, including any prespecified hypotheses                                                                                                                                                                                                                                                                                                                                                                                                       | 3       |
| <b>Methods</b>               |         |                                                                                                                                                                                                                                                                                                                                                                                                                                                                        |         |
| Study design                 | 4       | Present key elements of study design early in the paper                                                                                                                                                                                                                                                                                                                                                                                                                | 3-6     |
| Setting                      | 5       | Describe the setting, locations, and relevant dates, including periods of recruitment, exposure, follow-up, and data collection                                                                                                                                                                                                                                                                                                                                        | 3-4     |
| Participants                 | 6       | (a) <i>Cohort study</i> —Give the eligibility criteria, and the sources and methods of selection of participants. Describe methods of follow-up<br><i>Case-control study</i> —Give the eligibility criteria, and the sources and methods of case ascertainment and control selection. Give the rationale for the choice of cases and controls<br><i>Cross-sectional study</i> —Give the eligibility criteria, and the sources and methods of selection of participants | NA      |
|                              |         | (b) <i>Cohort study</i> —For matched studies, give matching criteria and number of exposed and unexposed<br><i>Case-control study</i> —For matched studies, give matching criteria and the number of controls per case                                                                                                                                                                                                                                                 | NA      |
| Variables                    | 7       | Clearly define all outcomes, exposures, predictors, potential confounders, and effect modifiers. Give diagnostic criteria, if applicable                                                                                                                                                                                                                                                                                                                               | 5       |
| Data sources/<br>measurement | 8*      | For each variable of interest, give sources of data and details of methods of assessment (measurement). Describe comparability of assessment methods if there is more than one group                                                                                                                                                                                                                                                                                   | 3-6     |
| Bias                         | 9       | Describe any efforts to address potential sources of bias                                                                                                                                                                                                                                                                                                                                                                                                              | 5-6     |
| Study size                   | 10      | Explain how the study size was arrived at                                                                                                                                                                                                                                                                                                                                                                                                                              | 3,4,6   |
| Quantitative variables       | 11      | Explain how quantitative variables were handled in the analyses. If applicable, describe which groupings were chosen and why                                                                                                                                                                                                                                                                                                                                           | 5       |
| Statistical methods          | 12      | (a) Describe all statistical methods, including those used to control for confounding                                                                                                                                                                                                                                                                                                                                                                                  | 4-6     |
|                              |         | (b) Describe any methods used to examine subgroups and interactions                                                                                                                                                                                                                                                                                                                                                                                                    | 5       |
|                              |         | (c) Explain how missing data were addressed                                                                                                                                                                                                                                                                                                                                                                                                                            | 5       |
|                              | NA      | (d) <i>Cohort study</i> —If applicable, explain how loss to follow-up was addressed<br><i>Case-control study</i> —If applicable, explain how matching of cases and controls was addressed<br><i>Cross-sectional study</i> —If applicable, describe analytical methods taking account of sampling strategy                                                                                                                                                              |         |
|                              |         | (e) Describe any sensitivity analyses                                                                                                                                                                                                                                                                                                                                                                                                                                  | 6       |

Continued on next page

1  
2  
3  
4  
5  
6  
7  
8  
9  
10  
11  
12  
13  
14  
15  
16  
17  
18  
19  
20  
21  
22  
23  
24  
25  
26  
27  
28  
29  
30  
31  
32  
33  
34  
35  
36  
37  
38  
39  
40  
41  
42  
43  
44  
45  
46  
47  
48  
49  
50  
51  
52  
53  
54  
55  
56  
57  
58  
59  
60**Results**

|                  |     |                                                                                                                                                                                                              |     |
|------------------|-----|--------------------------------------------------------------------------------------------------------------------------------------------------------------------------------------------------------------|-----|
| Participants     | 13* | (a) Report numbers of individuals at each stage of study—eg numbers potentially eligible, examined for eligibility, confirmed eligible, included in the study, completing follow-up, and analysed            | NA  |
|                  |     | (b) Give reasons for non-participation at each stage                                                                                                                                                         | NA  |
|                  |     | (c) Consider use of a flow diagram                                                                                                                                                                           | NA  |
| Descriptive data | 14* | (a) Give characteristics of study participants (eg demographic, clinical, social) and information on exposures and potential confounders                                                                     | NA  |
|                  |     | (b) Indicate number of participants with missing data for each variable of interest                                                                                                                          | NA  |
|                  |     | (c) <i>Cohort study</i> —Summarise follow-up time (eg, average and total amount)                                                                                                                             | NA  |
|                  |     | Note: No human/animal participants were involved but a summary of descriptive statistics on casualties is given                                                                                              | 4   |
| Outcome data     | 15* | <i>Cohort study</i> —Report numbers of outcome events or summary measures over time                                                                                                                          | NA  |
|                  |     | <i>Case-control study</i> —Report numbers in each exposure category, or summary measures of exposure                                                                                                         | NA  |
|                  |     | <i>Cross-sectional study</i> —Report numbers of outcome events or summary measures                                                                                                                           | NA  |
| Main results     | 16  | (a) Give unadjusted estimates and, if applicable, confounder-adjusted estimates and their precision (eg, 95% confidence interval). Make clear which confounders were adjusted for and why they were included | 6-9 |
|                  |     | (b) Report category boundaries when continuous variables were categorized                                                                                                                                    | 5   |
|                  |     | (c) If relevant, consider translating estimates of relative risk into absolute risk for a meaningful time period                                                                                             | NA  |
| Other analyses   | 17  | Report other analyses done—eg analyses of subgroups and interactions, and sensitivity analyses                                                                                                               | NA  |

**Discussion**

|                  |    |                                                                                                                                                                            |       |
|------------------|----|----------------------------------------------------------------------------------------------------------------------------------------------------------------------------|-------|
| Key results      | 18 | Summarise key results with reference to study objectives                                                                                                                   | 10-13 |
| Limitations      | 19 | Discuss limitations of the study, taking into account sources of potential bias or imprecision. Discuss both direction and magnitude of any potential bias                 | 13    |
| Interpretation   | 20 | Give a cautious overall interpretation of results considering objectives, limitations, multiplicity of analyses, results from similar studies, and other relevant evidence | 11-13 |
| Generalisability | 21 | Discuss the generalisability (external validity) of the study results                                                                                                      | 13    |

**Other information**

|         |    |                                                                                                                                                               |    |
|---------|----|---------------------------------------------------------------------------------------------------------------------------------------------------------------|----|
| Funding | 22 | Give the source of funding and the role of the funders for the present study and, if applicable, for the original study on which the present article is based | 15 |
|---------|----|---------------------------------------------------------------------------------------------------------------------------------------------------------------|----|

\*Give information separately for cases and controls in case-control studies and, if applicable, for exposed and unexposed groups in cohort and cross-sectional studies.

**Note:** An Explanation and Elaboration article discusses each checklist item and gives methodological background and published examples of transparent reporting. The STROBE checklist is best used in conjunction with this article (freely available on the Web sites of PLoS Medicine at <http://www.plosmedicine.org/>, Annals of Internal Medicine at <http://www.annals.org/>, and Epidemiology at <http://www.epidem.com/>). Information on the STROBE Initiative is available at [www.strobe-statement.org](http://www.strobe-statement.org).

# BMJ Open

## A causal regression discontinuity design analysis of road traffic casualties in Great Britain at daylight savings time transitions

|                                 |                                                                                                                            |
|---------------------------------|----------------------------------------------------------------------------------------------------------------------------|
| Journal:                        | <i>BMJ Open</i>                                                                                                            |
| Manuscript ID                   | bmjopen-2021-054678.R1                                                                                                     |
| Article Type:                   | Original research                                                                                                          |
| Date Submitted by the Author:   | 17-Dec-2021                                                                                                                |
| Complete List of Authors:       | Singh, Ramandeep; Imperial College London, Sood, Rohan; Imperial College London<br>Graham, Daniel; Imperial College London |
| <b>Primary Subject Heading</b>: | Public health                                                                                                              |
| Secondary Subject Heading:      | Research methods                                                                                                           |
| Keywords:                       | PUBLIC HEALTH, STATISTICS & RESEARCH METHODS, SLEEP MEDICINE                                                               |
|                                 |                                                                                                                            |

SCHOLARONE™  
Manuscripts



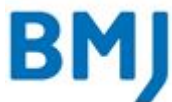

I, the Submitting Author has the right to grant and does grant on behalf of all authors of the Work (as defined in the below author licence), an exclusive licence and/or a non-exclusive licence for contributions from authors who are: i) UK Crown employees; ii) where BMJ has agreed a CC-BY licence shall apply, and/or iii) in accordance with the terms applicable for US Federal Government officers or employees acting as part of their official duties; on a worldwide, perpetual, irrevocable, royalty-free basis to BMJ Publishing Group Ltd ("BMJ") its licensees and where the relevant Journal is co-owned by BMJ to the co-owners of the Journal, to publish the Work in this journal and any other BMJ products and to exploit all rights, as set out in our [licence](#).

The Submitting Author accepts and understands that any supply made under these terms is made by BMJ to the Submitting Author unless you are acting as an employee on behalf of your employer or a postgraduate student of an affiliated institution which is paying any applicable article publishing charge ("APC") for Open Access articles. Where the Submitting Author wishes to make the Work available on an Open Access basis (and intends to pay the relevant APC), the terms of reuse of such Open Access shall be governed by a Creative Commons licence – details of these licences and which [Creative Commons](#) licence will apply to this Work are set out in our licence referred to above.

Other than as permitted in any relevant BMJ Author's Self Archiving Policies, I confirm this Work has not been accepted for publication elsewhere, is not being considered for publication elsewhere and does not duplicate material already published. I confirm all authors consent to publication of this Work and authorise the granting of this licence.

# A causal regression discontinuity design analysis of road traffic casualties in Great Britain at daylight savings time transitions

Ramandeep Singh, Rohan Sood, Daniel J Graham<sup>1</sup>

*Transport Strategy Centre, Department of Civil and Environmental Engineering, Imperial College London  
Exhibition Road, London SW7 2AZ, United Kingdom*

## Abstract

**Objectives:** To determine whether daylight savings time (DST) transitions in the Spring and Autumn have a causal effect on road traffic casualties in Great Britain. We undertake aggregate and disaggregate spatial and temporal analyses to test the commonly referenced sleep and light hypotheses.

**Design:** The study takes the form of a natural experiment in which the DST transitions are interventions to be evaluated. Two outcomes are tested: (i) the total number of casualties of all severities (ii) the number of fatalities.

**Data:** Data are obtained from the UK Department for Transport STATS19 database. Over a period of 14 years between 2005 and 2018, 311,766 total casualties and 5,429 fatalities occurred 3 weeks either side of the Spring DST transition and 367,291 total casualties and 6,650 fatalities occurred 3 weeks either side of the Autumn DST transition.

**Primary outcome measure:** A regression discontinuity design method (RDD) is applied. The presence of a causal effect is determined via the degree of statistical significance and magnitude of the average treatment effect.

**Results:** All significant average treatment effects are negative (54 significant models out of 287 estimated), indicating that there are fewer casualties following the transitions. Overall, bootstrapped summary statistics indicate a reduction of 0.75 in the number of fatalities (95% CI: -1.61, -0.04) and a reduction of 4.73 in the number of total casualties (95% CI: -6.08, -3.27) on average per year at both the Spring and Autumn DST transitions combined.

**Conclusions:** The results indicate minor reductions in the number of fatalities following the DST transitions, and thus our analysis does not support the most recent UK parliamentary estimate that there would be 30 fewer fatalities in Great Britain if DST were to be abolished. Furthermore, the results do not provide conclusive support for either the sleep or light hypotheses.

**Keywords:** Road safety, Daylight savings time, Sleep, Visibility, Regression discontinuity design

---

<sup>1</sup> Corresponding author

*Email address:* d.j.graham@imperial.ac.uk (Daniel J Graham)

### *Strengths and limitations of this study*

- We adopt a causal regression discontinuity design method to generate robust estimates of the impact of DST transitions on road traffic casualties and fatalities in Great Britain.
- We undertake both aggregate and disaggregate spatial and temporal analyses to investigate the impacts of sleep and light disruptions at the transitions.
- We account for potential confounding through the inclusion of seasonal variables at the level of year, day of week, and time of day, and treat heteroskedasticity and autocorrelation to account for unobserved confounders.
- Limitations include potential under-reporting of casualties in the Department for Transport STATS19 database, sparse data leading to estimation difficulties in the northernmost regions of Scotland, and the presence of potential additional unobserved confounders that could lead to biased estimates.

## **1. Introduction**

Since its introduction, the implementation of daylight savings time (DST) has been a contentious issue which has regained attention in recent times. In response to a public consultation held in 2018, the European Parliament in 2019 adopted a position to support the elimination of daylight savings in the European Union (EU), with plans for implementation in 2021 [1, 2]. The United Kingdom (UK) initiated an inquiry to analyse the impact of the EU change to “understand what factors should inform [the UK’s] approach” [3]. The UK also previously debated and ultimately rejected changes to daylight savings in the Daylight Saving Bill 2010-11, which proposed to shift UK time forward by one hour throughout the year to align with Central European Time (CET) [4]. A key argument in the elimination or alteration of daylight savings time is the impact that clock changes have on road safety. In both the academic literature and government parliamentary debates, two issues are highlighted as having an impact on road safety levels: (i) changes in daylight hours could impact alertness due to the required chronobiologic adjustments to the human circadian rhythm [1, 5, 6] - herein referred to as the ‘sleep hypothesis’, and (ii) changing of daylight hours could result in detrimental changes to visibility [7, 8, 4, 3] - herein referred to as the ‘light hypothesis’.

Evidence on the impact of DST transitions on road traffic casualties is currently inconclusive. In the 2010-2011 Daylight Saving Bill, it was argued that there would be 80 fewer fatalities on UK roads if the UK switched to CET [4]. In the more recent UK report on the proposed EU changes, it was stated that abolishing time changes and adopting a permanent move to UK Summer Time could result in 30 fewer fatalities [3]. However, it is unclear how these figures were generated and whether robust causal statistical analysis methods were adopted. In the academic literature, there is mixed consensus regarding the impact of DST transitions. Increases in road casualties are reported for studies undertaken in the US by Smith [9] and in New Zealand by Robb and Barnes [10], while reductions in casualties in the US are reported by Coate and Markowitz [11] and Crawley [12]. Lindenberger et al. [13] reports no significant impacts in their analysis of road casualties in Germany.

1  
2  
3  
4  
5  
6  
7 The aim of this paper is to estimate the causal effect of DST transitions on the number of  
8 road traffic casualties and fatalities in Great Britain. This paper contributes to the literature from  
9 several perspectives. First, the majority of studies adopt non-causal techniques to quantify the  
10 impact of DST transitions, including comparisons of descriptive statistics, linear regression  
11 based on ordinary least squares, and quasi-Poisson regression [10, 11, 13, 14, 15]. Two studies  
12 by Carey and Sarma [7] and Uttley and Fotios [16] adopt a causal regression discontinuity  
13 design (RDD) method similar to ours, however, the studies focus on road casualties in the USA  
14 and pedestrian casualties in the UK, respectively. We therefore contribute to the literature by  
15 adopting a causal RDD method to analyse road traffic casualties in Great Britain, which, to our  
16 knowledge, has not been previously undertaken. Second, use of the RDD method with time as  
17 the forcing variable requires stringent specification tests to be undertaken to ensure that the  
18 models are free from potential confounding factors that can lead to biased estimates. In the  
19 literature on RDD methods applied to DST analyses, these specification tests are not typically  
20 performed. In our analysis, we follow the recommendations made in Hausman and Rapson [17]  
21 to test for model robustness. Finally, there are a number of studies in the UK and US indicating  
22 both causal and non-causal relationships between light levels and casualties at DST transitions  
23 [14,15,16,18,19], however, we are not aware of causal studies testing the sleep hypothesis at  
24 DST transitions. Therefore, in addition to a pooled analysis of Great Britain as a whole, we also  
25 undertake disaggregate spatial and temporal analyses to test the sleep and light hypotheses.  
26  
27  
28

## 29 **2. Methods**

### 30 *2.1. Study area and data*

31  
32  
33 The STATS19 database produced by the Department for Transport is used to obtain records of  
34 road traffic accidents that resulted in personal injury in Great Britain between 2005 and 2018  
35 [dataset][20]. Casualties are defined as personal injuries of any severity as a result of an accident  
36 event. As specified in [21], a single accident event can be associated with more than one  
37 casualty. In this analysis, we focus on total casualties (all severities combined) and fatal  
38 casualties.  
39  
40

41 Three week windows on either side of the DST transitions in Spring and Autumn are  
42 extracted from the total accident data set. Three weeks is chosen to provide enough data for the  
43 optimised local bandwidth to be calculated for each scenario as part of the RDD modelling. It  
44 should be noted that after calculation of the optimal bandwidth, the window around the DST  
45 transitions is likely to be much shorter than three weeks; further details on the optimal bandwidth  
46 calculations are given in Section 2.2. Through data cleaning, less than 0.02% of records have  
47 been removed as a result of missing observations in the fields representing latitude and longitude  
48 and accident event timestamps as well as records over Bank Holidays as these observations  
49 could potentially represent abnormal out-of-season traffic levels which could confound the  
50 baseline time trends before and after the DST transitions. The number of casualties and fatalities  
51 for all of Great Britain over three week windows either side of the transitions are summarised in  
52 Table 1. As shown in the table, there are increases in the number of casualties and fatalities after  
53 both transitions when considering 3 week windows before and after the transitions.  
54  
55  
56  
57  
58  
59  
60

Table 1: Number of casualties, aggregated over Great Britain over  $\pm 3$  week windows from DST transition dates

| Casualty severity | Spring     |           | Autumn     |           |
|-------------------|------------|-----------|------------|-----------|
|                   | Before DST | After DST | Before DST | After DST |
| Total casualties  | 153107     | 158659    | 175796     | 191495    |
| Fatal casualties  | 2517       | 2912      | 3211       | 3439      |

To investigate whether the DST transitions have different regional effects across Great Britain, National Ordnance Survey data are used to divide Great Britain into distinct bands based on latitude and longitude [22]. Using the Ordnance Survey Grid Reference (OSGR) variable within STATS19, each accident event and associated casualties are assigned a Northings band and an Eastings band.

## 2.2. Regression discontinuity design framework

DST is a policy enacted for the entire population of Great Britain and the treatment assignment is deterministic, i.e., there is no ambiguity in treated vs untreated observations. Therefore, the DST treatment imposed at the Spring and Autumn transitions is considered as a sharp discontinuity. Further information on RDD frameworks is presented in Imbens and Lemieux [23] and Lee and Lemieux [24].

In this analysis, we use spatio-temporal units where  $i$  refers to a given local area zone within Great Britain,  $t$  refers to a given time period, where each day is segmented into 5 time periods, and  $z$  refers to year. The assignment of the treatment, i.e. the imposition of the daylight savings transition, is solely dependent on the value of the forcing variable, time  $T$ , as follows:

$$W_{itz} = \begin{cases} 1 & \text{if } T_t \geq c \\ 0 & \text{if } T_t < c \end{cases} \quad (1)$$

where  $c$  is the treatment threshold, which is defined as the DST transition date, and  $W_{itz}$  is the binary treatment in the sharp RDD. In the Spring transition, the treatment is the imposition of Summer Time, while in the Autumn transition, the treatment is the return to GMT. Observations recorded between 00:00 and 01:00 in March and between 00:00 and 02:00 in October on the day of the transition are designated as non-treated in line with when the transition occurs. Over the analysis time period of 2005 to 2018, the transition dates for Spring range from 25 to 31 March and those for Autumn range from 25 to 31 October.

The observation of a discontinuity in the average treatment effect either side of the treatment threshold is evidence of a causal effect of the treatment [23, 24]. The average treatment effect for a sharp discontinuity  $\tau_{SRD}$  in time is defined as:

$$\tau_{SRD} = E[Y_{itz}(1) - Y_{itz}(0) | T_t = c] = \lim_{t \downarrow c} E[Y_{itz} | T_t = t] - \lim_{t \uparrow c} E[Y_{itz} | T_t = t] \quad (2)$$

where  $Y_{itz}(1)$  indicates the potential outcome when treatment is received and  $Y_{itz}(0)$  indicates the potential outcome when treatment is not received. The second equality holds

assuming continuity of expectations in  $T$  i.e.  $E[Y_{itz}(0) | T_t = c] = \lim_{t \uparrow c} E[Y_{itz}(0) | T_t = t] = \lim_{t \uparrow c} E[Y_{itz} | T_t = t]$  [23].

Since the forcing variable is time, we follow the recommendations in Hausman and Rapson [17] to address potential specification issues. To ensure that there are enough observations in the vicinity of the treatment threshold, we segment daily data into 5 time periods, and the data are aggregated at a local area zone level which also provides cross-sectional variance at each time point. By segmenting the data to increase the number of observations close to the treatment threshold, we avoid the need to include observations further away from the threshold which can introduce bias from unobserved confounding variables. We account for potential bias from known confounding variables correlated with time through the inclusion of covariates representing potential seasonal variation in casualties. The covariates are year, day of the week, and the time period associated with each observation. Since the daylight savings transitions are universally applied at fixed transition dates, we do not anticipate issues arising from manipulation of treatment status. Further specification tests are undertaken to ensure validity of the design and these are discussed in section 2.3.

The data sets are arranged in a pseudo-panel form with indexes of local area zone and time period per year. The response variable is the sum of the number of casualties per local area zone and time period per year; in cases where no casualties are observed, a value of 0 is designated. For each of the Spring and Autumn transitions, two base regressions are undertaken as follows: (i) the total number of casualties of all severities, and (ii) the total number of fatalities. The two base regressions are run for three scenarios: (i) for Great Britain overall, (ii) for each Northing band in each time period, and (iii) for each Easting band in each time period. We adopt a local linear specification for the forcing variable of time. The bandwidth for the models is specified according to the conventional method of minimising the mean squared error (MSE) of the average treatment effect [25, 26, 27]. This selection procedure selects the shortest (i.e. local) bandwidth in the vicinity of the treatment threshold subject to the minimisation of the MSE, thus ensuring that the key assumption of random treatment is upheld. The optimal bandwidth selection process is considered superior to nominating an arbitrary bandwidth as was common in the earliest implementations of RDD as it is objective and data-driven rather than subjective [25]. The 'rdrobust' package in the R statistical analysis software is used for the optimal bandwidth calculation [27, 28].

The general equation for the aggregate model of Great Britain is given in equation 3. The regional and time of day analyses enable the investigation of the sleep and light hypotheses. It should be noted that in the disaggregate models, the time of day covariate in equation 3 is not included as the models are pre-segmented by time of day. All modelling has been undertaken using R statistical analysis software.

$$Y_{itz} = \alpha + \tau_{SRD}W_{itz} + \theta_1 K_{itz}(t) + \theta_2 K_{itz,post}(t) + \beta_1 X_{1z} + \beta_2 X_{2t} + \beta_3 X_{3t} + \varepsilon_{itz} \quad (3)$$

where  $Y_{itz}$  is the total number of casualties per local area zone  $i$  per time period  $t$  per year  $z$ ,  $W_{itz}$  is the treatment assignment indicator as previously defined,  $\tau_{SRD}$  is the average treatment effect of interest,  $K_{itz}(t)$  represents the average long term trend across the entire bandwidth i.e.  $K_{itz}(t) = t$ , and  $K_{itz,post}(t)$  is the time trend after the intervention where  $K_{itz,post}(t) = 0$ ,  $t < c$  and  $K_{itz,post}(t) = t - c + 1$ ,  $t \geq c$ . The categorical variables  $X_{1z}$ ,  $X_{2t}$ ,  $X_{3t}$  condition for year, day

of the week, and time period, respectively. Year takes a value from 1 – 14 corresponding to the years 2005 – 2018. As coded in the STATS19 database, the day of the week takes a value 1 – 7 with 1 corresponding to Sunday and 7 corresponding to Saturday. The time of the day takes values as follows: Overnight = 1, AM Peak = 2, Inter Peak = 3, PM Peak = 4, Night = 5. The peak time periods follow the standards adopted by the Department for Transport: AM Peak (07:00 – 09:59), Inter Peak (10:00 – 15:59) and PM Peak (16:00 – 18:59) [18]. Two additional time-bins are added to complete a 24-hour period: Overnight (0:00 – 06:59) and Night (19:00 – 23:59).  $\alpha$  and  $\varepsilon_{itz}$  are the model constant and model random error term, respectively, where  $\varepsilon_{itz} \sim \mathcal{N}(0, \sigma_\varepsilon^2)$ .

It should be noted that the inclusion of group-specific fixed effects for local area zone was trialled to account for potential time-invariant cross-sectional differences. However, using the Bayesian Information Criterion (BIC) as an indicator of model performance, we found that a majority of models performed better with no local area zone effects compared to those with local area effects, and so these effects are not included in the final model form.

### 2.3. Specification tests

As recommended by Hausman and Rapson [17], we perform the following specification tests:

- Specification checks are performed for the bandwidth by varying the bandwidth within the vicinity of the optimal bandwidth and verifying that the magnitude and significance of average treatment effect remains consistent.
- Specification checks are performed for the polynomial order of the forcing variable of time. The BIC is used to judge model performance. Polynomials of up to degree 4 are tested, and we verify that the local linear specification performs best in line with the bandwidth selection procedure.
- The Breusch-Godfrey test [29, 30] is performed to test for autocorrelation of the error term for a lag value up to 10 (2 days). If autocorrelation is present, it is treated using Newey-West standard errors [31], which are heteroskedasticity and autocorrelation consistent (HAC).
- The Breusch-Pagan test [32] is performed to test for heteroskedasticity. If heteroskedasticity is present with no error term autocorrelation, it is treated with heteroskedasticity consistent (HC3) errors [33].
- We perform placebo tests as per the recommendations in [23] to verify the model specification. We partition the original data for each model at the DST cutoff to obtain two smaller data sets. We then calculate a placebo cutoff which is equivalent to the mean value of the running variable in each dataset. We perform two placebo tests for each original model by undertaking the RDD analysis for the placebo cutoffs before the DST cutoff and after the DST cutoff. The original models pass the placebo test if both placebo models yield an insignificant average treatment effect.

Note: Autoregression of the dependent variable is not considered in this analysis, since the majority of casualties per local area zone do not occur in consecutive time periods. The R code for the generation of the RDD models and all specification tests is provided as a Supplementary file.

#### 2.4. Patient and public involvement statement

Please note that no patients nor members of the public were involved in this study.

### 3. Results

The results for the aggregate Spring and Autumn RDD models are presented in Table 2. The results for the disaggregate spatial and temporal RDD analyses are presented in Tables 3 and 4. All results tables summarise cases where the RDD models have passed all specification tests as described in section 2.3, and the average treatment effect at the DST transition is significant at a minimum significance level of  $\alpha = 0.05$  ( $\geq 95\%$ ). A map of the corresponding Northing and Eastings bands is given in Figure 1. As shown in the figure, higher band numbers represent more northern and more eastern locations.

Table 2: Aggregate models of Great Britain - RDD results summary

| Transition | Location                | Casualty type  | BW              | $n$    | $Y_{before}$ | $Y_{after}$ | $\tau_{SRD}$      | % Change |
|------------|-------------------------|----------------|-----------------|--------|--------------|-------------|-------------------|----------|
| Spring     | Aggregate Great Britain | All casualties | 32              | 173888 | 32133        | 27842       | -0.075 (0.009)*** | 0.003%   |
|            |                         | Fatalities     | Not significant |        |              |             |                   |          |
| Autumn     | Aggregate Great Britain | All casualties | Not significant |        |              |             |                   |          |
|            |                         | Fatalities     | Not significant |        |              |             |                   |          |

Notes: Significance notation: p-values 0 '\*\*\*' 0.001 '\*\*' 0.01 '\*' 0.05 '.' 0.1 ' ' 1. Standard errors in parentheses. BW refers to bandwidth in time period units,  $\tau_{SRD}$  refers to the sharp RDD average treatment effect due to DST transition.  $n$  is the total number of observations,  $Y_{before}$  and  $Y_{after}$  refer to the total number of casualties or fatalities before and after the cutoff, respectively



Table 3: Spring transition - disaggregate spatial and temporal models RDD results summary

| Location      | Band        | Time period | All Casualties |          |                           |                          |                   |          | Fatal |          |                           |                          |                  |          |
|---------------|-------------|-------------|----------------|----------|---------------------------|--------------------------|-------------------|----------|-------|----------|---------------------------|--------------------------|------------------|----------|
|               |             |             | BW             | <i>n</i> | <i>Y<sub>before</sub></i> | <i>Y<sub>after</sub></i> | $\tau_{SRD}$      | % Change | BW    | <i>n</i> | <i>Y<sub>before</sub></i> | <i>Y<sub>after</sub></i> | $\tau_{SRD}$     | % Change |
| Aggregate     |             | 1           | 22             | 27145    | 1260                      | 1507                     | -0.110 (0.024)*** | -0.12%   | 40    | 12744    | 133                       | 81                       | -0.067 (0.022)** | -0.70%   |
|               |             | 4           | 38             | 43472    | 6565                      | 6597                     | -0.059 (0.020)**  | -0.01%   |       |          |                           |                          |                  |          |
|               |             | 5           | 46             | 48906    | 6918                      | 4456                     | -0.130 (0.025)*** | -0.03%   |       |          |                           |                          |                  |          |
| Northing band | 1,000-2,000 | 1           | 28             | 9925     | 474                       | 591                      | -0.095 (0.034)**  | -0.28%   |       |          |                           |                          |                  |          |
|               |             | 3           | 36             | 15992    | 3880                      | 3623                     | -0.162 (0.042)*** | -0.06%   |       |          |                           |                          |                  |          |
|               |             | 4           | 38             | 16008    | 2350                      | 2343                     | -0.067 (0.029)*   | -0.04%   |       |          |                           |                          |                  |          |
|               |             | 5           | 48             | 17991    | 2606                      | 1610                     | -0.146 (0.041)*** | -0.08%   |       |          |                           |                          |                  |          |
|               | 2,000-3,000 | 3           | 74             | 19698    | 3182                      | 3346                     | -0.137 (0.047)**  | -0.06%   |       |          |                           |                          |                  |          |
|               | 3,000-4,000 | 1           | 34             | 8365     | 315                       | 340                      | -0.075 (0.035)*   | -0.33%   | 44    | 2648     | 25                        | 19                       | -0.046 (0.021)*  | -2.58%   |
|               |             | 3           | 64             | 14496    | 3197                      | 3044                     | -0.167 (0.063)**  | -0.07%   |       |          |                           |                          |                  |          |
| 5             |             | 52          | 13233          | 1342     | 1073                      | -0.086 (0.042)*          | -0.09%            |          |       |          |                           |                          |                  |          |
| Easting band  | 3,000-4,000 | 1           | 28             | 8370     | 324                       | 311                      | -0.148 (0.056)**  | -0.64%   | 62    | 4510     | 67                        | 34                       | -0.139 (0.055)*  | -2.89%   |
|               | 4,000-5,000 | 1           | 30             | 11814    | 522                       | 479                      | -0.069 (0.030)*   | -0.18%   |       |          |                           |                          |                  |          |
|               |             | 3           | 74             | 28000    | 6172                      | 6235                     | -0.171 (0.049)*** | -0.04%   |       |          |                           |                          |                  |          |
|               |             | 5           | 50             | 20000    | 2244                      | 1874                     | -0.083 (0.038)*   | -0.05%   |       |          |                           |                          |                  |          |
|               | 5,000-6,000 | 1           | 28             | 8530     | 428                       | 559                      | -0.104 (0.039)**  | -0.34%   |       |          |                           |                          |                  |          |
|               |             | 3           | 70             | 24066    | 5588                      | 5651                     | -0.090 (0.037)*   | -0.02%   |       |          |                           |                          |                  |          |
|               |             | 4           | 26             | 8565     | 1479                      | 848                      | -0.110 (0.045)*   | -0.10%   |       |          |                           |                          |                  |          |
| 5             |             | 44          | 15453          | 2235     | 1388                      | -0.149 (0.045)***        | -0.09%            |          |       |          |                           |                          |                  |          |

Notes: Significance notation: p-values 0 ‘\*\*\*’ 0.001 ‘\*\*’ 0.01 ‘\*’ 0.05 ‘.’ 0.1 ‘.’ 1. Standard errors in parentheses. BW refers to bandwidth in time period units, *n* is the total number of observations,  $\tau_{SRD}$  refers to the sharp RDD average treatment effect due to DST transition, *Y<sub>before</sub>* and *Y<sub>after</sub>* refer to the total number of casualties or fatalities before and after the cutoff, respectively, and time periods are as follows: 1-Overnight, 2-AM Peak, 3-Inter-peak, 4-PM Peak, 5-Night.

Table 4: Autumn transition - disaggregate spatial and temporal models RDD results summary

| Location      | Band        | Time period | All Casualties |          |                           |                          |                   |          | Fatal |          |                           |                          |                  |          |
|---------------|-------------|-------------|----------------|----------|---------------------------|--------------------------|-------------------|----------|-------|----------|---------------------------|--------------------------|------------------|----------|
|               |             |             | BW             | <i>n</i> | <i>Y<sub>before</sub></i> | <i>Y<sub>after</sub></i> | $\tau_{SRD}$      | % Change | BW    | <i>n</i> | <i>Y<sub>before</sub></i> | <i>Y<sub>after</sub></i> | $\tau_{SRD}$     | % Change |
| Aggregate     |             | 1           | 18             | 16197    | 1035                      | 1043                     | -0.096 (0.019)*** | -0.13%   | 38    | 13671    | 104                       | 97                       | -0.030 (0.012)*  | -0.40%   |
|               |             | 3           | 72             | 75642    | 20645                     | 20684                    | -0.101 (0.028)*** | -0.01%   |       |          |                           |                          |                  |          |
|               |             | 4           | 34             | 37821    | 7728                      | 5448                     | -0.077 (0.024)**  | -0.01%   |       |          |                           |                          |                  |          |
|               |             | 5           | 32             | 37821    | 7449                      | 3851                     | -0.231 (0.030)*** | -0.04%   | 60    | 24936    | 285                       | 282                      | -0.035 (0.016)*  | -0.17%   |
| Northing band | 0-1,000     | 1           | 38             | 2534     | 90                        | 53                       | -0.153 (0.058)**  | -2.38%   |       |          |                           |                          |                  |          |
|               |             | 5           | 64             | 5044     | 389                       | 297                      | -0.156 (0.062)*   | -0.56%   |       |          |                           |                          |                  |          |
|               | 1,000-2,000 | 1           | 24             | 10015    | 630                       | 572                      | -0.158 (0.036)*** | -0.35%   | 40    | 4888     | 50                        | 19                       | -0.052 (0.017)** | -1.45%   |
|               |             | 4           | 30             | 12048    | 1993                      | 1837                     | -0.129 (0.036)*** | -0.09%   |       |          |                           |                          |                  |          |
|               | 2,000-3,000 | 1           | 32             | 9695     | 408                       | 353                      | -0.112 (0.035)**  | -0.39%   |       |          |                           |                          |                  |          |
|               |             | 5           | 48             | 12708    | 1534                      | 891                      | -0.190 (0.058)**  | -0.17%   |       |          |                           |                          |                  |          |
|               | 3,000-4,000 | 1           | 26             | 6010     | 289                       | 265                      | -0.152 (0.045)*** | -0.74%   |       |          |                           |                          |                  |          |
|               |             | 4           | 40             | 9576     | 1475                      | 1540                     | -0.118 (0.042)**  | -0.11%   |       |          |                           |                          |                  |          |
|               | 5,000-6,000 | 2           | 48             | 3440     | 261                       | 309                      | -0.076 (0.031)*   | -0.41%   |       |          |                           |                          |                  |          |
|               | 7,000-8,000 | 5           | 70             | 1470     | 66                        | 69                       | -0.094 (0.045)*   | -1.84%   |       |          |                           |                          |                  |          |
|               | 8,000-9,000 | 1           | 56             | 583      | 34                        | 27                       | -0.280 (0.097)**  | -11.53%  |       |          |                           |                          |                  |          |
|               |             | 5           | 66             | 793      | 89                        | 51                       | -0.362 (0.128)**  | -5.69%   |       |          |                           |                          |                  |          |
| Easting band  | 1,000-2,000 | 1           | 64             | 1092     | 30                        | 20                       | -0.072 (0.036)*   | -3.34%   |       |          |                           |                          |                  |          |
|               | 2,000-3,000 | 3           |                |          |                           |                          |                   |          | 78    | 3210     | 26                        | 37                       | -0.056 (0.021)** | -3.00%   |
|               |             | 4           | 54             | 7018     | 853                       | 678                      | -0.091 (0.043)*   | -0.15%   |       |          |                           |                          |                  |          |
|               | 3,000-4,000 | 1           | 26             | 8195     | 411                       | 352                      | -0.136 (0.040)*** | -0.46%   |       |          |                           |                          |                  |          |
|               |             | 5           | 44             | 14985    | 2189                      | 1351                     | -0.222 (0.050)*** | -0.14%   |       |          |                           |                          |                  |          |
|               | 4,000-5,000 | 1           | 26             | 9825     | 498                       | 473                      | -0.129 (0.032)*** | -0.36%   |       |          |                           |                          |                  |          |
|               |             | 5           | 44             | 17874    | 2840                      | 1663                     | -0.252 (0.057)*** | -0.12%   |       |          |                           |                          |                  |          |
|               | 5,000-6,000 | 1           | 22             | 8525     | 566                       | 534                      | -0.187 (0.037)*** | -0.46%   | 44    | 4491     | 34                        | 12                       | -0.042 (0.014)** | -1.71%   |
|               |             | 4           | 34             | 12033    | 2397                      | 1532                     | -0.127 (0.039)**  | -0.07%   |       |          |                           |                          |                  |          |
|               | 6,000-7,000 | 5           | 48             | 15408    | 2853                      | 1807                     | -0.279 (0.056)*** | -0.14%   |       |          |                           |                          |                  |          |
| 5             |             | 42          | 2394           | 257      | 106                       | -0.191 (0.086)*          | -1.04%            |          |       |          |                           |                          |                  |          |

Notes: Significance notation: p-values 0 ‘\*\*\*’ 0.001 ‘\*\*’ 0.01 ‘\*’ 0.05 ‘.’ 0.1 ‘ ’ 1. Standard errors in parentheses. BW refers to bandwidth in time period units,  $n$  is the total number of observations,  $\tau_{SRD}$  refers to the sharp RDD average treatment effect due to DST transition,  $Y_{before}$  and  $Y_{after}$  refer to the total number of casualties or fatalities before and after the cutoff, respectively, and time periods are as follows: 1-Overnight, 2-AM Peak, 3-Inter-peak, 4-PM Peak, 5-Night.

For peer review only

### 3.1. Spring transition

As shown in the tables, all models with significant average treatment effects show a reduction in the number of casualties at the Spring transition. For the whole of Great Britain, approximately 0.075 (-0.003%) fewer total casualties are observed on average per year. The time of day models further indicate reductions in total casualties ranging from 0.06 to 0.13 fewer casualties per year across the overnight, PM peak, and night periods (in percentages, -0.01% to -0.03%). In terms of fatalities in isolation, there are 0.07 (-0.7%) fewer fatalities observed in the overnight period.

#### *Latitudinal analysis*

In the disaggregate models of Northing bands, there are significant reductions in total casualties in 3 out of 12 bands. The reductions range from approximately 0.07 to 0.17 fewer total casualties (-0.04% to -0.45%) per year in all time periods except the morning peak. In terms of fatalities, there are 0.05 fewer fatalities per year (-2.58%) in the overnight time period in band 3000-4000.

#### *Longitudinal analysis*

In the disaggregate models of Easting bands, there are significant effects in 3 out of 7 bands. There are approximately 0.07 to 0.17 fewer total casualties (-0.02% to -0.64%) observed in all time periods except the morning peak. For the fatality models, in band 3000-4000, there is a significant reduction of 0.14 fatalities (-2.89%) in the overnight time period.

### 3.2. Autumn transition

As with the Spring transition, in the Autumn transition, all models with significant average treatment effects report a reduction in casualties. Considering Great Britain as a whole, there are no significant effects. However, when splitting by time of day, there are reductions in total casualties in every time period except the morning peak ranging from 0.08 to 0.23 fewer total casualties on average per year (-0.01% to -0.13%). In terms of fatalities, there are 0.03 fewer fatalities (-0.40%) in the overnight time period and 0.04 fewer fatalities (-0.17%) in the night time period.

#### *Latitudinal analysis*

In the disaggregate models of Northing bands, there are significant effects in 7 out of 12 bands. The effects range from a 0.08 to 0.36 reduction in the total number of casualties (-0.09% to -11.53%), and all significant effects are observed across all time periods except the inter-peak. For fatalities, in band 1000-2000, there are 0.05 fewer fatalities (-1.45%) in the overnight time period.

### *Longitudinal analysis*

In the disaggregate models of Easting bands, 6 out of 7 bands report significant effects in the total number of casualties. All significant effects are negative and they are observed in all time periods except the inter-peak. The effects range from 0.07 to 0.28 fewer total casualties (-0.07% to -3.34%). For the fatality models, in band 2000-3000, there are 0.06 fewer fatalities (-3.00%) in the inter-peak, and in band 5000-6000, there are 0.04 fewer fatalities (-1.71%) in the overnight time period.

## **4. Discussion**

### *4.1. Pooled analysis of Great Britain*

When Great Britain is viewed as a whole regionally and without time segmentation, there is a statistically significant causal effect indicating a very minor reduction of 0.075 (0.003%) in the total number of casualties at the Spring DST transition. The average treatment effects in all other pooled analyses are insignificant at a minimum significance level of  $\geq 95\%$ .

When segmenting the data, there are further geographical zones and time periods with statistically significant average treatment effects. Our analyses therefore indicate that it is important to investigate the impacts of DST transitions at disaggregate spatial and temporal levels, as well as analysing the aggregate effects.

### *4.2. Spring transition*

At the Spring transition, clocks are moved forward one hour, resulting in an hour less sleep. The reduction in sleep could have an impact on road casualties throughout the day. In the morning, civil twilight sunrise times change from approximately 5-5:30am to 6-6:30am across Britain. There is an hour less sleep and mornings are darker by an hour before 6-6:30am. These conditions could result in a compounding effect of the sleep and light hypotheses, likely resulting in an increase in casualties. However, for all models with significant effects in the associated overnight period (from 12am-7am), there is a reduction in total casualties and fatalities, in opposition to the sleep and light hypotheses.

In terms of regional effects, in the most western locations of Great Britain, the sun rises approximately 23 minutes later than the most eastern locations. As the civil twilight sunrise times coincide with the beginning of the morning peak in traffic, there could be a possibility of more casualties in the darker western locations compared to the east. Furthermore, sunrise at the most southern locations occurs approximately 20 minutes after the most northern locations, and so there could be a possibility of more casualties in the south relative to the north. For the Northing and Easting time of day models, we do not observe a systematic pattern showing progressively more casualties in the west and south, thus we cannot provide conclusive support for the regional light hypothesis.

At the Spring transition, civil daylight occurs throughout the AM peak (7-10am), inter-peak (10am-4pm), and PM peak (4pm-7pm), and so the light hypothesis is not applicable in these time periods. The sleep hypothesis is applicable, and sleepiness could manifest throughout

1  
2  
3  
4  
5  
6  
7 the day, leading to potential increases in casualties. However, all models with significant effects  
8 in these time periods indicate reductions in total casualties, in opposition to the sleep hypothesis.

9 In the evening, civil twilight sunset times change from approximately 7-7:30pm to 8-  
10 8:30pm across Great Britain. There is an hour less sleep throughout the day, but evenings are  
11 lighter by an hour in the off-peak travel time after 7-7.30pm, therefore resulting in a potential  
12 conflict of the sleep and light hypotheses. In all significant models in the associated night time  
13 period (7pm-12am), there is a reduction in the total number of casualties. This result aligns with  
14 the light hypothesis but at the same time opposes the sleep hypothesis, however, it is not  
15 possible to disentangle the effects. In terms of regional effects of the light hypothesis, the most  
16 western locations experience sunset approximately 23 minutes after the most eastern locations,  
17 so there may be potential for increased casualties in the east compared to the west due to the  
18 light hypothesis, however, the results do not support this. There is minimal difference  
19 (approximately 10 minutes) between sunset times in the north and south, and so we do not  
20 anticipate substantial differences between these locations. In the analysis of northing bands,  
21 there are only two models with significant effects in the night time period which show similar  
22 reductions in total casualties, however, this does not provide substantial systematic evidence of  
23 support for the regional light hypothesis.  
24  
25  
26

### 27 *4.3. Autumn transition*

28  
29  
30 At the Autumn transition, clocks are moved back one hour, and this can lead to an hour  
31 more sleep. The increase in sleep could have an impact on road casualties throughout the day. In  
32 the morning, civil twilight sunrise times change from approximately 7-7:30am to 6-6:30am  
33 across Great Britain. There is an hour more sleep and mornings are lighter by an hour before the  
34 morning peak travel time, therefore compounding the sleep and light hypotheses and resulting in  
35 the most appropriate conditions for a reduction in casualties. For all models with significant  
36 effects in the associated overnight and AM peak periods, there are reductions in total casualties  
37 and fatalities. These results therefore support the compounded impact of the sleep and light  
38 hypotheses, though it is not possible to disentangle the individual impacts of the two hypotheses.  
39 In terms of regional impacts, the most eastern locations experience civil twilight sunrise  
40 approximately 23 minutes before the most western locations, and so eastern locations are  
41 expected to report greater reductions in casualties. Furthermore, the most southern locations  
42 experience sunrise approximately 21 minutes before the most northern locations and so southern  
43 locations are expected to report greater reductions in casualties. However, the results show  
44 minimal support for a systematic pattern that progressively shows a greater reduction in  
45 casualties towards the east and south in the overnight and AM periods, thus we cannot conclude  
46 conclusive support for the regional light hypothesis.  
47  
48

49 At the Autumn transition, civil daylight occurs throughout the inter-peak period (10-  
50 4pm), and so there are no anticipated effects from the light hypothesis. However, the sleep  
51 hypothesis could apply, as there is an extra hour of sleep gained throughout the day, potentially  
52 leading to a reduction in casualties. Indeed, for all models with significant effects in the inter-  
53 peak, there are reductions in total casualties and fatalities, thus supporting the sleep hypothesis.  
54

55 In the evenings, civil sunset times change from approximately 6-6:30pm to 5-5:30pm  
56 across Great Britain. There is an hour more sleep throughout the day but evenings are darker by  
57  
58  
59  
60

1  
2  
3  
4  
5  
6  
7 an hour during the PM peak of traffic. In this situation, there is a potential conflict between the  
8 sleep and light hypotheses. All models with significant effects in the PM peak period (4-7pm)  
9 report reductions in total casualties and fatalities. Therefore, the results support the sleep  
10 hypothesis but oppose the light hypothesis, however, it is not possible to disentangle the impacts  
11 of the two. In terms of regional effects, sunset in the most eastern locations occurs approximately  
12 24 minutes before sunset in the most western locations, and so we can expect more casualties in  
13 the east. Sunset in the most northern locations occurs approximately 13 minutes before sunset in  
14 the most southern locations. Though it is difficult to ascertain whether it is feasible to expect  
15 regional differences, it could be plausible to anticipate more casualties in the north. However, the  
16 northing and easting band models do not provide support for a systematic pattern that  
17 progressively shows a greater increase in casualties towards the east and north in the night  
18 period, thus the results do not support the regional light hypothesis.  
19  
20

#### 21 *4.4. Magnitude of impacts at DST transitions*

22  
23  
24 In the Daylight Savings Bill 2010-2011, it was estimated that there would be 80 fewer fatalities  
25 if the UK followed CET time [4]. A more recent report on EU DST changes states that there  
26 would be 30 fewer fatalities as a result of eliminating DST transitions altogether [3].  
27

28 Overall, our analysis suggests that DST transitions have a minor positive impact rather  
29 than a detrimental impact on road traffic casualties and fatalities. All statistically significant  
30 models (54 models) report a negative average treatment effect, indicating a reduction in the  
31 number of casualties at the DST transitions. Over the 13 northings bands, 7 eastings bands, and  
32 aggregate models, we attempted to generate a total of 212 models for total casualties and  
33 fatalities, respectively. However, due to sparse data in several bands, a number of models were  
34 not able to be estimated; 167 were able to be estimated for total casualties and 120 were able to  
35 be estimated for fatalities. Of these, 46 out of 167 estimated models of total casualties have  
36 significant average treatment effects, and 8 out of 120 estimated models of fatalities have  
37 significant average treatment effects. A potential explanation for why there are fewer fatality  
38 models with a significant average treatment effect could be that there are relatively lower  
39 numbers of fatalities occurring either side of the DST threshold. Furthermore, we acknowledge  
40 that the models with insignificant average treatment effects indicate absence of evidence of a  
41 change in casualties/fatalities at the DST threshold rather than evidence of absence of a change  
42 in casualties/fatalities at the DST threshold.  
43  
44

45 We calculate the combined impact of the Spring and Autumn transitions on road  
46 casualties, and we generate associated 95% bootstrap confidence intervals using 10,000  
47 iterations as per the bias corrected and accelerated (BCa) bootstrap method [34, 35]. The statistic  
48 of interest that we bootstrap is calculated in two steps: (1) We sum all average treatment effects  
49 in the regional time of day models over the Spring and Autumn transitions combined. Two  
50 estimates are generated: one for Easting band segmentation and one for Northing band  
51 segmentation. (2) We calculate the mean of the Easting and Northing band values, and this is  
52 taken as the estimated combined number of casualties over the Spring and Autumn transitions.  
53 We perform this procedure for fatalities and total casualties separately.  
54

55 The bootstrapped values indicate a mean reduction of 0.75 in the number of fatalities on  
56 average per year with a 95% confidence interval ranging from -1.61 to -0.04 (reduction in  
57  
58  
59  
60

1  
2  
3  
4  
5  
6  
7 fatalities). Our analysis therefore reports minor reductions in fatalities at the DST transitions,  
8 rather than an increase of 30-80 fatalities as estimated in House of Lords [3] and Bennett [4].

9 Similarly, for the total number of casualties of all severities, a mean reduction of 4.73 in  
10 the number of total casualties is estimated on average per year with a 95% confidence interval  
11 ranging from -6.08 to -3.27 (reduction in the total number of casualties). Therefore, the results  
12 for casualties of all severities also question the predictions of DST effects reported in House of  
13 Lords [3] and Bennett [4].  
14

#### 15 16 *4.5. Limitations*

17  
18 One limitation of the RDD methodology is that is applicable to ex-post analyses and not suitable  
19 for making ex-ante predictions. Therefore, the results reflect the impact of DST transitions on  
20 road safety over the study period of 2005-2018, and it is difficult to generalise the results to  
21 predict the impact of potential DST changes in the future. However, we have no compelling  
22 reason to believe that the average treatment effect will change significantly over time.

23  
24 The data from the Department for Transport STATS19 database may also pose potential  
25 limitations, as the data are compiled from police reports. As a result, there could be potential  
26 under-reporting of casualties. One previous study estimated that the number of casualties  
27 classified as Serious could be under-reported by a factor of two [36]. Another data-related  
28 limitation is the sparse data in the northernmost regions of Scotland. Due to the limited number  
29 of observations, the RDD models reported high standard errors of the average treatment effect  
30 estimator and low statistical significance in these regions, and in some cases, estimates were not  
31 able to be computed. As such, in future work, either alternate data sources or alternate statistical  
32 analysis techniques for small sample data are recommended.  
33

34  
35 In the interpretation of the results in Section 4.2 and 4.3, we identified instances of where  
36 the sleep and light hypotheses were in conflict, and it was not possible to disentangle and  
37 quantify the separate impacts of the two hypotheses on road casualties. We therefore recommend  
38 future work to investigate how to disentangle the two effects, with a potential solution involving  
39 gathering disaggregate data on sleeping patterns and conditioning for this in the models.

40  
41 Finally, it should be noted that we have addressed potential sources of bias by  
42 conditioning out exogeneous changes in traffic volumes which cannot be attributed to the DST  
43 transitions through the inclusion of seasonal year, day of week, and time of day variables along  
44 with treatment of heteroskedasticity and autocorrelation of the error term to account for potential  
45 unobserved confounders. However, there may be additional unobserved factors that we have not  
46 accounted for which may lead to potentially biased estimates. For example, we were not able to  
47 obtain a data set that identifies every school holiday in each local area zone nor were we able to  
48 obtain weather data at a time period level in each local area zone from 2005-2018. We  
49 acknowledge that this could lead to potentially biased values of the average treatment effect.  
50 However, we would also like to highlight that the bandwidths for each model are narrow around  
51 the cutoffs (the mean bandwidth across all models is 4.3 days either side of the transition), and  
52 the narrow windows would minimise the degree of systematic impacts from school holidays and  
53 weather effects.  
54  
55  
56  
57  
58  
59  
60



## 5. Conclusion

In this paper, we find that DST transitions have only a minor positive impact on road casualties and fatalities. For total casualties, 46 out of 167 models have significant average treatment effects, while for fatalities 8 out of 120 models have significant effects. All models with a significant average treatment effect (54 models) report a negative effect, indicating a reduction in the number of casualties at the DST transitions.

Considering Great Britain as a whole, we find a significant effect indicating a minor 0.003% reduction in the total number of casualties in the Spring transition into DST. The average treatment effects in all other aggregate models are insignificant at a minimum significance level of  $\geq 95\%$ . When segmenting the data spatially and temporally, there are more models with statistically significant average treatment effects. This highlights the importance of investigating the impacts of DST transitions at a disaggregate level.

The disaggregate spatial and temporal models do not provide clear support or rejection of the sleep and light hypotheses at the transitions. At the Autumn transition, the temporal analyses indicate support for the compounded effect of the sleep and light hypotheses in the overnight and AM peak periods as well as support for the sleep hypothesis in the inter-peak period. For the remaining transitions, there is minimal support for the sleep and light hypotheses in both the temporal and regional analyses and in some cases, it is difficult to disentangle potential conflicts between the sleep and light hypotheses. In cases where the hypotheses are not supported, other factors such as driver behaviour and other socio-economic characteristics may be the main cause of the observed estimated changes.

In terms of policy impacts, the Daylight Savings Bill 2010-2011 estimates that 80 lives would be saved per year from transitioning to CET [4] and the report on EU DST changes estimates 30 lives saved per year as a result of abolishing DST altogether [3]. Our results question these figures. We apply a bias corrected and accelerated bootstrap with 10,000 iterations to estimate the total number of fatalities and casualties on average per year over the Spring and Autumn transitions combined. The bootstrapped values indicate a mean reduction of 0.75 in the number of fatalities (95% CI: -1.61, -0.04) and a mean reduction of 4.73 in the number of total casualties (95% CI: -6.08, -3.27) on average per year at both the Spring and Autumn DST transitions combined. The light hypothesis is the main driver for the Daylight Savings Bill, while both the sleep and light hypotheses are put forward in the recent report on abolishing DST altogether in the EU. However, as mentioned, we do not find definitive evidence to support the sleep and light hypotheses.

A number of areas for future work are recommended. In some cases, modelling was prohibited due to a lack of data in the north of Great Britain, and therefore it is suggested that alternate data sources or alternate statistical analysis techniques for small sample data are employed to ascertain the impact of DST transitions in these regions. We also recommend further work to disentangle the impacts of the sleep and light hypotheses in cases where the two are in conflict. In regions where the sleep and light hypotheses did not hold, further research to investigate the impact of other potentially influential socio-demographic factors could be undertaken. In this analysis, we considered all casualties across all socio-demographic groups. Further analyses could be undertaken to provide a more disaggregate characterisation of the impact of DST transitions, for example, segmenting casualties by age could assist in testing

whether DST transitions impact children walking to school as hypothesised in the Daylight Saving Bill 2010-11.

### Author contribution statement

The corresponding author attests that all listed authors meet authorship criteria and that no others meeting the criteria have been omitted.

### Author CRediT statement

Conceptualisation: DJ Graham; Data curation: R Sood; Methodology: DJ Graham, R Singh, R Sood; Formal analysis: R Singh, R Sood; Writing-original draft: R Singh, R Sood, DJ Graham; Writing-review and editing: R Singh, DJ Graham, R Sood; Supervision: DJ Graham; Funding acquisition: DJ Graham.

### Funding statement

This research received no specific grant from any funding agency in the public, commercial or not-for-profit sectors; the work was internally funded by the Transport Strategy Centre (TSC) at Imperial College London.

### Competing interests statement

None declared.

### Ethics approval statement

Ethics approval is not applicable as no human nor animal participants were involved in the study.

### Data availability statement

The data used in this study are available open-source from the Department for Transport at the following URL: <https://www.gov.uk/government/collections/road-accidents-and-safety-statistics>.

### References

- [1] European Commission. Proposal for a Directive of the European Parliament and of the Council discontinuing seasonal changes of time and repealing Directive 2000/84/EC. Technical Report COM(2018)0639, 2018.
- [2] European Parliament. European Parliament legislative resolution of 26 March 2019 on the proposal for a directive of the European Parliament and of the Council discontinuing seasonal changes of time and repealing Directive 2000/84/EC (COM(2018)0639 – C8-0408/2018 – 2018/0332(COD)), 2019.
- [3] House of Lords. Clock changes: is it time for change? . Technical Report European Union Committee, 5th Report of Session 2019–21, House of Lords Authority, 2020.
- [4] Oliver Bennett. Daylight Saving Bill 2010-11, 2010.
- [5] M. Meira e Cruz, M. Miyazawa, R. Manfredini, D. Cardinali, J. A. Madrid, R. Reiter, J. F. Araujo, R. Agostinho, and D. Acuna-Castroviejo. Impact of Daylight Saving Time on circadian timing system: An expert statement. *European Journal of Internal Medicine*, 60(January):1–3, 2019.

- 1  
2  
3  
4  
5  
6  
7 [6] Jason Varughese and Richard P. Allen. Fatal accidents following changes in daylight savings time: The  
8 American experience. *Sleep Medicine*, 2(1):31–36, 2001.
- 9  
10 [7] Rachel N. Carey and Kiran M. Sarma. Impact of daylight saving time on road traffic collision risk: A systematic  
11 review. *BMJ Open*, 7(6):1–14, 2017.
- 12  
13 [8] S. Plainis, I. J. Murray, and I. G. Pallikaris. Road traffic casualties: Understanding the night-time death toll.  
14 *Injury Prevention*, 12(2):125–128, 2006.
- 15  
16 [9] Austin C. Smith. Spring forward at your own risk: Daylight saving time and fatal vehicle crashes. *American*  
17 *Economic Journal: Applied Economics*, 8(2):65–91, 2016.
- 18  
19 [10] David Robb and Thomas Barnes. Accident rates and the impact of daylight saving time transitions. *Accident*  
20 *Analysis & Prevention*, 111(April 2017):193–201, 2 2018.
- 21  
22 [11] Douglas Coate and Sara Markowitz. The effects of daylight and daylight saving time on US pedestrian  
23 fatalities and motor vehicle occupant fatalities. *Accident Analysis and Prevention*, 36(3):351–357, 2004.
- 24  
25 [12] Joseph Crawley. *Testing for Robustness in the Relationship between Fatal Automobile Crashes and Daylight*  
26 *Saving Time*. PhD thesis, University of California, Berkeley, 2012.
- 27  
28 [13] Lena Marie Lindenberger, Hanns Ackermann, and Markus Parzeller. The controversial debate about daylight  
29 saving time (DST)—results of a retrospective forensic autopsy study in Frankfurt/Main (Germany) over 10 years  
30 (2006–2015). *International Journal of Legal Medicine*, 133(4):1259–1265, 2019.
- 31  
32 [14] Jean Adams, Martin White, and Peter Heywood. Year-round daylight saving and serious or fatal road traffic  
33 injuries in children in the north-east of England. *Journal of Public Health*, 27(4):316–317, 2005.
- 34  
35 [15] John M. Sullivan and Michael J. Flannagan. The role of ambient light level in fatal crashes: Inferences from  
36 daylight saving time transitions. *Accident Analysis and Prevention*, 34(4):487–498, 2002.
- 37  
38 [16] Jim Uttley and Steve Fotios. The effect of ambient light condition on road traffic collisions involving  
39 pedestrians on pedestrian crossings. *Accident Analysis and Prevention*, 108(March):189–200, 2017.
- 40  
41 [17] Fotios, S., Robbins, C. J., & Uttley, J. A comparison of approaches for investigating the impact of ambient  
42 light on road traffic collisions. *Lighting Research & Technology*, 53(3), 249–261, 2021.
- 43  
44 [18] Raynham, P., Unwin, J., Khazova, M., & Tolia, S. The role of lighting in road traffic collisions. *Lighting*  
45 *Research & Technology*, 52(4), 485–494, 2020.
- 46  
47 [19] C. Hausman and D. S. Rapson. Regression Discontinuity in Time: Considerations for Empirical Applications.  
48 *Annual Review of Resource Economics*, 10:533–552, 2018.
- 49  
50 [dataset][20] Department for Transport. Data from: Road casualty annual statistics. STATS19 Database Repository,  
51 October 16, 2021. URL [www.gov.uk/government/collections/road-accidents-and-safety-statistics](http://www.gov.uk/government/collections/road-accidents-and-safety-statistics).
- 52  
53 [21] Department for Transport. Reported Road Casualties in Great Britain: notes, definitions, symbols and  
54 conventions. *Department for Transport*, pages 1–6, 2017.
- 55  
56 [22] Ordnance Survey. Using the National Grid, 2021. URL [getoutside.ordnancesurvey.co.uk/guides](http://getoutside.ordnancesurvey.co.uk/guides).
- 57  
58 [23] Guido W. Imbens and Thomas Lemieux. Regression discontinuity designs: A guide to practice. *Journal of*  
59 *Econometrics*, 142:615–635, 2008.
- 60

- 1  
2  
3  
4  
5  
6  
7  
8 [24] David S Lee and Thomas Lemieux. Regression Discontinuity Designs in Economics. *Journal of Economic*  
9 *Literature*, 48(2):281–355, 2010.
- 10 [25] Cattaneo, M. D., and Vazquez-Bare, G. The Choice of Neighborhood in Regression Discontinuity Designs.  
11 *Observational Studies*, 2: 134–146, 2016.
- 12  
13 [26] Guido Imbens and Karthik Kalyanaraman. Optimal bandwidth choice for the regression discontinuity  
14 estimator. *Review of Economic Studies*, 79: 933-959, 2012.
- 15  
16 [27] Sebastian Calonico, Matias D. Cattaneo, and Rocio Titiunik. Rdrobust: An R package for robust nonparametric  
17 inference in regression-discontinuity designs. *R Journal*, 7(1):38–51, 2015.
- 18  
19 [28] Felix Thoemmes, Wang Liao, and Ze Jin. The Analysis of the Regression-Discontinuity Design in R. *Journal*  
20 *of Educational and Behavioral Statistics*, 42(3):341–360, 2017.
- 21  
22 [29] T. S. Breusch. Testing for Autocorrelation in Dynamic Linear Models. *Australian Economic Papers*, 17:334–  
23 335, 1978.
- 24  
25 [30] L. G. Godfrey. Testing Against General Autoregressive and Moving Average Error Models when the  
26 Regressors Include Lagged Dependent Variables. *Econometrica*, 46:1293–1301, 1978.
- 27  
28 [31] Newey W. K. and K. D. West. A Simple, Positive-Definite, Heteroskedasticity and Autocorrelation Consistent  
29 Covariance Matrix. *Econometrica*, 55:703–708, 1987.
- 30  
31 [32] T. S. Breusch and A. R. Pagan. A Simple Test for Heteroskedasticity and Random Coefficient Variation.  
32 *Econometrica*, 47(5):1287–1294, 1979.
- 33  
34 [33] J. G. MacKinnon and H. White. Some Heteroskedasticity-Consistent Covariance Matrix Estimators with  
35 Improved Finite Sample Properties. *Journal of Econometrics*, 29:305–325, 1985.
- 36  
37 [34] DiCiccio, T. J., Efron, B. Bootstrap confidence intervals. *Statistical Science* 11 (3), 189–228, 1996.
- 38  
39 [35] Efron, B., 1987. Better bootstrap confidence intervals. *Journal of the American Statistical Association* 82 (397),  
40 171–185.
- 41  
42 [36] Heather Ward, Ronan Lyons, and Roselle Thoreau. Under-reporting of Road Casualties – Phase 1. Technical  
43 Report Road Safety Research Report No. 69, 2006.
- 44  
45  
46  
47  
48  
49  
50  
51  
52  
53  
54  
55  
56  
57  
58  
59  
60

1  
2  
3  
4  
5  
6  
7 **Figure 1 notes**  
8

9 Values on the x-axis refer to Eastings bands, and values on the y-axis refer to Northings bands.  
10 The two letters in each grid square refer to specific locations on the UK National Grid; the exact  
11 naming of each square can be found at Ordnance Survey [22].  
12  
13  
14  
15  
16  
17  
18  
19  
20  
21  
22  
23  
24  
25  
26  
27  
28  
29  
30  
31  
32  
33  
34  
35  
36  
37  
38  
39  
40  
41  
42  
43  
44  
45  
46  
47  
48  
49  
50  
51  
52  
53  
54  
55  
56  
57  
58  
59  
60

For peer review only

|    |    |    |    |    |    |    |
|----|----|----|----|----|----|----|
|    |    |    | HO | HP |    |    |
|    |    |    | HT | HU |    |    |
|    | HW | HX | HY | HZ |    |    |
| NA | NB | NC | ND | NE |    |    |
| NF | NG | NH | NJ | NK |    |    |
| NL | NM | NN | NO | NP |    |    |
|    | NR | NS | NT | NU |    |    |
|    | NW | NX | NY | NZ | OV |    |
|    |    | SC | SD | SE | TA |    |
|    |    | SH | SJ | SK | TF | TG |
|    | SM | SN | SO | SP | TL | TM |
|    | SR | SS | ST | SU | TQ | TR |
|    | SV | SW | SX | SY | SZ | TV |

Figure 1: Definition of Northing and Eastings bands in Great Britain (adapted from Ordnance Survey [20], not to scale).

91x133mm (96 x 96 DPI)

```
1
2
3 #Script for RDD in time modelling for time period DST models, with specification checks on:
4   #Autocorrelation of error term up to lag 10, Newey–West errors applied if present
5   #Heteroskedasticity, HC3 errors applied if present
6   #Specification checks of polynomial order of forcing variable (i.e. time); BIC is used to judge performance though
7 other indicators also output
8   #Specification checks by varying bandwidth for linear models
9
10 #attach packages
11 library(data.table)
12 library(DescTools)
13 library(rdrobust)
14 library(sandwich)
15 library(lmtest)
16
17 #set working directory
18 setwd("~/Documents/DST")
19
20 #Define sequences of data sets
21 #The STATS19 data have been segmented into separate files representing 7 easting and 13 northing bands and 1
22 aggregate data set (21 files in total)
23 #Datasets are named with same text prefix "data_", different numerical suffix "i"
24 #We define the sequence of datasets as seq_i, which refers to the 21 segmented datasets described above
25 #We define seq_t as the sequence of time periods ranging from 1 to 5
26 #The functions will iterate through all sequences and output results tables with all models' results
27 seq_i<-c(1:21)
28 seq_t<-c(1:5)
29
30 #Define functions:
31 #inputparams function calculates optimal bandwidth from rdrobust package; outputs from this are used in subsequent
32 polynomial and bandwidth trials
33 #rdd_calcs_poly function performs RDD with optimal bandwidth, and trials different polynomials for time
34 #rdd_calcs_bw function trials RDD with different bandwidths for linear in time form
35
36 inputparams<-function(i,t){
37
38   #compute bandwidth
39   data_model<-data
```

```

1
2
3 cols<-c("dow", "year")
4 data_model<-data_model[, (cols):=lapply(.SD, as.factor), .SDcols=cols]
5 tryCatch(
6   expr = bw<-rdbwselect(y=data_model$tot_casualties, x=data_model$time_variable_tp,
7     covs=cbind(data_model$year,data_model$dow)),
8   error = function(e) NULL
9 )
10 if(exists("bw")==TRUE){
11   bw_exists=1
12   bwl=ceiling(bw$bws[[1]])
13   bwr=ceiling(bw$bws[[2]])
14   #tabulate
15   resultsline<-data.table(i,t,bwl,bwr,nrow(data_model),bw_exists)
16   names(resultsline)<-c("model_no","tp","bw_mainl","bw_mainr","n","bw_exists")
17 } else if (exists("bw")==FALSE){
18   resultsline<-data.table(i,t,0,0,0,0)
19   names(resultsline)<-c("model_no","tp","bw_mainl","bw_mainr","n","bw_exists")
20 }
21 return(resultsline)
22 }
23
24 rdd_calcs_poly<-function(i,t){
25   #extract bandwidth info
26   paras_i<-mod_paras[model_no==i & tp==t]
27   bwl=paras_i$bw_mainl
28   bwr=paras_i$bw_mainr
29   bwexists=paras_i$bw_exists
30   if (bwexists==1){
31     #prepare data: need wt, kt and ktpost variables (cutoff is when time_variable_tp=0)
32     data_model<-data[time_variable_tp>=-bwl & time_variable_tp<=bwr]
33     data_model<-data_model[time_variable_tp>=0, wt:=1]
34     data_model<-data_model[time_variable_tp<0, wt:=0]
35     mintp=-1*min(data_model$time_variable_tp)
36     interventiontp=mintp+1
37     data_model<-data_model[time_variable_tp<0,kt:=(interventiontp)+time_variable_tp]
38     data_model<-data_model[time_variable_tp>=0,kt:=mintp+time_variable_tp]
39     data_model<-data_model[time_variable_tp<0, ktpost:=0]
40
41
42
43
44
45
46

```



```
1
2
3 data_model<-data_model[time_variable_tp>=0, ktpost:=kt-interventiontp+1]
4
5 cols<-c("dow", "year")
6 data_model<-data_model[, (cols):=lapply(.SD, as.factor), .SDcols=cols]
7
8 rdd_polytrial<-function(j){
9
10   tryCatch(
11     expr=lm_rdd<-lm(tot_casualties ~ wt + poly(kt, degree=j) + poly(ktpost, degree=j) + dow + year,
12 data=data_model),
13     error=function(e) NULL
14   )
15   if(exists("lm_rdd")==TRUE){
16     #Breusch Godfrey autocorrelation test up to lag 10
17     for (l in c(1:10)){
18       tryCatch(
19         expr = assign(paste0("bgtest_",l), value=BreuschGodfreyTest(lm_rdd, order = l, order.by = data_model$kt,
20 type = "Chisq", data = data_model)),
21         error = function(e) NULL
22       )
23       tryCatch(
24         expr = assign(paste0("lag_",l), value=eval(parse(text=paste0("bgtest_",l,"$p.value")))),
25         error = function(e) NULL
26       )
27       tryCatch(
28         expr = assign(paste0("b",l),value=eval(parse(text=paste0("data.table(as.numeric(lag_",l,""),",",l,""))))),
29         error = function(e) NULL
30       )
31     }
32     tryCatch(
33       expr = bgtab<-rbind(b1,b2,b3,b4,b5,b6,b7,b8,b9,b10),
34       error = function(e) NULL
35     )
36     if (exists("bgtab")==FALSE){
37       lag_val=0
38     } else if (exists("bgtab")==TRUE){
39       bgtab_select<-bgtab[V1<=0.1]
40
41
42
43
44
45
46
```

```

1
2
3     if (nrow(bgtab_select)>=1){
4         lag_val=max(bgtab_select$V2)
5     } else if (lag_1>0.1){
6         lag_val=0
7     }
8 }
9 #Bruesch Pagan heteroskedasticity test
10 bp_pval=bptest(lm_rdd)$p.value
11 if (is.na(bp_pval)){
12     bp_pval=100
13 }
14 #adjust errors if needed to account for autocorrelation or heteroskedasticity
15 if (lag_val>0){
16     nw_vcov <- NeweyWest(lm_rdd, order.by = data_model$kt, data=data_model, lag = lag_val, prewhite = F,
17 adjust = T)
18     lmsum<-as.matrix(coeftest(lm_rdd, vcov = nw_vcov))
19     lm_sum<-lmsum[2,]
20 } else if (lag_val==0 & bp_pval<=0.1){
21     hc_vcov <- vcovHC(lm_rdd)
22     lmsum<-as.matrix(coeftest(lm_rdd, vcov = hc_vcov))
23     lm_sum<-lmsum[2,]
24 } else if (lag_val==0 & bp_pval>0.1){
25     lmsum<-as.matrix(summary(lm_rdd)$coefficients)
26     lm_sum<-lmsum[2,]
27 }
28
29 data_model_l<-data_model[time_variable_tp<0]
30 data_model_r<-data_model[time_variable_tp>=0]
31 totcas_l=sum(data_model_l$tot_casualties)
32 totcas_r=sum(data_model_r$tot_casualties)
33 n_year=length(unique(data_model$year))
34
35 resultsline<-
36 data.table(i,t,j,lm_sum[[1]],lm_sum[[2]],lm_sum[[4]],nrow(data_model),nrow(data_model_l),nrow(data_model_r),
37           as.numeric(bwl), as.numeric(bwr),as.numeric(lag_val),as.numeric(bp_pval),
38           summary(lm_rdd)$r.squared, summary(lm_rdd)$adj.r.squared, BIC(lm_rdd),
39 AIC(lm_rdd),totcas_l,totcas_r,n_year)
40
41
42
43
44
45
46

```

```

1
2
3     names(resultsline)<-c("model_no","tp","poly_deg","coef","se", "pval",
4 "n_tot","n_left","n_right","bw_l","bw_r","lag","bp_pval",
5     "rsq","adj_rsq","bic","aic","totcas_l","totcas_r","n_year")
6     return(resultsline)
7   }}
8   #run for polynomials order 1 to 4
9   results_table<-c()
10  for (j in 1:4){
11    calcs<-rdd_polytrial(j)
12    results_table<-rbind(calcs,results_table)
13  }
14  return(results_table)
15  }}
16
17 rdd_calcs_bw<-function(i,t){
18   #extract bandwidth info
19   paras_i<-mod_paras[model_no==i & tp==t]
20   bwl=paras_i$bw_mainl
21   bwr=paras_i$bw_mainr
22   bwexists=paras_i$bw_exists
23
24   if (bwexists==1){
25     rdd_bwtrial<-function(j){
26
27       #prepare data: need wt, kt and ktpost variables (cutoff is when time_variable_tp=0)
28       data_model<-data[time_variable_tp>=-(bwl+j) & time_variable_tp<=(bwr+j)]
29       data_model<-data_model[time_variable_tp>=0, wt:=1]
30       data_model<-data_model[time_variable_tp<0, wt:=0]
31       mintp=-1*min(data_model$time_variable_tp)
32       interventiontp=mintp+1
33       data_model<-data_model[time_variable_tp<0,kt:=(interventiontp)+time_variable_tp]
34       data_model<-data_model[time_variable_tp>=0,kt:=mintp+time_variable_tp]
35       data_model<-data_model[time_variable_tp<0, ktpost:=0]
36       data_model<-data_model[time_variable_tp>=0, ktpost:=kt-interventiontp+1]
37
38       cols<-c("dow", "year")
39       data_model<-data_model[, (cols):=lapply(.SD, as.factor), .SDcols=cols]
40
41
42
43
44
45
46

```

```

1
2
3
4     tryCatch(
5       expr=lm_rdd<-lm_rdd<-lm(tot_casualties ~ wt + poly(kt, degree=1) + poly(ktpost, degree=1) + year + dow,
6 data=data_model),
7       error=function(e) NULL
8     )
9     if(exists("lm_rdd")==TRUE){
10      #Breusch Godfrey autocorrelation test up to lag 10
11      for (l in c(1:10)){
12        tryCatch(
13          expr = assign(paste0("bgtest_",l), value=BreuschGodfreyTest(lm_rdd, order = l, order.by = data_model$kt,
14 type = "Chisq", data = data_model)),
15          error = function(e) NULL
16        )
17        tryCatch(
18          expr = assign(paste0("lag_",l), value=eval(parse(text=paste0("bgtest_",l,"$p.value")))),
19          error = function(e) NULL
20        )
21        tryCatch(
22          expr = assign(paste0("b",l),value=eval(parse(text=paste0("data.table(as.numeric(lag_",l,"),"",l,""))))),
23          error = function(e) NULL
24        )
25      }
26      tryCatch(
27        expr = bgtab<-rbind(b1,b2,b3,b4,b5,b6,b7,b8,b9,b10),
28        error = function(e) NULL
29      )
30      if (exists("bgtab")==FALSE){
31        lag_val=0
32      } else if (exists("bgtab")==TRUE){
33        bgtab_select<-bgtab[V1<=0.1]
34        if (nrow(bgtab_select)>=1){
35          lag_val=max(bgtab_select$V2)
36        } else if (lag_1>0.1){
37          lag_val=0
38        }
39      }
40
41
42
43
44
45
46

```

```

1
2
3     #Bruesch Pagan heteroskedasticity test
4     bp_pval=bptest(lm_rdd)$p.value
5     if (is.na(bp_pval)){
6         bp_pval=100
7     }
8     #adjust errors if needed to account for autocorrelation or heteroskedasticity
9     if (lag_val>0){
10        nw_vcov <- NeweyWest(lm_rdd, order.by = data_model$kt, data=data_model, lag = lag_val, prewhite = F,
11    adjust = T)
12        lmsum<-as.matrix(coeftest(lm_rdd, vcov = nw_vcov))
13        lm_sum<-lmsum[2,]
14    } else if (lag_val==0 & bp_pval<=0.1){
15        hc_vcov <- vcovHC(lm_rdd)
16        lmsum<-as.matrix(coeftest(lm_rdd, vcov = hc_vcov))
17        lm_sum<-lmsum[2,]
18    } else if (lag_val==0 & bp_pval>0.1){
19        lmsum<-as.matrix(summary(lm_rdd)$coefficients)
20        lm_sum<-lmsum[2,]
21    }
22
23    data_model_l<-data_model[time_variable_tp<0]
24    data_model_r<-data_model[time_variable_tp>=0]
25    totcas_l=sum(data_model_l$tot_casualties)
26    totcas_r=sum(data_model_r$tot_casualties)
27    n_year=length(unique(data_model$year))
28
29    resultslines<-
30    data.table(i,t,j,lm_sum[[1]],lm_sum[[2]],lm_sum[[4]],nrow(data_model),nrow(data_model_l),nrow(data_model_r),
31              as.numeric(bwl+j),as.numeric(bwr+j),as.numeric(lag_val),as.numeric(bp_pval),
32              summary(lm_rdd)$r.squared, summary(lm_rdd)$adj.r.squared, BIC(lm_rdd),
33    AIC(lm_rdd),totcas_l,totcas_r,n_year)
34    names(resultslines)<-c("model_no","tp","bw_adjust","coef","se", "pval",
35    "n_tot","n_left","n_right","bw_l","bw_r","lag","bp_pval",
36    "rsq","adj_rsq","bic","aic","totcas_l","totcas_r","n_year")
37    return(resultslines)
38    }}
39
40
41
42
43
44
45
46

```

```
1
2
3     #run for different bandwidths as follows:
4     seq_bw<-c(1,0,-1)
5     results_table<-c()
6     for (j in seq_bw){
7         calcs<-rdd_bwtrial(j)
8         results_table<-rbind(calcs,results_table)
9     }
10    return(results_table)
11  }}
12
13
14 #Run functions and save output as csv files
15 param_table<-c()
16 for (i in seq_i){
17     for (t in seq_t){
18         data_raw<-eval(parse(text=paste0("data_",i)))
19         data<-data_raw[tp==t]
20         param_table<-rbind(param_table,inputparams(i,t))
21     }}
22 write.csv(param_table, file="model_params.csv", row.names=FALSE)
23
24 poly_table<-c()
25 for (i in seq_i){
26     for (t in seq_t){
27         data_raw<-eval(parse(text=paste0("data_",i)))
28         data<-data_raw[tp==t]
29         mod_paras<-fread("model_params.csv")
30         poly_table<-rbind(poly_table,rdd_calcs_poly(i,t))
31     }}
32 write.csv(poly_table, file="results_polytrial.csv", row.names=FALSE)
33
34 bw_table<-c()
35 for (i in seq_i){
36     for (t in seq_t){
37         data_raw<-eval(parse(text=paste0("data_",i)))
38         data<-data_raw[tp==t]
39         mod_paras<-fread("model_params.csv")
40
41
42
43
44
45
46
```

```
1
2
3     bw_table<-rbind(bw_table,rdd_calcs_bw(i,t))
4 }}
5 write.csv(bw_table, file="results_bwtrial.csv", row.names=FALSE)
6
7 #####
8 #Script for placebo tests as per Guido W. Imbens and Thomas Lemieux. Regression discontinuity designs: A guide to
9 practice. Journal of Econometrics, 142:615–635, 2008.
10 #We use the same bandwidth as per the associated original models in file "model_params.csv" as generated in script
11 "rdd_models.R"
12
13 #attach packages
14 library(data.table)
15 library(DescTools)
16 library(rdrobust)
17 library(sandwich)
18 library(lmtest)
19
20 #set working directory
21 setwd("~/Documents/DST")
22
23 #Define sequences of data sets
24 #The STATS19 data have been segmented into separate files representing 7 easting and 13 northing bands and 1
25 aggregate data set (21 files in total)
26 #Datasets are named with same text prefix "data_", different numerical suffix "i"
27 #We define the sequence of datasets as seq_i, which refers to the 21 segmented datasets described above
28 #We define seq_q so that we can split each data set into pre- ("left") and post- ("right") DST for 2 placebo tests
29 per original model
30 #We define seq_t as the sequence of time periods ranging from 1 to 5
31 #The functions will iterate through all sequences and output results tables with all models' results
32 seq_i<-c(1:21)
33 seq_q<-c("left","right")
34 seq_t<-c(1:5)
35
36 #Define functions:
37 #rdd_calcs_poly function performs RDD with optimal bandwidth, and trials different polynomials for time
38 #rdd_calcs_bw function trials RDD with different bandwidths for linear in time form
39
40
41
42
43
44
45
46
```

```

1
2
3 rdd_calcs_poly<-function(i,q,t){
4   #extract bandwidth info
5   paras_iq<-mod_paras[model_no==i & tp==t]
6   bwl=paras_iq$bw_mainl
7   bwr=paras_iq$bw_mainr
8   bwexists=paras_iq$bw_exists
9
10  if (bwexists==1){
11    #prepare data: need wt, kt and ktpost variables
12    data_model<-data[time_variable_tp>=cut-bwl & time_variable_tp<cut+bwr]
13    data_model<-data_model[time_variable_tp>=cut, wt:=1]
14    data_model<-data_model[time_variable_tp<cut, wt:=0]
15    mintp=min(data_model$time_variable_tp)
16    interventiontp=abs(mintp)+1
17    data_model<-data_model[,kt:=interventiontp+time_variable_tp]
18    data_model<-data_model[wt==0, ktpost:=0]
19    maxkt_wt0=max(data_model[wt==0]$kt)
20    data_model<-data_model[wt==1, ktpost:=kt-maxkt_wt0]
21
22    cols<-c("dow", "year")
23    data_model<-data_model[, (cols):=lapply(.SD, as.factor), .SDcols=cols]
24
25    rdd_polytrial<-function(j){
26
27      tryCatch(
28        expr=lm_rdd<-lm(tot_casualties ~ wt + poly(kt, degree=j) + poly(ktpost, degree=j) + dow + year,
29          data=data_model),
30        error=function(e) NULL
31      )
32      if(exists("lm_rdd")==TRUE){
33        #Breusch Godfrey autocorrelation test up to lag 10
34        for (l in c(1:10)){
35          tryCatch(
36            expr = assign(paste0("bgtest_",l), value=BreuschGodfreyTest(lm_rdd, order = l, order.by = data_model$kt,
37              type = "Chisq", data = data_model)),
38            error = function(e) NULL
39          )
40
41
42
43
44
45
46

```



```

1
2
3     tryCatch(
4       expr = assign(paste0("lag_",l), value=eval(parse(text=paste0("bgtest_",l,"$p.value")))),
5       error = function(e) NULL
6     )
7     tryCatch(
8       expr = assign(paste0("b",l),value=eval(parse(text=paste0("data.table(as.numeric(lag_",l,""),",",l,""))))),
9       error = function(e) NULL
10    )
11  }
12  tryCatch(
13    expr = bgtab<-rbind(b1,b2,b3,b4,b5,b6,b7,b8,b9,b10),
14    error = function(e) NULL
15  )
16  if (exists("bgtab")==FALSE){
17    lag_val=0
18  } else if (exists("bgtab")==TRUE){
19    bgtab_select<-bgtab[V1<=0.1]
20    if (nrow(bgtab_select)>=1){
21      lag_val=max(bgtab_select$V2)
22    } else if (lag_1>0.1){
23      lag_val=0
24    }
25  }
26  #Bruesch Pagan heteroskedasticity test
27  bp_pval=bptest(lm_rdd)$p.value
28  if (is.na(bp_pval)){
29    bp_pval=100
30  }
31  #adjust errors if needed to account for autocorrelation or heteroskedasticity
32  if (lag_val>0){
33    nw_vcov <- NeweyWest(lm_rdd, order.by = data_model$kt, data=data_model, lag = lag_val, prewhite = F,
34  adjust = T)
35    lmsum<-as.matrix(coeftest(lm_rdd, vcov = nw_vcov))
36    lm_sum<-lmsum[2,]
37  } else if (lag_val==0 & bp_pval<=0.1){
38    hc_vcov <- vcovHC(lm_rdd)
39    lmsum<-as.matrix(coeftest(lm_rdd, vcov = hc_vcov))
40
41
42
43
44
45
46

```

```

1
2
3     lm_sum<-lmsum[2,]
4 } else if (lag_val==0 & bp_pval>0.1){
5     lmsum<-as.matrix(summary(lm_rdd)$coefficients)
6     lm_sum<-lmsum[2,]
7 }
8
9     data_model_l<-data_model[wt==0]
10    data_model_r<-data_model[wt==1]
11
12    resultsline<-
13 data.table(i,q,t,j,lm_sum[[1]],lm_sum[[2]],lm_sum[[4]],nrow(data_model),nrow(data_model_l),nrow(data_model_r),
14            as.numeric(bwl),as.numeric(bwr),as.numeric(lag_val),as.numeric(bp_pval),
15            summary(lm_rdd)$r.squared, summary(lm_rdd)$adj.r.squared, BIC(lm_rdd), AIC(lm_rdd))
16    names(resultsline)<-c("model_no","data","tp","poly_deg","coef","se", "pval",
17 "n_tot","n_left","n_right","bw_l","bw_r","lag","bp_pval",
18 "rsq","adj_rsq","bic","aic")
19    return(resultsline)
20  }}
21  #run for polynomials order 1 to 4
22  results_table<-c()
23  for (j in 1:4){
24    calcs<-rdd_polytrial(j)
25    results_table<-rbind(calcs,results_table)
26  }
27  return(results_table)
28  }}
29
30 rdd_calcs_bw<-function(i,q,t){
31   #extract bandwidth info
32   paras_iq<-mod_paras[model_no==i & tp==t]
33   bwl=paras_iq$bw_mainl
34   bwr=paras_iq$bw_mainr
35   bwexists=paras_iq$bw_exists
36
37   if (bwexists==1){
38     rdd_bwtrial<-function(j){
39
40
41
42
43
44
45
46

```

```

1
2
3 #prepare data: need wt, kt and ktpost variables
4 newcut=cut+j
5 data_model<-data[time_variable_tp>=newcut-bwl & time_variable_tp<newcut+bwr]
6 data_model<-data_model[time_variable_tp>=newcut, wt:=1]
7 data_model<-data_model[time_variable_tp<newcut, wt:=0]
8 mintp=min(data_model$time_variable_tp)
9 interventiontp=abs(mintp)+1
10 data_model<-data_model[,kt:=interventiontp+time_variable_tp]
11 data_model<-data_model[wt==0, ktpost:=0]
12 maxkt_wt0=max(data_model[wt==0]$kt)
13 data_model<-data_model[wt==1, ktpost:=kt-maxkt_wt0]
14
15 cols<-c("dow", "year")
16 data_model<-data_model[, (cols):=lapply(.SD, as.factor), .SDcols=cols]
17
18 tryCatch(
19   expr=lm_rdd<-lm_rdd<-lm(tot_casualties ~ wt + poly(kt, degree=1) + poly(ktpost, degree=1) + dow + year,
20 data=data_model),
21   error=function(e) NULL
22 )
23 if(exists("lm_rdd")==TRUE){
24   #Breusch Godfrey autocorrelation test up to lag 10
25   for (l in c(1:10)){
26     tryCatch(
27       expr = assign(paste0("bgtest_",l), value=BreuschGodfreyTest(lm_rdd, order = l, order.by = data_model$kt,
28 type = "Chisq", data = data_model)),
29       error = function(e) NULL
30     )
31     tryCatch(
32       expr = assign(paste0("lag_",l), value=eval(parse(text=paste0("bgtest_",l,"$p.value")))),
33       error = function(e) NULL
34     )
35     tryCatch(
36       expr = assign(paste0("b",l),value=eval(parse(text=paste0("data.table(as.numeric(lag_",l,","),",",l,""))))),
37       error = function(e) NULL
38     )
39   }
40
41
42
43
44
45
46

```

```
1
2
3   tryCatch(
4     expr = bgtab<-rbind(b1,b2,b3,b4,b5,b6,b7,b8,b9,b10),
5     error = function(e) NULL
6   )
7   if (exists("bgtab")==FALSE){
8     lag_val=0
9   } else if (exists("bgtab")==TRUE){
10    bgtab_select<-bgtab[V1<=0.1]
11    if (nrow(bgtab_select)>=1){
12      lag_val=max(bgtab_select$V2)
13    } else if (lag_1>0.1){
14      lag_val=0
15    }
16  }
17  #Bruesch Pagan heteroskedasticity test
18  bp_pval=bptest(lm_rdd)$p.value
19  if (is.na(bp_pval)){
20    bp_pval=100
21  }
22  #adjust errors if needed to account for autocorrelation or heteroskedasticity
23  if (lag_val>0){
24    nw_vcov <- NeweyWest(lm_rdd, order.by = data_model$kt, data=data_model, lag = lag_val, prewhite = F,
25  adjust = T)
26    lmsum<-as.matrix(coeftest(lm_rdd, vcov = nw_vcov))
27    lm_sum<-lmsum[2,]
28  } else if (lag_val==0 & bp_pval<=0.1){
29    hc_vcov <- vcovHC(lm_rdd)
30    lmsum<-as.matrix(coeftest(lm_rdd, vcov = hc_vcov))
31    lm_sum<-lmsum[2,]
32  } else if (lag_val==0 & bp_pval>0.1){
33    lmsum<-as.matrix(summary(lm_rdd)$coefficients)
34    lm_sum<-lmsum[2,]
35  }
36
37  data_model_l<-data_model[wt==0]
38  data_model_r<-data_model[wt==1]
39
40
41
42
43
44
45
46
```

```

1
2
3     resultsline<-
4 data.table(i,q,t,j,lm_sum[[1]],lm_sum[[2]],lm_sum[[4]],nrow(data_model),nrow(data_model_l),nrow(data_model_r),
5             as.numeric(bwl+j),as.numeric(bwr+j),as.numeric(lag_val),as.numeric(bp_pval),
6             summary(lm_rdd)$r.squared, summary(lm_rdd)$adj.r.squared, BIC(lm_rdd), AIC(lm_rdd))
7     names(resultsline)<-c("model_no","data","tp","bw_adjust","coef","se", "pval",
8 "n_tot","n_left","n_right","bw_l","bw_r","lag","bp_pval",
9             "rsq","adj_rsq","bic","aic")
10    return(resultsline)
11  }}
12
13  #run for different bandwidths as follows:
14  seq_bw<-c(1,0,-1)
15  results_table<-c()
16  for (j in seq_bw){
17    calcs<-rdd_bwtrial(j)
18    results_table<-rbind(calcs,results_table)
19  }
20  return(results_table)
21  }}
22
23
24  #Run functions and save output as csv files
25  poly_table<-c()
26  for (i in seq_i){
27    for (q in seq_q){
28      for (t in seq_t){
29        data_raw<-eval(parse(text=paste0("data_",i)))
30        data_tp<-data_raw[tp==t]
31        if (q=="left"){
32          data<-data_tp[time_variable_tp<0]
33          cut=round(mean(data$time_variable_tp))
34        } else if (q=="right"){
35          data<-data_tp[time_variable_tp>=0]
36          cut=round(mean(data$time_variable_tp))
37        }
38        mod_paras<-fread("model_params.csv")
39        poly_table<-rbind(poly_table,rdd_calcs_poly(i,q,t))
40
41
42
43
44
45
46

```

```
1
2
3   }}}
4 write.csv(poly_table, file="results_placebo_polytrial.csv", row.names=FALSE)
5
6 bw_table<-c()
7 for (i in seq_i){
8   for (q in seq_q){
9     for (t in seq_t){
10      data_raw<-eval(parse(text=paste0("data_",i)))
11      data_tp<-data_raw[tp==t]
12      if (q=="left"){
13        data<-data_tp[time_variable_tp<0]
14        cut=round(mean(data$time_variable_tp))
15      } else if (q=="right"){
16        data<-data_tp[time_variable_tp>=0]
17        cut=round(mean(data$time_variable_tp))
18      }
19      mod_paras<-fread("model_params.csv")
20      bw_table<-rbind(bw_table,rdd_calcs_bw(i,t))
21    }}}
22 write.csv(bw_table, file="results_placebo_bwtrial.csv", row.names=FALSE)
23
24
25
26
27
28
29
30
31
32
33
34
35
36
37
38
39
40
41
42
43
44
45
46
```

## STROBE Statement—checklist of items that should be included in reports of observational studies

|                              | Item No | Recommendation                                                                                                                                                                                                                                                                                                                                                                                                                                                         | Page No |
|------------------------------|---------|------------------------------------------------------------------------------------------------------------------------------------------------------------------------------------------------------------------------------------------------------------------------------------------------------------------------------------------------------------------------------------------------------------------------------------------------------------------------|---------|
| <b>Title and abstract</b>    | 1       | (a) Indicate the study's design with a commonly used term in the title or the abstract                                                                                                                                                                                                                                                                                                                                                                                 | 1       |
|                              |         | (b) Provide in the abstract an informative and balanced summary of what was done and what was found                                                                                                                                                                                                                                                                                                                                                                    | 1       |
| <b>Introduction</b>          |         |                                                                                                                                                                                                                                                                                                                                                                                                                                                                        |         |
| Background/rationale         | 2       | Explain the scientific background and rationale for the investigation being reported                                                                                                                                                                                                                                                                                                                                                                                   | 2-3     |
| Objectives                   | 3       | State specific objectives, including any prespecified hypotheses                                                                                                                                                                                                                                                                                                                                                                                                       | 3       |
| <b>Methods</b>               |         |                                                                                                                                                                                                                                                                                                                                                                                                                                                                        |         |
| Study design                 | 4       | Present key elements of study design early in the paper                                                                                                                                                                                                                                                                                                                                                                                                                | 3-6     |
| Setting                      | 5       | Describe the setting, locations, and relevant dates, including periods of recruitment, exposure, follow-up, and data collection                                                                                                                                                                                                                                                                                                                                        | 3-4     |
| Participants                 | 6       | (a) <i>Cohort study</i> —Give the eligibility criteria, and the sources and methods of selection of participants. Describe methods of follow-up<br><i>Case-control study</i> —Give the eligibility criteria, and the sources and methods of case ascertainment and control selection. Give the rationale for the choice of cases and controls<br><i>Cross-sectional study</i> —Give the eligibility criteria, and the sources and methods of selection of participants | NA      |
|                              |         | (b) <i>Cohort study</i> —For matched studies, give matching criteria and number of exposed and unexposed<br><i>Case-control study</i> —For matched studies, give matching criteria and the number of controls per case                                                                                                                                                                                                                                                 | NA      |
| Variables                    | 7       | Clearly define all outcomes, exposures, predictors, potential confounders, and effect modifiers. Give diagnostic criteria, if applicable                                                                                                                                                                                                                                                                                                                               | 5-6     |
| Data sources/<br>measurement | 8*      | For each variable of interest, give sources of data and details of methods of assessment (measurement). Describe comparability of assessment methods if there is more than one group                                                                                                                                                                                                                                                                                   | 3-6     |
| Bias                         | 9       | Describe any efforts to address potential sources of bias                                                                                                                                                                                                                                                                                                                                                                                                              | 5-6     |
| Study size                   | 10      | Explain how the study size was arrived at                                                                                                                                                                                                                                                                                                                                                                                                                              | 3-6     |
| Quantitative variables       | 11      | Explain how quantitative variables were handled in the analyses. If applicable, describe which groupings were chosen and why                                                                                                                                                                                                                                                                                                                                           | 5-6     |
| Statistical methods          | 12      | (a) Describe all statistical methods, including those used to control for confounding                                                                                                                                                                                                                                                                                                                                                                                  | 4-6     |
|                              |         | (b) Describe any methods used to examine subgroups and interactions                                                                                                                                                                                                                                                                                                                                                                                                    | 5-6     |
|                              |         | (c) Explain how missing data were addressed                                                                                                                                                                                                                                                                                                                                                                                                                            | 5       |
|                              |         | (d) <i>Cohort study</i> —If applicable, explain how loss to follow-up was addressed<br><i>Case-control study</i> —If applicable, explain how matching of cases and controls was addressed<br><i>Cross-sectional study</i> —If applicable, describe analytical methods taking account of sampling strategy                                                                                                                                                              | NA      |
|                              |         | (e) Describe any sensitivity analyses                                                                                                                                                                                                                                                                                                                                                                                                                                  | 6       |

Continued on next page

| <b>Results</b>           |     |                                                                                                                                                                                                              |       |
|--------------------------|-----|--------------------------------------------------------------------------------------------------------------------------------------------------------------------------------------------------------------|-------|
| Participants             | 13* | (a) Report numbers of individuals at each stage of study—eg numbers potentially eligible, examined for eligibility, confirmed eligible, included in the study, completing follow-up, and analysed            | NA    |
|                          |     | (b) Give reasons for non-participation at each stage                                                                                                                                                         | NA    |
|                          |     | (c) Consider use of a flow diagram                                                                                                                                                                           | NA    |
| Descriptive data         | 14* | (a) Give characteristics of study participants (eg demographic, clinical, social) and information on exposures and potential confounders                                                                     | NA    |
|                          |     | (b) Indicate number of participants with missing data for each variable of interest                                                                                                                          | NA    |
|                          |     | (c) <i>Cohort study</i> —Summarise follow-up time (eg, average and total amount)                                                                                                                             | NA    |
|                          |     | Note: No human/animal participants were involved but a summary of descriptive statistics on casualties is given                                                                                              | 4     |
| Outcome data             | 15* | <i>Cohort study</i> —Report numbers of outcome events or summary measures over time                                                                                                                          | NA    |
|                          |     | <i>Case-control study</i> —Report numbers in each exposure category, or summary measures of exposure                                                                                                         | NA    |
|                          |     | <i>Cross-sectional study</i> —Report numbers of outcome events or summary measures                                                                                                                           | NA    |
| Main results             | 16  | (a) Give unadjusted estimates and, if applicable, confounder-adjusted estimates and their precision (eg, 95% confidence interval). Make clear which confounders were adjusted for and why they were included | 6-9   |
|                          |     | (b) Report category boundaries when continuous variables were categorized                                                                                                                                    | 5-6   |
|                          |     | (c) If relevant, consider translating estimates of relative risk into absolute risk for a meaningful time period                                                                                             | NA    |
| Other analyses           | 17  | Report other analyses done—eg analyses of subgroups and interactions, and sensitivity analyses                                                                                                               | NA    |
| <b>Discussion</b>        |     |                                                                                                                                                                                                              |       |
| Key results              | 18  | Summarise key results with reference to study objectives                                                                                                                                                     | 11-15 |
| Limitations              | 19  | Discuss limitations of the study, taking into account sources of potential bias or imprecision. Discuss both direction and magnitude of any potential bias                                                   | 15    |
| Interpretation           | 20  | Give a cautious overall interpretation of results considering objectives, limitations, multiplicity of analyses, results from similar studies, and other relevant evidence                                   | 12-15 |
| Generalisability         | 21  | Discuss the generalisability (external validity) of the study results                                                                                                                                        | 15    |
| <b>Other information</b> |     |                                                                                                                                                                                                              |       |
| Funding                  | 22  | Give the source of funding and the role of the funders for the present study and, if applicable, for the original study on which the present article is based                                                | 17    |

\*Give information separately for cases and controls in case-control studies and, if applicable, for exposed and unexposed groups in cohort and cross-sectional studies.

**Note:** An Explanation and Elaboration article discusses each checklist item and gives methodological background and published examples of transparent reporting. The STROBE checklist is best used in conjunction with this article (freely available on the Web sites of PLoS Medicine at <http://www.plosmedicine.org/>, Annals of Internal Medicine at <http://www.annals.org/>, and Epidemiology at <http://www.epidem.com/>). Information on the STROBE Initiative is available at [www.strobe-statement.org](http://www.strobe-statement.org).



# BMJ Open

## Road traffic casualties in Great Britain at daylight savings time transitions: a causal regression discontinuity design analysis

|                                 |                                                                                                                            |
|---------------------------------|----------------------------------------------------------------------------------------------------------------------------|
| Journal:                        | <i>BMJ Open</i>                                                                                                            |
| Manuscript ID                   | bmjopen-2021-054678.R2                                                                                                     |
| Article Type:                   | Original research                                                                                                          |
| Date Submitted by the Author:   | 07-Mar-2022                                                                                                                |
| Complete List of Authors:       | Singh, Ramandeep; Imperial College London, Sood, Rohan; Imperial College London<br>Graham, Daniel; Imperial College London |
| <b>Primary Subject Heading</b>: | Public health                                                                                                              |
| Secondary Subject Heading:      | Research methods                                                                                                           |
| Keywords:                       | PUBLIC HEALTH, STATISTICS & RESEARCH METHODS, SLEEP MEDICINE                                                               |
|                                 |                                                                                                                            |

SCHOLARONE™  
Manuscripts



I, the Submitting Author has the right to grant and does grant on behalf of all authors of the Work (as defined in the below author licence), an exclusive licence and/or a non-exclusive licence for contributions from authors who are: i) UK Crown employees; ii) where BMJ has agreed a CC-BY licence shall apply, and/or iii) in accordance with the terms applicable for US Federal Government officers or employees acting as part of their official duties; on a worldwide, perpetual, irrevocable, royalty-free basis to BMJ Publishing Group Ltd ("BMJ") its licensees and where the relevant Journal is co-owned by BMJ to the co-owners of the Journal, to publish the Work in this journal and any other BMJ products and to exploit all rights, as set out in our [licence](#).

The Submitting Author accepts and understands that any supply made under these terms is made by BMJ to the Submitting Author unless you are acting as an employee on behalf of your employer or a postgraduate student of an affiliated institution which is paying any applicable article publishing charge ("APC") for Open Access articles. Where the Submitting Author wishes to make the Work available on an Open Access basis (and intends to pay the relevant APC), the terms of reuse of such Open Access shall be governed by a Creative Commons licence – details of these licences and which [Creative Commons](#) licence will apply to this Work are set out in our licence referred to above.

Other than as permitted in any relevant BMJ Author's Self Archiving Policies, I confirm this Work has not been accepted for publication elsewhere, is not being considered for publication elsewhere and does not duplicate material already published. I confirm all authors consent to publication of this Work and authorise the granting of this licence.

# Road traffic casualties in Great Britain at daylight savings time transitions: a causal regression discontinuity design analysis

Ramandeep Singh, Rohan Sood, Daniel J Graham<sup>1</sup>

*Transport Strategy Centre, Department of Civil and Environmental Engineering, Imperial College London  
Exhibition Road, London SW7 2AZ, United Kingdom*

## Abstract

**Objectives:** To determine whether daylight savings time (DST) transitions have an effect on road traffic casualties in Great Britain using causal regression discontinuity design analysis. We undertake aggregate and disaggregate spatial and temporal analyses to test the commonly referenced sleep and light hypotheses.

**Design:** The study takes the form of a natural experiment in which the DST transitions are interventions to be evaluated. Two outcomes are tested: (i) the total number of casualties of all severities (ii) the number of fatalities.

**Data:** Data are obtained from the UK Department for Transport STATS19 database. Over a period of 14 years between 2005 and 2018, 311,766 total casualties and 5,429 fatalities occurred 3 weeks either side of the Spring DST transition and 367,291 total casualties and 6,650 fatalities occurred 3 weeks either side of the Autumn DST transition.

**Primary outcome measure:** A regression discontinuity design method (RDD) is applied. The presence of a causal effect is determined via the degree of statistical significance and magnitude of the average treatment effect.

**Results:** All significant average treatment effects are negative (54 significant models out of 287 estimated), indicating that there are fewer casualties following the transitions. Overall, bootstrapped summary statistics indicate a reduction of 0.75 in the number of fatalities (95% CI: -1.61, -0.04) and a reduction of 4.73 in the number of total casualties (95% CI: -6.08, -3.27) on average per year at both the Spring and Autumn DST transitions combined.

**Conclusions:** The results indicate minor reductions in the number of fatalities following the DST transitions, and thus our analysis does not support the most recent UK parliamentary estimate that there would be 30 fewer fatalities in Great Britain if DST were to be abolished. Furthermore, the results do not provide conclusive support for either the sleep or light hypotheses.

**Keywords:** Road safety, Daylight savings time, Sleep, Visibility, Regression discontinuity design

---

<sup>1</sup> Corresponding author

*Email address:* d.j.graham@imperial.ac.uk (Daniel J Graham)

### *Strengths and limitations of this study*

- We adopt a causal regression discontinuity design method to generate robust estimates of the impact of DST transitions on road traffic casualties and fatalities in Great Britain.
- We undertake both aggregate and disaggregate spatial and temporal analyses to investigate the impacts of sleep and light disruptions at the transitions.
- We account for potential confounding through the inclusion of seasonal variables at the level of year, day of week, and time of day, and treat heteroskedasticity and autocorrelation to account for unobserved confounders.
- Limitations include potential under-reporting of casualties in the Department for Transport STATS19 database, sparse data leading to estimation difficulties in the northernmost regions of Scotland, and the presence of potential additional unobserved confounders that could lead to biased estimates.

## **1. Introduction**

Since its introduction, the implementation of daylight savings time (DST) has been a contentious issue which has regained attention in recent times. In response to a public consultation held in 2018, the European Parliament in 2019 adopted a position to support the elimination of daylight savings in the European Union (EU), with plans for implementation in 2021 [1, 2]. The United Kingdom (UK) initiated an inquiry to analyse the impact of the EU change to “understand what factors should inform [the UK’s] approach” [3]. The UK also previously debated and ultimately rejected changes to daylight savings in the Daylight Saving Bill 2010-11, which proposed to shift UK time forward by one hour throughout the year to align with Central European Time (CET) [4]. A key argument in the elimination or alteration of daylight savings time is the impact that clock changes have on road safety. In both the academic literature and government parliamentary debates, two issues are highlighted as having an impact on road safety levels: (i) changes in daylight hours could impact alertness due to the required chronobiologic adjustments to the human circadian rhythm [1, 5, 6] - herein referred to as the ‘sleep hypothesis’, and (ii) changing of daylight hours could result in detrimental changes to visibility [7, 8, 4, 3] - herein referred to as the ‘light hypothesis’.

Evidence on the impact of DST transitions on road traffic casualties is currently inconclusive. In the 2010-2011 Daylight Saving Bill, it was argued that there would be 80 fewer fatalities on UK roads if the UK switched to CET [4]. In the more recent UK report on the proposed EU changes, it was stated that abolishing time changes and adopting a permanent move to UK Summer Time could result in 30 fewer fatalities [3]. However, it is unclear how these figures were generated and whether robust causal statistical analysis methods were adopted. In the academic literature, there is mixed consensus regarding the impact of DST transitions. Increases in road casualties are reported for studies undertaken in the US by Smith [9] and in New Zealand by Robb and Barnes [10], while reductions in casualties in the US are reported by Coate and Markowitz [11] and Crawley [12]. Lindenberger et al. [13] reports no significant impacts in their analysis of road casualties in Germany.

1  
2  
3  
4  
5  
6  
7 The aim of this paper is to estimate the causal effect of DST transitions on the number of  
8 road traffic casualties and fatalities in Great Britain. This paper contributes to the literature from  
9 several perspectives. First, the majority of studies adopt non-causal techniques to quantify the  
10 impact of DST transitions, including comparisons of descriptive statistics, linear regression  
11 based on ordinary least squares, and quasi-Poisson regression [10, 11, 13, 14, 15]. Two studies  
12 by Carey and Sarma [7] and Uttley and Fotios [16] adopt a causal regression discontinuity  
13 design (RDD) method similar to ours, however, the studies focus on road casualties in the USA  
14 and pedestrian casualties in the UK, respectively. We therefore contribute to the literature by  
15 adopting a causal RDD method to analyse road traffic casualties in Great Britain, which, to our  
16 knowledge, has not been previously undertaken. Second, use of the RDD method with time as  
17 the forcing variable requires stringent specification tests to be undertaken to ensure that the  
18 models are free from potential confounding factors that can lead to biased estimates. In the  
19 literature on RDD methods applied to DST analyses, these specification tests are not typically  
20 performed. In our analysis, we follow the recommendations made in Hausman and Rapson [17]  
21 to test for model robustness. Finally, there are a number of studies in the UK and US indicating  
22 both causal and non-causal relationships between light levels and casualties at DST transitions  
23 [14,15,16,18,19], however, we are not aware of causal studies testing the sleep hypothesis at  
24 DST transitions. Therefore, in addition to a pooled analysis of Great Britain as a whole, we also  
25 undertake disaggregate spatial and temporal analyses to test the sleep and light hypotheses.  
26  
27  
28

## 29 **2. Methods**

### 30 *2.1. Study area and data*

31  
32 The STATS19 database produced by the Department for Transport is used to obtain records of  
33 road traffic accidents that resulted in personal injury in Great Britain between 2005 and 2018  
34 [dataset][20]. Casualties are defined as personal injuries of any severity as a result of an accident  
35 event. As specified in [21], a single accident event can be associated with more than one  
36 casualty. In this analysis, we focus on total casualties (all severities combined) and fatal  
37 casualties.  
38  
39

40  
41 Three week windows on either side of the DST transitions in Spring and Autumn are  
42 extracted from the total accident data set. Three weeks is chosen to provide enough data for the  
43 optimised local bandwidth to be calculated for each scenario as part of the RDD modelling. It  
44 should be noted that after calculation of the optimal bandwidth, the window around the DST  
45 transitions is likely to be much shorter than three weeks; further details on the optimal bandwidth  
46 calculations are given in Section 2.2. Through data cleaning, less than 0.02% of records have  
47 been removed as a result of missing observations in the fields representing latitude and longitude  
48 and accident event timestamps as well as records over Bank Holidays as these observations  
49 could potentially represent abnormal out-of-season traffic levels which could confound the  
50 baseline time trends before and after the DST transitions. The number of casualties and fatalities  
51 for all of Great Britain over three week windows either side of the transitions are summarised in  
52 Table 1. As shown in the table, there are increases in the number of casualties and fatalities after  
53 both transitions when considering 3 week windows before and after the transitions. Again, it  
54 should be noted that this study considers the impact on casualties in the immediate vicinity of the  
55 transition dates, and so the 3 week windows will shrink considerably after calculation of the  
56 optimal bandwidth around the transition dates for each model. Therefore, the general trend for  
57  
58  
59  
60

the aggregate 3 week windows showing more casualties after the transitions may not be applicable at shorter bandwidths.

Table 1: Number of casualties, aggregated over Great Britain over  $\pm 3$  week windows from DST transition dates

| Casualty severity | Spring     |           | Autumn     |           |
|-------------------|------------|-----------|------------|-----------|
|                   | Before DST | After DST | Before DST | After DST |
| Total casualties  | 153107     | 158659    | 175796     | 191495    |
| Fatal casualties  | 2517       | 2912      | 3211       | 3439      |

To investigate whether the DST transitions have different regional effects across Great Britain, National Ordnance Survey data are used to divide Great Britain into distinct bands based on latitude and longitude [22]. Using the Ordnance Survey Grid Reference (OSGR) variable within STATS19, each accident event and associated casualties are assigned a Northings band and an Eastings band.

## 2.2. Regression discontinuity design framework

DST is a policy enacted for the entire population of Great Britain and the treatment assignment is deterministic, i.e., there is no ambiguity in treated vs untreated observations. Therefore, the DST treatment imposed at the Spring and Autumn transitions is considered as a sharp discontinuity. Further information on RDD frameworks is presented in Imbens and Lemieux [23] and Lee and Lemieux [24].

In this analysis, we use spatio-temporal units where  $i$  refers to a given local area zone within Great Britain,  $t$  refers to a given time period, where each day is segmented into 5 time periods, and  $z$  refers to year. The assignment of the treatment, i.e. the imposition of the daylight savings transition, is solely dependent on the value of the forcing variable, time  $T$ , as follows:

$$W_{itz} = \begin{cases} 1 & \text{if } T_t \geq c \\ 0 & \text{if } T_t < c \end{cases} \quad (1)$$

where  $c$  is the treatment threshold, which is defined as the DST transition date, and  $W_{itz}$  is the binary treatment in the sharp RDD. In the Spring transition, the treatment is the imposition of Summer Time, while in the Autumn transition, the treatment is the return to GMT. Observations recorded between 00:00 and 01:00 in March and between 00:00 and 02:00 in October on the day of the transition are designated as non-treated in line with when the transition occurs. Over the analysis time period of 2005 to 2018, the transition dates for Spring range from 25 to 31 March and those for Autumn range from 25 to 31 October.

The observation of a discontinuity in the average treatment effect either side of the treatment threshold is evidence of a causal effect of the treatment [23, 24]. The average treatment effect for a sharp discontinuity  $\tau_{SRD}$  in time is defined as:

$$\tau_{SRD} = E[Y_{itz}(1) - Y_{itz}(0) | T_t = c] = \lim_{t \downarrow c} E[Y_{itz} | T_t = t] - \lim_{t \uparrow c} E[Y_{itz} | T_t = t] \quad (2)$$

where  $Y_{itz}(1)$  indicates the potential outcome when treatment is received and  $Y_{itz}(0)$  indicates the potential outcome when treatment is not received. The second equality holds assuming continuity of expectations in  $T$  i.e.  $E[Y_{itz}(0) | T_t = c] = \lim_{t \uparrow c} E[Y_{itz}(0) | T_t = t] = \lim_{t \uparrow c} E[Y_{itz} | T_t = t]$  [23].

Since the forcing variable is time, we follow the recommendations in Hausman and Rapson [17] to address potential specification issues. To ensure that there are enough observations in the vicinity of the treatment threshold, we segment daily data into 5 time periods, and the data are aggregated at a local area zone level which also provides cross-sectional variance at each time point. By segmenting the data to increase the number of observations close to the treatment threshold, we avoid the need to include observations further away from the threshold which can introduce bias from unobserved confounding variables. We account for potential bias from known confounding variables correlated with time through the inclusion of covariates representing potential seasonal variation in casualties. The covariates are year, day of the week, and the time period associated with each observation. Since the daylight savings transitions are universally applied at fixed transition dates, we do not anticipate issues arising from manipulation of treatment status. Further specification tests are undertaken to ensure validity of the design and these are discussed in section 2.3.

The data sets are arranged in a pseudo-panel form with indexes of local area zone and time period per year. The response variable is the sum of the number of casualties per local area zone and time period per year; in cases where no casualties are observed, a value of 0 is designated. For each of the Spring and Autumn transitions, two base regressions are undertaken as follows: (i) the total number of casualties of all severities, and (ii) the total number of fatalities. The two base regressions are run for three scenarios: (i) for Great Britain overall, (ii) for each Northing band in each time period, and (iii) for each Easting band in each time period. We adopt a local linear specification for the forcing variable of time. The bandwidth for the models is specified according to the conventional method of minimising the mean squared error (MSE) of the average treatment effect [25, 26, 27]. This selection procedure selects the shortest (i.e. local) bandwidth in the vicinity of the treatment threshold subject to the minimisation of the MSE, thus ensuring that the key assumption of random treatment is upheld. The optimal bandwidth selection process is considered superior to nominating an arbitrary bandwidth as was common in the earliest implementations of RDD as it is objective and data-driven rather than subjective [25]. The 'rdrobust' package in the R statistical analysis software is used for the optimal bandwidth calculation [27, 28].

The general equation for the aggregate model of Great Britain is given in equation 3. The regional and time of day analyses enable the investigation of the sleep and light hypotheses. It should be noted that in the disaggregate models, the time of day covariate in equation 3 is not included as the models are pre-segmented by time of day. All modelling has been undertaken using R statistical analysis software.

$$Y_{itz} = \alpha + \tau_{SRD}W_{itz} + \theta_1 K_{itz}(t) + \theta_2 K_{itz,post}(t) + \beta_1 X_{1z} + \beta_2 X_{2t} + \beta_3 X_{3t} + \varepsilon_{itz} \quad (3)$$

where  $Y_{itz}$  is the total number of casualties per local area zone  $i$  per time period  $t$  per year  $z$ ,  $W_{itz}$  is the treatment assignment indicator as previously defined,  $\tau_{SRD}$  is the average treatment effect of interest,  $K_{itz}(t)$  represents the average long term trend across the entire bandwidth i.e.

$K_{itz}(t) = t$ , and  $K_{itz,post}(t)$  is the time trend after the intervention where  $K_{itz,post}(t) = 0$ ,  $t < c$  and  $K_{itz,post}(t) = t - c + 1$ ,  $t \geq c$ . The categorical variables  $X_{1z}$ ,  $X_{2t}$ ,  $X_{3t}$  condition for year, day of the week, and time period, respectively. Year takes a value from 1 – 14 corresponding to the years 2005 – 2018. As coded in the STATS19 database, the day of the week takes a value 1 – 7 with 1 corresponding to Sunday and 7 corresponding to Saturday. The time of the day takes values as follows: Overnight = 1, AM Peak = 2, Inter Peak = 3, PM Peak = 4, Night = 5. The peak time periods follow the standards adopted by the Department for Transport: AM Peak (07:00 – 09:59), Inter Peak (10:00 – 15:59) and PM Peak (16:00 – 18:59) [18]. Two additional time-bins are added to complete a 24-hour period: Overnight (0:00 – 06:59) and Night (19:00 – 23:59).  $\alpha$  and  $\varepsilon_{itz}$  are the model constant and model random error term, respectively, where  $\varepsilon_{itz} \sim \mathcal{N}(0, \sigma_\varepsilon^2)$ .

It should be noted that the inclusion of group-specific fixed effects for local area zone was trialled to account for potential time-invariant cross-sectional differences. However, using the Bayesian Information Criterion (BIC) as an indicator of model performance, we found that a majority of models performed better with no local area zone effects compared to those with local area effects, and so these effects are not included in the final model form.

### 2.3. Specification tests

As recommended by Hausman and Rapson [17], we perform the following specification tests:

- Specification checks are performed for the bandwidth by varying the bandwidth within the vicinity of the optimal bandwidth and verifying that the magnitude and significance of average treatment effect remains consistent.
- Specification checks are performed for the polynomial order of the forcing variable of time. The BIC is used to judge model performance. Polynomials of up to degree 4 are tested, and we verify that the local linear specification performs best in line with the bandwidth selection procedure.
- The Breusch-Godfrey test [29, 30] is performed to test for autocorrelation of the error term for a lag value up to 10 (2 days). If autocorrelation is present, it is treated using Newey-West standard errors [31], which are heteroskedasticity and autocorrelation consistent (HAC).
- The Breusch-Pagan test [32] is performed to test for heteroskedasticity. If heteroskedasticity is present with no error term autocorrelation, it is treated with heteroskedasticity consistent (HC3) errors [33].
- We perform placebo tests as per the recommendations in [23] to verify the model specification. We partition the original data for each model at the DST cutoff to obtain two smaller data sets. We then calculate a placebo cutoff which is equivalent to the mean value of the running variable in each dataset. We perform two placebo tests for each original model by undertaking the RDD analysis for the placebo cutoffs before the DST cutoff and



after the DST cutoff. The original models pass the placebo test if both placebo models yield an insignificant average treatment effect.

Note: Autoregression of the dependent variable is not considered in this analysis, since the majority of casualties per local area zone do not occur in consecutive time periods.

The R code for the generation of the RDD models and all specification tests is provided as a Supplementary file.

#### 2.4. Patient and public involvement statement

Please note that no patients nor members of the public were involved in this study.

### 3. Results

The results for the aggregate Spring and Autumn RDD models are presented in Table 2. The results for the disaggregate spatial and temporal RDD analyses are presented in Tables 3 and 4. All results tables summarise cases where the RDD models have passed all specification tests as described in section 2.3, and the average treatment effect at the DST transition is significant at a minimum significance level of  $\alpha = 0.05$  ( $\geq 95\%$ ). A map of the corresponding Northing and Eastings bands is given in Figure 1. As shown in the figure, higher band numbers represent more northern and more eastern locations. For further information, we have additionally included plots for every significant model including the original observations and fitted values as a Supplementary file. We have generated two plots for each scenario: the first shows all data points including the extent of raw observations, and the second is zoomed in to highlight the time trends.

Table 2: Aggregate models of Great Britain - RDD results summary

| Transition | Location                | Casualty type  | BW              | $n$    | $Y_{before}$ | $Y_{after}$ | $\tau_{SRD}$      | % Change |
|------------|-------------------------|----------------|-----------------|--------|--------------|-------------|-------------------|----------|
| Spring     | Aggregate Great Britain | All casualties | 32              | 173888 | 32133        | 27842       | -0.075 (0.009)*** | 0.003%   |
|            |                         | Fatalities     | Not significant |        |              |             |                   |          |
| Autumn     | Aggregate Great Britain | All casualties | Not significant |        |              |             |                   |          |
|            |                         | Fatalities     | Not significant |        |              |             |                   |          |

Notes: Significance notation: p-values 0 '\*\*\*\*' 0.001 '\*\*\*' 0.01 '\*\*' 0.05 '.' 0.1 '.' 1. Standard errors in parentheses. BW refers to bandwidth in time period units,  $\tau_{SRD}$  refers to the sharp RDD average treatment effect due to DST transition.  $n$  is the total number of observations,  $Y_{before}$  and  $Y_{after}$  refer to the total number of casualties or fatalities before and after the cutoff, respectively

Table 3: Spring transition - disaggregate spatial and temporal models RDD results summary

| Location      | Band        | Time period | All Casualties |          |                           |                          |                   |          | Fatal |          |                           |                          |                  |          |
|---------------|-------------|-------------|----------------|----------|---------------------------|--------------------------|-------------------|----------|-------|----------|---------------------------|--------------------------|------------------|----------|
|               |             |             | BW             | <i>n</i> | <i>Y<sub>before</sub></i> | <i>Y<sub>after</sub></i> | $\tau_{SRD}$      | % Change | BW    | <i>n</i> | <i>Y<sub>before</sub></i> | <i>Y<sub>after</sub></i> | $\tau_{SRD}$     | % Change |
| Aggregate     |             | 1           | 22             | 27145    | 1260                      | 1507                     | -0.110 (0.024)*** | -0.12%   | 40    | 12744    | 133                       | 81                       | -0.067 (0.022)** | -0.70%   |
|               |             | 4           | 38             | 43472    | 6565                      | 6597                     | -0.059 (0.020)**  | -0.01%   |       |          |                           |                          |                  |          |
|               |             | 5           | 46             | 48906    | 6918                      | 4456                     | -0.130 (0.025)*** | -0.03%   |       |          |                           |                          |                  |          |
| Northing band | 1,000-2,000 | 1           | 28             | 9925     | 474                       | 591                      | -0.095 (0.034)**  | -0.28%   |       |          |                           |                          |                  |          |
|               |             | 3           | 36             | 15992    | 3880                      | 3623                     | -0.162 (0.042)*** | -0.06%   |       |          |                           |                          |                  |          |
|               |             | 4           | 38             | 16008    | 2350                      | 2343                     | -0.067 (0.029)*   | -0.04%   |       |          |                           |                          |                  |          |
|               |             | 5           | 48             | 17991    | 2606                      | 1610                     | -0.146 (0.041)*** | -0.08%   |       |          |                           |                          |                  |          |
|               | 2,000-3,000 | 3           | 74             | 19698    | 3182                      | 3346                     | -0.137 (0.047)**  | -0.06%   |       |          |                           |                          |                  |          |
|               | 3,000-4,000 | 1           | 34             | 8365     | 315                       | 340                      | -0.075 (0.035)*   | -0.33%   | 44    | 2648     | 25                        | 19                       | -0.046 (0.021)*  | -2.58%   |
|               |             | 3           | 64             | 14496    | 3197                      | 3044                     | -0.167 (0.063)**  | -0.07%   |       |          |                           |                          |                  |          |
| 5             |             | 52          | 13233          | 1342     | 1073                      | -0.086 (0.042)*          | -0.09%            |          |       |          |                           |                          |                  |          |
| Easting band  | 3,000-4,000 | 1           | 28             | 8370     | 324                       | 311                      | -0.148 (0.056)**  | -0.64%   | 62    | 4510     | 67                        | 34                       | -0.139 (0.055)*  | -2.89%   |
|               | 4,000-5,000 | 1           | 30             | 11814    | 522                       | 479                      | -0.069 (0.030)*   | -0.18%   |       |          |                           |                          |                  |          |
|               |             | 3           | 74             | 28000    | 6172                      | 6235                     | -0.171 (0.049)*** | -0.04%   |       |          |                           |                          |                  |          |
|               |             | 5           | 50             | 20000    | 2244                      | 1874                     | -0.083 (0.038)*   | -0.05%   |       |          |                           |                          |                  |          |
|               | 5,000-6,000 | 1           | 28             | 8530     | 428                       | 559                      | -0.104 (0.039)**  | -0.34%   |       |          |                           |                          |                  |          |
|               |             | 3           | 70             | 24066    | 5588                      | 5651                     | -0.090 (0.037)*   | -0.02%   |       |          |                           |                          |                  |          |
|               |             | 4           | 26             | 8565     | 1479                      | 848                      | -0.110 (0.045)*   | -0.10%   |       |          |                           |                          |                  |          |
| 5             |             | 44          | 15453          | 2235     | 1388                      | -0.149 (0.045)***        | -0.09%            |          |       |          |                           |                          |                  |          |

Notes: Significance notation: p-values 0 ‘\*\*\*’ 0.001 ‘\*\*’ 0.01 ‘\*’ 0.05 ‘.’ 0.1 ‘.’ 1. Standard errors in parentheses. BW refers to bandwidth in time period units, *n* is the total number of observations,  $\tau_{SRD}$  refers to the sharp RDD average treatment effect due to DST transition, *Y<sub>before</sub>* and *Y<sub>after</sub>* refer to the total number of casualties or fatalities before and after the cutoff, respectively, and time periods are as follows: 1-Overnight, 2-AM Peak, 3-Inter-peak, 4-PM Peak, 5-Night.

Table 4: Autumn transition - disaggregate spatial and temporal models RDD results summary

| Location      | Band        | Time period | All Casualties |          |                           |                          |                   |          | Fatal |          |                           |                          |                  |          |
|---------------|-------------|-------------|----------------|----------|---------------------------|--------------------------|-------------------|----------|-------|----------|---------------------------|--------------------------|------------------|----------|
|               |             |             | BW             | <i>n</i> | <i>Y<sub>before</sub></i> | <i>Y<sub>after</sub></i> | $\tau_{SRD}$      | % Change | BW    | <i>n</i> | <i>Y<sub>before</sub></i> | <i>Y<sub>after</sub></i> | $\tau_{SRD}$     | % Change |
| Aggregate     |             | 1           | 18             | 16197    | 1035                      | 1043                     | -0.096 (0.019)*** | -0.13%   | 38    | 13671    | 104                       | 97                       | -0.030 (0.012)*  | -0.40%   |
|               |             | 3           | 72             | 75642    | 20645                     | 20684                    | -0.101 (0.028)*** | -0.01%   |       |          |                           |                          |                  |          |
|               |             | 4           | 34             | 37821    | 7728                      | 5448                     | -0.077 (0.024)**  | -0.01%   |       |          |                           |                          |                  |          |
|               |             | 5           | 32             | 37821    | 7449                      | 3851                     | -0.231 (0.030)*** | -0.04%   | 60    | 24936    | 285                       | 282                      | -0.035 (0.016)*  | -0.17%   |
| Northing band | 0-1,000     | 1           | 38             | 2534     | 90                        | 53                       | -0.153 (0.058)**  | -2.38%   |       |          |                           |                          |                  |          |
|               |             | 5           | 64             | 5044     | 389                       | 297                      | -0.156 (0.062)*   | -0.56%   |       |          |                           |                          |                  |          |
|               | 1,000-2,000 | 1           | 24             | 10015    | 630                       | 572                      | -0.158 (0.036)*** | -0.35%   | 40    | 4888     | 50                        | 19                       | -0.052 (0.017)** | -1.45%   |
|               |             | 4           | 30             | 12048    | 1993                      | 1837                     | -0.129 (0.036)*** | -0.09%   |       |          |                           |                          |                  |          |
|               | 2,000-3,000 | 1           | 32             | 9695     | 408                       | 353                      | -0.112 (0.035)**  | -0.39%   |       |          |                           |                          |                  |          |
|               |             | 5           | 48             | 12708    | 1534                      | 891                      | -0.190 (0.058)**  | -0.17%   |       |          |                           |                          |                  |          |
|               | 3,000-4,000 | 1           | 26             | 6010     | 289                       | 265                      | -0.152 (0.045)*** | -0.74%   |       |          |                           |                          |                  |          |
|               |             | 4           | 40             | 9576     | 1475                      | 1540                     | -0.118 (0.042)**  | -0.11%   |       |          |                           |                          |                  |          |
|               | 5,000-6,000 | 2           | 48             | 3440     | 261                       | 309                      | -0.076 (0.031)*   | -0.41%   |       |          |                           |                          |                  |          |
|               | 7,000-8,000 | 5           | 70             | 1470     | 66                        | 69                       | -0.094 (0.045)*   | -1.84%   |       |          |                           |                          |                  |          |
| 8,000-9,000   | 1           | 56          | 583            | 34       | 27                        | -0.280 (0.097)**         | -11.53%           |          |       |          |                           |                          |                  |          |
|               | 5           | 66          | 793            | 89       | 51                        | -0.362 (0.128)**         | -5.69%            |          |       |          |                           |                          |                  |          |
| Easting band  | 1,000-2,000 | 1           | 64             | 1092     | 30                        | 20                       | -0.072 (0.036)*   | -3.34%   |       |          |                           |                          |                  |          |
|               | 2,000-3,000 | 3           |                |          |                           |                          |                   |          | 78    | 3210     | 26                        | 37                       | -0.056 (0.021)** | -3.00%   |
|               |             | 4           | 54             | 7018     | 853                       | 678                      | -0.091 (0.043)*   | -0.15%   |       |          |                           |                          |                  |          |
|               | 3,000-4,000 | 1           | 26             | 8195     | 411                       | 352                      | -0.136 (0.040)*** | -0.46%   |       |          |                           |                          |                  |          |
|               |             | 5           | 44             | 14985    | 2189                      | 1351                     | -0.222 (0.050)*** | -0.14%   |       |          |                           |                          |                  |          |
|               | 4,000-5,000 | 1           | 26             | 9825     | 498                       | 473                      | -0.129 (0.032)*** | -0.36%   |       |          |                           |                          |                  |          |
|               |             | 5           | 44             | 17874    | 2840                      | 1663                     | -0.252 (0.057)*** | -0.12%   |       |          |                           |                          |                  |          |
|               | 5,000-6,000 | 1           | 22             | 8525     | 566                       | 534                      | -0.187 (0.037)*** | -0.46%   | 44    | 4491     | 34                        | 12                       | -0.042 (0.014)** | -1.71%   |
|               |             | 4           | 34             | 12033    | 2397                      | 1532                     | -0.127 (0.039)**  | -0.07%   |       |          |                           |                          |                  |          |
|               | 6,000-7,000 | 5           | 48             | 15408    | 2853                      | 1807                     | -0.279 (0.056)*** | -0.14%   |       |          |                           |                          |                  |          |
| 5             |             | 42          | 2394           | 257      | 106                       | -0.191 (0.086)*          | -1.04%            |          |       |          |                           |                          |                  |          |

1  
2  
3  
4  
5  
6  
7  
8  
9  
10  
11  
12  
13  
14  
15  
16  
17  
18  
19  
20  
21  
22  
23  
24  
25  
26  
27  
28  
29  
30  
31  
32  
33  
34  
35  
36  
37  
38  
39  
40  
41  
42  
43  
44  
45  
46

Notes: Significance notation: p-values 0 ‘\*\*\*’ 0.001 ‘\*\*’ 0.01 ‘\*’ 0.05 ‘.’ 0.1 ‘.’ 1. Standard errors in parentheses. BW refers to bandwidth in time period units,  $n$  is the total number of observations,  $\tau_{SRD}$  refers to the sharp RDD average treatment effect due to DST transition,  $Y_{before}$  and  $Y_{after}$  refer to the total number of casualties or fatalities before and after the cutoff, respectively, and time periods are as follows: 1-Overnight, 2-AM Peak, 3-Inter-peak, 4-PM Peak, 5-Night.

For peer review only

### 3.1. Spring transition

As shown in the tables, all models with significant average treatment effects show a reduction in the number of casualties at the Spring transition. For the whole of Great Britain, approximately 0.075 (-0.003%) fewer total casualties are observed on average per year. The time of day models further indicate reductions in total casualties ranging from 0.06 to 0.13 fewer casualties per year across the overnight, PM peak, and night periods (in percentages, -0.01% to -0.03%). In terms of fatalities in isolation, there are 0.07 (-0.7%) fewer fatalities observed in the overnight period.

#### *Latitudinal analysis*

In the disaggregate models of Northing bands, there are significant reductions in total casualties in 3 out of 12 bands. The reductions range from approximately 0.07 to 0.17 fewer total casualties (-0.04% to -0.45%) per year in all time periods except the morning peak. In terms of fatalities, there are 0.05 fewer fatalities per year (-2.58%) in the overnight time period in band 3000-4000.

#### *Longitudinal analysis*

In the disaggregate models of Easting bands, there are significant effects in 3 out of 7 bands. There are approximately 0.07 to 0.17 fewer total casualties (-0.02% to -0.64%) observed in all time periods except the morning peak. For the fatality models, in band 3000-4000, there is a significant reduction of 0.14 fatalities (-2.89%) in the overnight time period.

### 3.2. Autumn transition

As with the Spring transition, in the Autumn transition, all models with significant average treatment effects report a reduction in casualties. Considering Great Britain as a whole, there are no significant effects. However, when splitting by time of day, there are reductions in total casualties in every time period except the morning peak ranging from 0.08 to 0.23 fewer total casualties on average per year (-0.01% to -0.13%). In terms of fatalities, there are 0.03 fewer fatalities (-0.40%) in the overnight time period and 0.04 fewer fatalities (-0.17%) in the night time period.

#### *Latitudinal analysis*

In the disaggregate models of Northing bands, there are significant effects in 7 out of 12 bands. The effects range from a 0.08 to 0.36 reduction in the total number of casualties (-0.09% to -11.53%), and all significant effects are observed across all time periods except the inter-peak. For fatalities, in band 1000-2000, there are 0.05 fewer fatalities (-1.45%) in the overnight time period.

### *Longitudinal analysis*

In the disaggregate models of Easting bands, 6 out of 7 bands report significant effects in the total number of casualties. All significant effects are negative and they are observed in all time periods except the inter-peak. The effects range from 0.07 to 0.28 fewer total casualties (-0.07% to -3.34%). For the fatality models, in band 2000-3000, there are 0.06 fewer fatalities (-3.00%) in the inter-peak, and in band 5000-6000, there are 0.04 fewer fatalities (-1.71%) in the overnight time period.

## **4. Discussion**

### *4.1. Pooled analysis of Great Britain*

When Great Britain is viewed as a whole regionally and without time segmentation, there is a statistically significant causal effect indicating a very minor reduction of 0.075 (0.003%) in the total number of casualties at the Spring DST transition. The average treatment effects in all other pooled analyses are insignificant at a minimum significance level of  $\geq 95\%$ .

When segmenting the data, there are further geographical zones and time periods with statistically significant average treatment effects. Our analyses therefore indicate that it is important to investigate the impacts of DST transitions at disaggregate spatial and temporal levels, as well as analysing the aggregate effects.

### *4.2. Spring transition*

At the Spring transition, clocks are moved forward one hour, resulting in an hour less sleep. The reduction in sleep could have an impact on road casualties throughout the day. In the morning, civil twilight sunrise times change from approximately 5-5:30am to 6-6:30am across Britain. There is an hour less sleep and mornings are darker by an hour before 6-6:30am. These conditions could result in a compounding effect of the sleep and light hypotheses, likely resulting in an increase in casualties. However, for all models with significant effects in the associated overnight period (from 12am-7am), there is a reduction in total casualties and fatalities, in opposition to the sleep and light hypotheses.

In terms of regional effects, in the most western locations of Great Britain, the sun rises approximately 23 minutes later than the most eastern locations. As the civil twilight sunrise times coincide with the beginning of the morning peak in traffic, there could be a possibility of more casualties in the darker western locations compared to the east. Furthermore, sunrise at the most southern locations occurs approximately 20 minutes after the most northern locations, and so there could be a possibility of more casualties in the south relative to the north. For the Northing and Easting time of day models, we do not observe a systematic pattern showing progressively more casualties in the west and south, thus we cannot provide conclusive support for the regional light hypothesis.

At the Spring transition, civil daylight occurs throughout the AM peak (7-10am), inter-peak (10am-4pm), and PM peak (4pm-7pm), and so the light hypothesis is not applicable in these time periods. The sleep hypothesis is applicable, and sleepiness could manifest throughout

1  
2  
3  
4  
5  
6  
7 the day, leading to potential increases in casualties. However, all models with significant effects  
8 in these time periods indicate reductions in total casualties, in opposition to the sleep hypothesis.

9 In the evening, civil twilight sunset times change from approximately 7-7:30pm to 8-  
10 8:30pm across Great Britain. There is an hour less sleep throughout the day, but evenings are  
11 lighter by an hour in the off-peak travel time after 7-7.30pm, therefore resulting in a potential  
12 conflict of the sleep and light hypotheses. In all significant models in the associated night time  
13 period (7pm-12am), there is a reduction in the total number of casualties. This result aligns with  
14 the light hypothesis but at the same time opposes the sleep hypothesis, however, it is not  
15 possible to disentangle the effects. In terms of regional effects of the light hypothesis, the most  
16 western locations experience sunset approximately 23 minutes after the most eastern locations,  
17 so there may be potential for increased casualties in the east compared to the west due to the  
18 light hypothesis, however, the results do not support this. There is minimal difference  
19 (approximately 10 minutes) between sunset times in the north and south, and so we do not  
20 anticipate substantial differences between these locations. In the analysis of northing bands,  
21 there are only two models with significant effects in the night time period which show similar  
22 reductions in total casualties, however, this does not provide substantial systematic evidence of  
23 support for the regional light hypothesis.  
24  
25  
26

### 27 *4.3. Autumn transition*

28  
29  
30 At the Autumn transition, clocks are moved back one hour, and this can lead to an hour  
31 more sleep. The increase in sleep could have an impact on road casualties throughout the day. In  
32 the morning, civil twilight sunrise times change from approximately 7-7:30am to 6-6:30am  
33 across Great Britain. There is an hour more sleep and mornings are lighter by an hour before the  
34 morning peak travel time, therefore compounding the sleep and light hypotheses and resulting in  
35 the most appropriate conditions for a reduction in casualties. For all models with significant  
36 effects in the associated overnight and AM peak periods, there are reductions in total casualties  
37 and fatalities. These results therefore support the compounded impact of the sleep and light  
38 hypotheses, though it is not possible to disentangle the individual impacts of the two hypotheses.  
39 In terms of regional impacts, the most eastern locations experience civil twilight sunrise  
40 approximately 23 minutes before the most western locations, and so eastern locations are  
41 expected to report greater reductions in casualties. Furthermore, the most southern locations  
42 experience sunrise approximately 21 minutes before the most northern locations and so southern  
43 locations are expected to report greater reductions in casualties. However, the results show  
44 minimal support for a systematic pattern that progressively shows a greater reduction in  
45 casualties towards the east and south in the overnight and AM periods, thus we cannot conclude  
46 conclusive support for the regional light hypothesis.  
47  
48

49 At the Autumn transition, civil daylight occurs throughout the inter-peak period (10-  
50 4pm), and so there are no anticipated effects from the light hypothesis. However, the sleep  
51 hypothesis could apply, as there is an extra hour of sleep gained throughout the day, potentially  
52 leading to a reduction in casualties. Indeed, for all models with significant effects in the inter-  
53 peak, there are reductions in total casualties and fatalities, thus supporting the sleep hypothesis.  
54

55 In the evenings, civil sunset times change from approximately 6-6:30pm to 5-5:30pm  
56 across Great Britain. There is an hour more sleep throughout the day but evenings are darker by  
57  
58  
59  
60

1  
2  
3  
4  
5  
6  
7 an hour during the PM peak of traffic. In this situation, there is a potential conflict between the  
8 sleep and light hypotheses. All models with significant effects in the PM peak period (4-7pm)  
9 report reductions in total casualties and fatalities. Therefore, the results support the sleep  
10 hypothesis but oppose the light hypothesis, however, it is not possible to disentangle the impacts  
11 of the two. In terms of regional effects, sunset in the most eastern locations occurs approximately  
12 24 minutes before sunset in the most western locations, and so we can expect more casualties in  
13 the east. Sunset in the most northern locations occurs approximately 13 minutes before sunset in  
14 the most southern locations. Though it is difficult to ascertain whether it is feasible to expect  
15 regional differences, it could be plausible to anticipate more casualties in the north. However, the  
16 northing and easting band models do not provide support for a systematic pattern that  
17 progressively shows a greater increase in casualties towards the east and north in the night  
18 period, thus the results do not support the regional light hypothesis.  
19  
20

#### 21 22 *4.4. Magnitude of impacts at DST transitions*

23  
24 In the Daylight Savings Bill 2010-2011, it was estimated that there would be 80 fewer fatalities  
25 if the UK followed CET time [4]. A more recent report on EU DST changes states that there  
26 would be 30 fewer fatalities as a result of eliminating DST transitions altogether [3].  
27

28 Overall, our analysis suggests that DST transitions have a minor positive impact rather  
29 than a detrimental impact on road traffic casualties and fatalities. All statistically significant  
30 models (54 models) report a negative average treatment effect, indicating a reduction in the  
31 number of casualties at the DST transitions. Over the 13 northings bands, 7 eastings bands, and  
32 aggregate models, we attempted to generate a total of 212 models for total casualties and  
33 fatalities, respectively. However, due to sparse data in several bands, a number of models were  
34 not able to be estimated; 167 were able to be estimated for total casualties and 120 were able to  
35 be estimated for fatalities. Of these, 46 out of 167 estimated models of total casualties have  
36 significant average treatment effects, and 8 out of 120 estimated models of fatalities have  
37 significant average treatment effects. A potential explanation for why there are fewer fatality  
38 models with a significant average treatment effect could be that there are relatively lower  
39 numbers of fatalities occurring either side of the DST threshold. Furthermore, we acknowledge  
40 that the models with insignificant average treatment effects indicate absence of evidence of a  
41 change in casualties/fatalities at the DST threshold rather than evidence of absence of a change  
42 in casualties/fatalities at the DST threshold.  
43  
44

45 We calculate the combined impact of the Spring and Autumn transitions on road  
46 casualties, and we generate associated 95% bootstrap confidence intervals using 10,000  
47 iterations as per the bias corrected and accelerated (BCa) bootstrap method [34, 35]. The statistic  
48 of interest that we bootstrap is calculated in two steps: (1) We sum all average treatment effects  
49 in the regional time of day models over the Spring and Autumn transitions combined. Two  
50 estimates are generated: one for Easting band segmentation and one for Northing band  
51 segmentation. (2) We calculate the mean of the Easting and Northing band values, and this is  
52 taken as the estimated combined number of casualties over the Spring and Autumn transitions.  
53 We perform this procedure for fatalities and total casualties separately.  
54

55 The bootstrapped values indicate a mean reduction of 0.75 in the number of fatalities on  
56 average per year with a 95% confidence interval ranging from -1.61 to -0.04 (reduction in  
57  
58  
59  
60



1  
2  
3  
4  
5  
6  
7 fatalities). Our analysis therefore reports minor reductions in fatalities at the DST transitions,  
8 rather than an increase of 30-80 fatalities as estimated in House of Lords [3] and Bennett [4].

9 Similarly, for the total number of casualties of all severities, a mean reduction of 4.73 in  
10 the number of total casualties is estimated on average per year with a 95% confidence interval  
11 ranging from -6.08 to -3.27 (reduction in the total number of casualties). Therefore, the results  
12 for casualties of all severities also question the predictions of DST effects reported in House of  
13 Lords [3] and Bennett [4].  
14

#### 15 16 *4.5. Limitations*

17  
18 One limitation of the RDD methodology is that is applicable to ex-post analyses and not suitable  
19 for making ex-ante predictions. Therefore, the results reflect the impact of DST transitions on  
20 road safety over the study period of 2005-2018, and it is difficult to generalise the results to  
21 predict the impact of potential DST changes in the future. However, we have no compelling  
22 reason to believe that the average treatment effect will change significantly over time.  
23

24 The data from the Department for Transport STATS19 database may also pose potential  
25 limitations, as the data are compiled from police reports. As a result, there could be potential  
26 under-reporting of casualties. One previous study estimated that the number of casualties  
27 classified as Serious could be under-reported by a factor of two [36]. Another data-related  
28 limitation is the sparse data in the northernmost regions of Scotland. Due to the limited number  
29 of observations, the RDD models reported high standard errors of the average treatment effect  
30 estimator and low statistical significance in these regions, and in some cases, estimates were not  
31 able to be computed. As such, in future work, either alternate data sources or alternate statistical  
32 analysis techniques for small sample data are recommended.  
33

34 In the interpretation of the results in Section 4.2 and 4.3, we identified instances of where  
35 the sleep and light hypotheses were in conflict, and it was not possible to disentangle and  
36 quantify the separate impacts of the two hypotheses on road casualties. We therefore recommend  
37 future work to investigate how to disentangle the two effects, with a potential solution involving  
38 gathering disaggregate data on sleeping patterns and conditioning for this in the models.  
39

40 Finally, it should be noted that we have addressed potential sources of bias by  
41 conditioning out exogeneous changes in traffic volumes which cannot be attributed to the DST  
42 transitions through the inclusion of seasonal year, day of week, and time of day variables along  
43 with treatment of heteroskedasticity and autocorrelation of the error term to account for potential  
44 unobserved confounders. However, there may be additional unobserved factors that we have not  
45 accounted for which may lead to potentially biased estimates. For example, we were not able to  
46 obtain a data set that identifies every school holiday in each local area zone nor were we able to  
47 obtain weather data at a time period level in each local area zone from 2005-2018. We  
48 acknowledge that this could lead to potentially biased values of the average treatment effect.  
49 However, we would also like to highlight that the bandwidths for each model are narrow around  
50 the cutoffs (the mean bandwidth across all models is 4.3 days either side of the transition), and  
51 the narrow windows would minimise the degree of systematic impacts from school holidays and  
52 weather effects.  
53  
54  
55  
56  
57  
58  
59  
60

## 5. Conclusion

In this paper, we find that DST transitions have only a minor positive impact on road casualties and fatalities. For total casualties, 46 out of 167 models have significant average treatment effects, while for fatalities 8 out of 120 models have significant effects. All models with a significant average treatment effect (54 models) report a negative effect, indicating a reduction in the number of casualties at the DST transitions.

Considering Great Britain as a whole, we find a significant effect indicating a minor 0.003% reduction in the total number of casualties in the Spring transition into DST. The average treatment effects in all other aggregate models are insignificant at a minimum significance level of  $\geq 95\%$ . When segmenting the data spatially and temporally, there are more models with statistically significant average treatment effects. This highlights the importance of investigating the impacts of DST transitions at a disaggregate level.

The disaggregate spatial and temporal models do not provide clear support or rejection of the sleep and light hypotheses at the transitions. At the Autumn transition, the temporal analyses indicate support for the compounded effect of the sleep and light hypotheses in the overnight and AM peak periods as well as support for the sleep hypothesis in the inter-peak period. For the remaining transitions, there is minimal support for the sleep and light hypotheses in both the temporal and regional analyses and in some cases, it is difficult to disentangle potential conflicts between the sleep and light hypotheses. In cases where the hypotheses are not supported, other factors such as driver behaviour and other socio-economic characteristics may be the main cause of the observed estimated changes.

In terms of policy impacts, the Daylight Savings Bill 2010-2011 estimates that 80 lives would be saved per year from transitioning to CET [4] and the report on EU DST changes estimates 30 lives saved per year as a result of abolishing DST altogether [3]. Our results question these figures. We apply a bias corrected and accelerated bootstrap with 10,000 iterations to estimate the total number of fatalities and casualties on average per year over the Spring and Autumn transitions combined. The bootstrapped values indicate a mean reduction of 0.75 in the number of fatalities (95% CI: -1.61, -0.04) and a mean reduction of 4.73 in the number of total casualties (95% CI: -6.08, -3.27) on average per year at both the Spring and Autumn DST transitions combined. The light hypothesis is the main driver for the Daylight Savings Bill, while both the sleep and light hypotheses are put forward in the recent report on abolishing DST altogether in the EU. However, as mentioned, we do not find definitive evidence to support the sleep and light hypotheses.

A number of areas for future work are recommended. In some cases, modelling was prohibited due to a lack of data in the north of Great Britain, and therefore it is suggested that alternate data sources or alternate statistical analysis techniques for small sample data are employed to ascertain the impact of DST transitions in these regions. We also recommend further work to disentangle the impacts of the sleep and light hypotheses in cases where the two are in conflict. In regions where the sleep and light hypotheses did not hold, further research to investigate the impact of other potentially influential socio-demographic factors could be undertaken. In this analysis, we considered all casualties across all socio-demographic groups. Further analyses could be undertaken to provide a more disaggregate characterisation of the impact of DST transitions, for example, segmenting casualties by age could assist in testing

whether DST transitions impact children walking to school as hypothesised in the Daylight Saving Bill 2010-11.

### Author contribution statement

The corresponding author attests that all listed authors meet authorship criteria and that no others meeting the criteria have been omitted.

### Author CRediT statement

Conceptualisation: DJ Graham; Data curation: R Sood; Methodology: DJ Graham, R Singh, R Sood; Formal analysis: R Singh, R Sood; Writing-original draft: R Singh, R Sood, DJ Graham; Writing-review and editing: R Singh, DJ Graham, R Sood; Supervision: DJ Graham; Funding acquisition: DJ Graham.

### Funding statement

This research received no specific grant from any funding agency in the public, commercial or not-for-profit sectors; the work was internally funded by the Transport Strategy Centre (TSC) at Imperial College London.

### Competing interests statement

None declared.

### Ethics approval statement

Ethics approval is not applicable as no human nor animal participants were involved in the study.

### Data availability statement

The data used in this study are available open-source from the Department for Transport at the following URL: <https://www.gov.uk/government/collections/road-accidents-and-safety-statistics>.

### References

- [1] European Commission. Proposal for a Directive of the European Parliament and of the Council discontinuing seasonal changes of time and repealing Directive 2000/84/EC. Technical Report COM(2018)0639, 2018.
- [2] European Parliament. European Parliament legislative resolution of 26 March 2019 on the proposal for a directive of the European Parliament and of the Council discontinuing seasonal changes of time and repealing Directive 2000/84/EC (COM(2018)0639 – C8-0408/2018 – 2018/0332(COD)), 2019.
- [3] House of Lords. Clock changes: is it time for change? . Technical Report European Union Committee, 5th Report of Session 2019–21, House of Lords Authority, 2020.
- [4] Oliver Bennett. Daylight Saving Bill 2010-11, 2010.
- [5] M. Meira e Cruz, M. Miyazawa, R. Manfredini, D. Cardinali, J. A. Madrid, R. Reiter, J. F. Araujo, R. Agostinho, and D. Acuna-Castroviejo. Impact of Daylight Saving Time on circadian timing system: An expert statement. *European Journal of Internal Medicine*, 60(January):1–3, 2019.

- 1  
2  
3  
4  
5  
6  
7 [6] Jason Varughese and Richard P. Allen. Fatal accidents following changes in daylight savings time: The  
8 American experience. *Sleep Medicine*, 2(1):31–36, 2001.
- 9  
10 [7] Rachel N. Carey and Kiran M. Sarma. Impact of daylight saving time on road traffic collision risk: A systematic  
11 review. *BMJ Open*, 7(6):1–14, 2017.
- 12  
13 [8] S. Plainis, I. J. Murray, and I. G. Pallikaris. Road traffic casualties: Understanding the night-time death toll.  
14 *Injury Prevention*, 12(2):125–128, 2006.
- 15  
16 [9] Austin C. Smith. Spring forward at your own risk: Daylight saving time and fatal vehicle crashes. *American  
17 Economic Journal: Applied Economics*, 8(2):65–91, 2016.
- 18  
19 [10] David Robb and Thomas Barnes. Accident rates and the impact of daylight saving time transitions. *Accident  
20 Analysis & Prevention*, 111(April 2017):193–201, 2 2018.
- 21  
22 [11] Douglas Coate and Sara Markowitz. The effects of daylight and daylight saving time on US pedestrian  
23 fatalities and motor vehicle occupant fatalities. *Accident Analysis and Prevention*, 36(3):351–357, 2004.
- 24  
25 [12] Joseph Crawley. *Testing for Robustness in the Relationship between Fatal Automobile Crashes and Daylight  
26 Saving Time*. PhD thesis, University of California, Berkeley, 2012.
- 27  
28 [13] Lena Marie Lindenberger, Hanns Ackermann, and Markus Parzeller. The controversial debate about daylight  
29 saving time (DST)—results of a retrospective forensic autopsy study in Frankfurt/Main (Germany) over 10 years  
30 (2006–2015). *International Journal of Legal Medicine*, 133(4):1259–1265, 2019.
- 31  
32 [14] Jean Adams, Martin White, and Peter Heywood. Year-round daylight saving and serious or fatal road traffic  
33 injuries in children in the north-east of England. *Journal of Public Health*, 27(4):316–317, 2005.
- 34  
35 [15] John M. Sullivan and Michael J. Flannagan. The role of ambient light level in fatal crashes: Inferences from  
36 daylight saving time transitions. *Accident Analysis and Prevention*, 34(4):487–498, 2002.
- 37  
38 [16] Jim Uttley and Steve Fotios. The effect of ambient light condition on road traffic collisions involving  
39 pedestrians on pedestrian crossings. *Accident Analysis and Prevention*, 108(March):189–200, 2017.
- 40  
41 [17] Fotios, S., Robbins, C. J., & Uttley, J. A comparison of approaches for investigating the impact of ambient  
42 light on road traffic collisions. *Lighting Research & Technology*, 53(3), 249–261, 2021.
- 43  
44 [18] Raynham, P., Unwin, J., Khazova, M., & Tolia, S. The role of lighting in road traffic collisions. *Lighting  
45 Research & Technology*, 52(4), 485–494, 2020.
- 46  
47 [19] C. Hausman and D. S. Rapson. Regression Discontinuity in Time: Considerations for Empirical Applications.  
48 *Annual Review of Resource Economics*, 10:533–552, 2018.
- 49  
50 [dataset][20] Department for Transport. Data from: Road casualty annual statistics. STATS19 Database Repository,  
51 October 16, 2021. URL [www.gov.uk/government/collections/road-accidents-and-safety-statistics](http://www.gov.uk/government/collections/road-accidents-and-safety-statistics).
- 52  
53 [21] Department for Transport. Reported Road Casualties in Great Britain: notes, definitions, symbols and  
54 conventions. *Department for Transport*, pages 1–6, 2017.
- 55  
56 [22] Ordnance Survey. Using the National Grid, 2021. URL [getoutside.ordnancesurvey.co.uk/guides](http://getoutside.ordnancesurvey.co.uk/guides).
- 57  
58 [23] Guido W. Imbens and Thomas Lemieux. Regression discontinuity designs: A guide to practice. *Journal of  
59 Econometrics*, 142:615–635, 2008.
- 60

- 1  
2  
3  
4  
5  
6  
7  
8 [24] David S Lee and Thomas Lemieux. Regression Discontinuity Designs in Economics. *Journal of Economic*  
9 *Literature*, 48(2):281–355, 2010.
- 10 [25] Cattaneo, M. D., and Vazquez-Bare, G. The Choice of Neighborhood in Regression Discontinuity Designs.  
11 *Observational Studies*, 2: 134–146, 2016.
- 12  
13 [26] Guido Imbens and Karthik Kalyanaraman. Optimal bandwidth choice for the regression discontinuity  
14 estimator. *Review of Economic Studies*, 79: 933-959, 2012.
- 15  
16 [27] Sebastian Calonico, Matias D. Cattaneo, and Rocio Titiunik. Rdrobust: An R package for robust nonparametric  
17 inference in regression-discontinuity designs. *R Journal*, 7(1):38–51, 2015.
- 18  
19 [28] Felix Thoemmes, Wang Liao, and Ze Jin. The Analysis of the Regression-Discontinuity Design in R. *Journal*  
20 *of Educational and Behavioral Statistics*, 42(3):341–360, 2017.
- 21  
22 [29] T. S. Breusch. Testing for Autocorrelation in Dynamic Linear Models. *Australian Economic Papers*, 17:334–  
23 335, 1978.
- 24  
25 [30] L. G. Godfrey. Testing Against General Autoregressive and Moving Average Error Models when the  
26 Regressors Include Lagged Dependent Variables. *Econometrica*, 46:1293–1301, 1978.
- 27  
28 [31] Newey W. K. and K. D. West. A Simple, Positive-Definite, Heteroskedasticity and Autocorrelation Consistent  
29 Covariance Matrix. *Econometrica*, 55:703–708, 1987.
- 30  
31 [32] T. S. Breusch and A. R. Pagan. A Simple Test for Heteroskedasticity and Random Coefficient Variation.  
32 *Econometrica*, 47(5):1287–1294, 1979.
- 33  
34 [33] J. G. MacKinnon and H. White. Some Heteroskedasticity-Consistent Covariance Matrix Estimators with  
35 Improved Finite Sample Properties. *Journal of Econometrics*, 29:305–325, 1985.
- 36  
37 [34] DiCiccio, T. J., Efron, B. Bootstrap confidence intervals. *Statistical Science* 11 (3), 189–228, 1996.
- 38  
39 [35] Efron, B., 1987. Better bootstrap confidence intervals. *Journal of the American Statistical Association* 82 (397),  
40 171–185.
- 41  
42 [36] Heather Ward, Ronan Lyons, and Roselle Thoreau. Under-reporting of Road Casualties – Phase 1. Technical  
43 Report Road Safety Research Report No. 69, 2006.
- 44  
45  
46  
47  
48  
49  
50  
51  
52  
53  
54  
55  
56  
57  
58  
59  
60

1  
2  
3  
4  
5  
6  
7 **Figure 1 notes**  
8

9 Values on the x-axis refer to Eastings bands, and values on the y-axis refer to Northings bands.  
10 The two letters in each grid square refer to specific locations on the UK National Grid; the exact  
11 naming of each square can be found at Ordnance Survey [22].  
12  
13  
14  
15  
16  
17  
18  
19  
20  
21  
22  
23  
24  
25  
26  
27  
28  
29  
30  
31  
32  
33  
34  
35  
36  
37  
38  
39  
40  
41  
42  
43  
44  
45  
46  
47  
48  
49  
50  
51  
52  
53  
54  
55  
56  
57  
58  
59  
60

For peer review only

1  
2  
3  
4  
5  
6  
7  
8  
9  
10  
11  
12  
13  
14  
15  
16  
17  
18  
19  
20  
21  
22  
23  
24  
25  
26  
27  
28  
29  
30  
31  
32  
33  
34  
35  
36  
37  
38  
39  
40  
41  
42  
43  
44  
45  
46  
47  
48  
49  
50  
51  
52  
53  
54  
55  
56  
57  
58  
59  
60

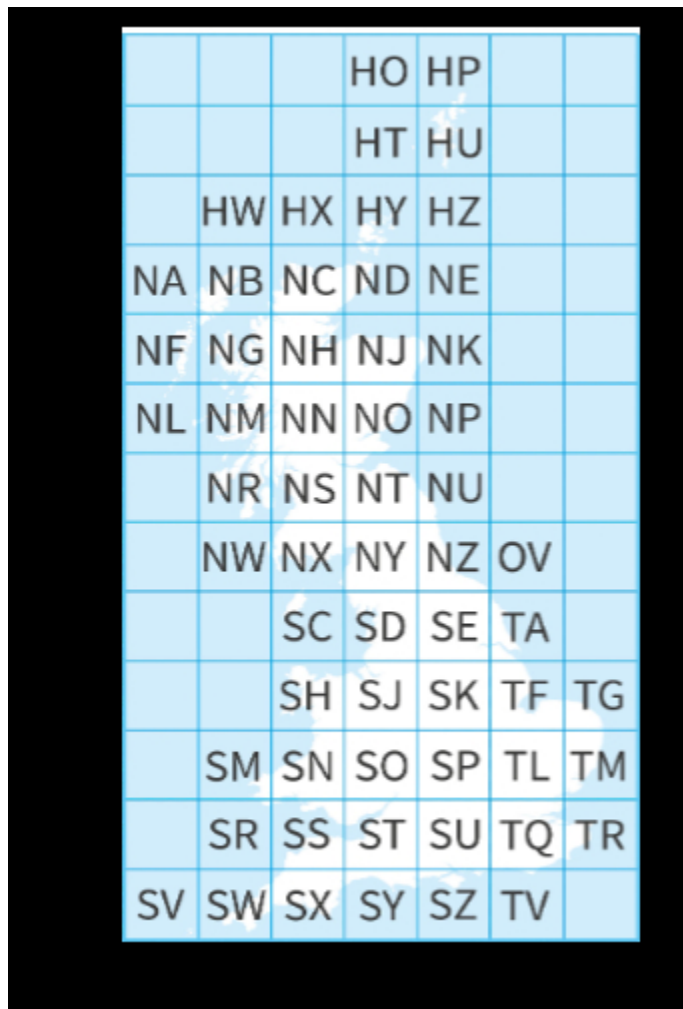

Figure 1: Definition of Northing and Eastings bands in Great Britain (adapted from Ordnance Survey [20], not to scale).

91x133mm (96 x 96 DPI)

# Spring total casualties, aggregate, time period 1

BMJ Open

1  
2  
3  
4  
5  
6  
7  
8  
9  
10  
11  
12  
13  
14  
15  
16  
17  
18  
19  
20

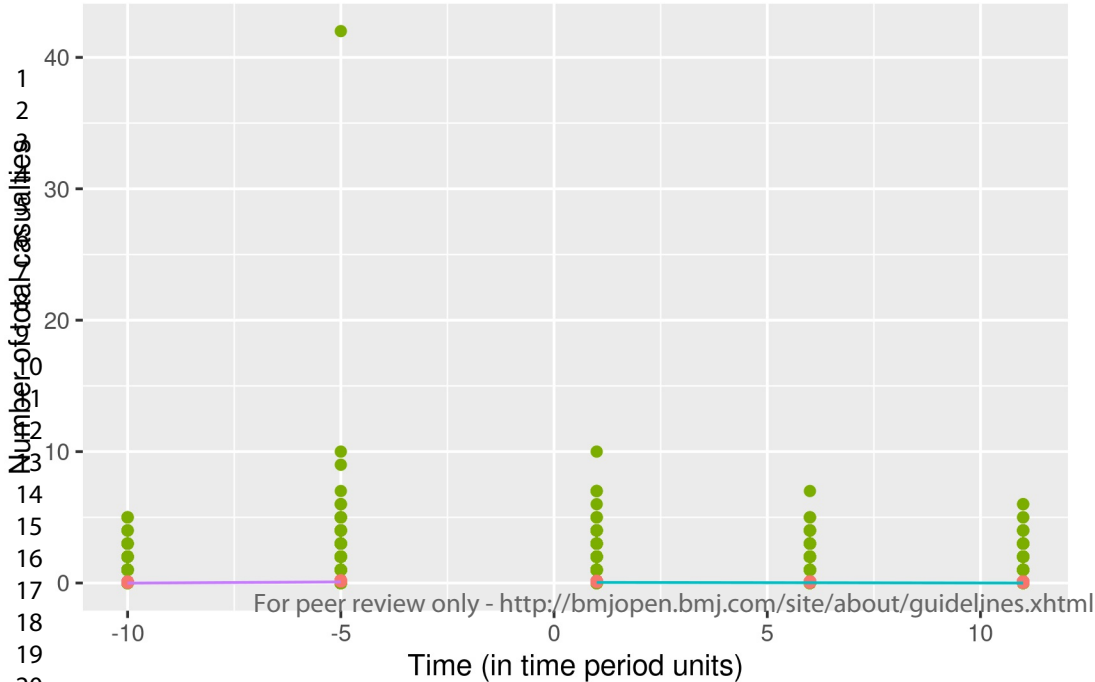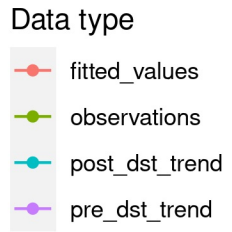



BMJ Open

1  
2  
3  
4  
5  
6  
7  
8  
9  
10  
11  
12  
13  
14  
15  
16  
17  
18  
19  
20

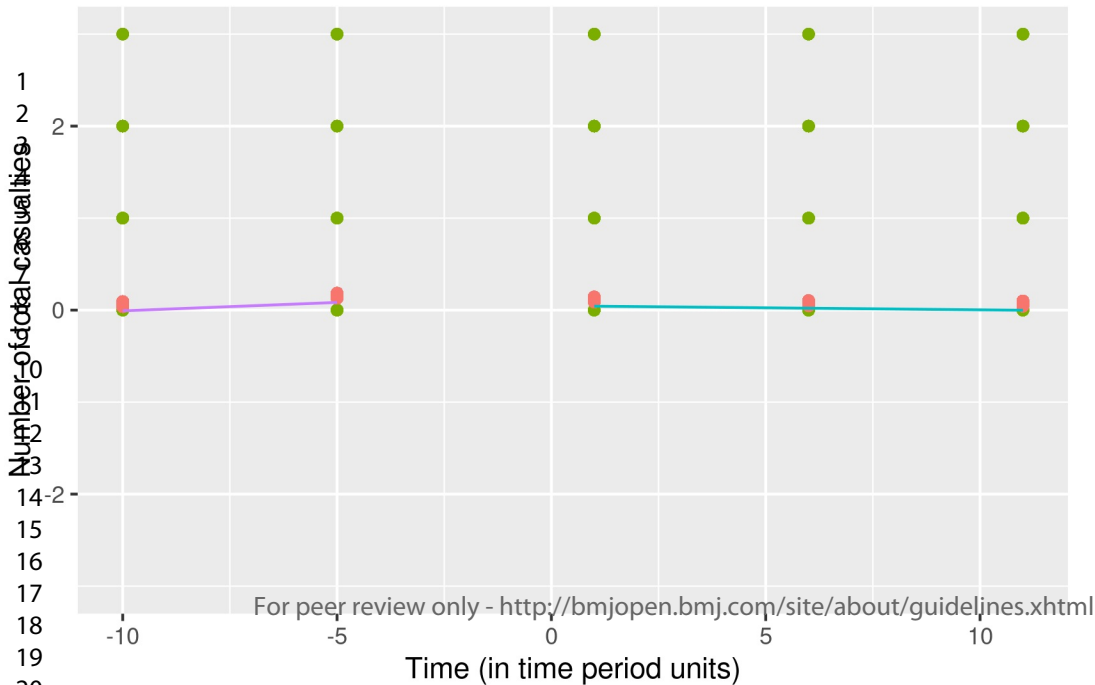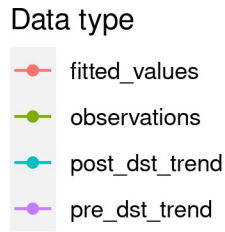

# Spring total casualties, aggregate, time period 4

BMJ Open

1  
2  
3  
4  
5  
6  
7  
8  
9  
10  
11  
12  
13  
14  
15  
16  
17  
18  
19  
20

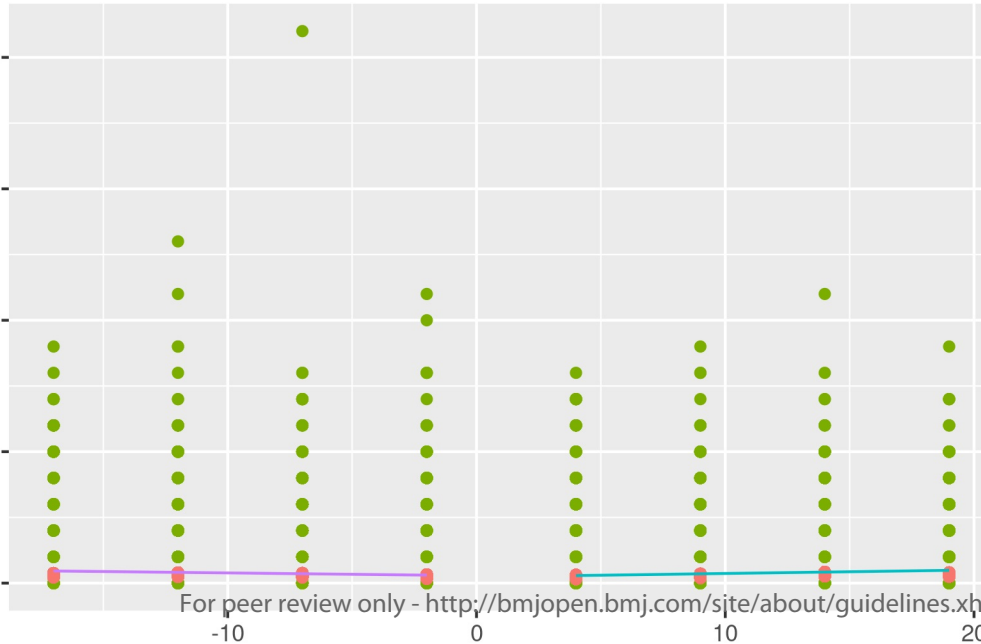

For peer review only - <http://bmjopen.bmj.com/site/about/guidelines.xhtml>

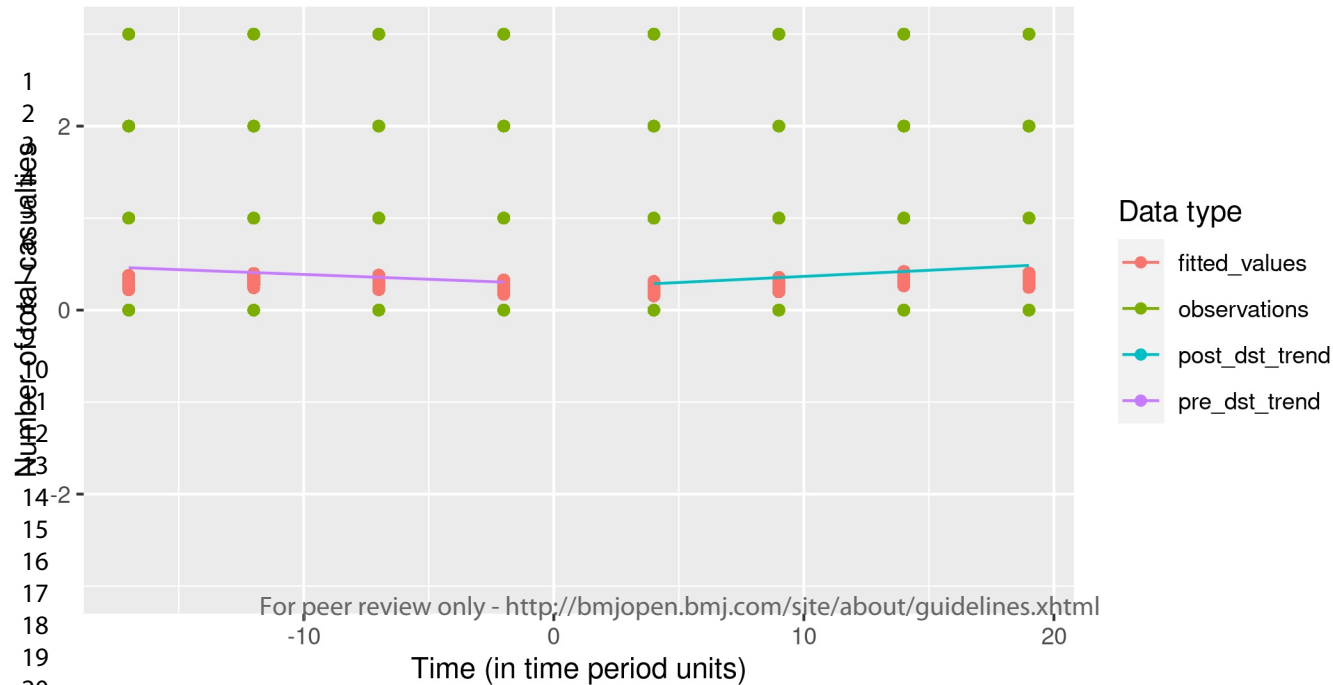

# Spring total casualties, aggregate, time period 5

BMJ Open

1  
2  
10  
5  
1  
2  
3  
14  
15  
16  
17  
18  
19  
20

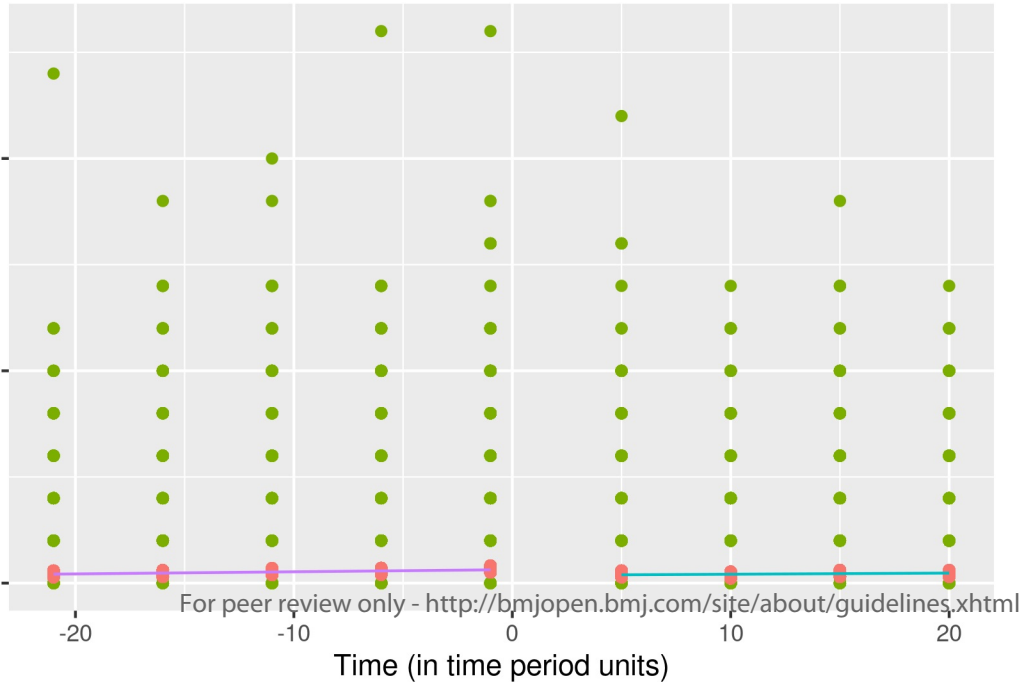

For peer review only - <http://bmjopen.bmj.com/site/about/guidelines.xhtml>

BMJ Open

1  
2  
3  
4  
5  
6  
7  
8  
9  
10  
11  
12  
13  
14  
15  
16  
17  
18  
19  
20

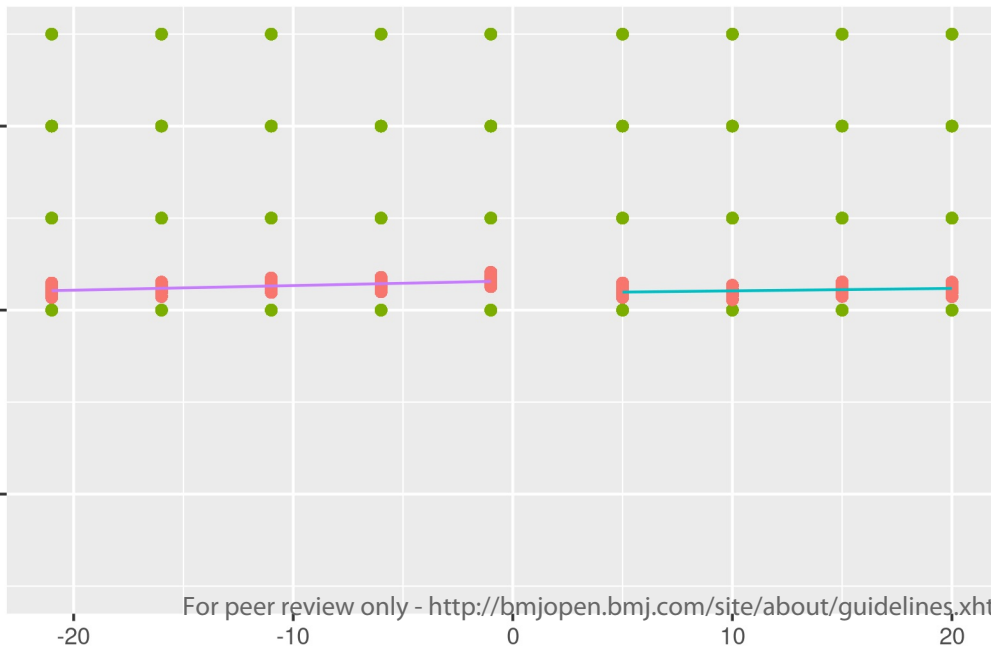

### Data type

- fitted\_values
- observations
- post\_dst\_trend
- pre\_dst\_trend

1  
2  
3  
4  
5  
6  
7  
8  
9  
10  
11  
12  
13  
14  
15  
16  
17  
18  
19  
20

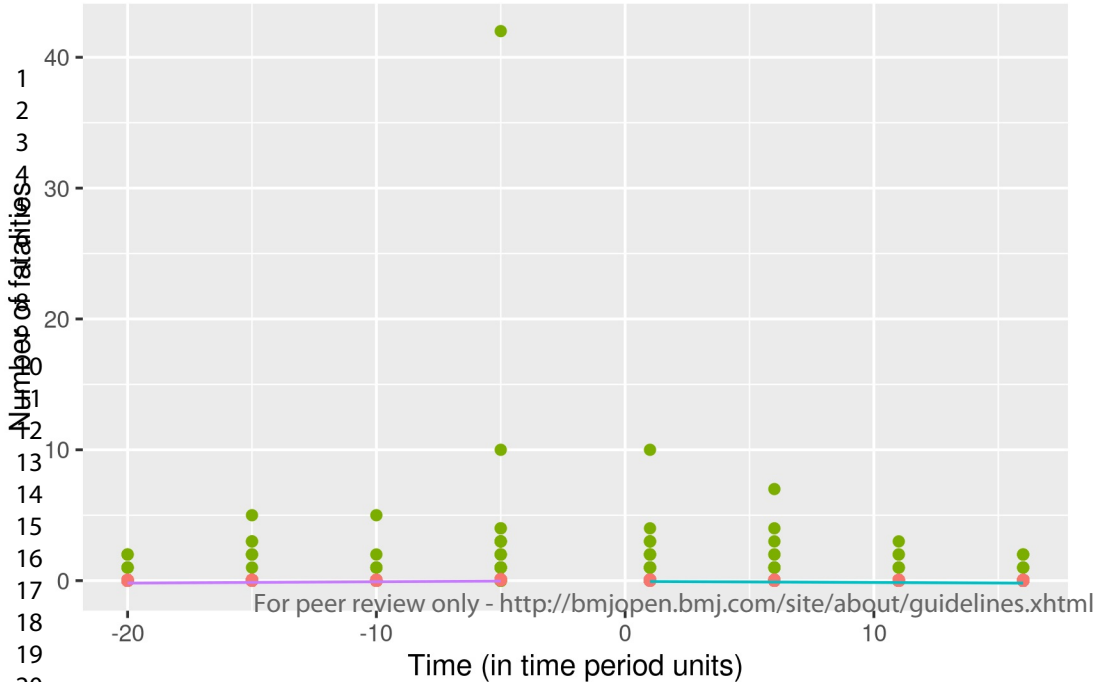

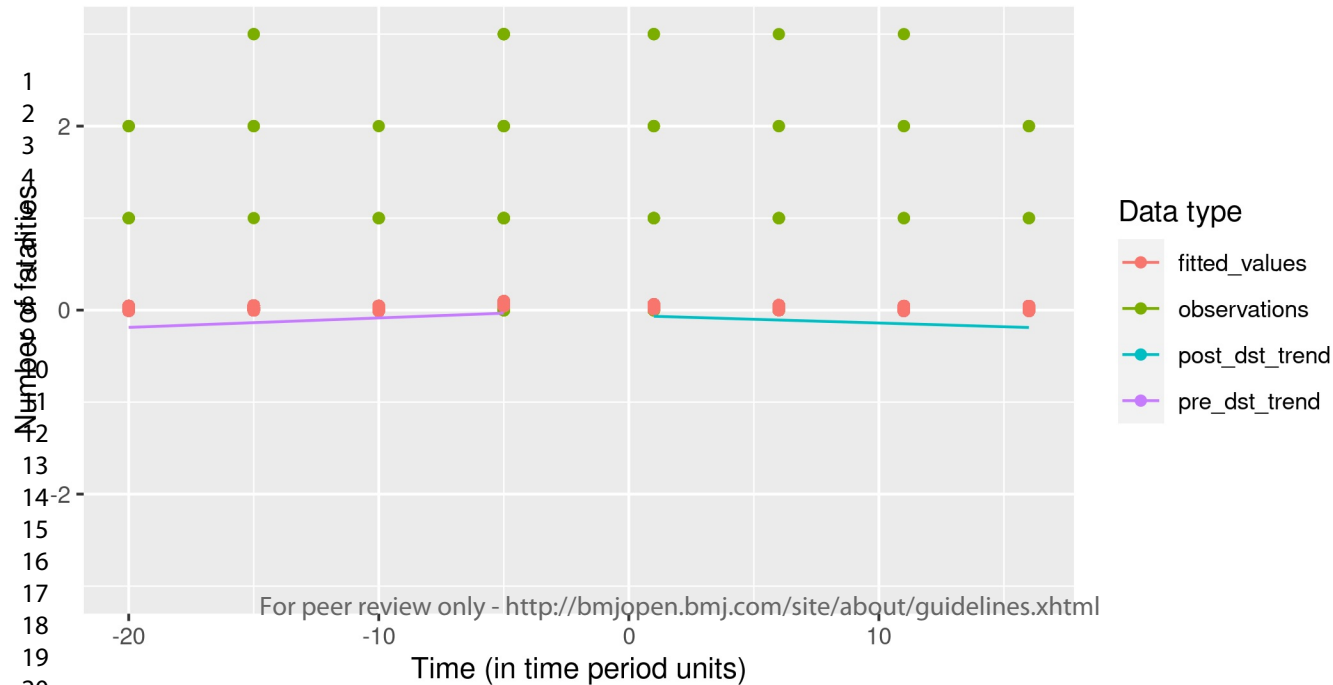

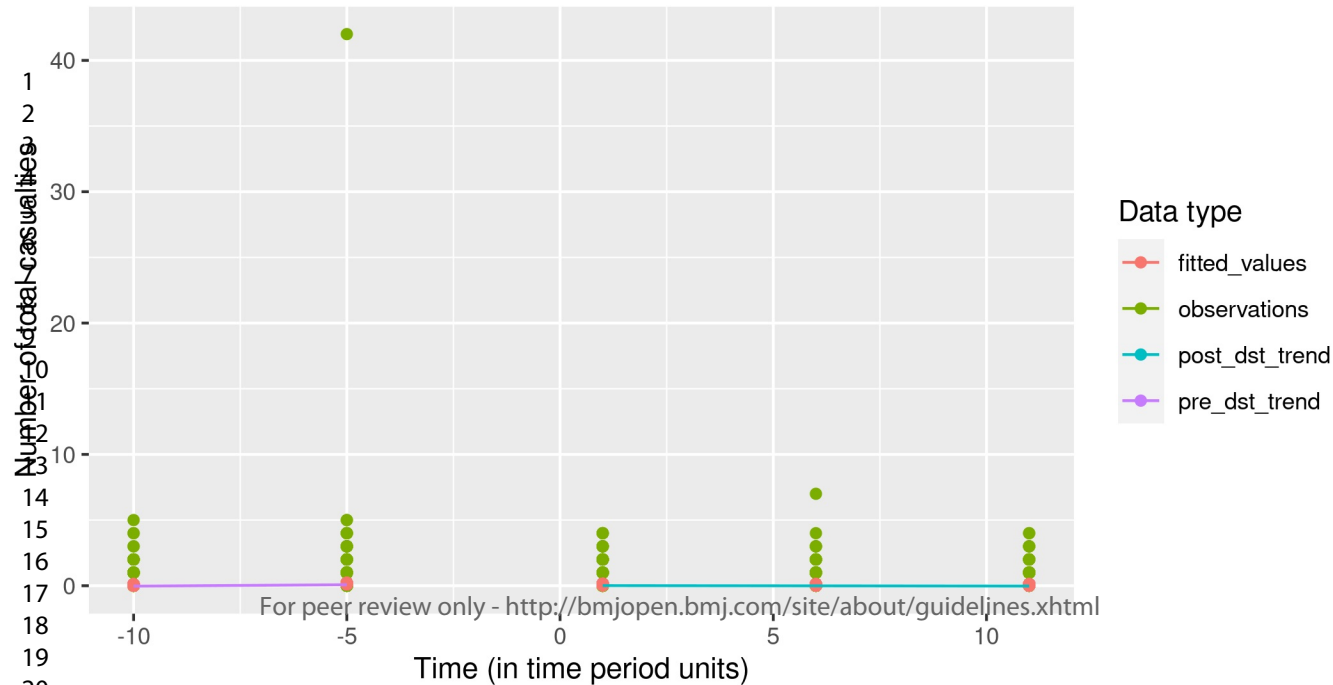



1  
2  
3  
4  
5  
6  
7  
8  
9  
10  
11  
12  
13  
14  
15  
16  
17  
18  
19  
20

Number of total casualties

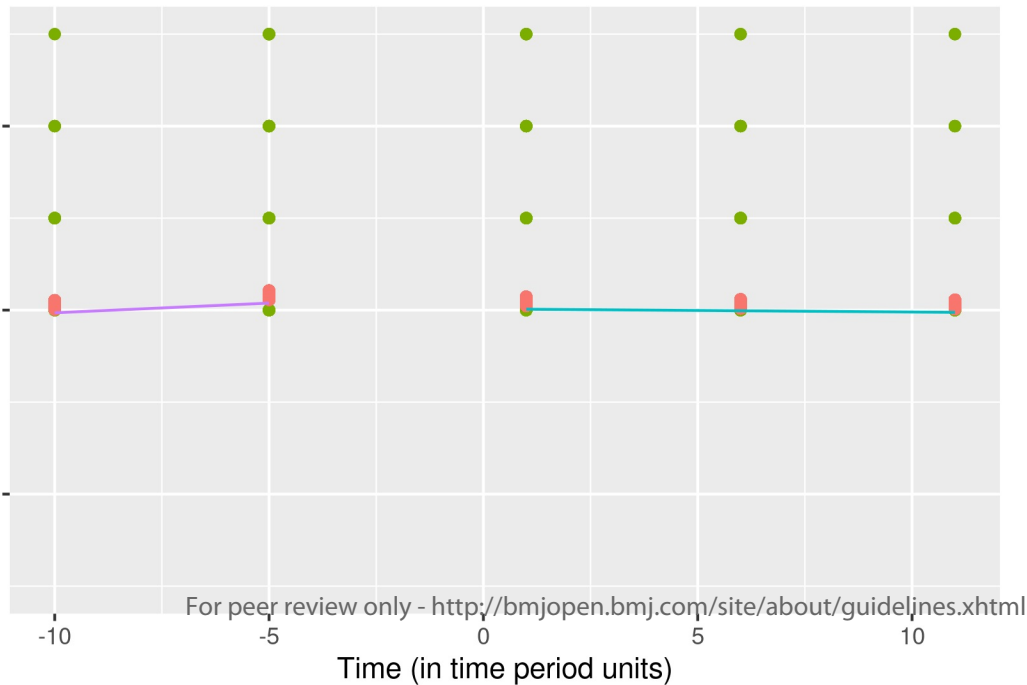

1  
2  
3  
4  
5  
6  
7  
8  
9  
10  
11  
12  
13  
14  
15  
16  
17  
18  
19  
20

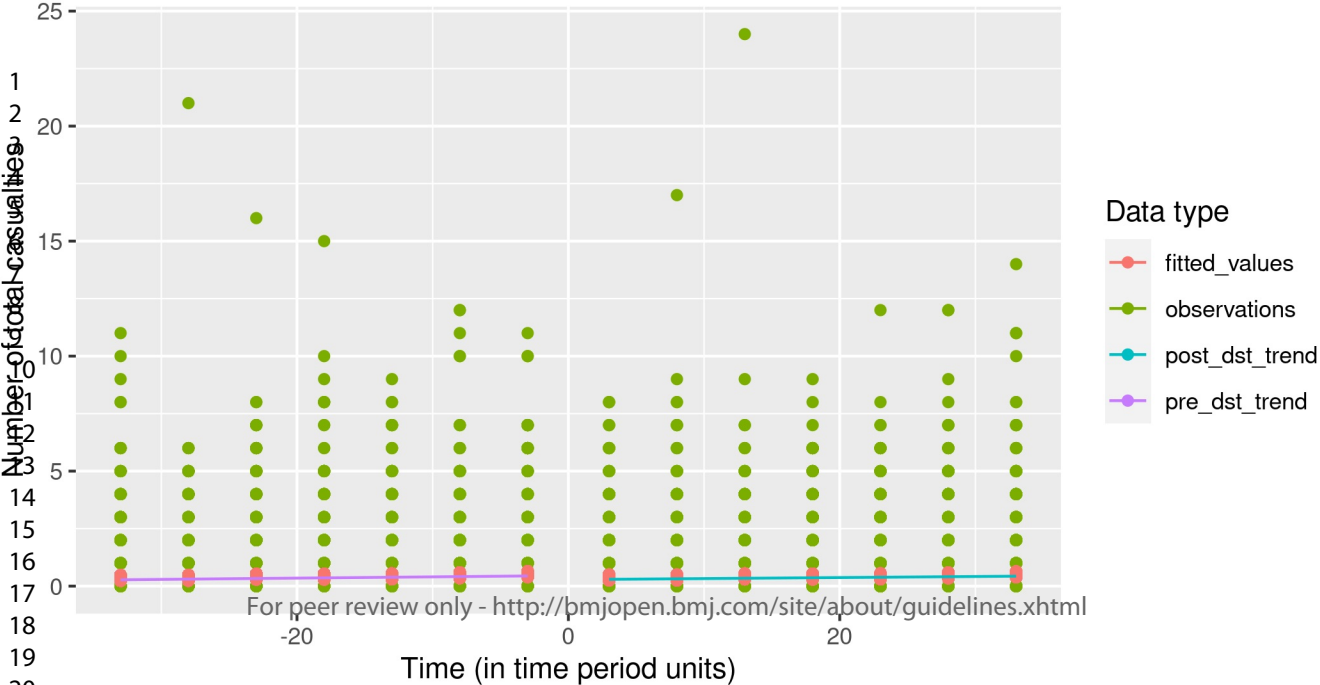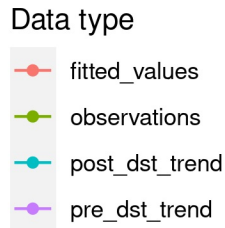

For peer review only - <http://bmjopen.bmj.com/site/about/guidelines.xhtml>

1  
2  
3  
4  
5  
6  
7  
8  
9  
10  
11  
12  
13  
14  
15  
16  
17  
18  
19  
20

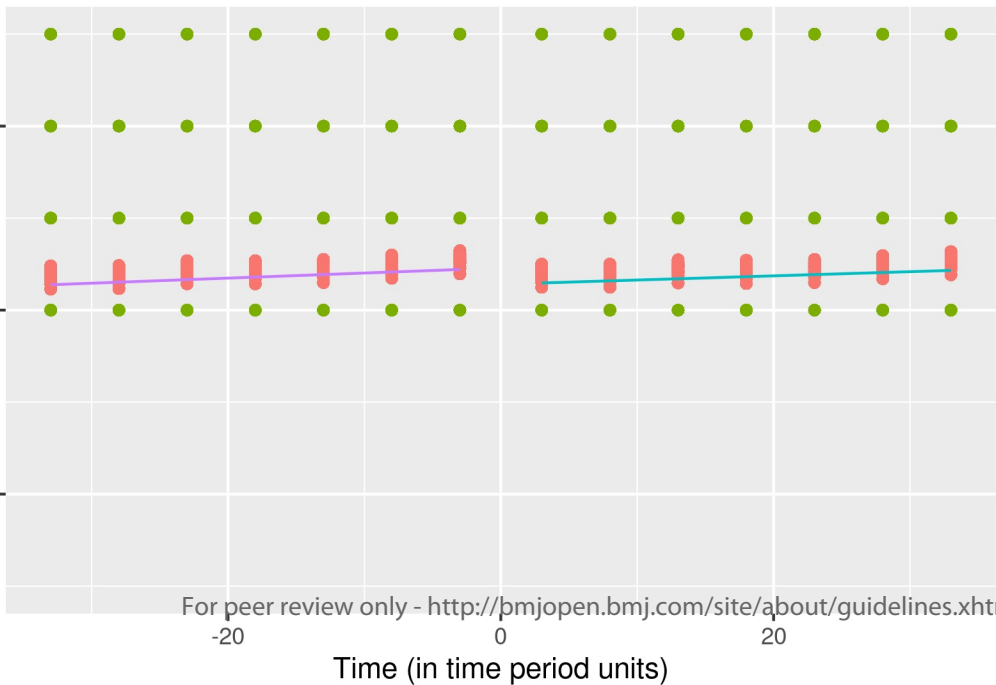

# Spring total casualties, eastings, band 4000 - 5000, time period 1

BMJ Open

1  
2  
3  
4  
5  
6  
7  
8  
9  
10  
11  
12  
13  
14  
15  
16  
17  
18  
19  
20

Number of total casualties

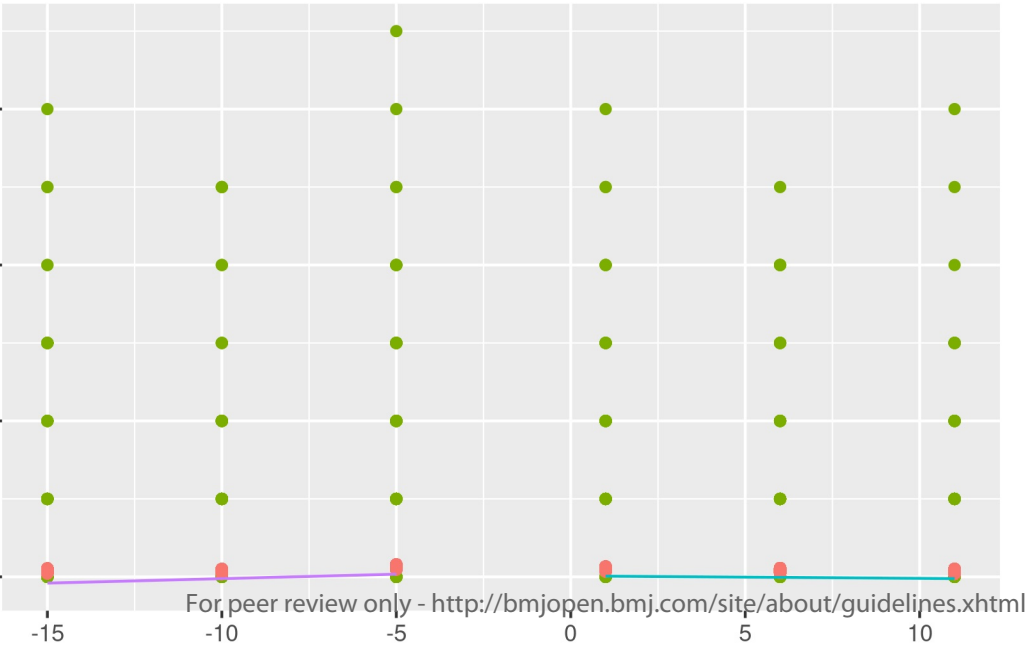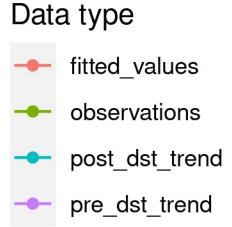

For peer review only - <http://bmjopen.bmj.com/site/about/guidelines.xhtml>

1  
2  
3  
4  
5  
6  
7  
8  
9  
10  
11  
12  
13  
14  
15  
16  
17  
18  
19  
20

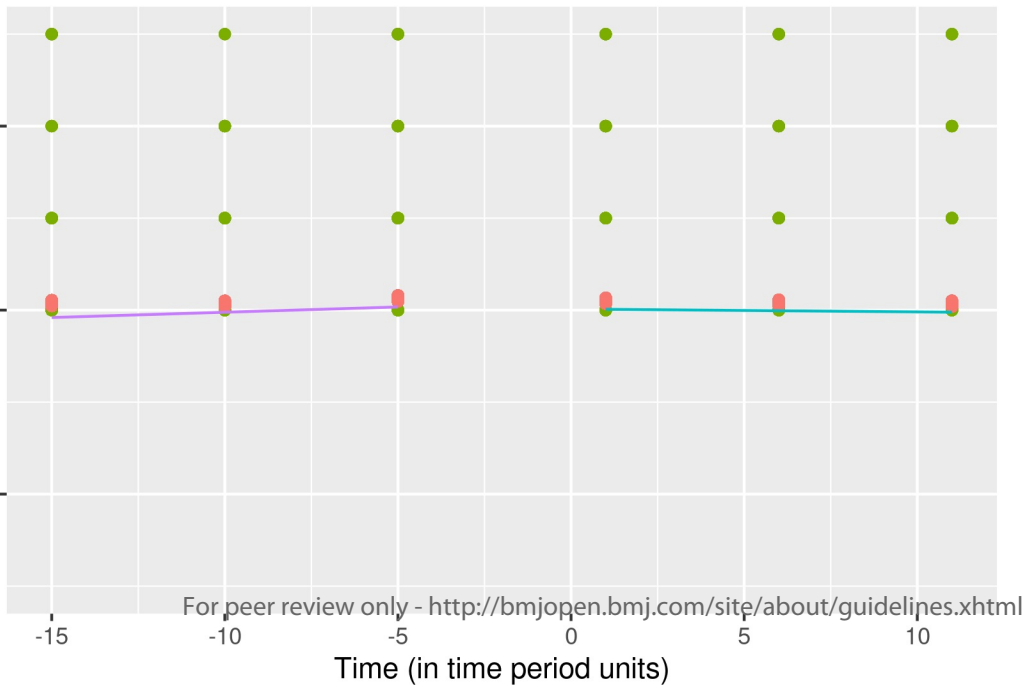

BMJ Open

1  
2  
10  
5  
1  
2  
3  
14  
15  
16  
17  
18  
19  
20

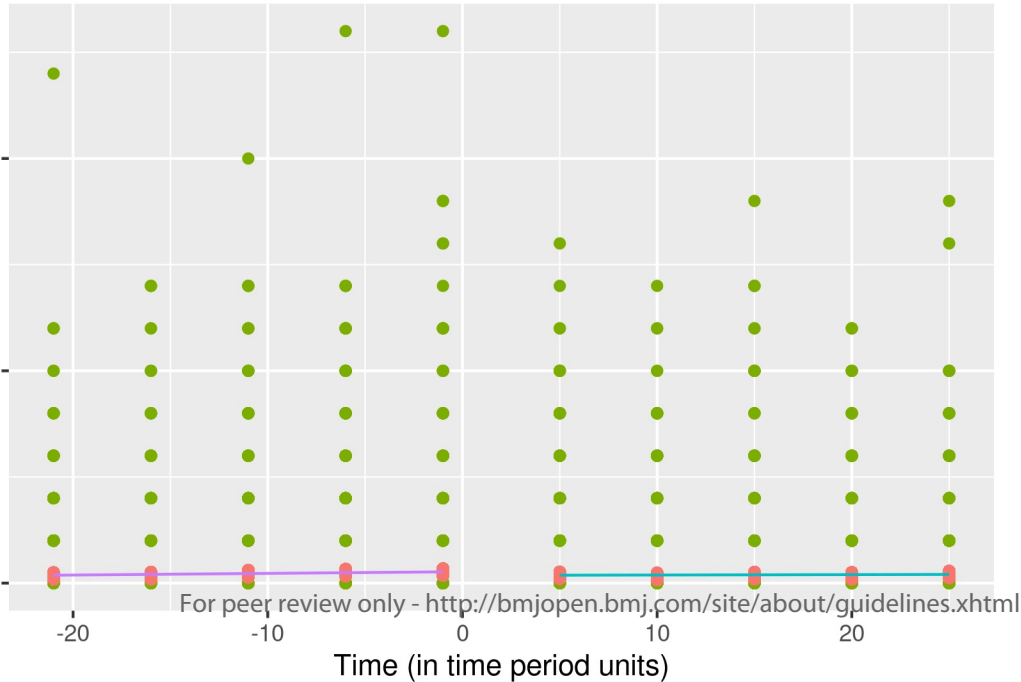

1  
2  
3  
4  
5  
6  
7  
8  
9  
10  
11  
12  
13  
14  
15  
16  
17  
18  
19  
20

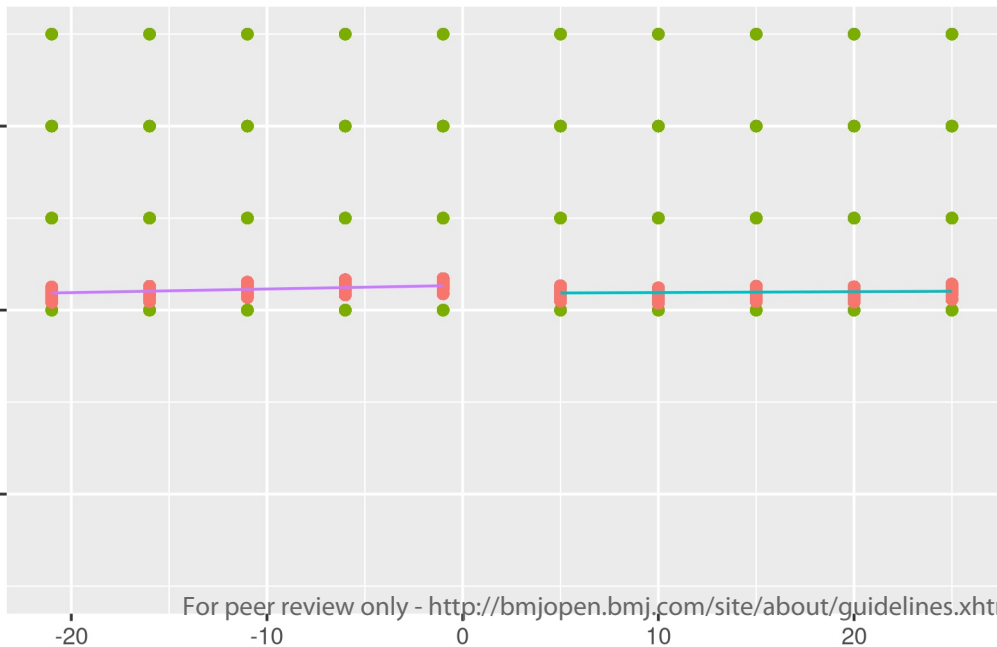

# Spring total casualties, eastings, band 5000 - 6000, time period 5

BMJ Open

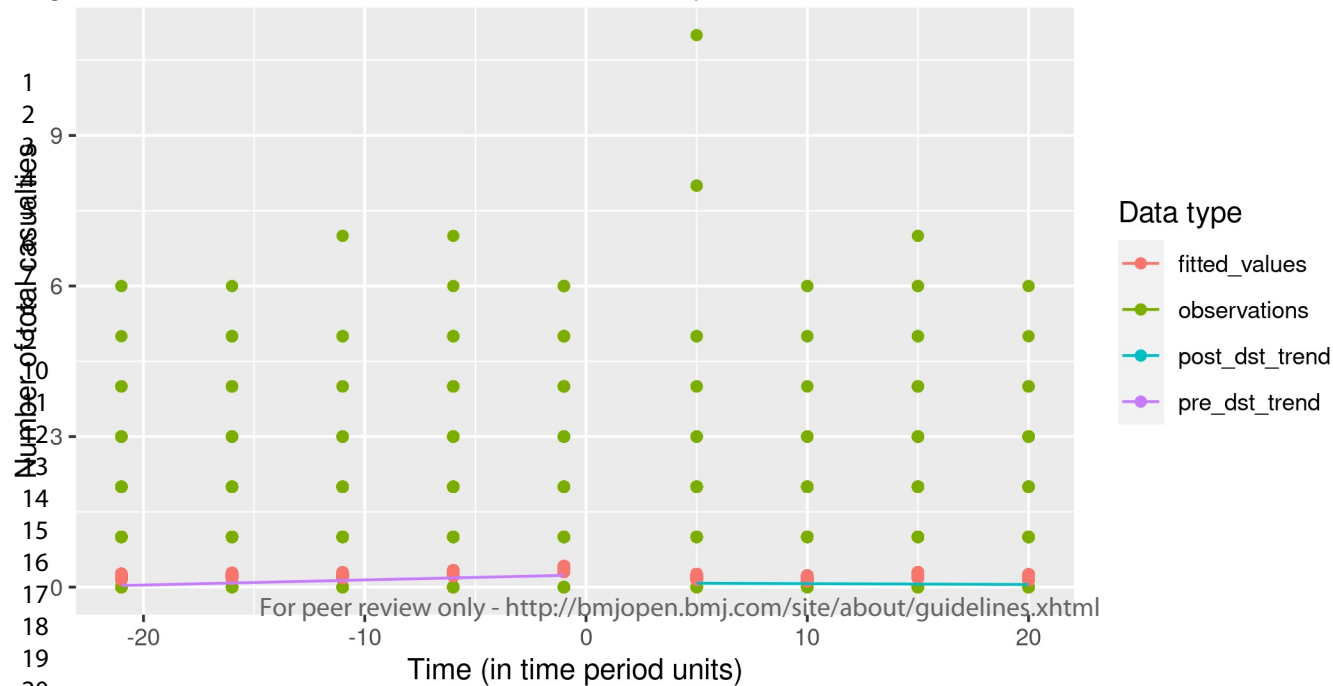



1  
2  
3  
4  
5  
6  
7  
8  
9  
10  
11  
12  
13  
14  
15  
16  
17  
18  
19  
20

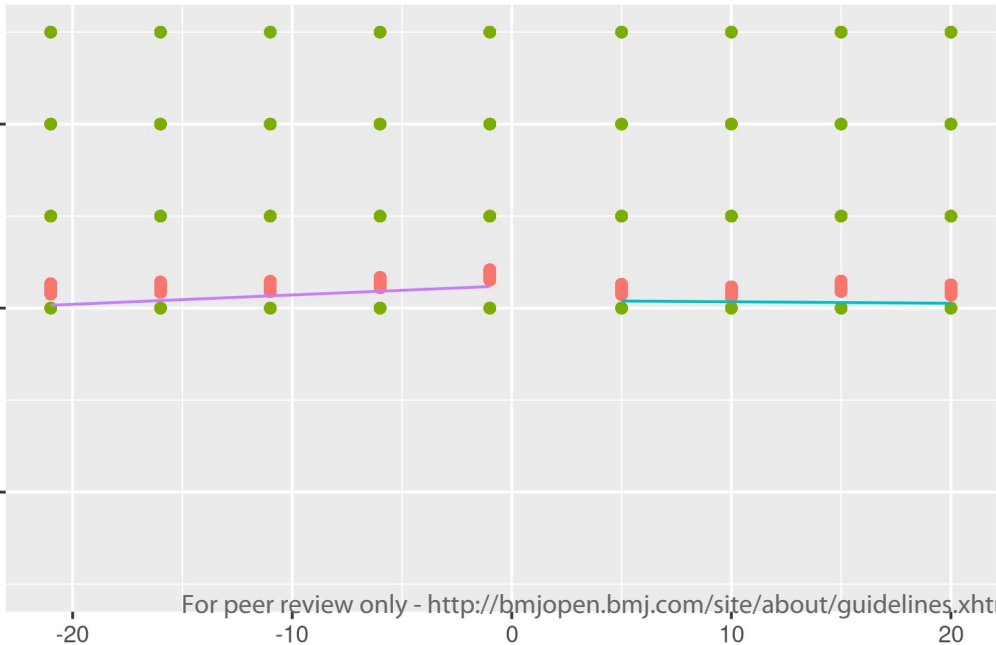

Data type

- fitted\_values
- observations
- post\_dst\_trend
- pre\_dst\_trend

1  
2  
3  
4  
5  
6  
7  
8  
9  
10  
11  
12  
13  
14  
15  
16  
17  
18  
19  
20

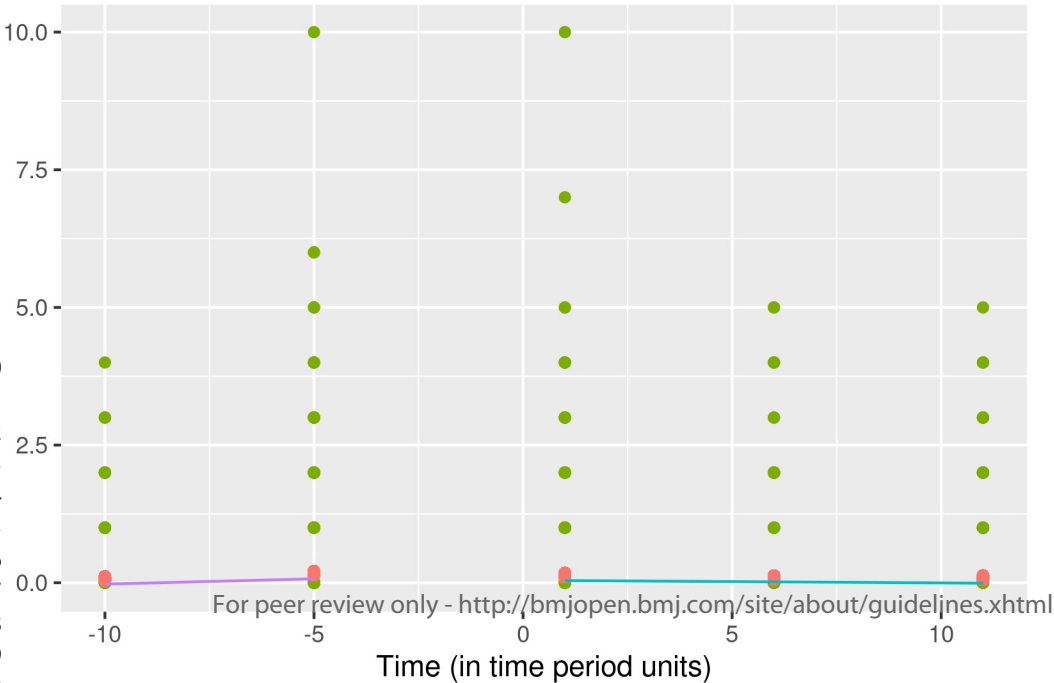

1  
2  
3  
4  
5  
6  
7  
8  
9  
10  
11  
12  
13  
14  
15  
16  
17  
18  
19  
20

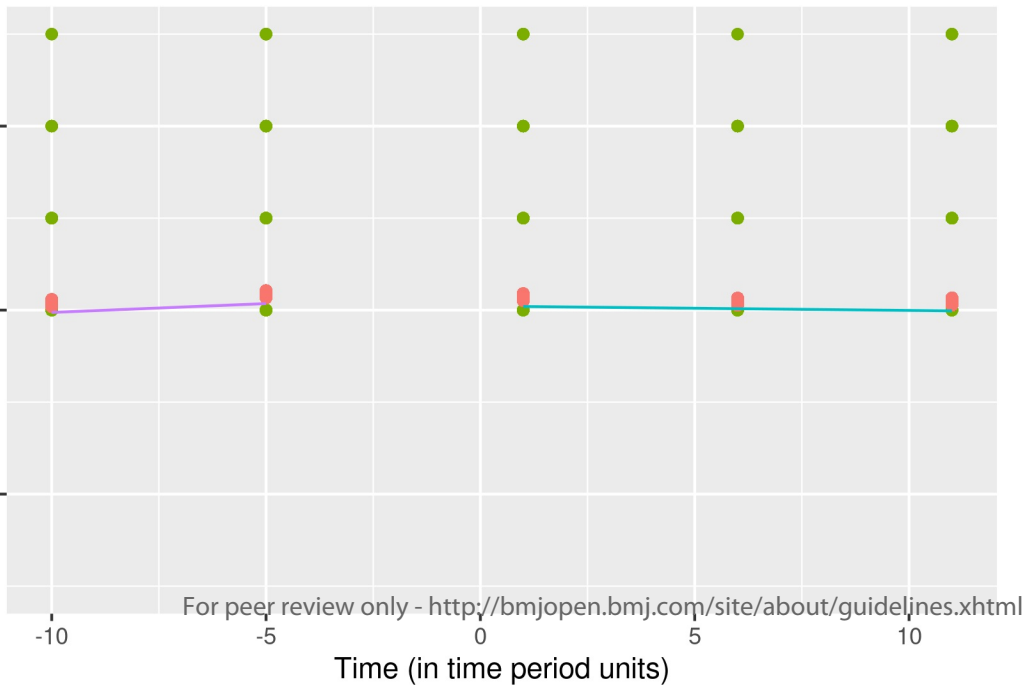

# Spring total casualties, eastings, band 5000 - 6000, time period 4

BMJ Open

1  
2  
9  
6  
3  
1  
2  
3  
4  
14  
15  
16  
17  
18  
19  
20

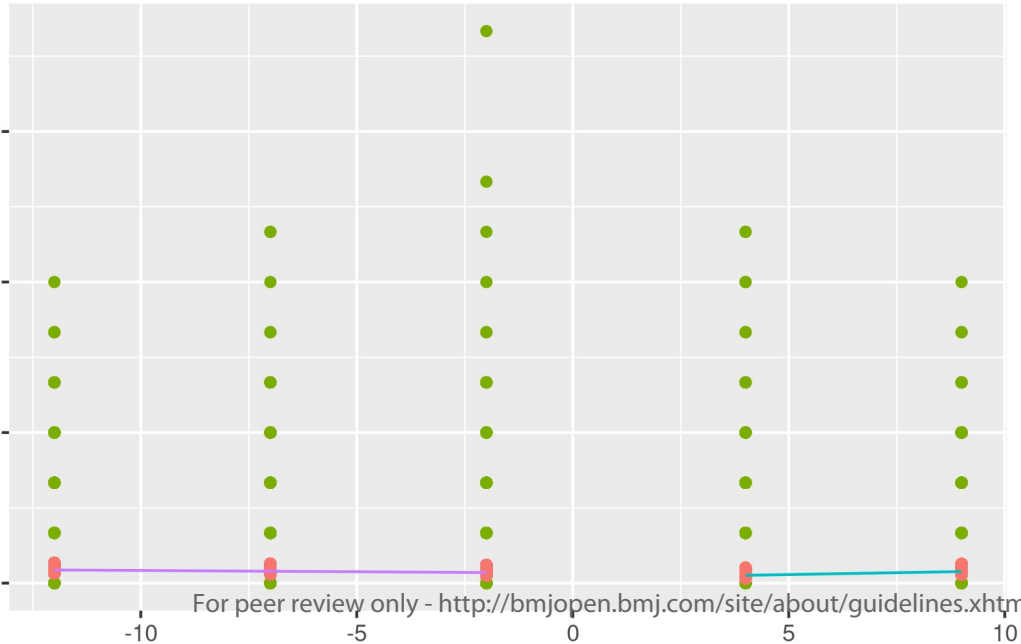

Data type

- fitted\_values
- observations
- post\_dst\_trend
- pre\_dst\_trend

For peer review only - <http://bmjopen.bmj.com/site/about/guidelines.xhtml>

1  
2  
3  
4  
5  
6  
7  
8  
9  
10  
11  
12  
13  
14  
15  
16  
17  
18  
19  
20

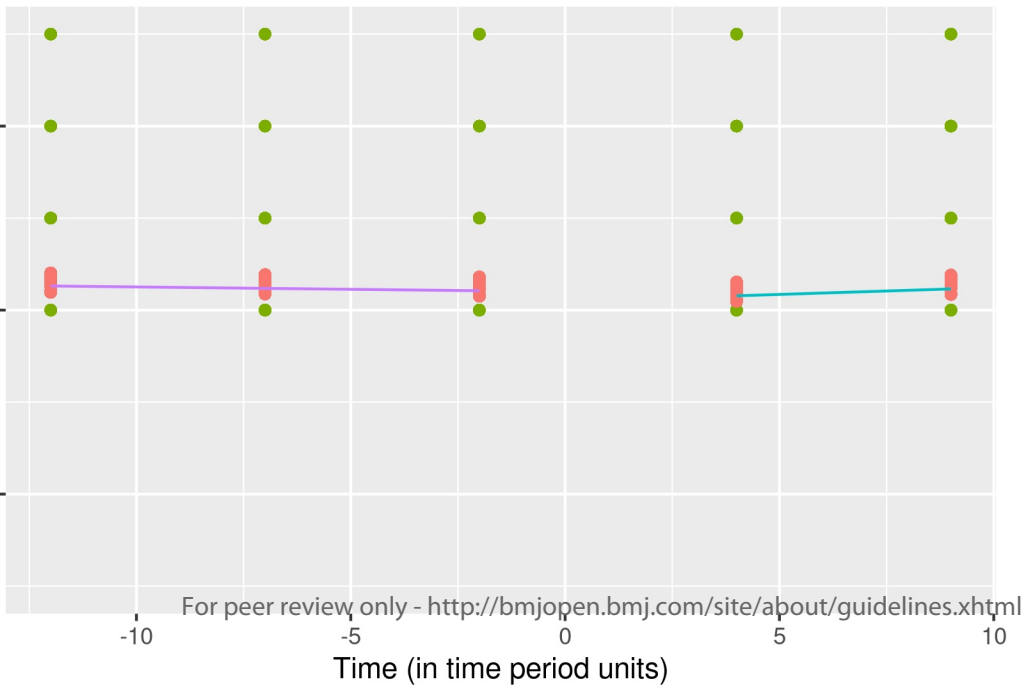

# Spring total casualties, eastings, band 5000 - 6000, time period 3

1  
2  
3  
4  
5  
6  
7  
8  
9  
10  
11  
12  
13  
14  
15  
16  
17  
18  
19  
20

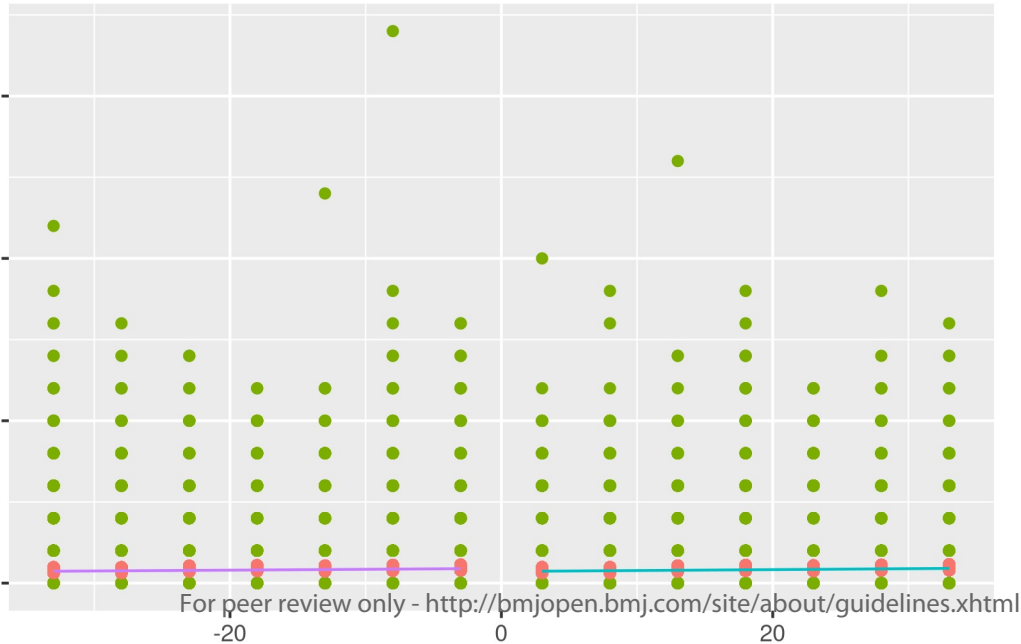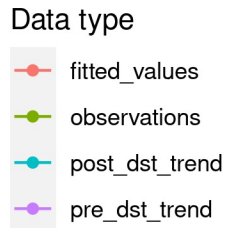

1  
2  
3  
4  
5  
6  
7  
8  
9  
10  
11  
12  
13  
14  
15  
16  
17  
18  
19  
20

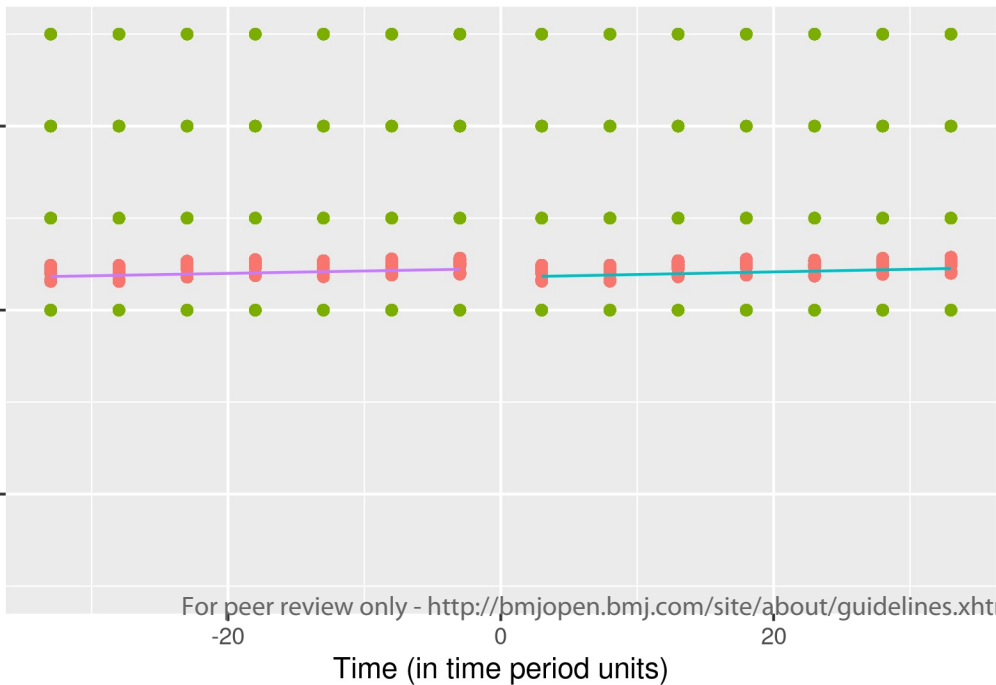

BMJ Open

1  
2  
3  
4  
5  
6  
7  
8  
9  
10  
11  
12  
13  
14  
15  
16  
17  
18  
19  
20

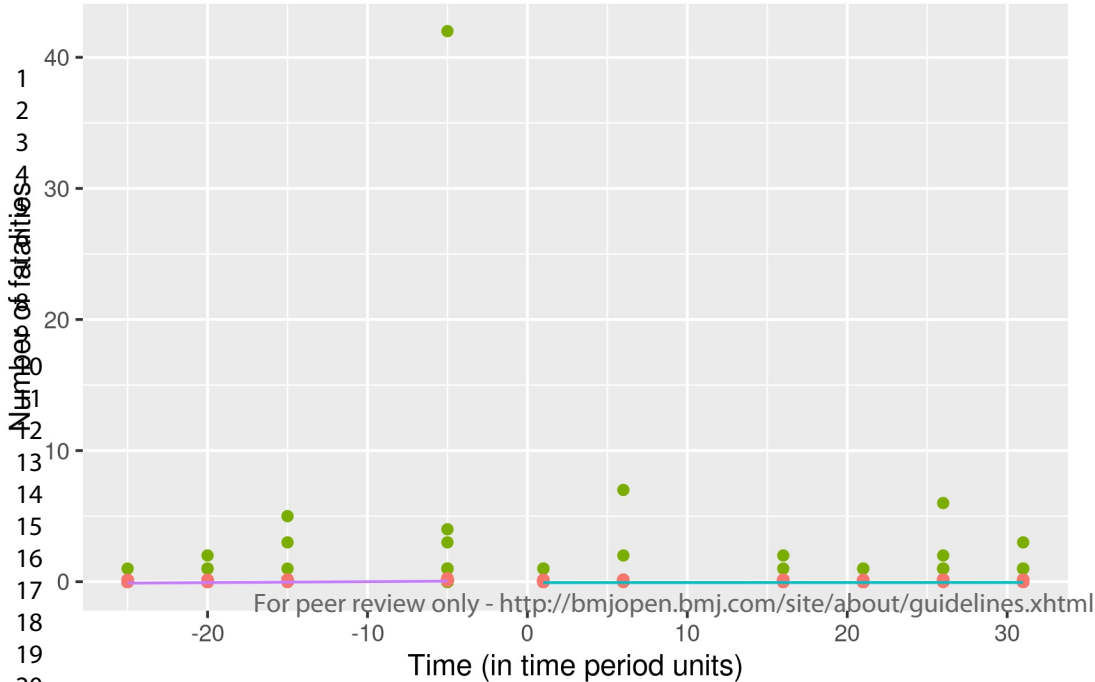



BMJ Open

1  
2  
3  
4  
5  
6  
7  
8  
9  
10  
11  
12  
13  
14  
15  
16  
17  
18  
19  
20

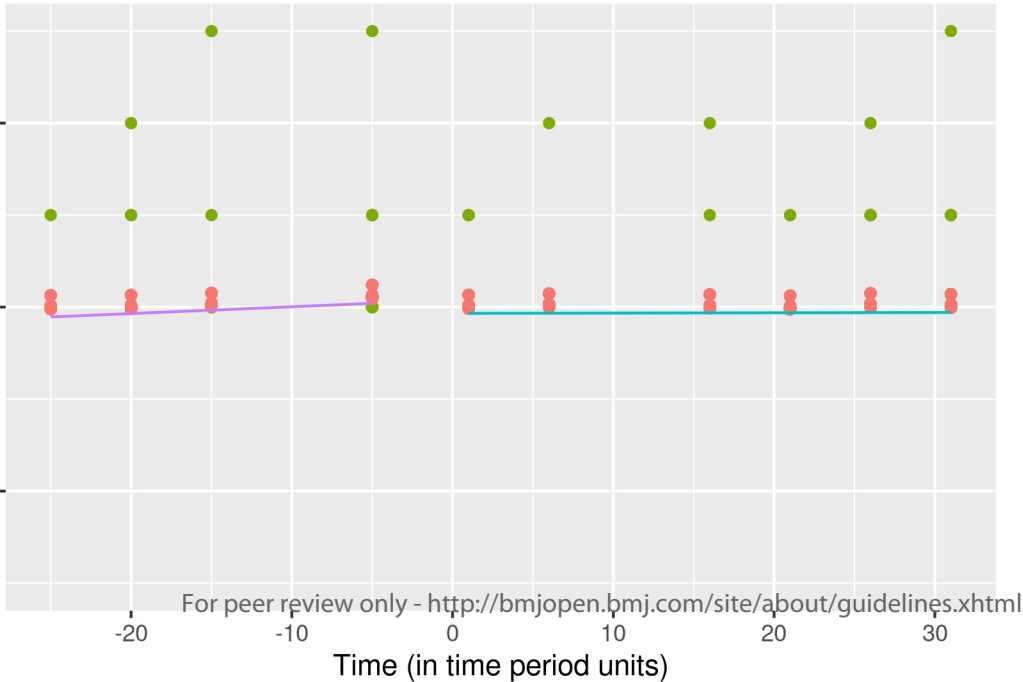

1  
2  
3  
4  
5  
6  
7  
8  
9  
10  
11  
12  
13  
14  
15  
16  
17  
18  
19  
20

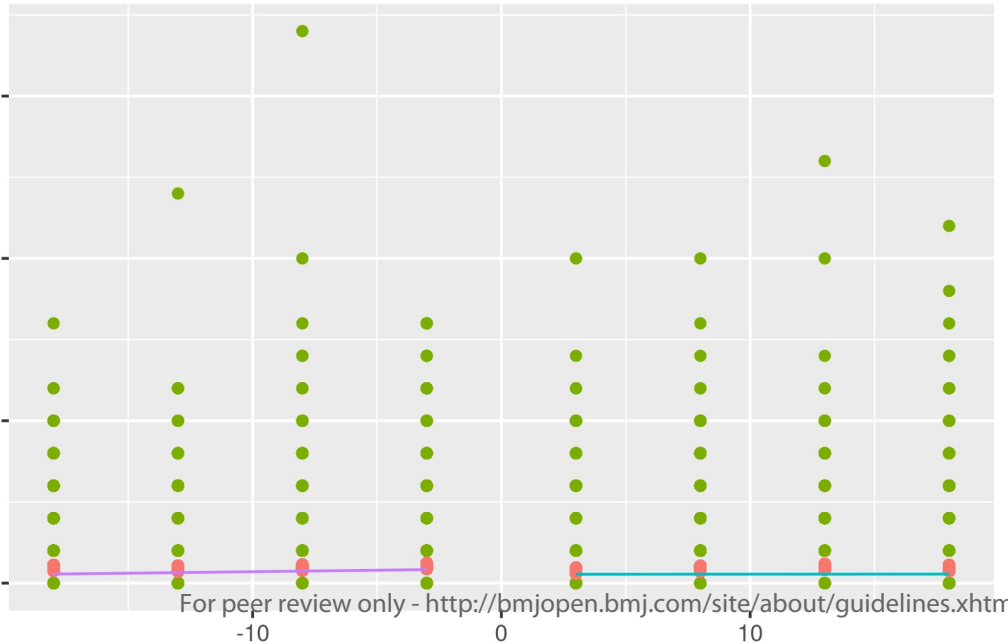

For peer review only - <http://bmjopen.bmj.com/site/about/guidelines.xhtml>

1  
2  
3  
4  
5  
6  
7  
8  
9  
10  
11  
12  
13  
14  
15  
16  
17  
18  
19  
20

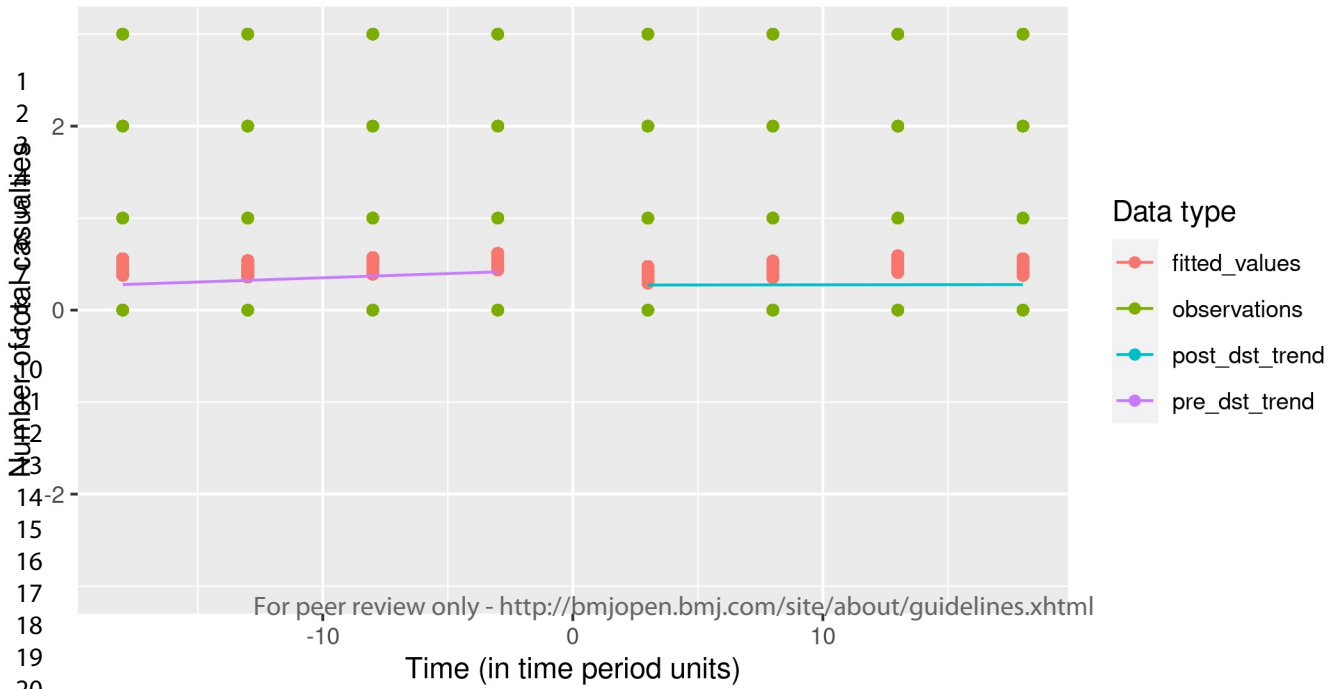

# Spring total casualties, northings, band 1000 - 2000, time period 5

BMJ Open

1  
2  
9  
6  
3  
11  
23  
3  
14  
15  
16  
17  
18  
19  
20

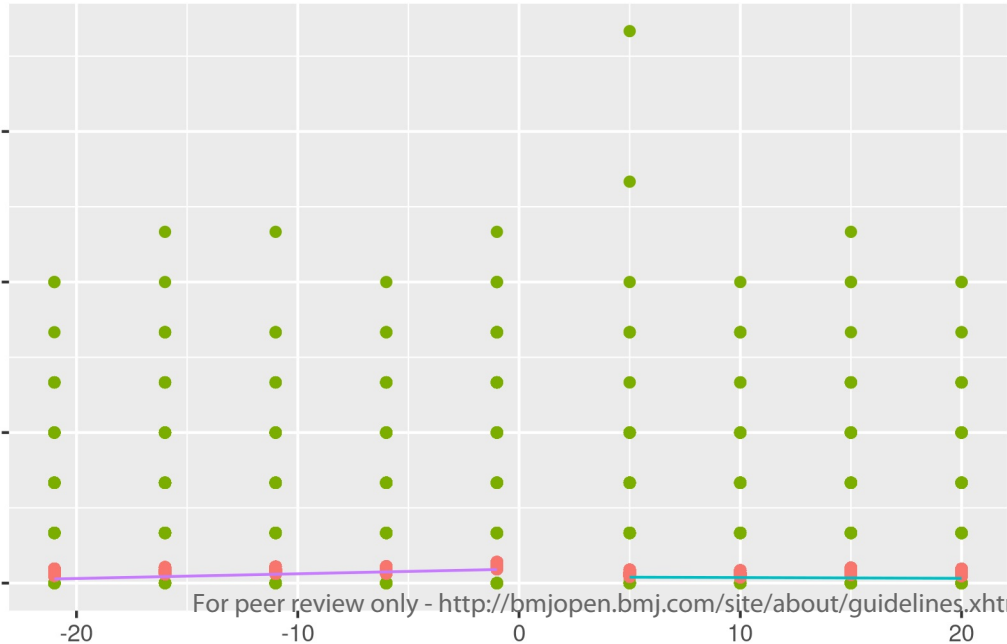

Data type

- fitted\_values
- observations
- post\_dst\_trend
- pre\_dst\_trend

For peer review only - <http://bmjopen.bmj.com/site/about/guidelines.xhtml>

1  
2  
3  
4  
5  
6  
7  
8  
9  
10  
11  
12  
13  
14  
15  
16  
17  
18  
19  
20

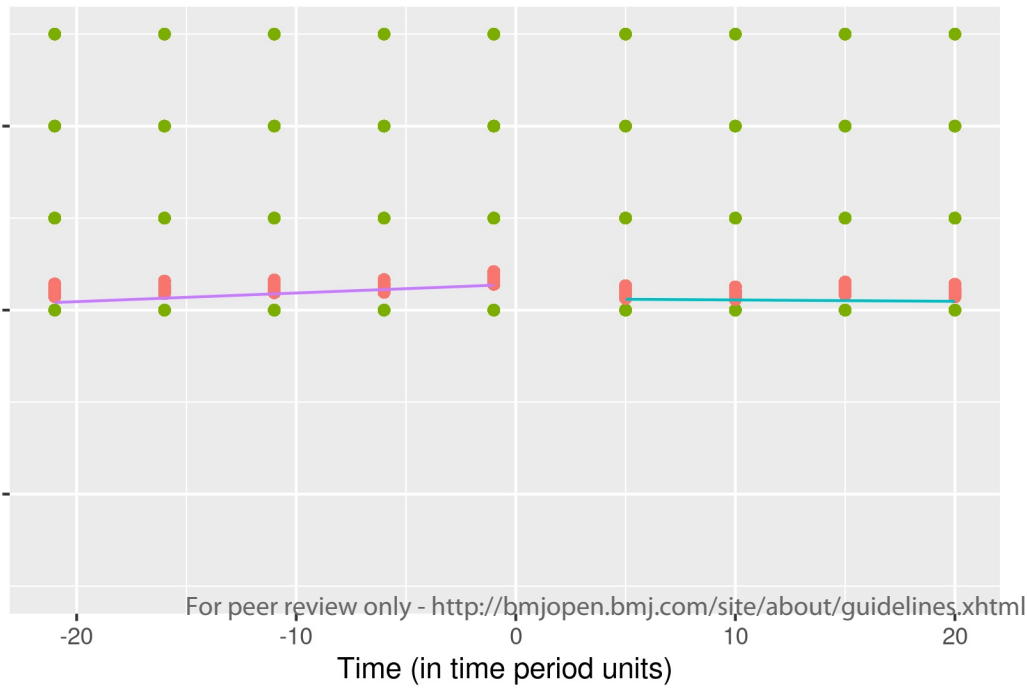

Data type

- fitted\_values
- observations
- post\_dst\_trend
- pre\_dst\_trend

BMJ Open

1  
2  
3  
4  
5  
6  
7  
8  
9  
10  
11  
12  
13  
14  
15  
16  
17  
18  
19  
20

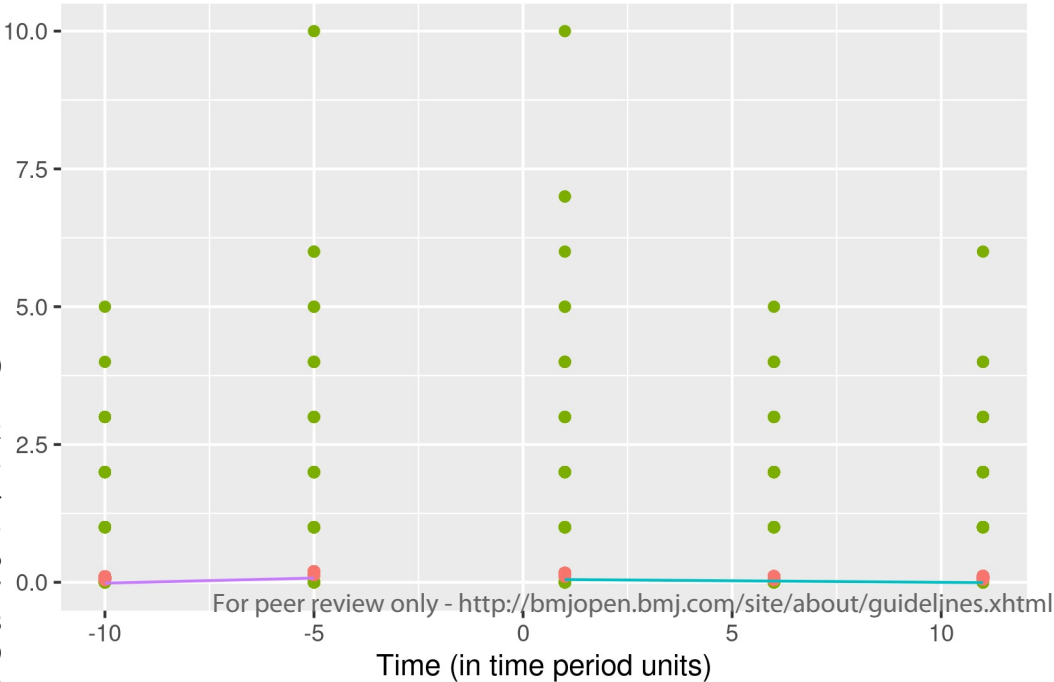

For peer review only - <http://bmjopen.bmj.com/site/about/guidelines.xhtml>

1  
2  
3  
4  
5  
6  
7  
8  
9  
10  
11  
12  
13  
14  
15  
16  
17  
18  
19  
20

Number of total casualties

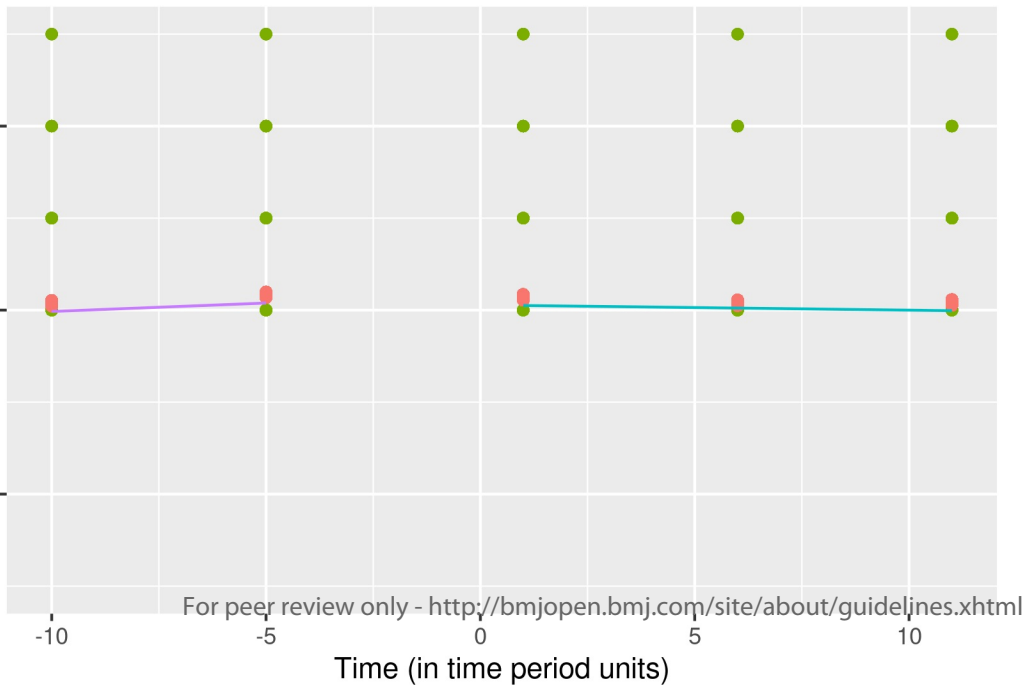

# Spring total casualties, northings, band 1000 - 2000, time period 4

BMJ Open

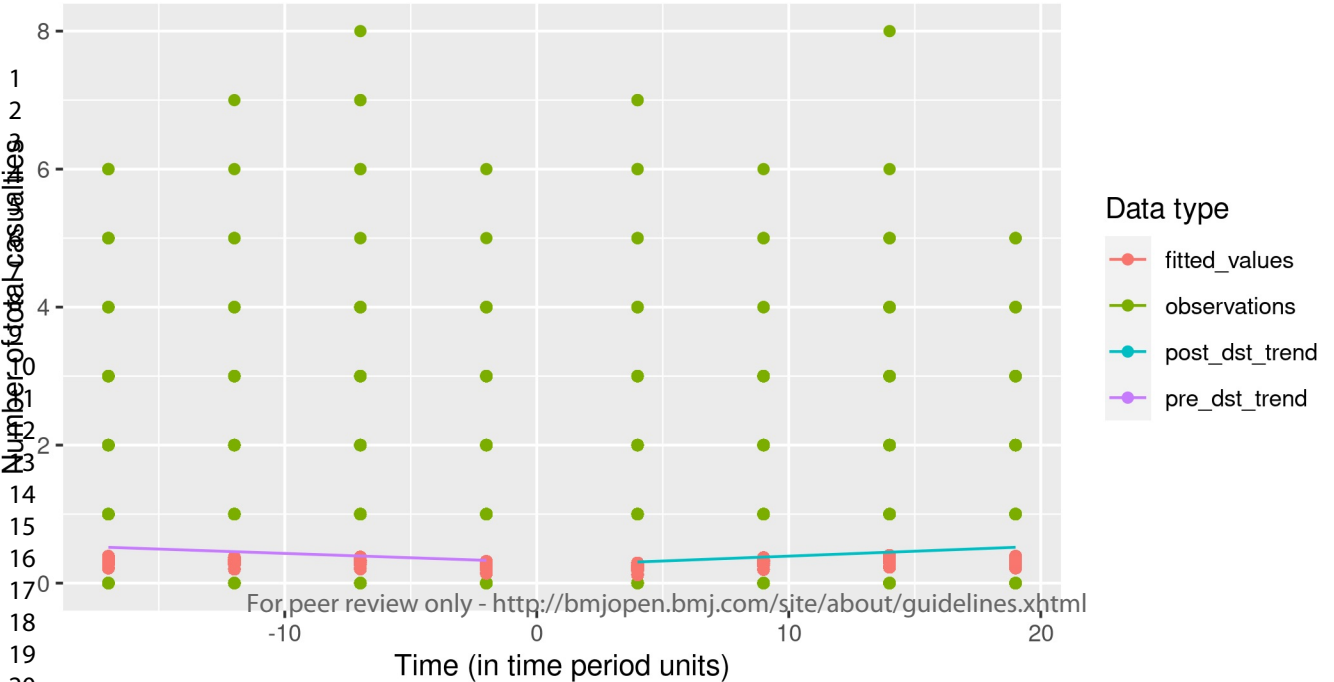

1  
2  
3  
4  
5  
6  
7  
8  
9  
10  
11  
12  
13  
14  
15  
16  
17  
18  
19  
20

For peer review only - <http://bmjopen.bmj.com/site/about/guidelines.xhtml>



1  
2  
3  
4  
5  
6  
7  
8  
9  
10  
11  
12  
13  
14  
15  
16  
17  
18  
19  
20

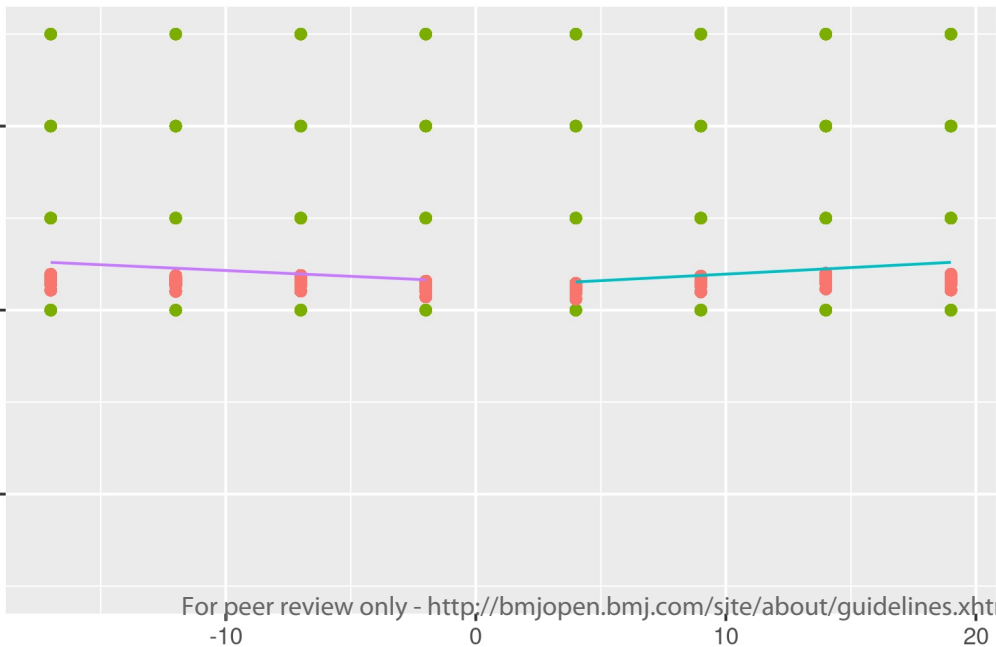

1  
2  
3  
4  
5  
6  
7  
8  
9  
10  
11  
12  
13  
14  
15  
16  
17  
18  
19  
20

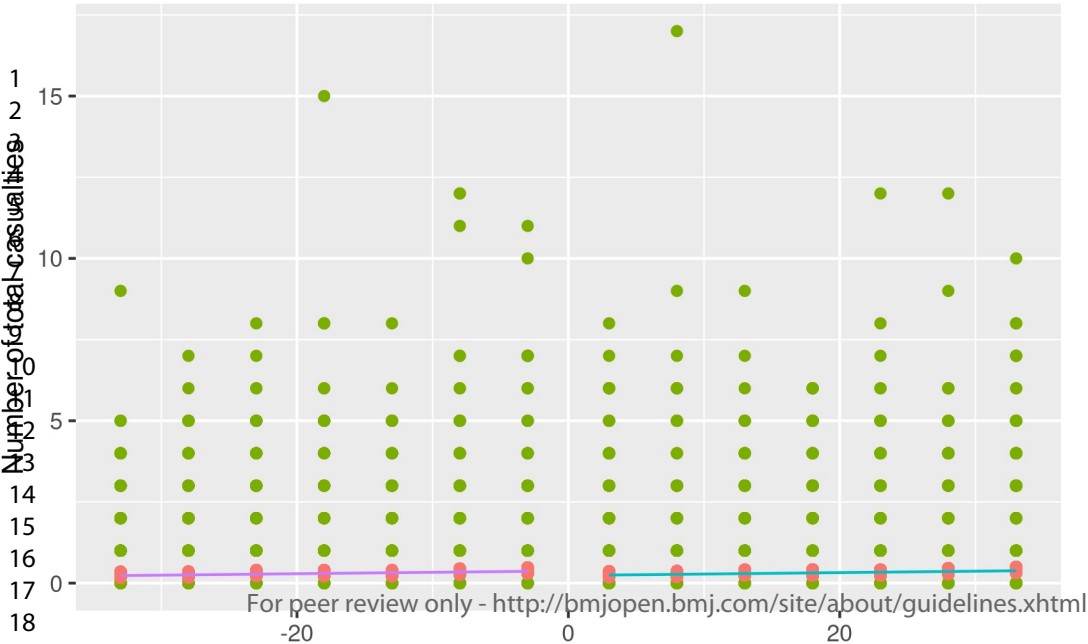

1  
2  
3  
4  
5  
6  
7  
8  
9  
10  
11  
12  
13  
14  
15  
16  
17  
18  
19  
20

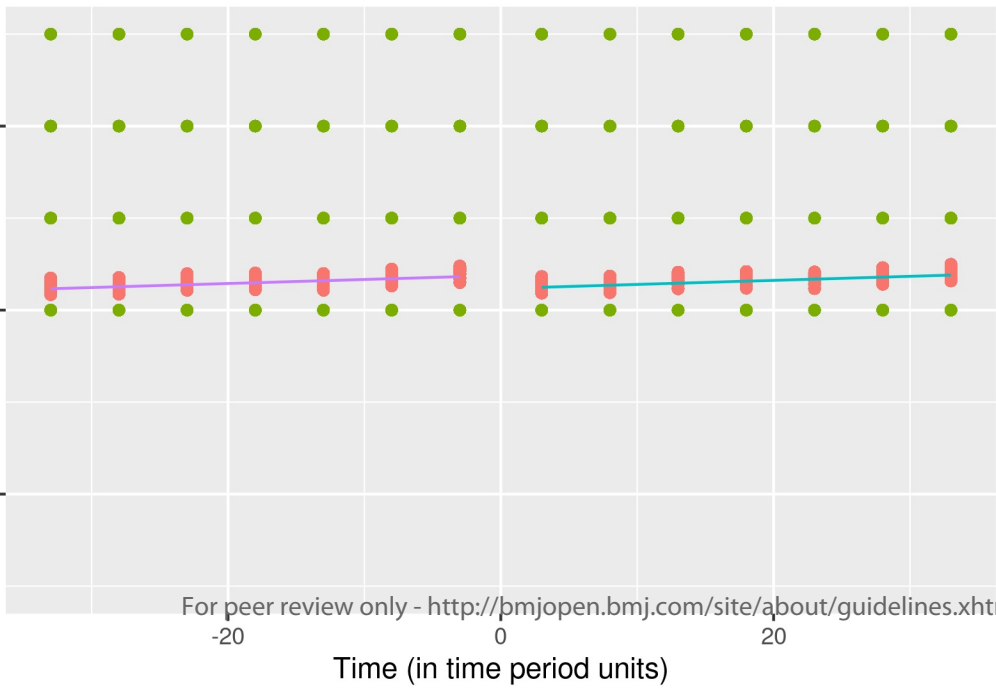

# Spring total casualties, northings, band 3000 - 4000, time period 3

BMJ Open

1  
2  
3  
4  
5  
6  
7  
8  
9  
10  
11  
12  
13  
14  
15  
16  
17  
18  
19  
20

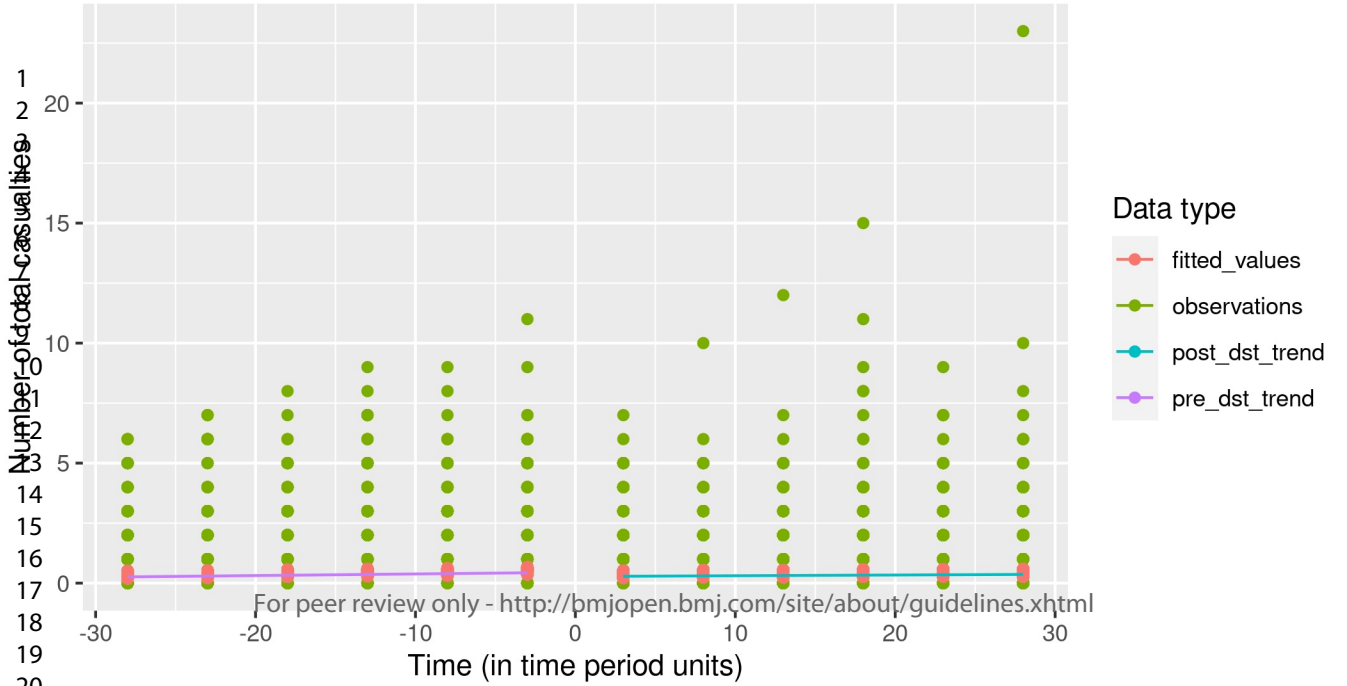

1  
2  
3  
4  
5  
6  
7  
8  
9  
10  
11  
12  
13  
14  
15  
16  
17  
18  
19  
20

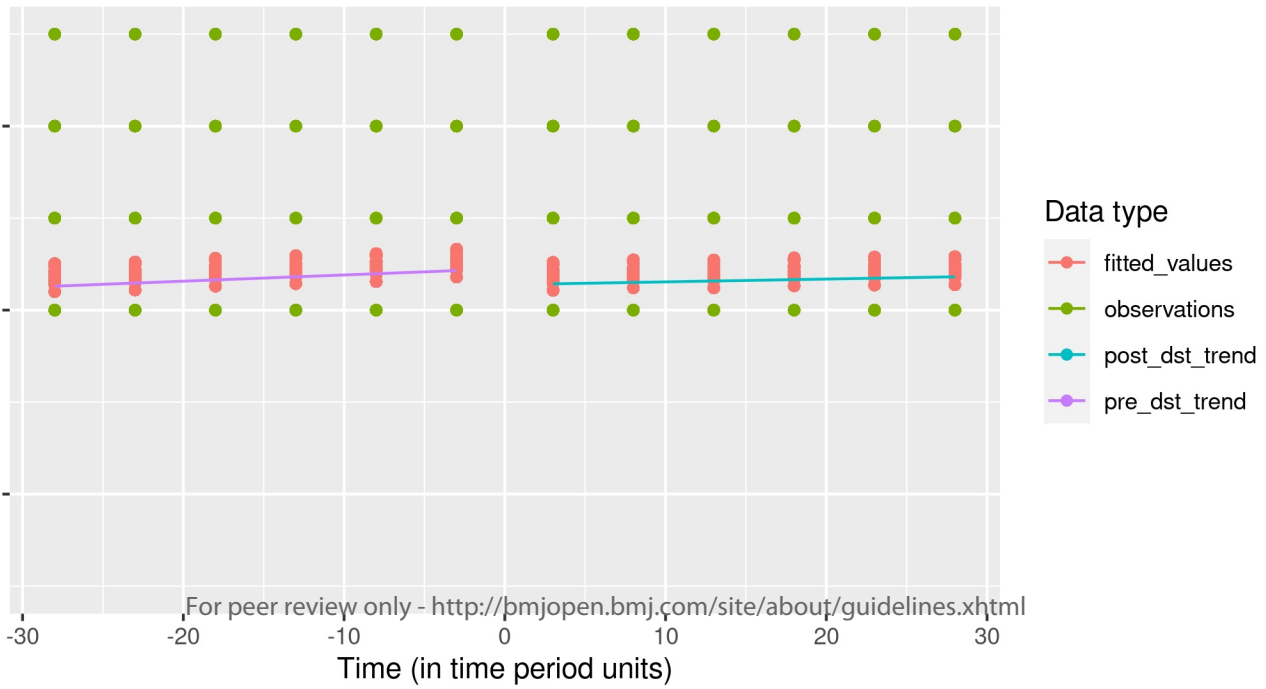

Data type

- fitted\_values
- observations
- post\_dst\_trend
- pre\_dst\_trend

1  
2  
3  
4  
5  
6  
7  
8  
9  
10  
11  
12  
13  
14  
15  
16  
17  
18  
19  
20

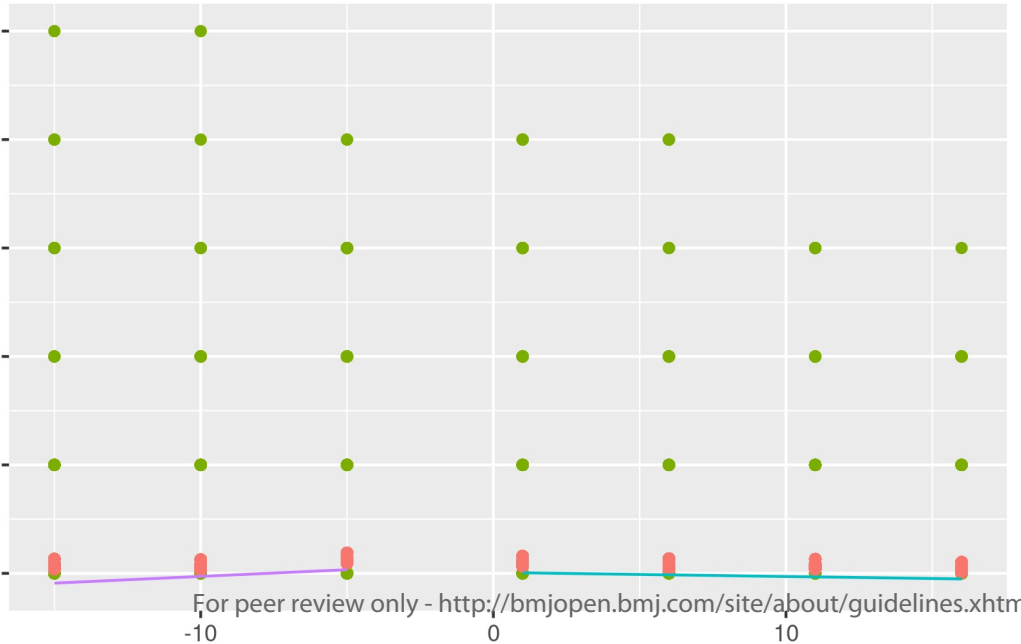

1  
2  
3  
4  
5  
6  
7  
8  
9  
10  
11  
12  
13  
14  
15  
16  
17  
18  
19  
20

Number of total casualties

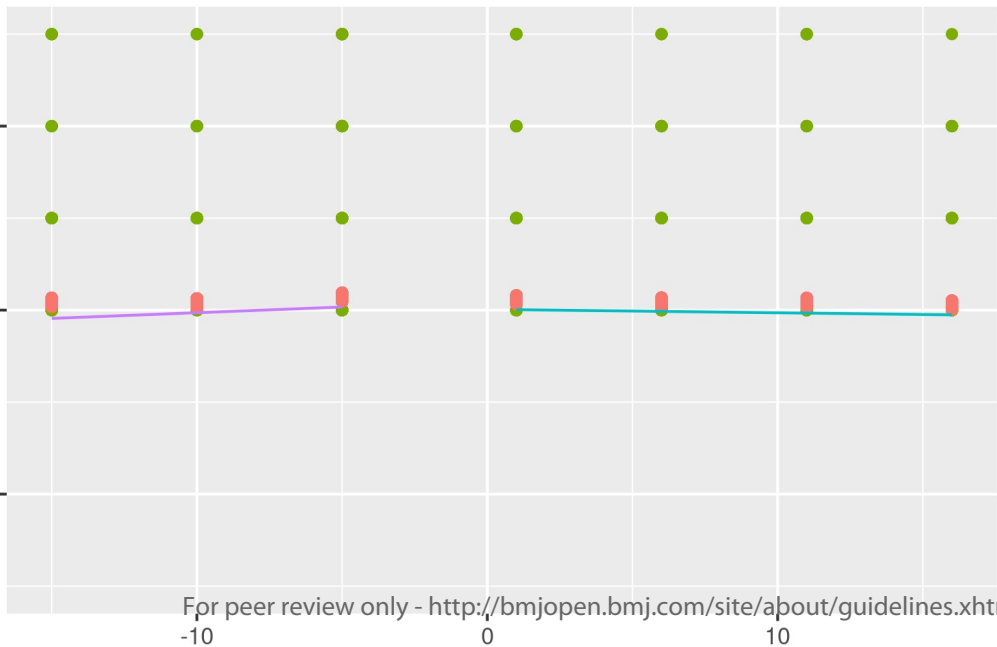

1  
2  
3  
4  
5  
6  
7  
8  
9  
10  
11  
12  
13  
14  
15  
16  
17  
18  
19  
20

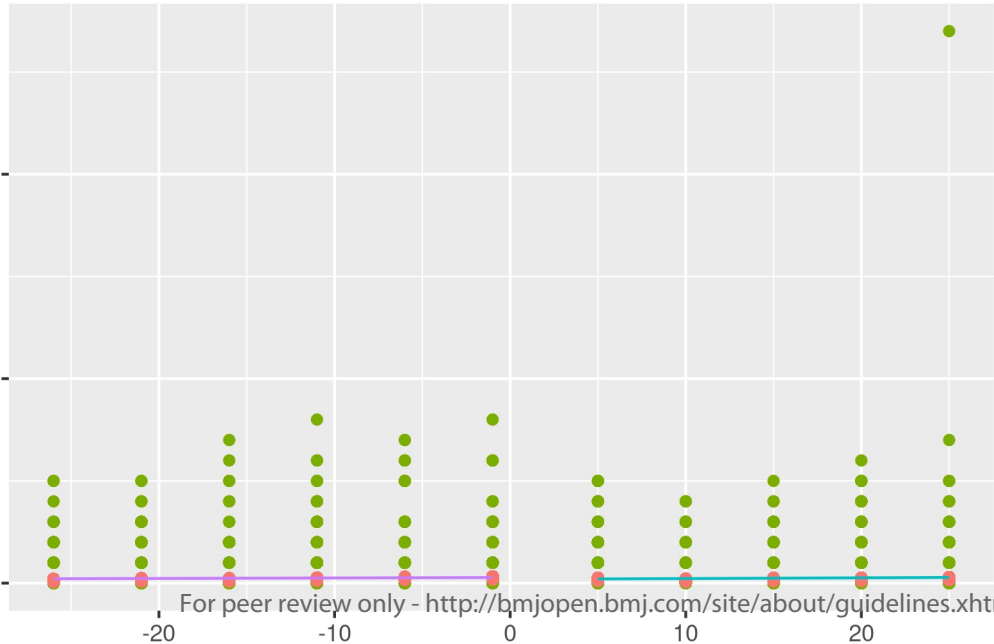

### Data type

- fitted\_values
- observations
- post\_dst\_trend
- pre\_dst\_trend

For peer review only - <http://bmjopen.bmj.com/site/about/guidelines.xhtml>



1  
2  
3  
4  
5  
6  
7  
8  
9  
10  
11  
12  
13  
14  
15  
16  
17  
18  
19  
20

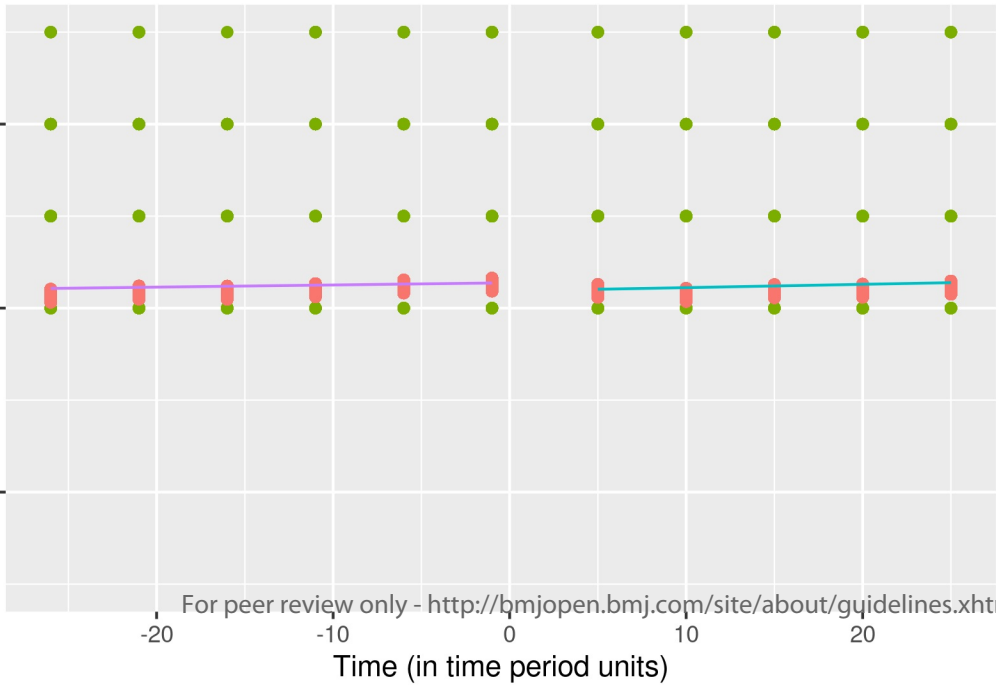

# Spring fatalities, northings, band 3000 - 4000, time period 1

BMJ Open

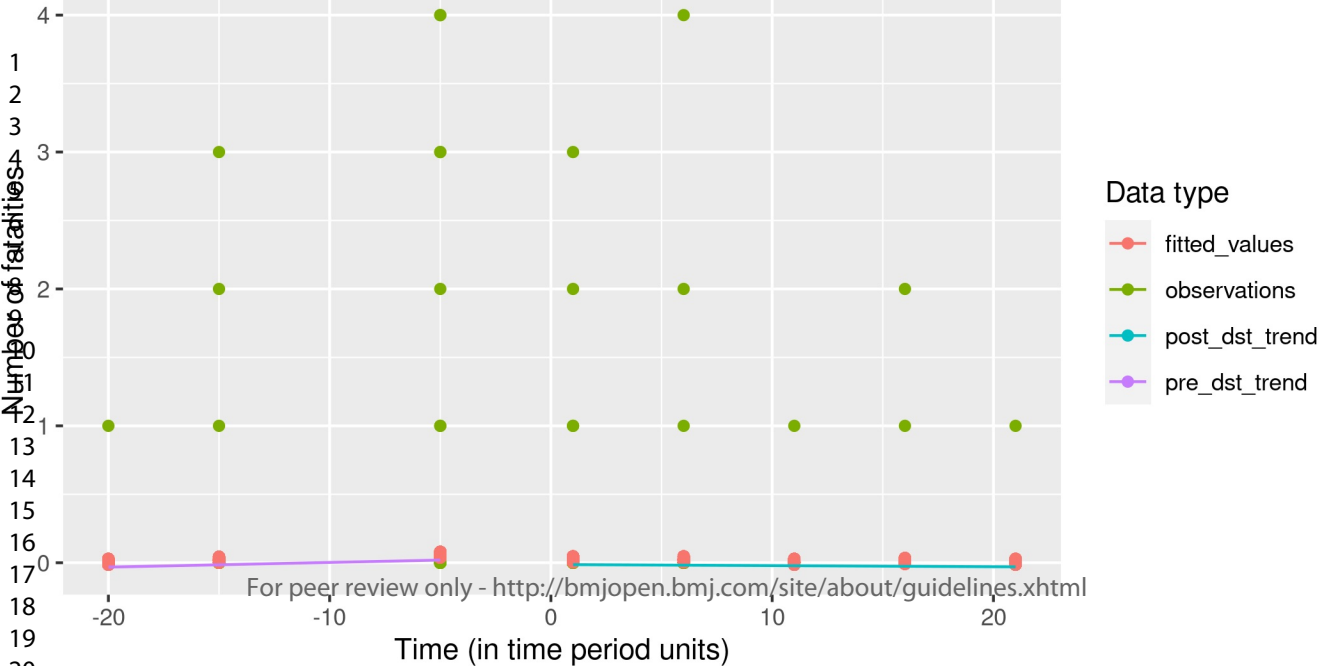

For peer review only - <http://bmjopen.bmj.com/site/about/guidelines.xhtml>

1  
2  
3  
4  
5  
6  
7  
8  
9  
10  
11  
12  
13  
14  
15  
16  
17  
18  
19  
20

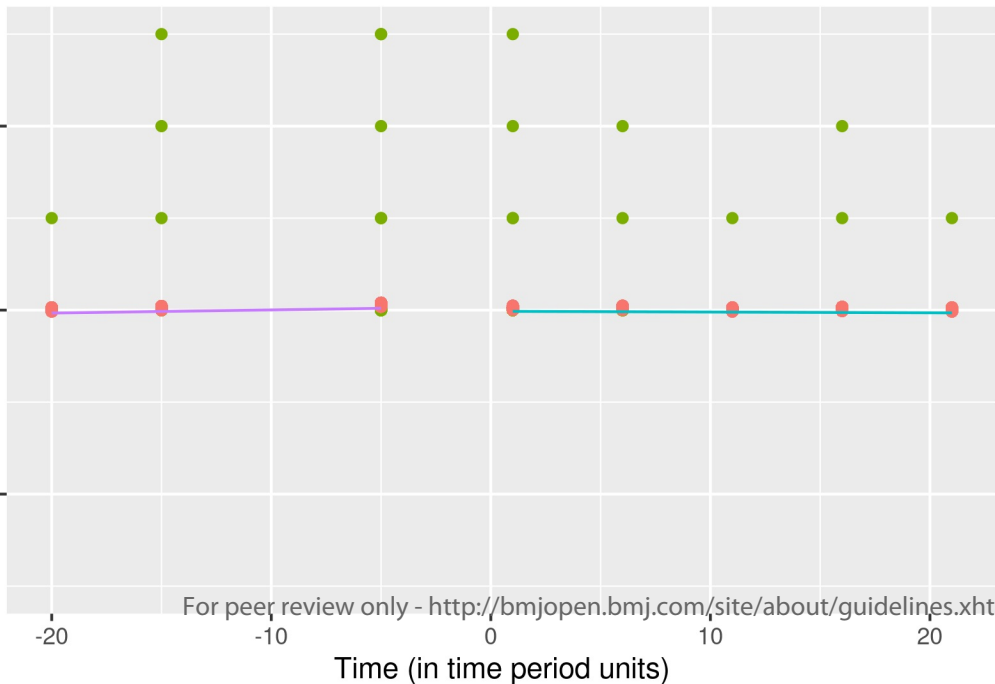

Data type

- fitted\_values
- observations
- post\_dst\_trend
- pre\_dst\_trend

1  
2  
3  
4  
5  
6  
7  
8  
9  
10  
11  
12  
13  
14  
15  
16  
17  
18  
19  
20

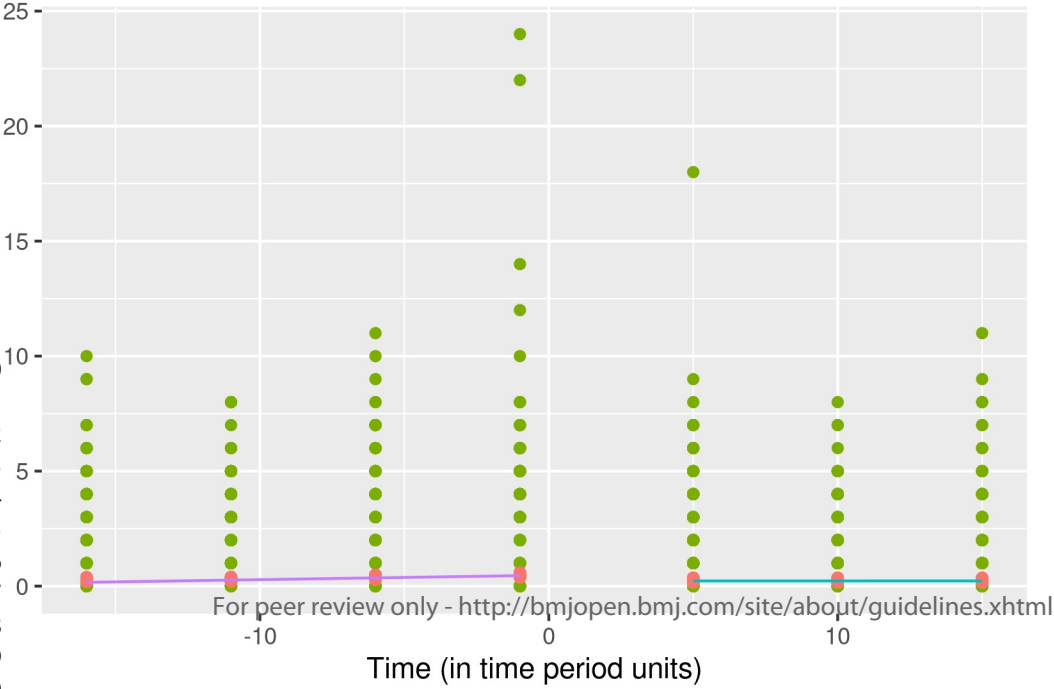

BMJ Open

1  
2  
3  
4  
5  
6  
7  
8  
9  
10  
11  
12  
13  
14  
15  
16  
17  
18  
19  
20

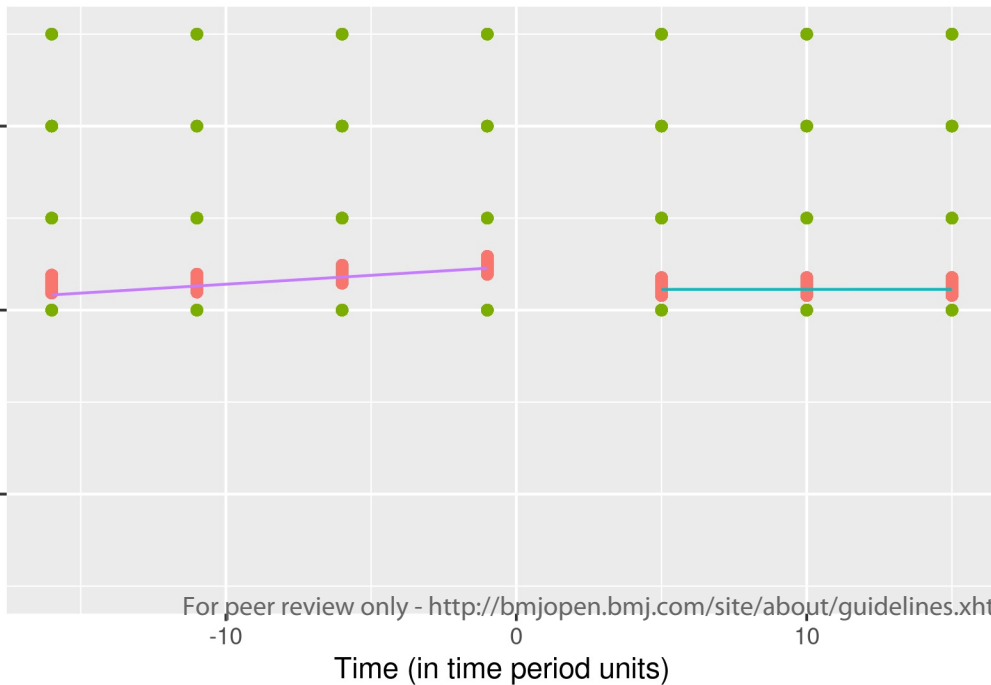

# Autumn total casualties, aggregate, time period 1

BMJ Open

1  
2  
10  
5  
0  
1  
2  
3  
14  
15  
16  
17  
18  
19  
20

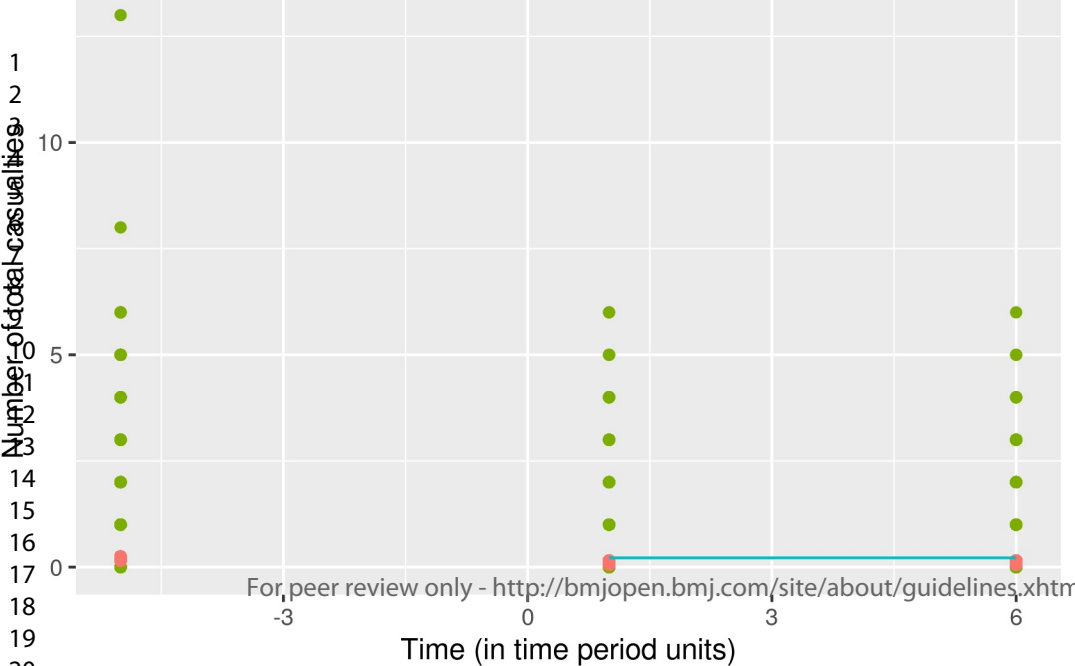

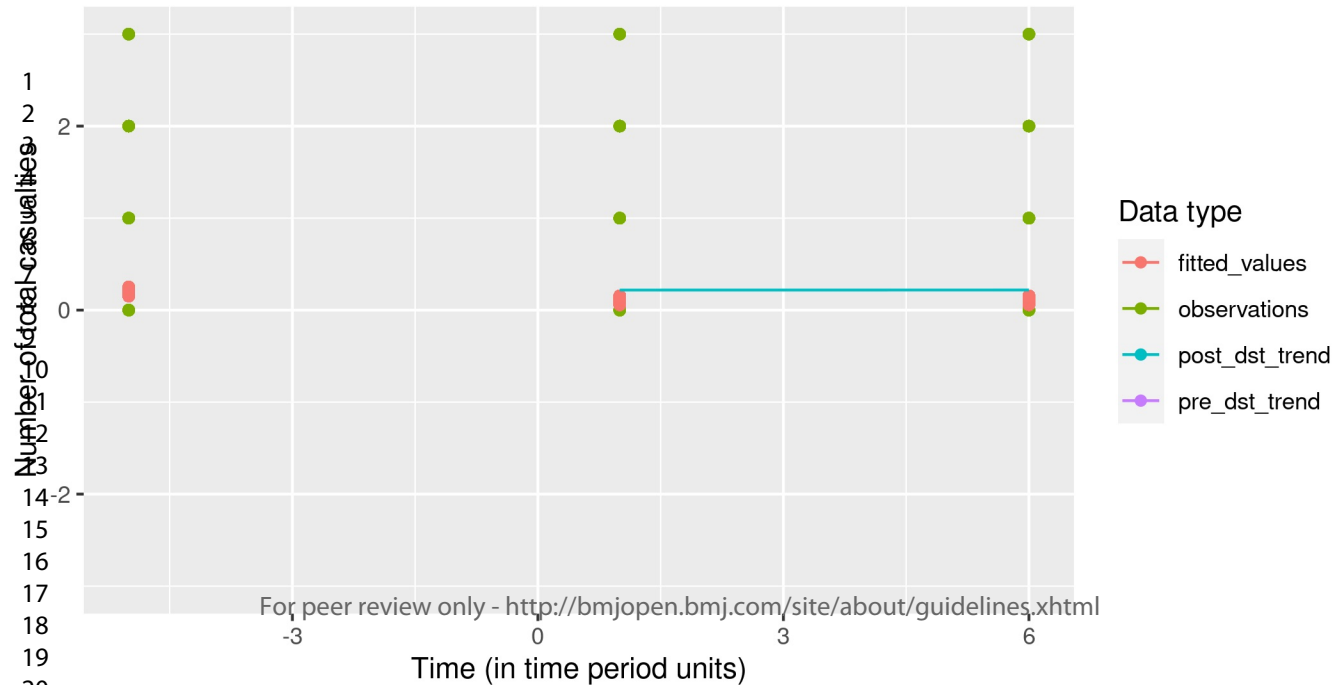

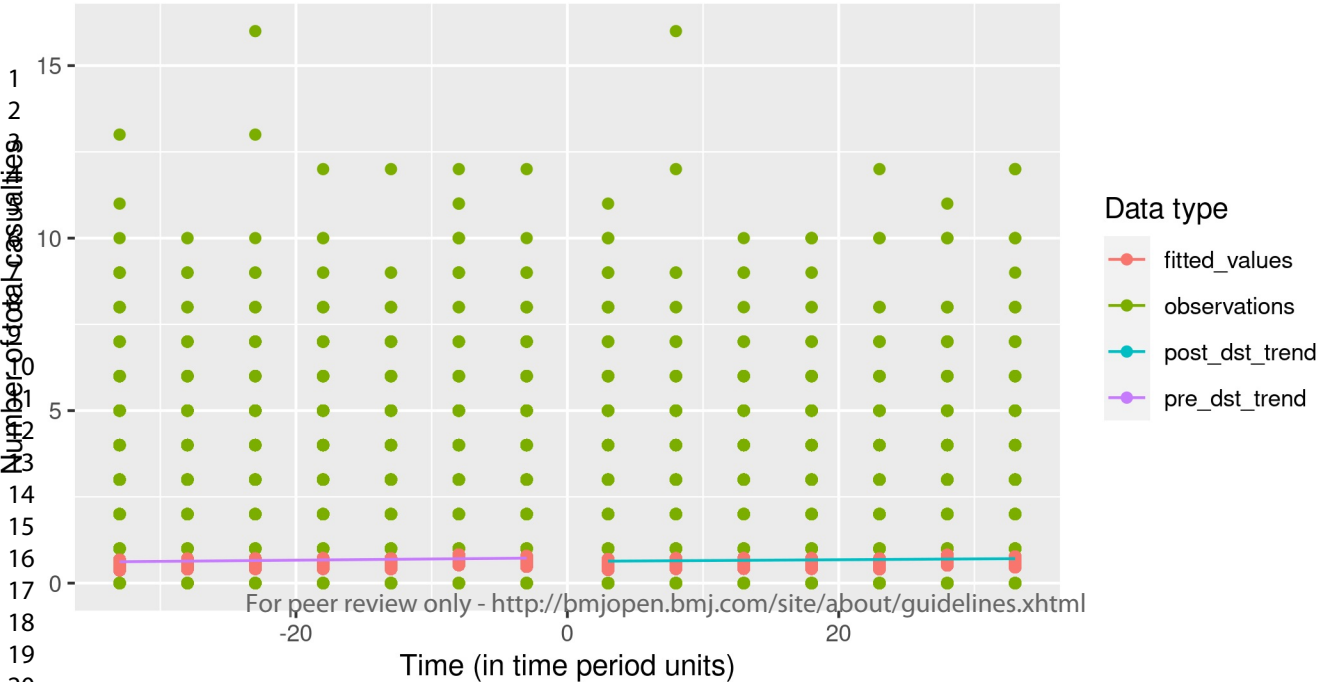



BMJ Open

1  
2  
3  
4  
5  
6  
7  
8  
9  
10  
11  
12  
13  
14  
15  
16  
17  
18  
19  
20

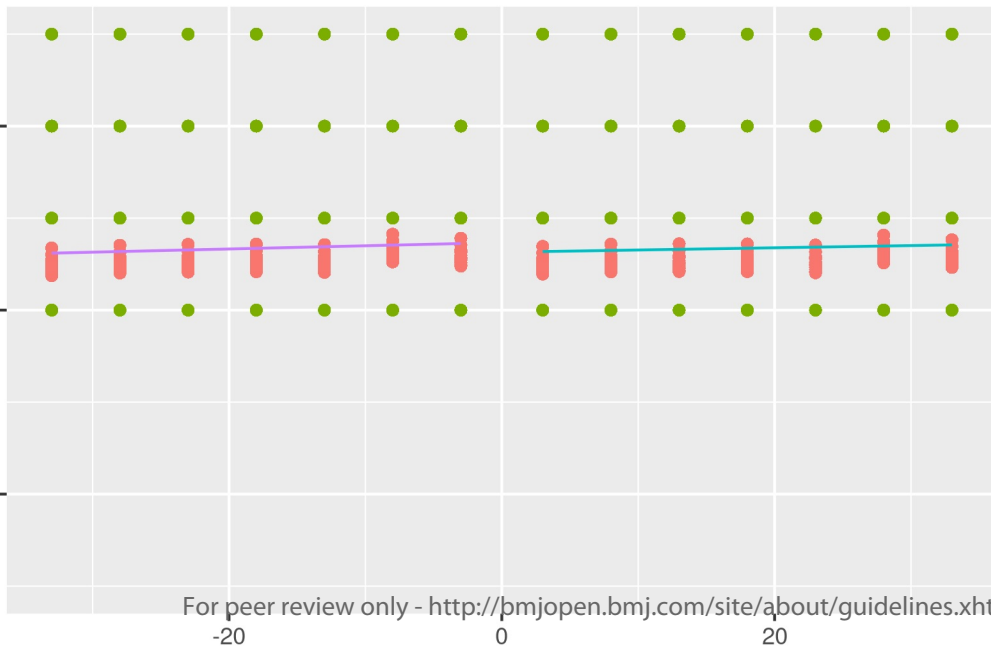

# Autumn total casualties, aggregate, time period 4

BMJ Open

1  
2  
10  
5  
3  
14  
15  
16  
17  
18  
19  
20

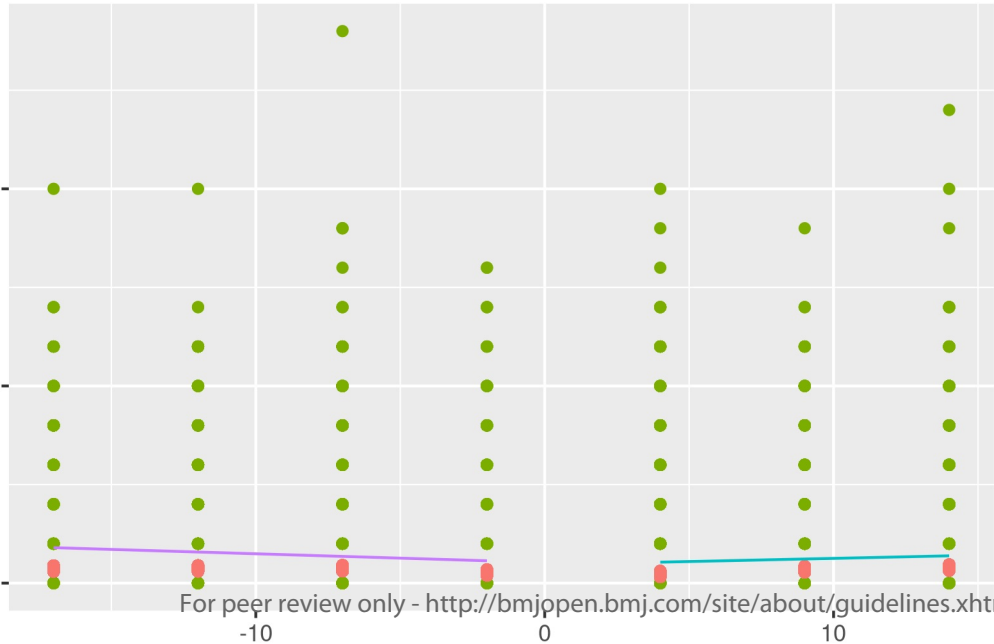

For peer review only - <http://bmjopen.bmj.com/site/about/guidelines.xhtml>

### Data type

- fitted\_values
- observations
- post\_dst\_trend
- pre\_dst\_trend

BMJ Open

1  
2  
3  
4  
5  
6  
7  
8  
9  
10  
11  
12  
13  
14  
15  
16  
17  
18  
19  
20

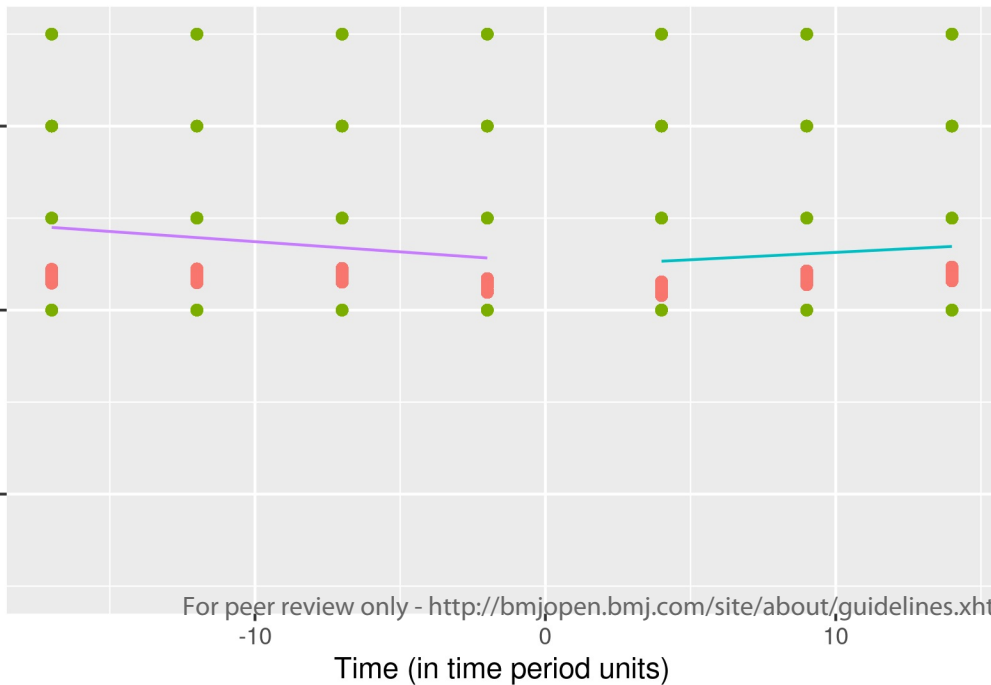

1  
2  
3  
4  
5  
6  
7  
8  
9  
10  
11  
12  
13  
14  
15  
16  
17  
18  
19  
20

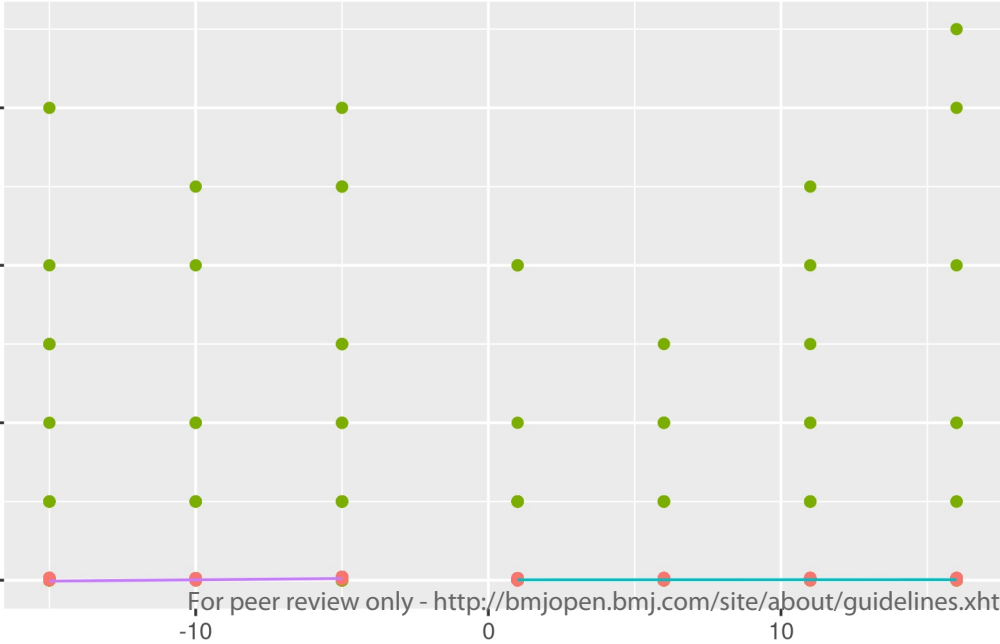

### Data type

- fitted\_values
- observations
- post\_dst\_trend
- pre\_dst\_trend

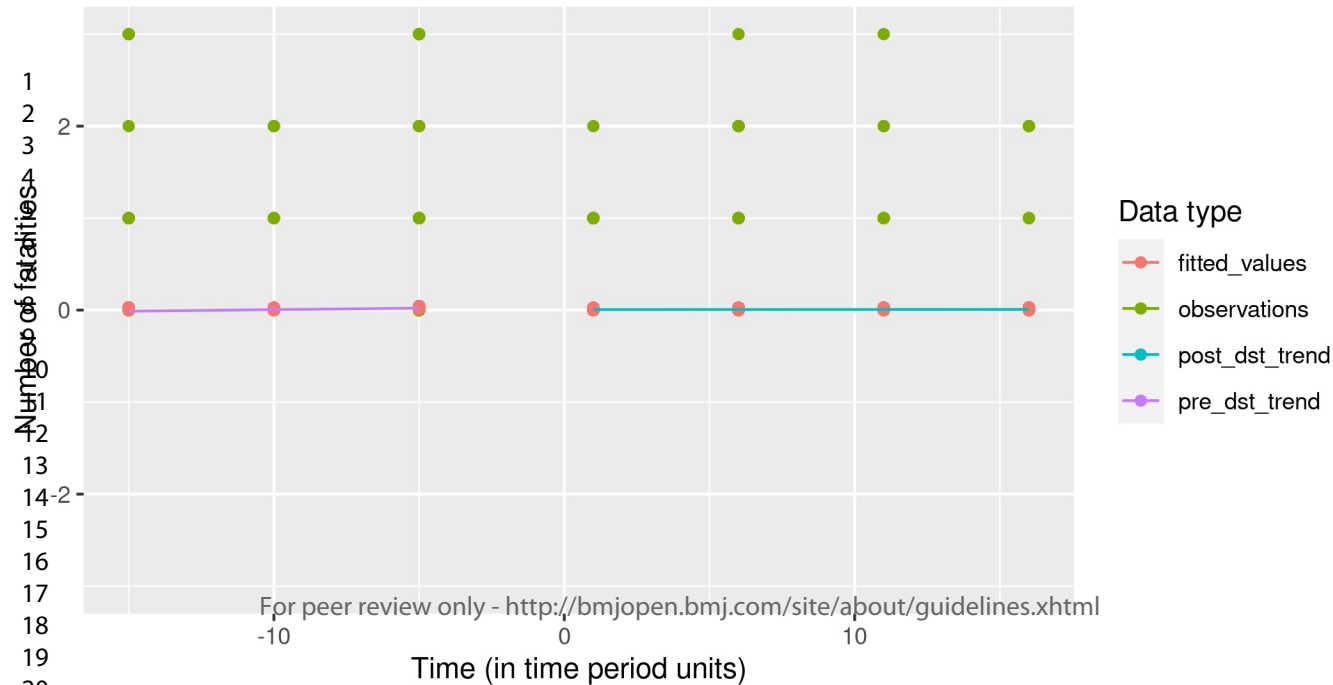

1  
2  
3  
4  
0  
1  
2  
3  
4  
5  
6  
7  
8  
9  
10  
11  
12  
13  
14  
15  
16  
17  
18  
19  
20

1  
2  
3  
4  
5  
6  
7  
8  
9  
10  
11  
12  
13  
14  
15  
16  
17  
18  
19  
20

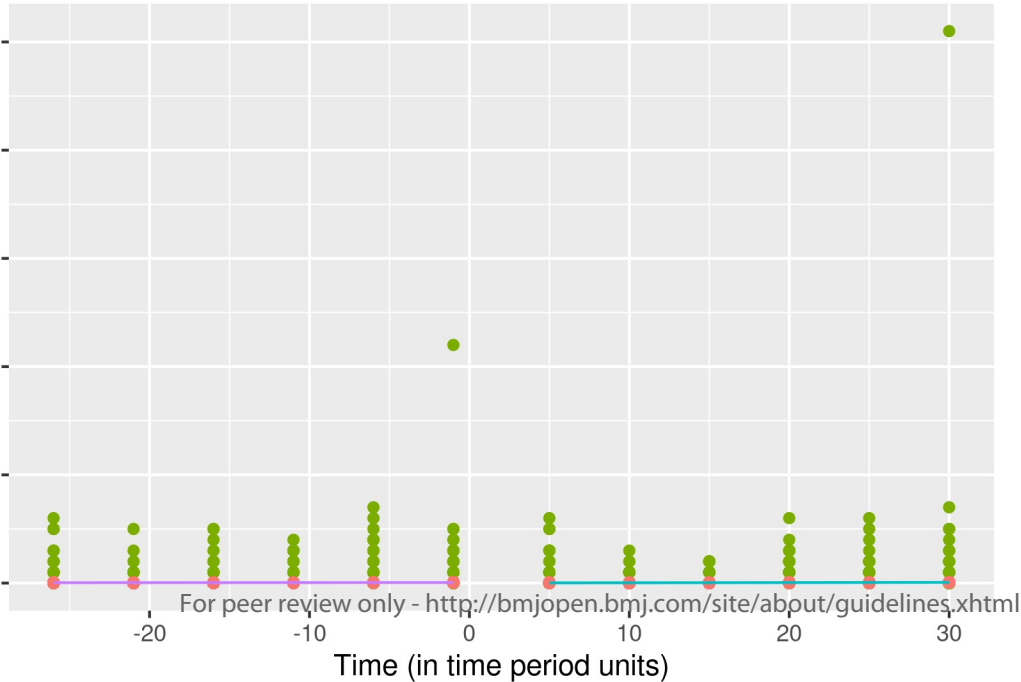



# Autumn total casualties, eastings, band 1000 - 2000, time period 1

1  
2  
3  
4  
5  
6  
7  
8  
9  
10  
11  
12  
13  
14  
15  
16  
17  
18  
19  
20

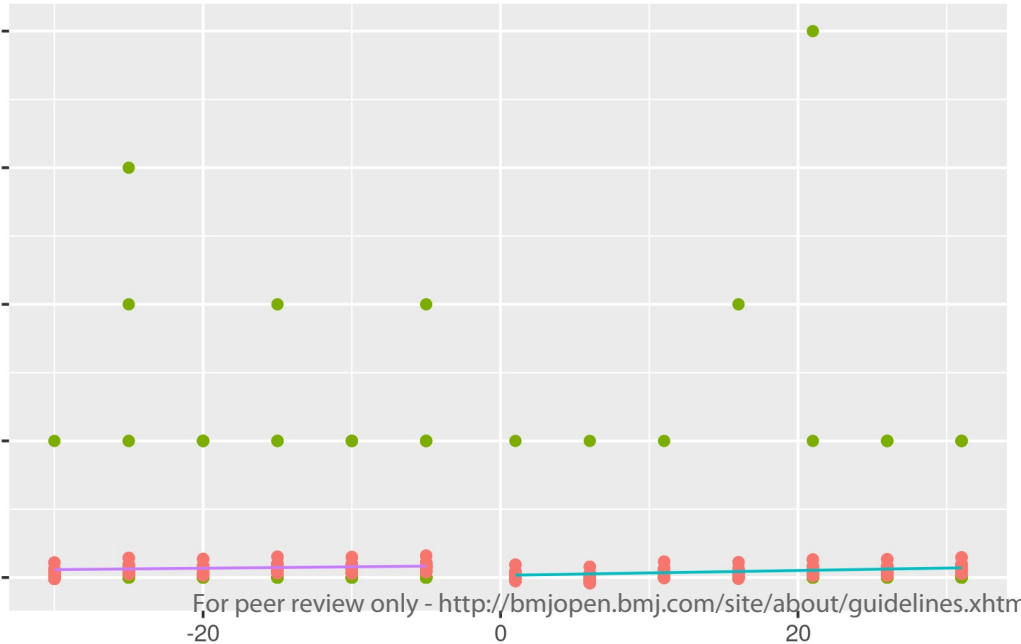

**Data type**

- fitted\_values
- observations
- post\_dst\_trend
- pre\_dst\_trend

For peer review only - <http://bmjopen.bmj.com/site/about/guidelines.xhtml>



1  
2  
3  
4  
5  
6  
7  
8  
9  
10  
11  
12  
13  
14  
15  
16  
17  
18  
19  
20

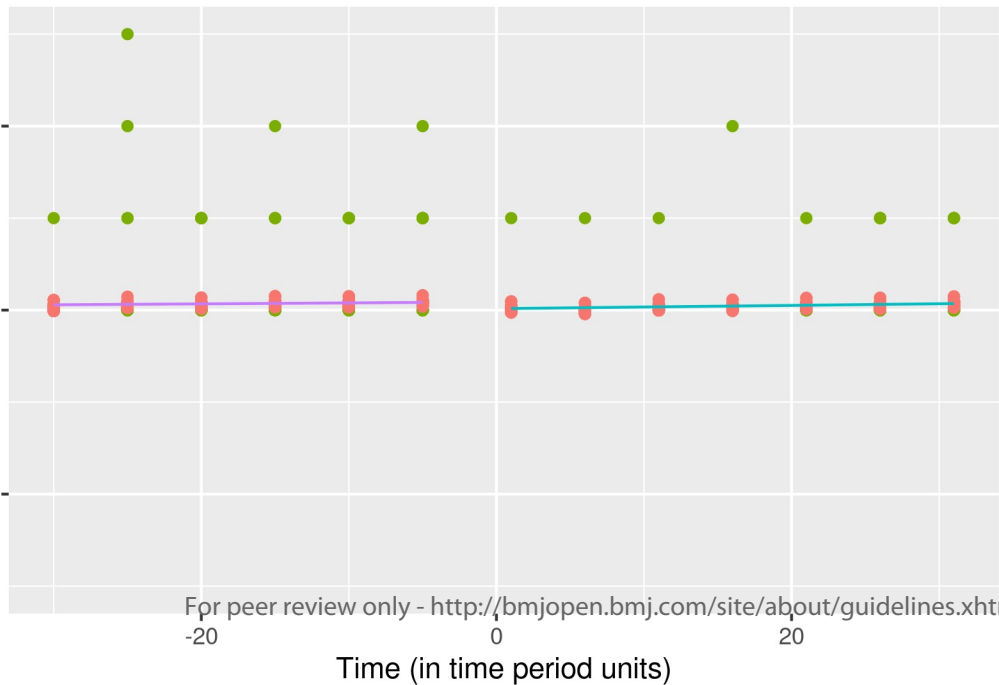

Data type

- fitted\_values
- observations
- post\_dst\_trend
- pre\_dst\_trend

1  
2  
3  
4  
5  
6  
7  
8  
9  
10  
11  
12  
13  
14  
15  
16  
17  
18  
19  
20

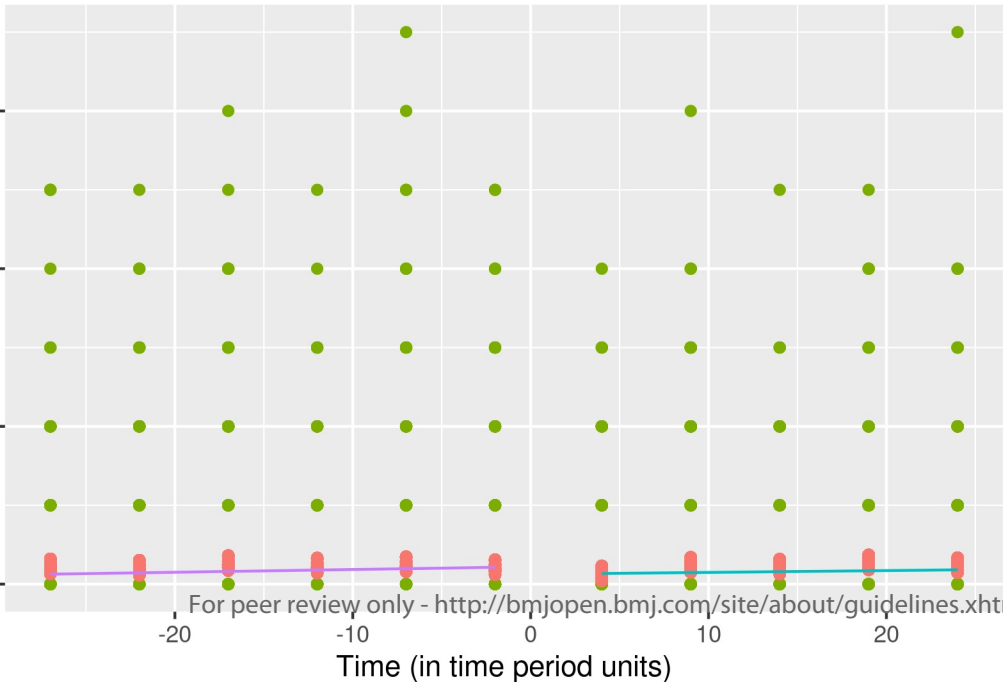

For peer review only - <http://bmjopen.bmj.com/site/about/guidelines.xhtml>

1  
2  
3  
4  
5  
6  
7  
8  
9  
10  
11  
12  
13  
14  
15  
16  
17  
18  
19  
20

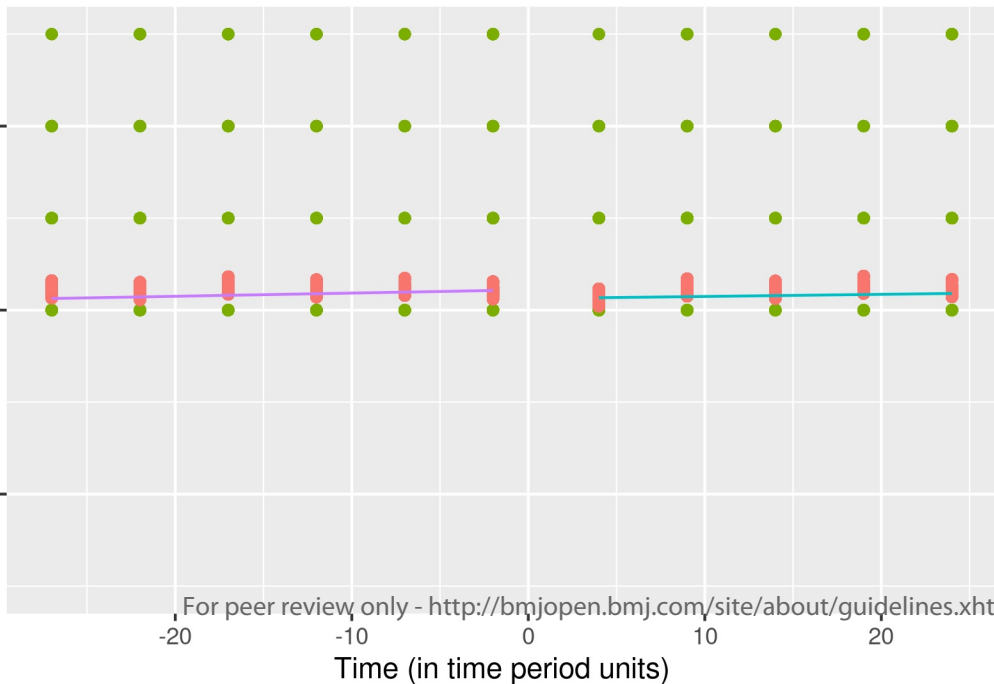

Data type

- fitted\_values
- observations
- post\_dst\_trend
- pre\_dst\_trend

# Autumn total casualties, eastings, band 3000 - 4000, time period 1

BMJ Open

1  
2  
10  
5  
1  
2  
3  
4  
5  
6  
16  
17  
18  
19  
20

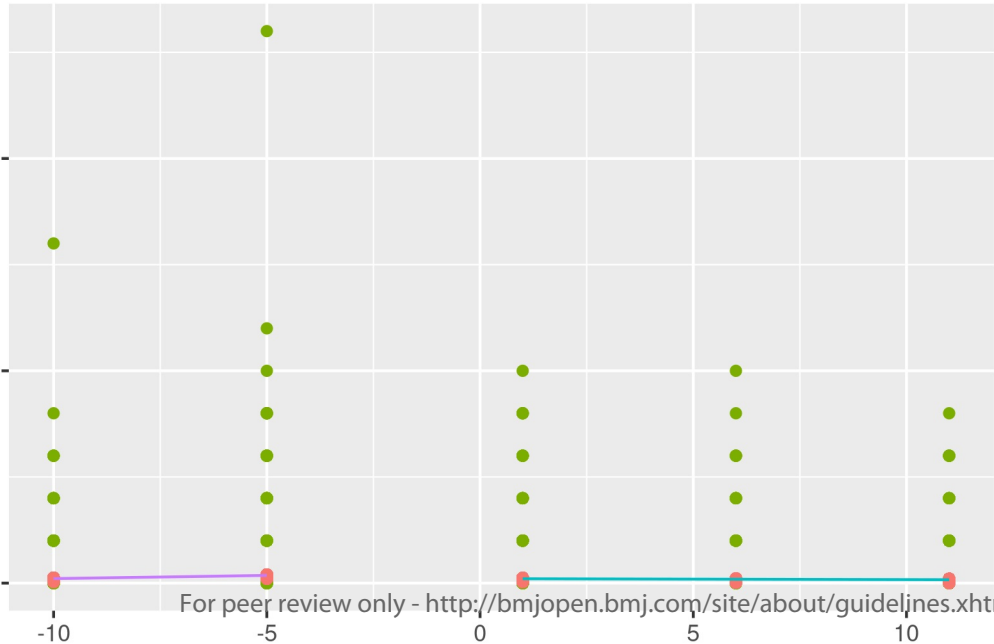

Data type

- fitted\_values
- observations
- post\_dst\_trend
- pre\_dst\_trend

For peer review only - <http://bmjopen.bmj.com/site/about/guidelines.xhtml>

1  
2  
3  
4  
5  
6  
7  
8  
9  
10  
11  
12  
13  
14  
15  
16  
17  
18  
19  
20

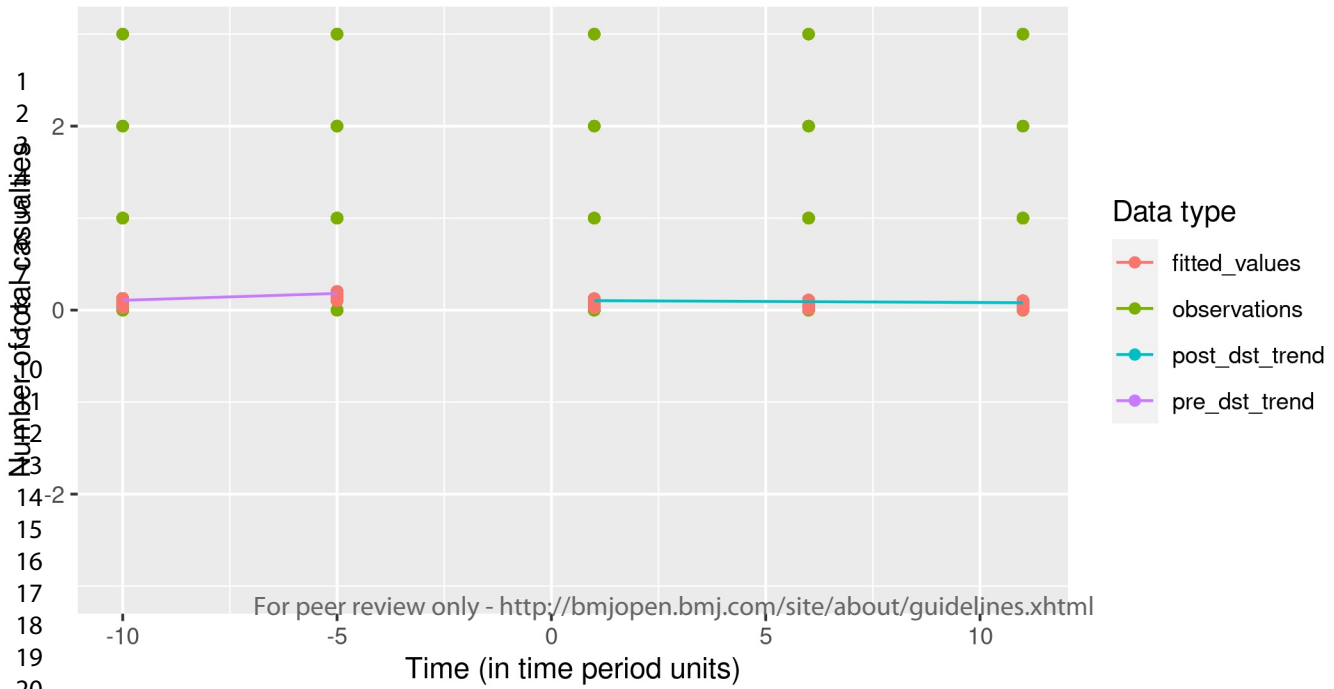

# Autumn total casualties, eastings, band 3000 - 4000, time period 5

BMJ Open

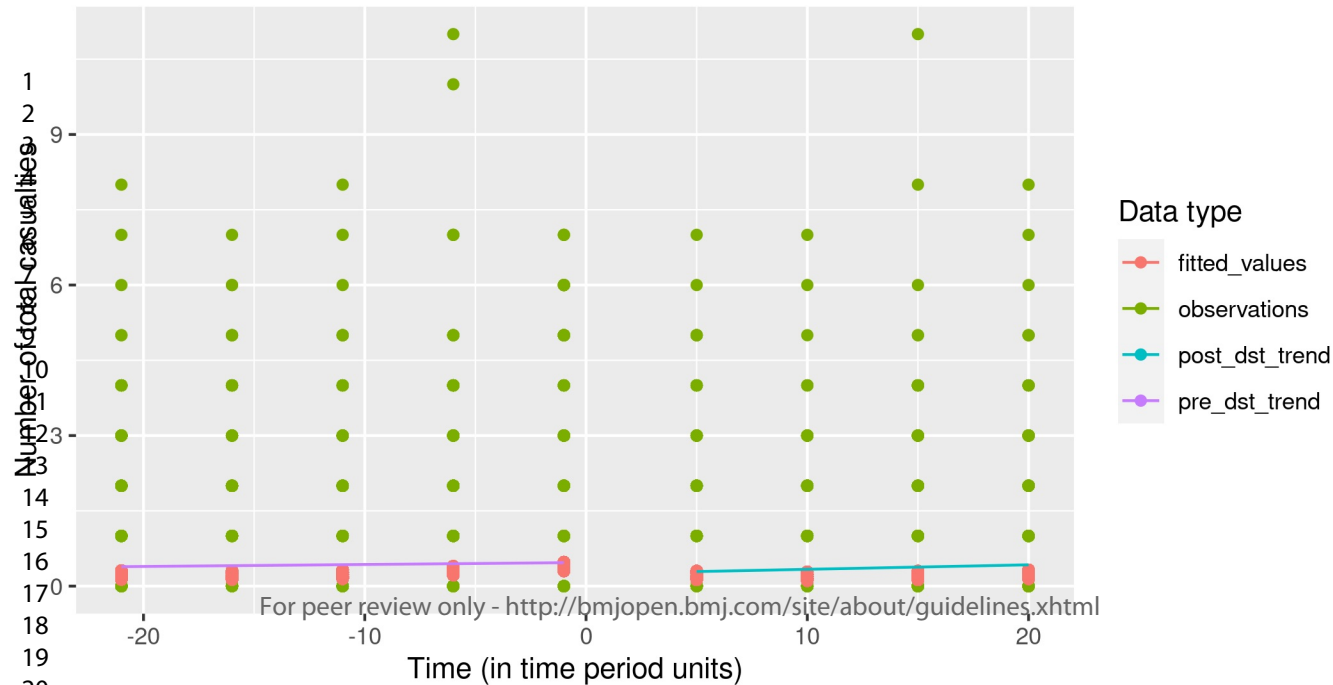

1  
2  
3  
4  
5  
6  
7  
8  
9  
10  
11  
12  
13  
14  
15  
16  
17  
18  
19  
20

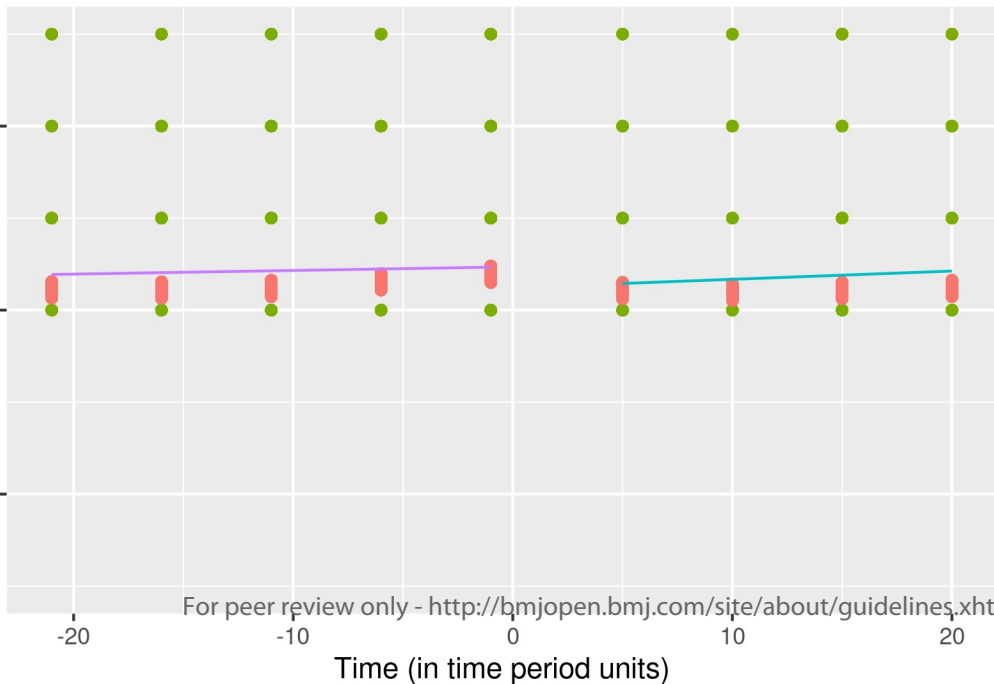

Data type

- fitted\_values
- observations
- post\_dst\_trend
- pre\_dst\_trend

BMJ Open

1  
2  
3  
4  
5  
6  
7  
8  
9  
10  
11  
12  
13  
14  
15  
16  
17  
18  
19  
20

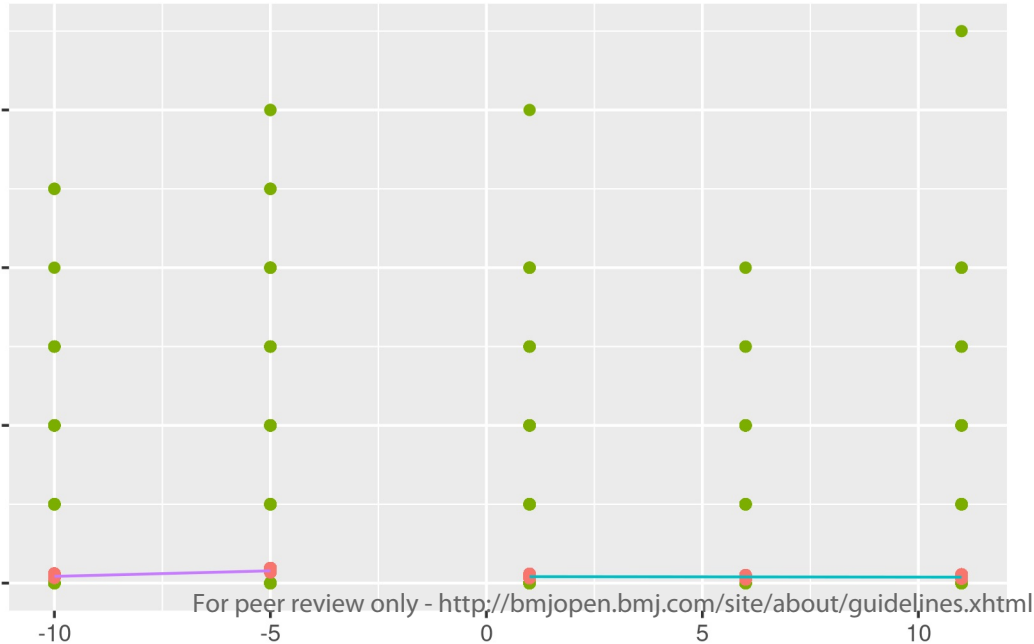

**Data type**

- fitted\_values
- observations
- post\_dst\_trend
- pre\_dst\_trend

For peer review only - <http://bmjopen.bmj.com/site/about/guidelines.xhtml>



1  
2  
3  
4  
5  
6  
7  
8  
9  
10  
11  
12  
13  
14  
15  
16  
17  
18  
19  
20

Number of total casualties

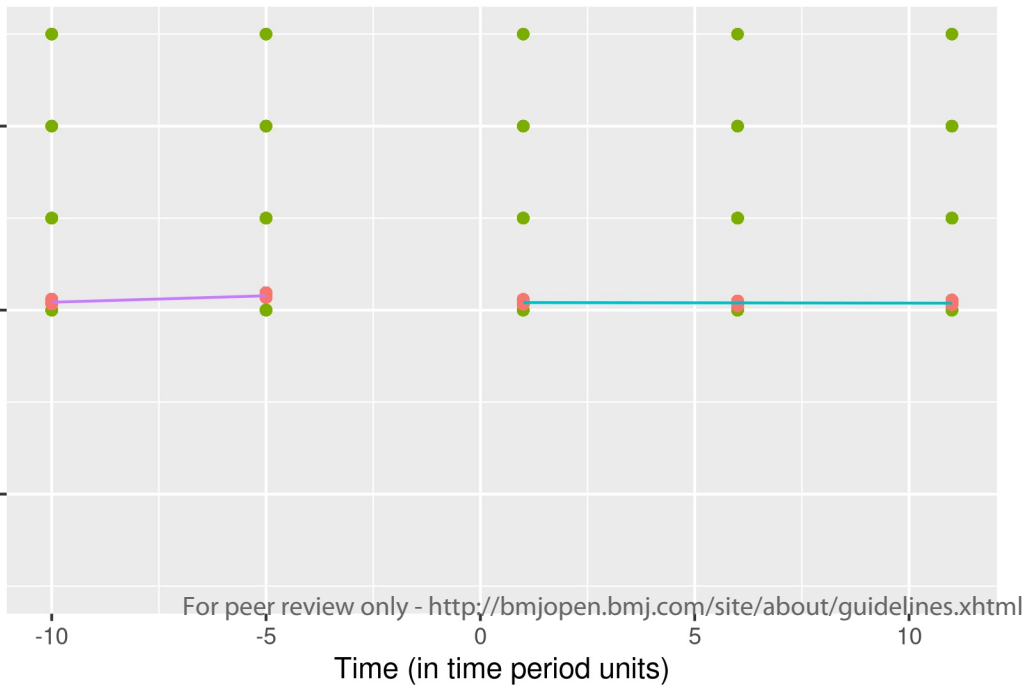

# Autumn total casualties, eastings, band 4000 - 5000, time period 5

1  
2  
10  
5  
3  
14  
15  
16  
17  
18  
19  
20

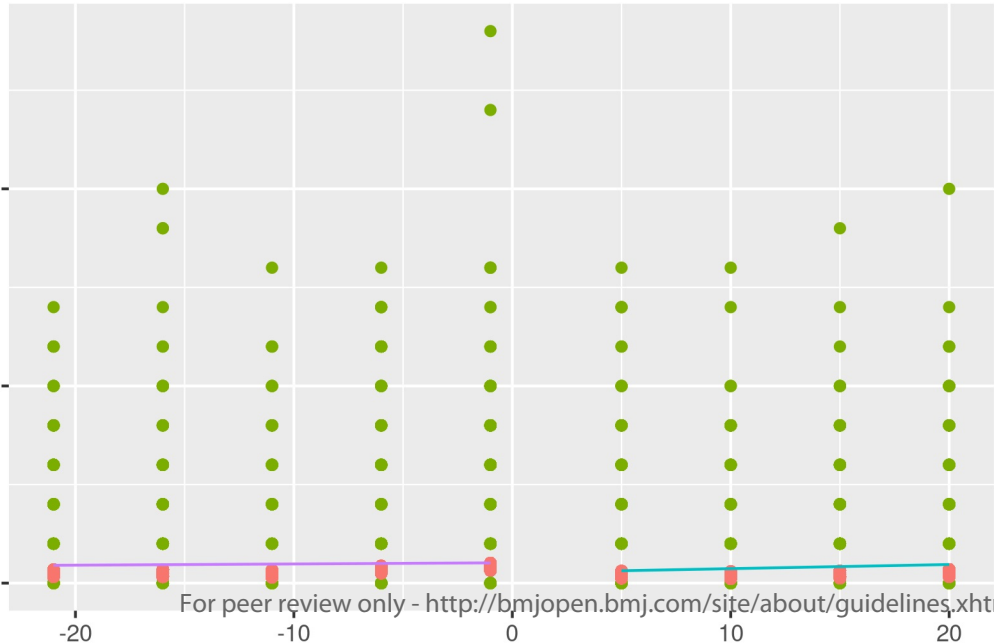

For peer review only - <http://bmjopen.bmj.com/site/about/guidelines.xhtml>

1  
2  
3  
4  
5  
6  
7  
8  
9  
10  
11  
12  
13  
14  
15  
16  
17  
18  
19  
20

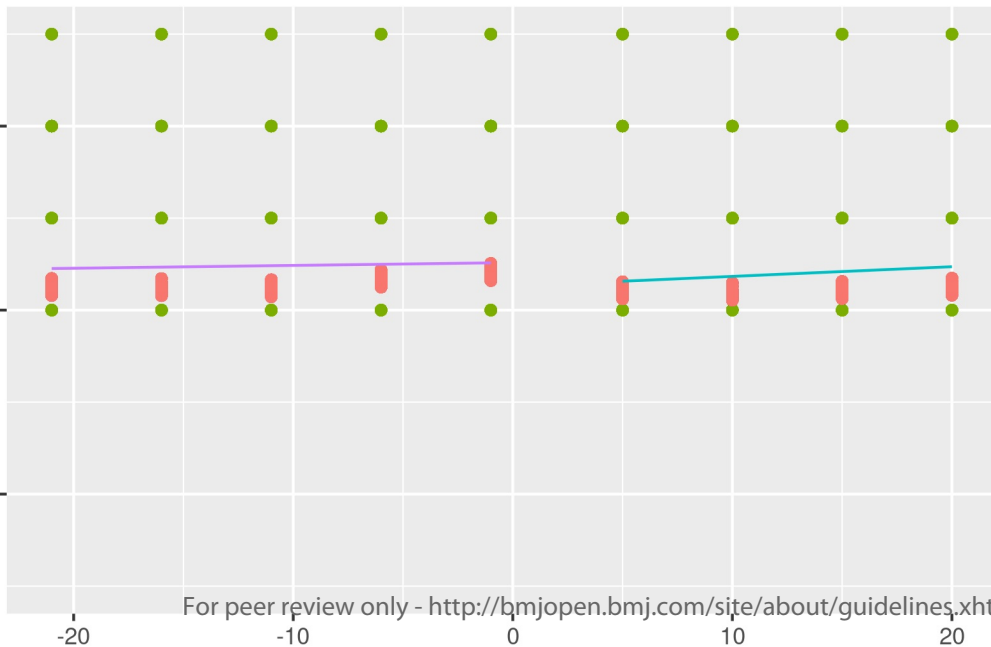

1  
2  
3  
4  
5  
6  
7  
8  
9  
10  
11  
12  
13  
14  
15  
16  
17  
18  
19  
20

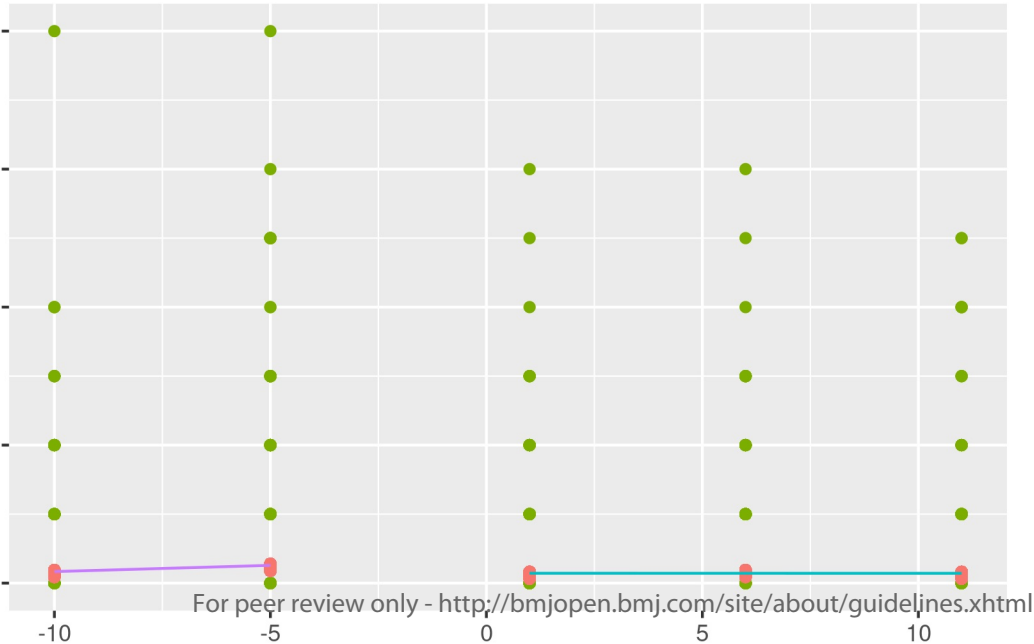

1  
2  
3  
4  
5  
6  
7  
8  
9  
10  
11  
12  
13  
14  
15  
16  
17  
18  
19  
20

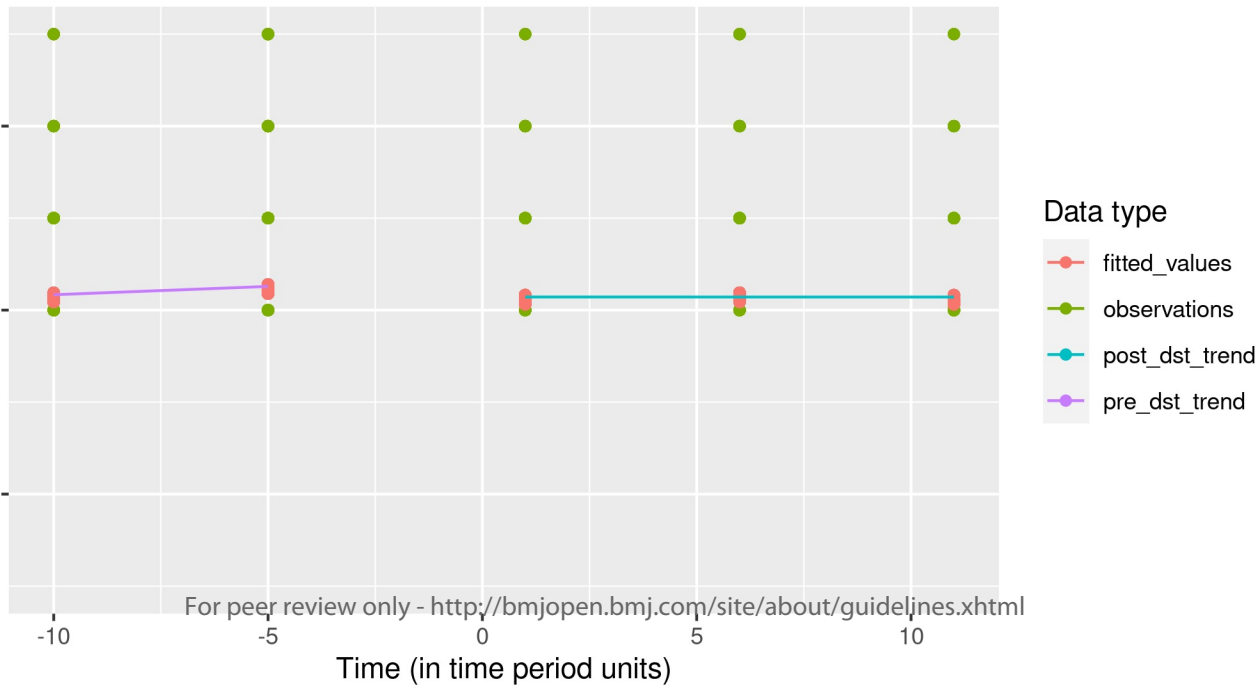

# Autumn total casualties, eastings, band 5000 - 6000, time period 4

BMJ Open

1  
2  
3  
4  
5  
6  
7  
8  
9  
10  
11  
12  
13  
14  
15  
16  
17  
18  
19  
20

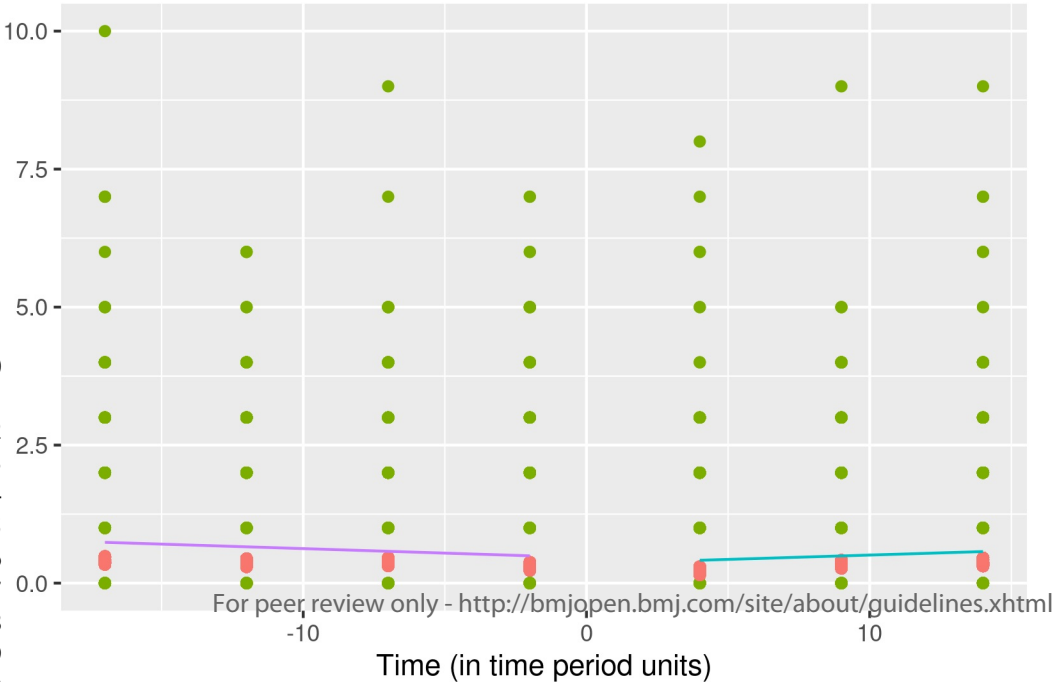

1  
2  
3  
4  
5  
6  
7  
8  
9  
10  
11  
12  
13  
14  
15  
16  
17  
18  
19  
20

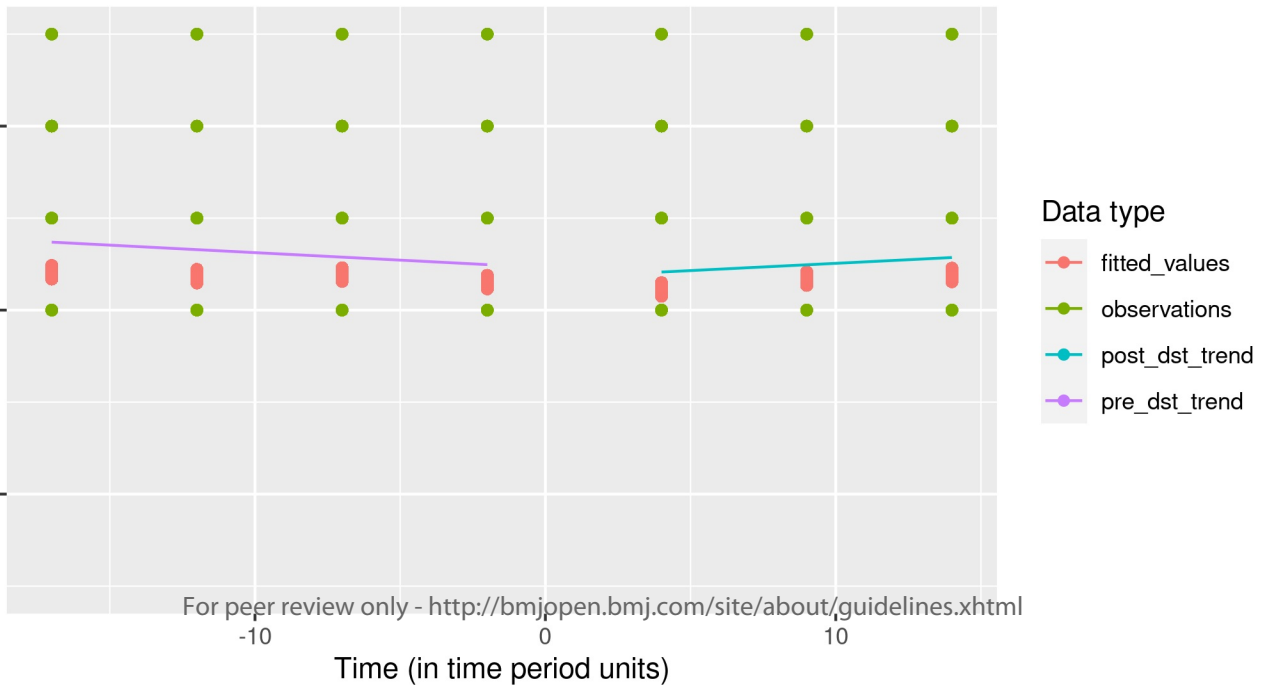

1  
2  
3  
4  
5  
6  
7  
8  
9  
10  
11  
12  
13  
14  
15  
16  
17  
18  
19  
20

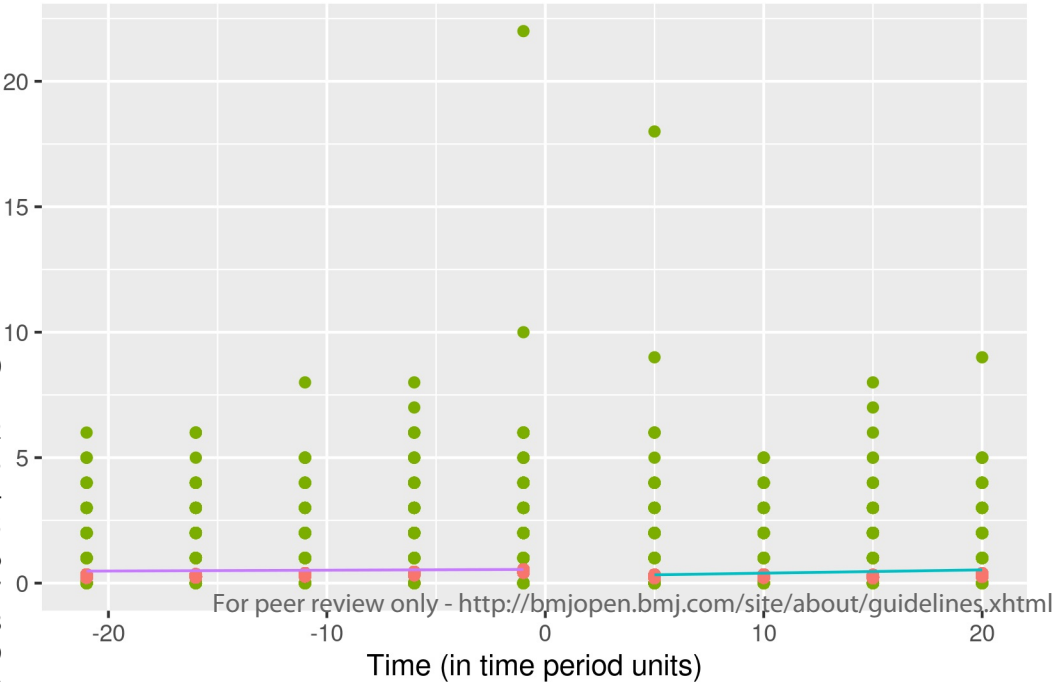



1  
2  
3  
4  
5  
6  
7  
8  
9  
10  
11  
12  
13  
14  
15  
16  
17  
18  
19  
20

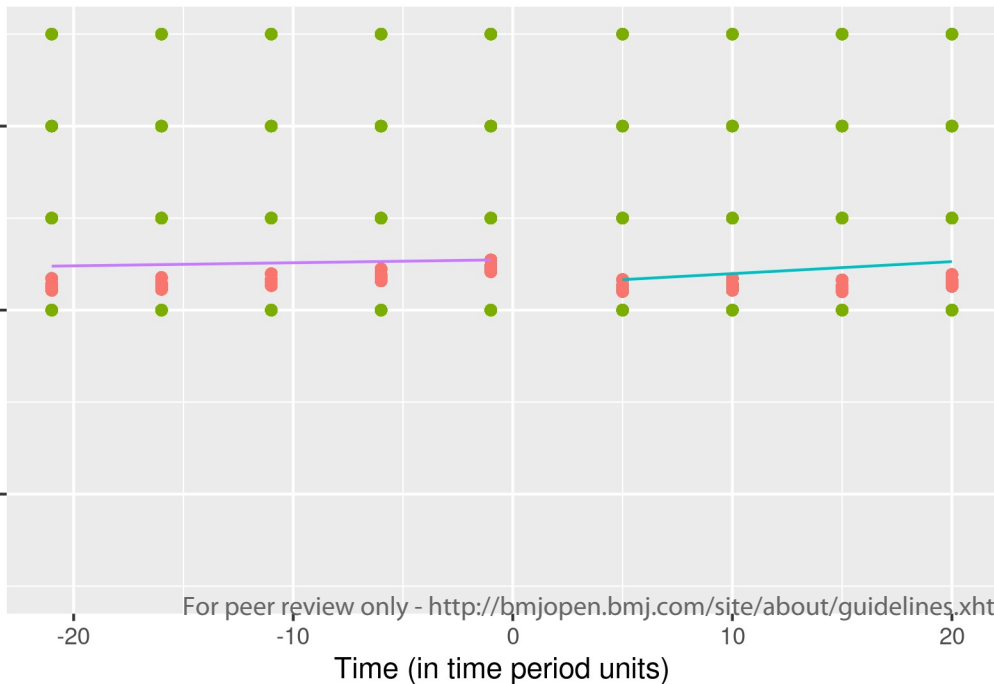

# Autumn total casualties, eastings, band 6000 - 7000, time period 5

BMJ Open

1  
2  
3  
4  
5  
6  
7  
8  
9  
10  
11  
12  
13  
14  
15  
16  
17  
18  
19  
20

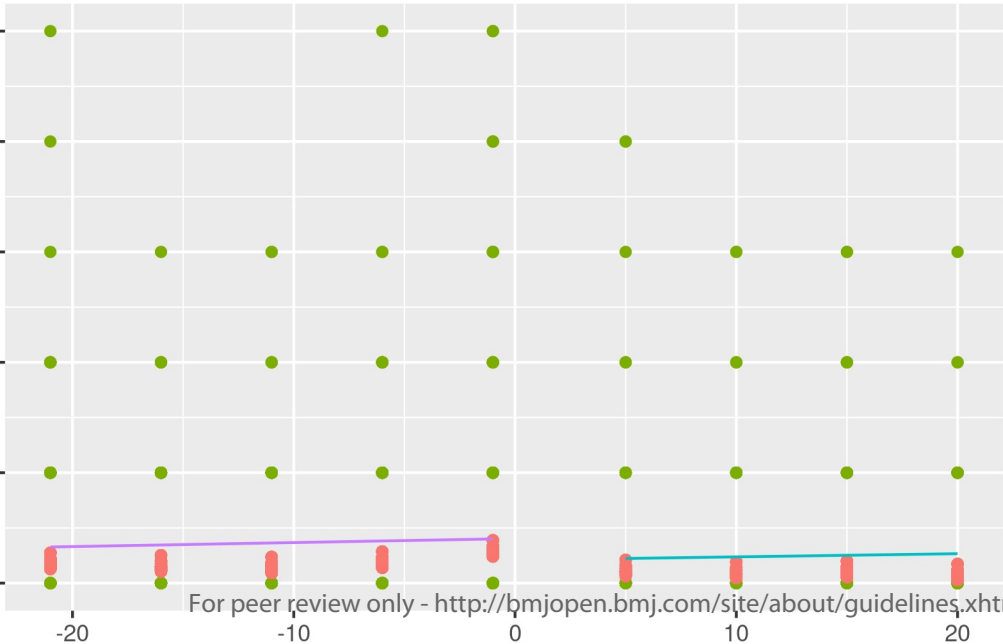

For peer review only - <http://bmjopen.bmj.com/site/about/guidelines.xhtml>

1  
2  
3  
4  
5  
6  
7  
8  
9  
10  
11  
12  
13  
14  
15  
16  
17  
18  
19  
20

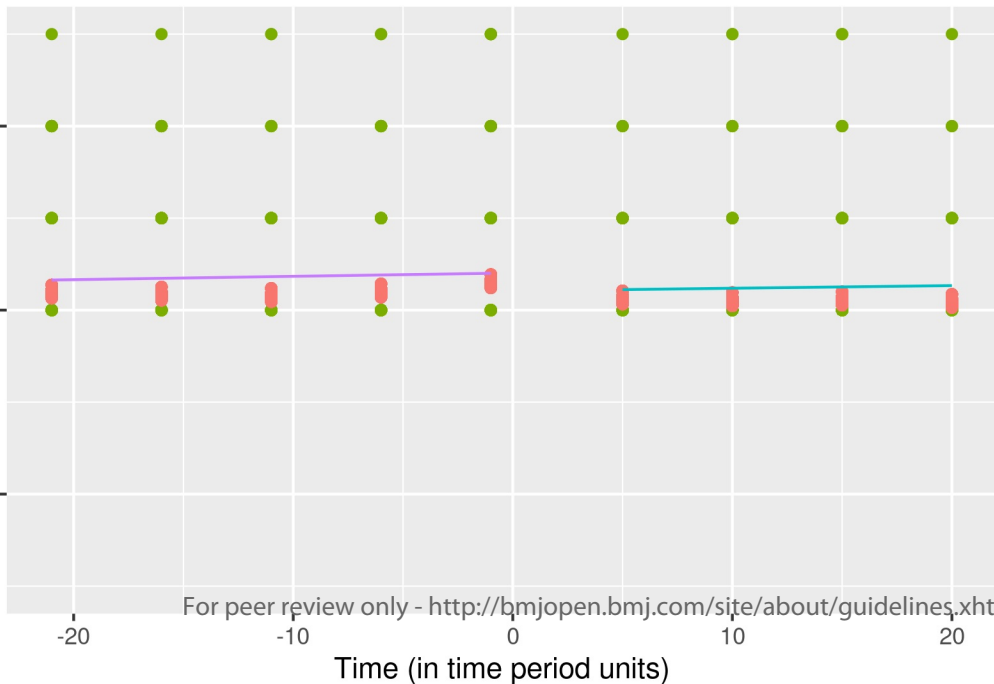

1  
2  
3  
4  
5  
6  
7  
8  
9  
10  
11  
12  
13  
14  
15  
16  
17  
18  
19  
20

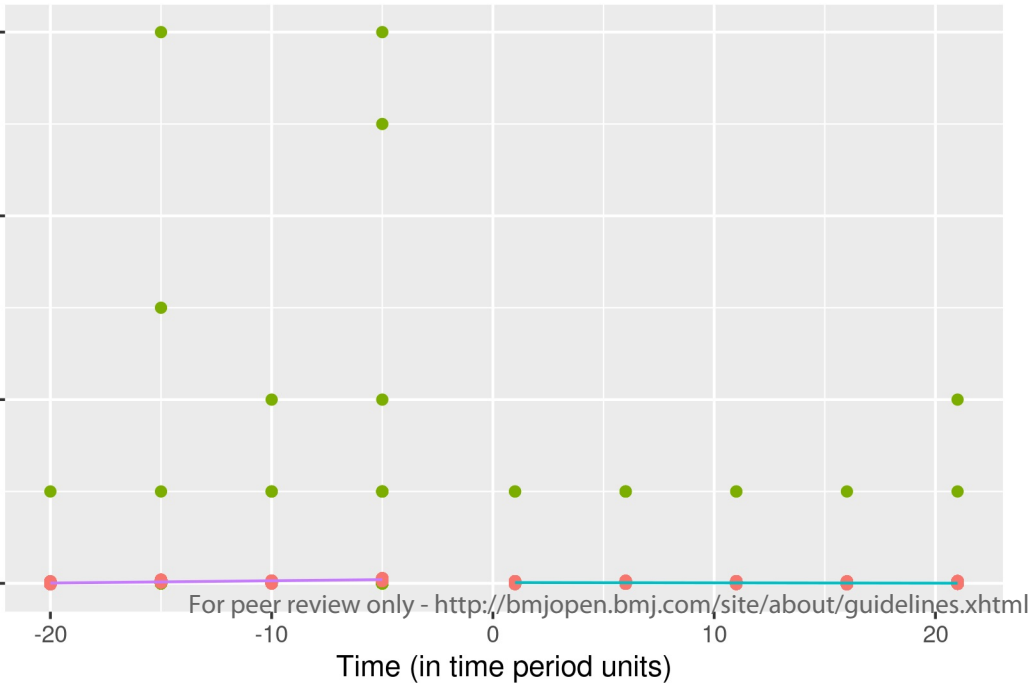

For peer review only - <http://bmjopen.bmj.com/site/about/guidelines.xhtml>

1  
2  
3  
4  
5  
6  
7  
8  
9  
10  
11  
12  
13  
14  
15  
16  
17  
18  
19  
20

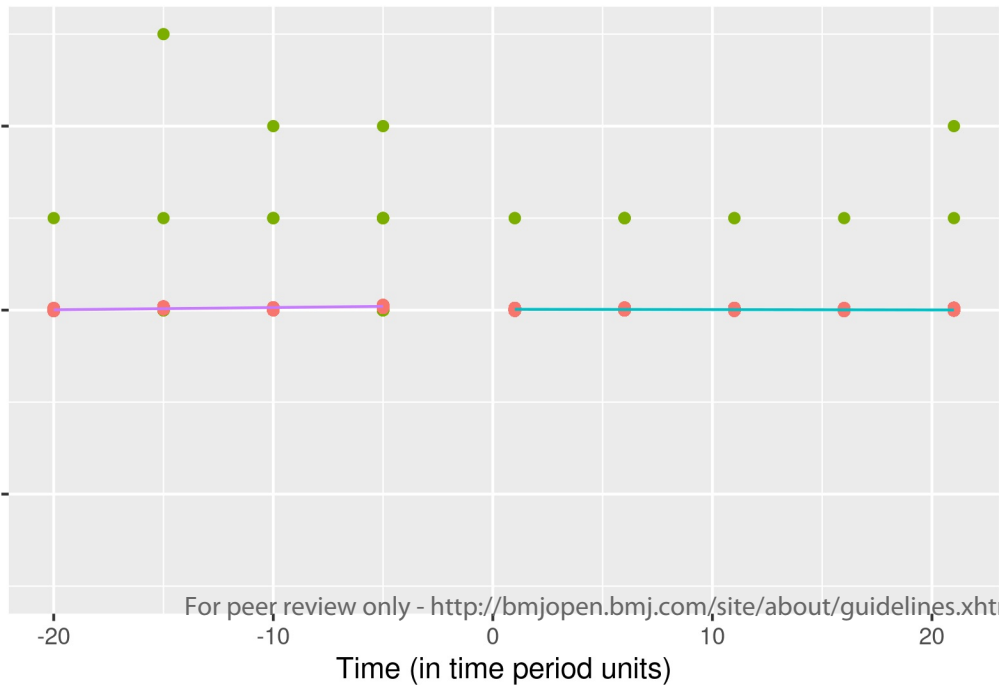

1  
2  
3  
4  
5  
6  
7  
8  
9  
10  
11  
12  
13  
14  
15  
16  
17  
18  
19  
20

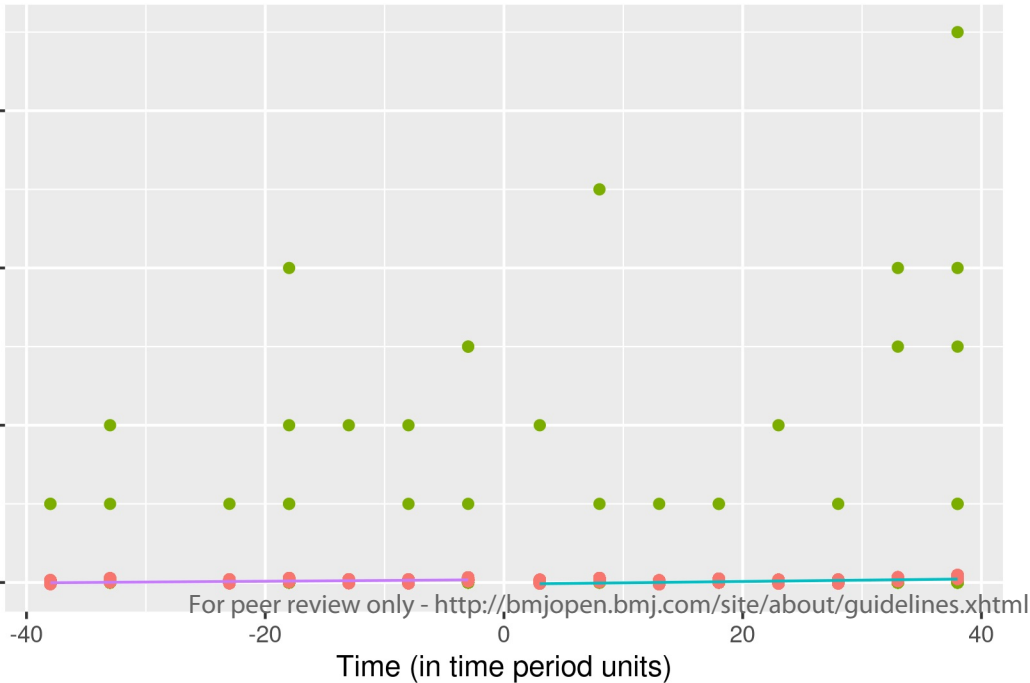

BMJ Open

1  
2  
3  
4  
5  
6  
7  
8  
9  
10  
11  
12  
13  
14  
15  
16  
17  
18  
19  
20

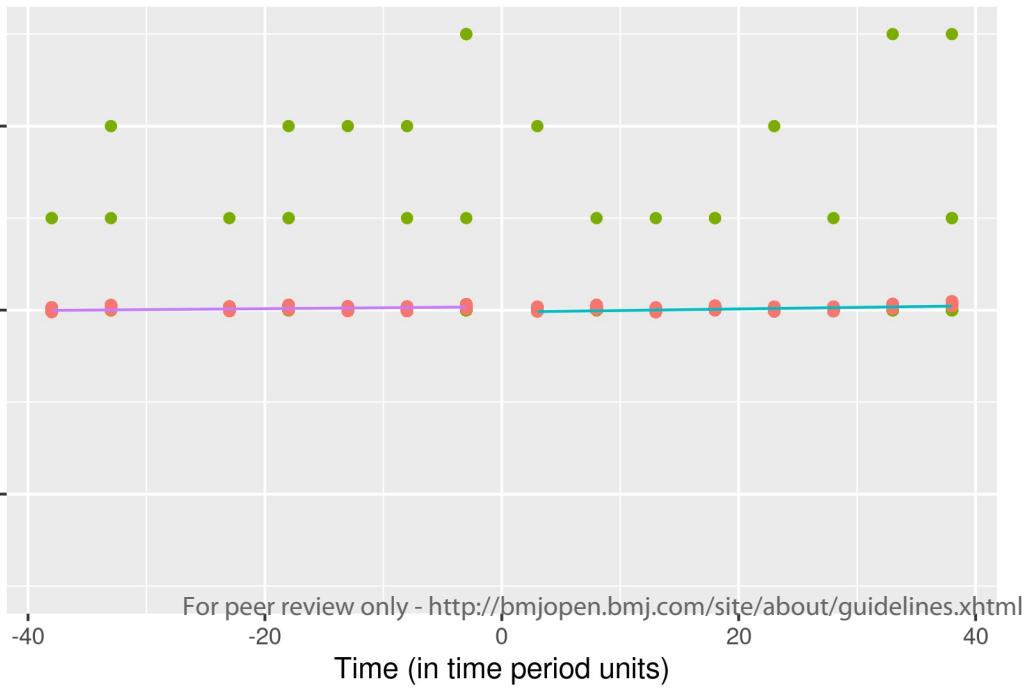

Data type

- fitted\_values
- observations
- post\_dst\_trend
- pre\_dst\_trend

1  
2  
3  
4  
5  
6  
7  
8  
9  
10  
11  
12  
13  
14  
15  
16  
17  
18  
19  
20

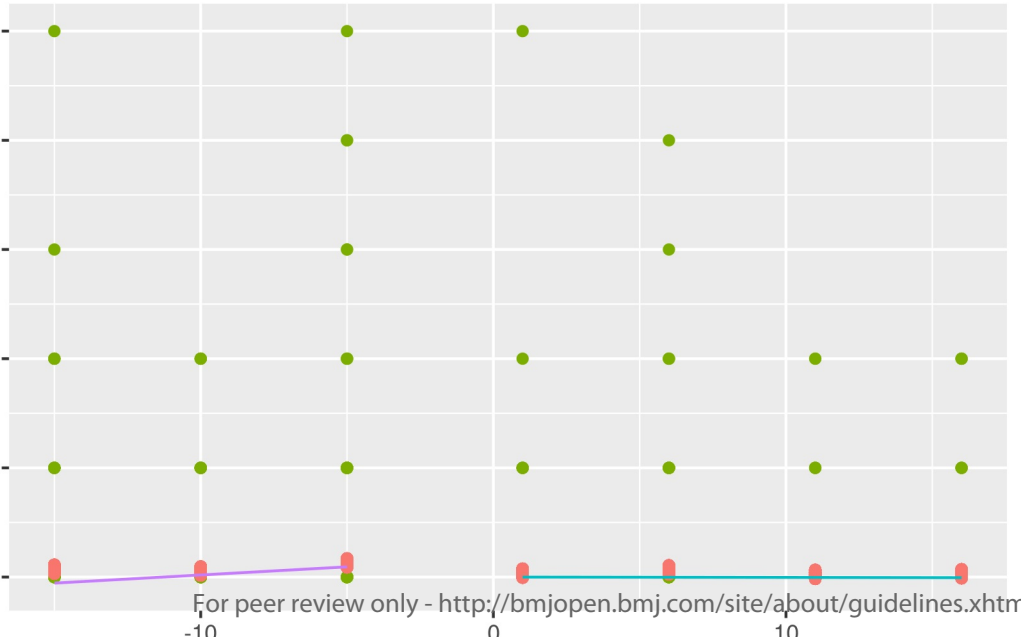

Data type

- fitted\_values
- observations
- post\_dst\_trend
- pre\_dst\_trend



1  
2  
3  
4  
5  
6  
7  
8  
9  
10  
11  
12  
13  
14  
15  
16  
17  
18  
19  
20

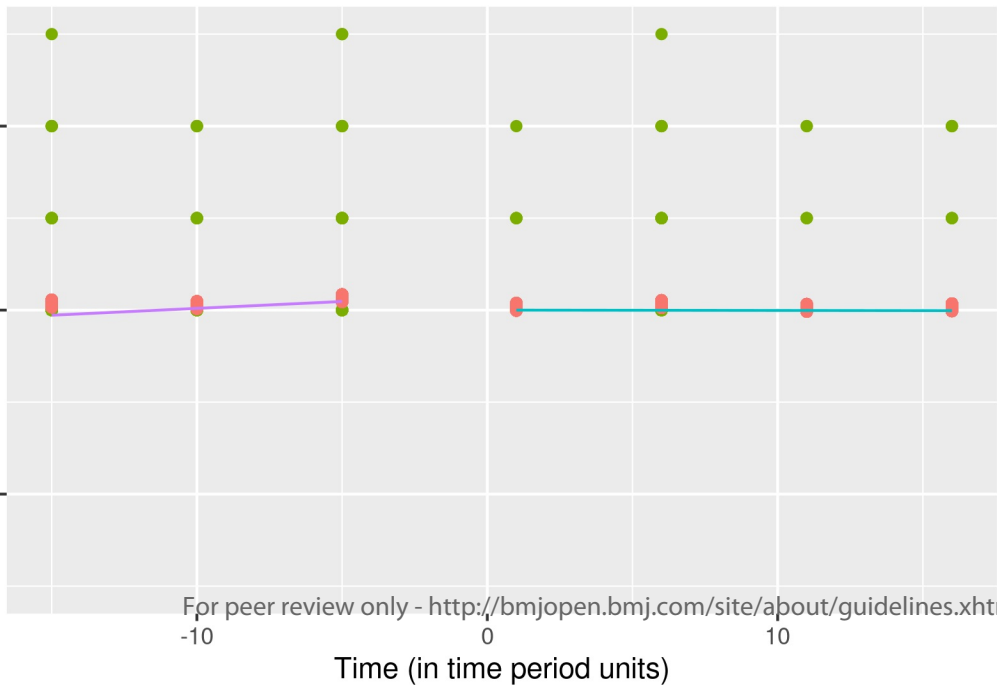

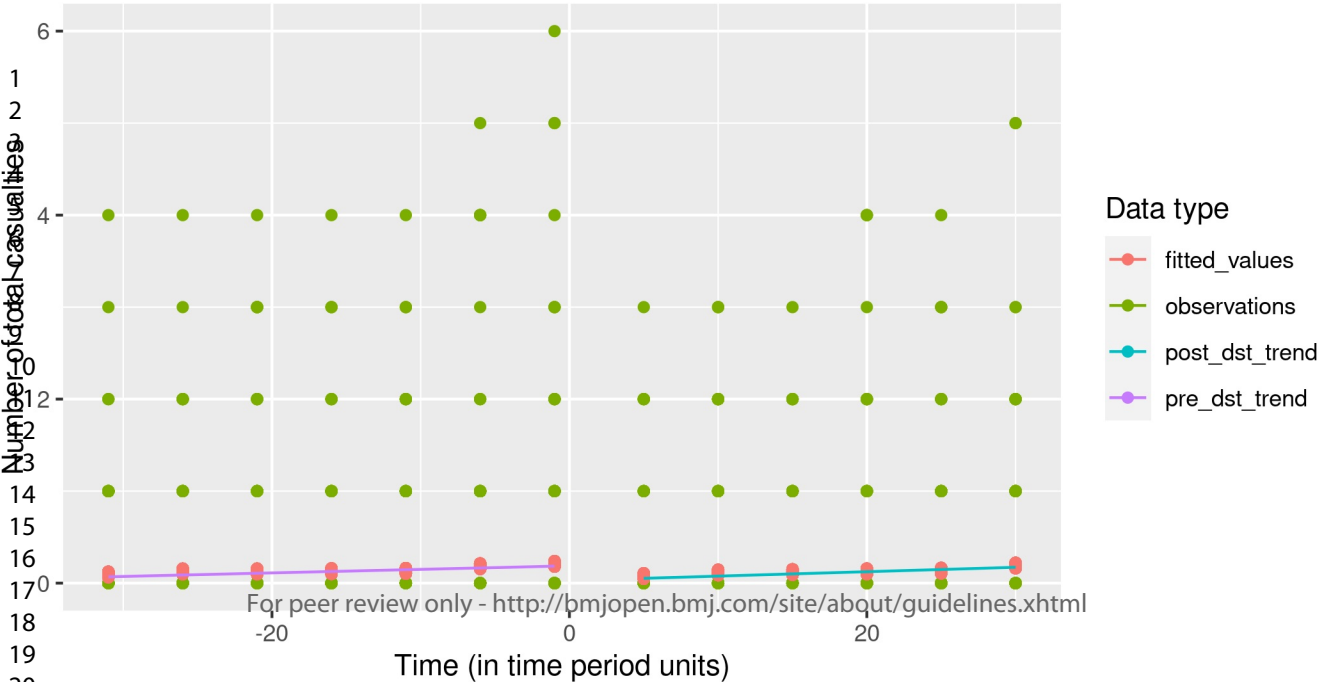

1  
2  
3  
4  
5  
6  
7  
8  
9  
10  
11  
12  
13  
14  
15  
16  
17  
18  
19  
20

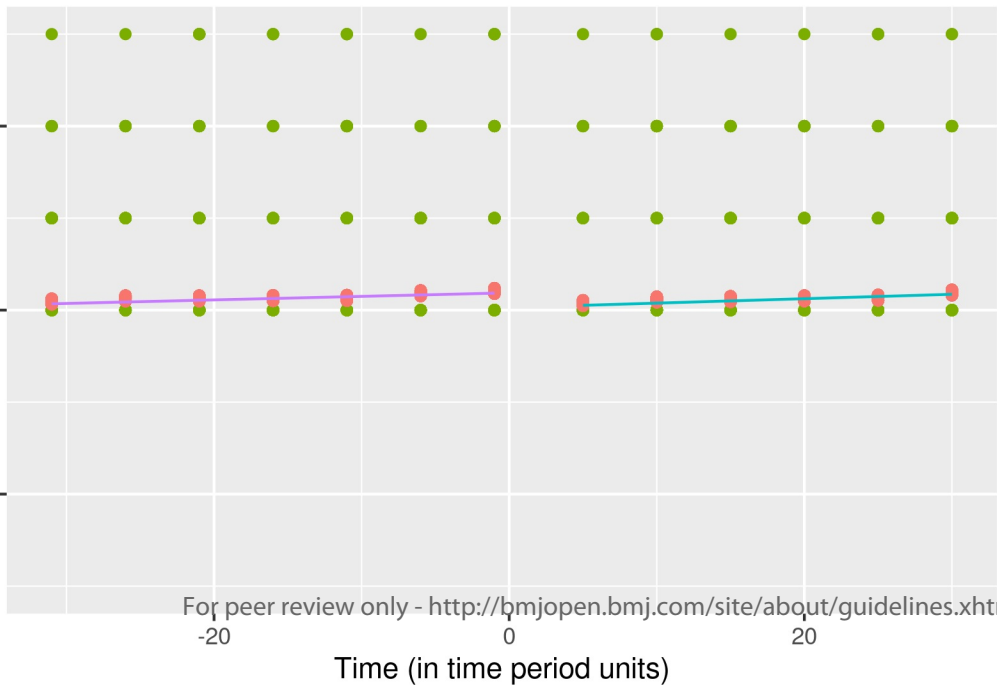

Data type

- fitted\_values
- observations
- post\_dst\_trend
- pre\_dst\_trend

# Autumn total casualties, northings, band 1000 - 2000, time period 1

BMJ Open

1  
2  
3  
4  
5  
6  
7  
8  
9  
10  
11  
12  
13  
14  
15  
16  
17  
18  
19  
20

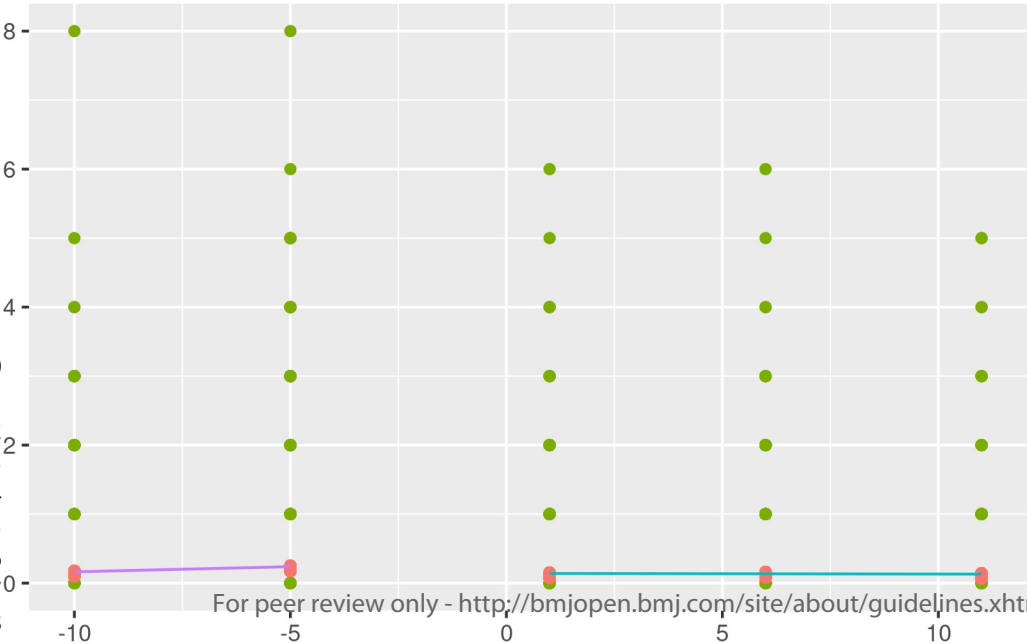

For peer review only - <http://bmjopen.bmj.com/site/about/guidelines.xhtml>

1  
2  
3  
4  
5  
6  
7  
8  
9  
10  
11  
12  
13  
14  
15  
16  
17  
18  
19  
20

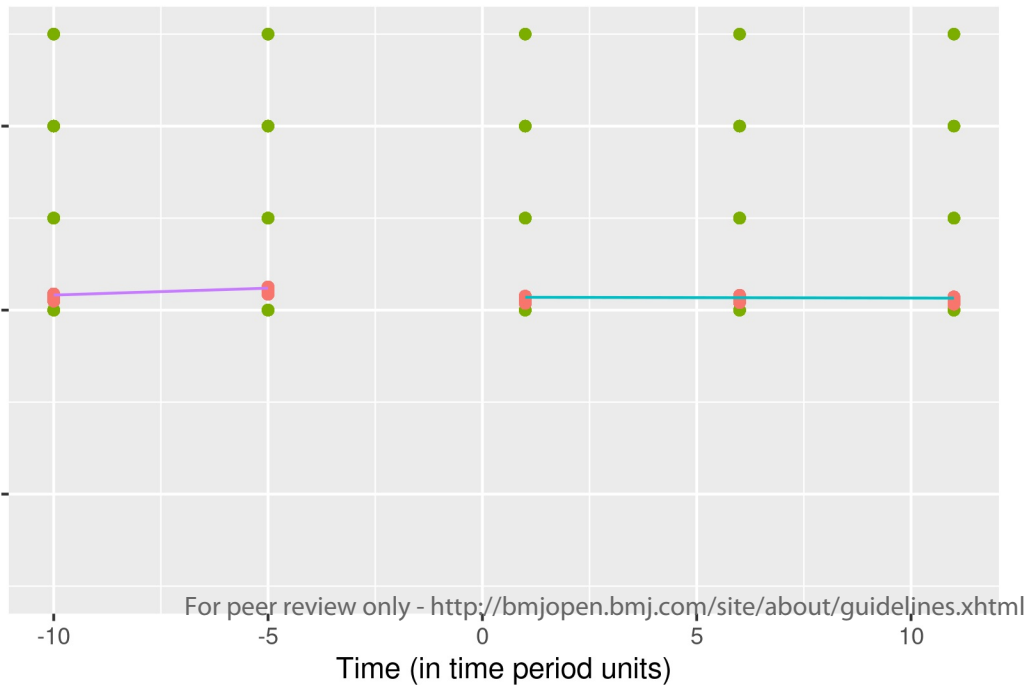

# Autumn total casualties, northings, band 1000 - 2000, time period 4

BMJ Open

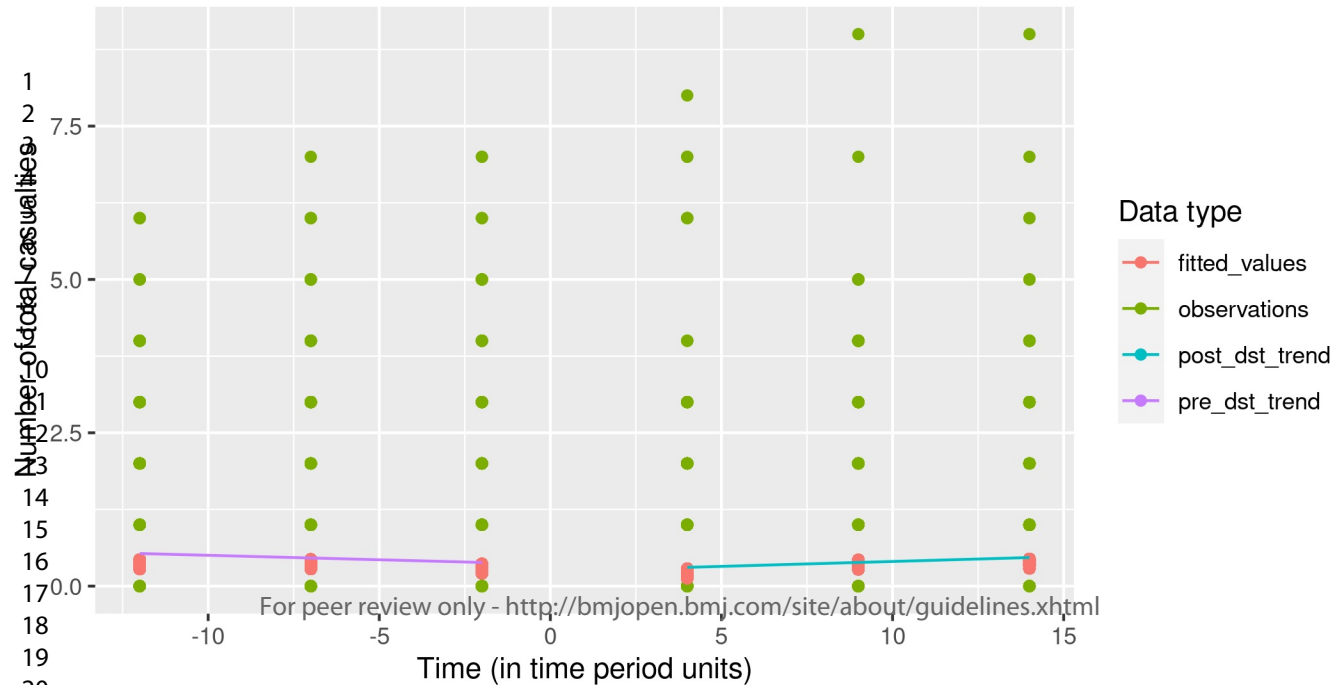

1  
2  
3  
4  
5  
6  
7  
8  
9  
10  
11  
12  
13  
14  
15  
16  
17  
18  
19  
20

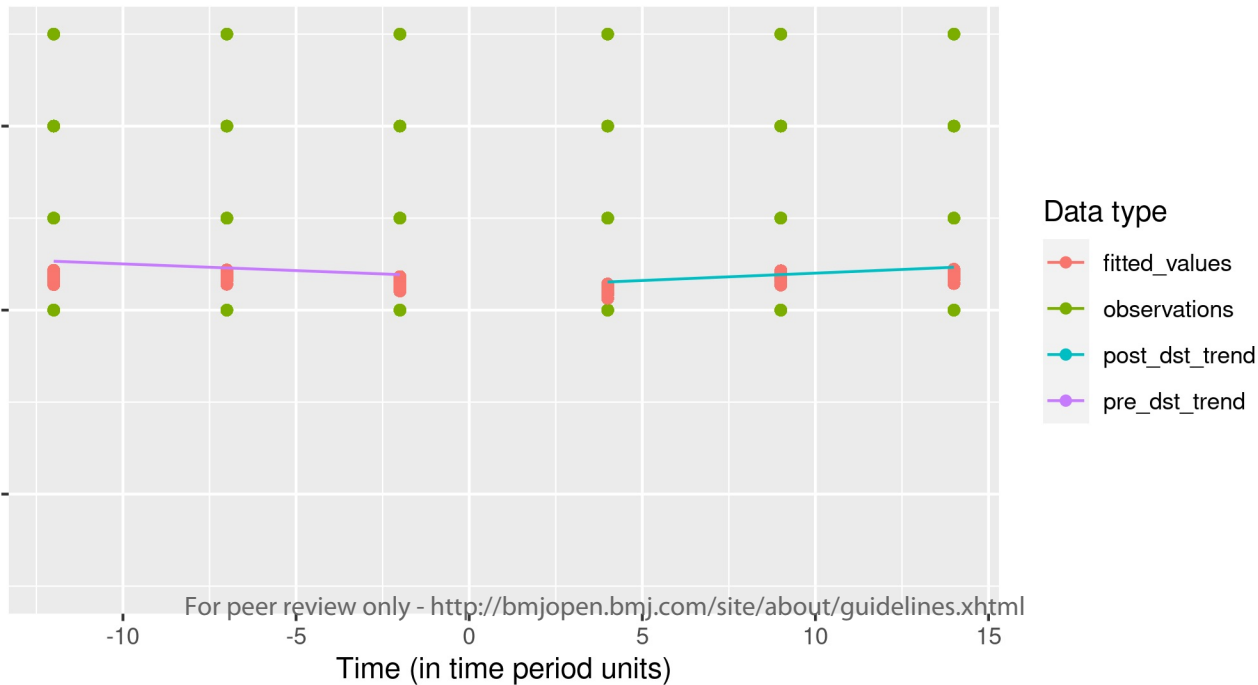

# Autumn total casualties, northings, band 2000 - 3000, time period 1

1  
2  
3  
4  
5  
6  
7  
8  
9  
10  
11  
12  
13  
14  
15  
16  
17  
18  
19  
20

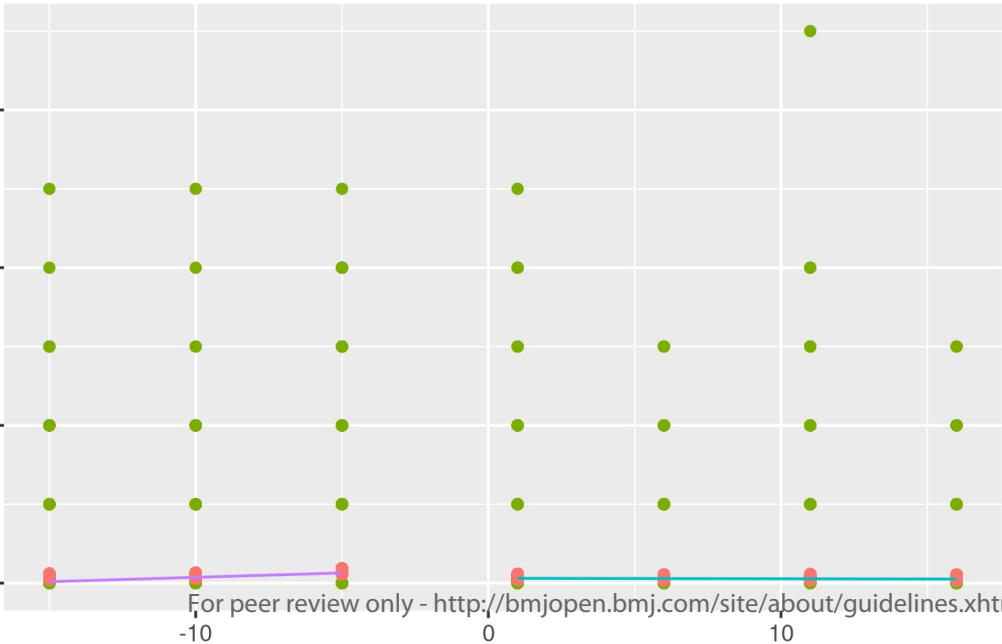

For peer review only - <http://bmjopen.bmj.com/site/about/guidelines.xhtml>

Time (in time period units)



1  
2  
3  
4  
5  
6  
7  
8  
9  
10  
11  
12  
13  
14  
15  
16  
17  
18  
19  
20

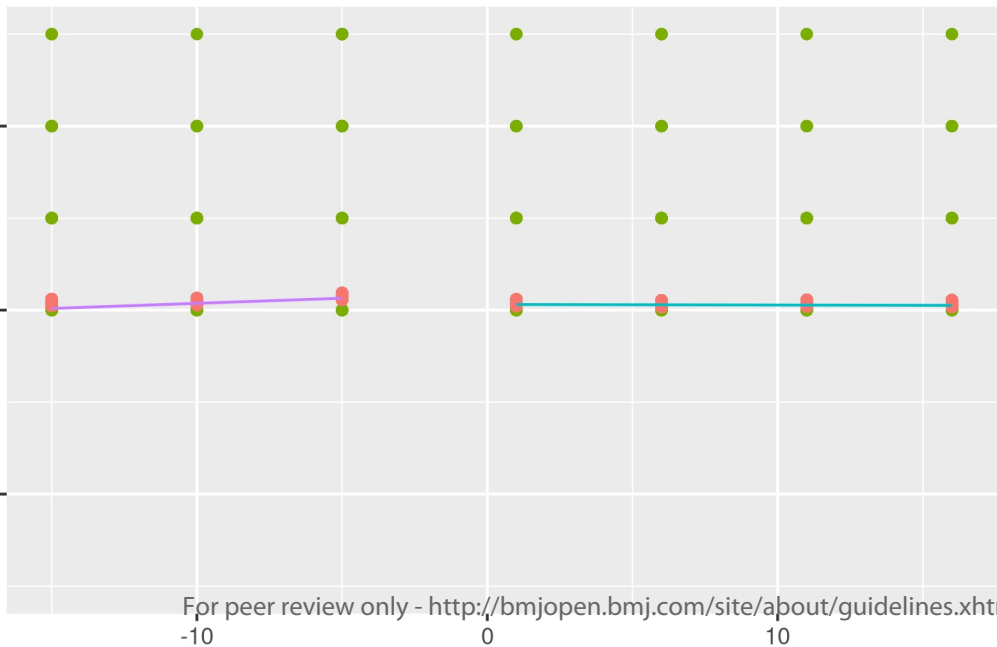

Data type

- fitted\_values
- observations
- post\_dst\_trend
- pre\_dst\_trend

# Autumn total casualties, northings, band 2000 - 3000, time period 5

BMJ Open

1  
2  
3  
4  
5  
6  
7  
8  
9  
10  
11  
12  
13  
14  
15  
16  
17  
18  
19  
20

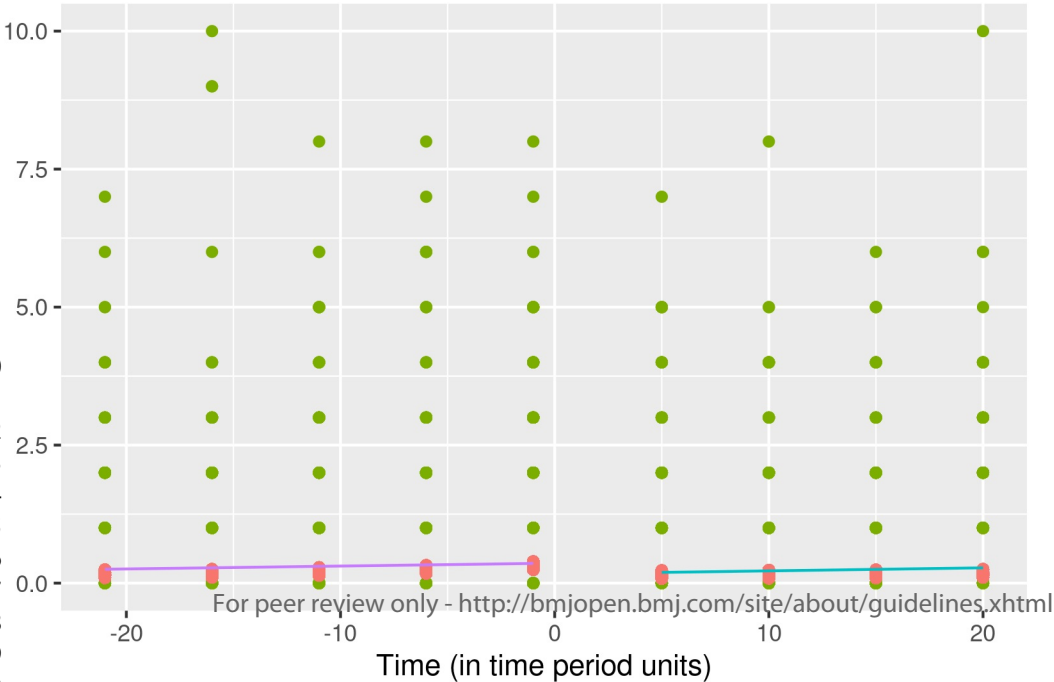

1  
2  
3  
4  
5  
6  
7  
8  
9  
10  
11  
12  
13  
14  
15  
16  
17  
18  
19  
20

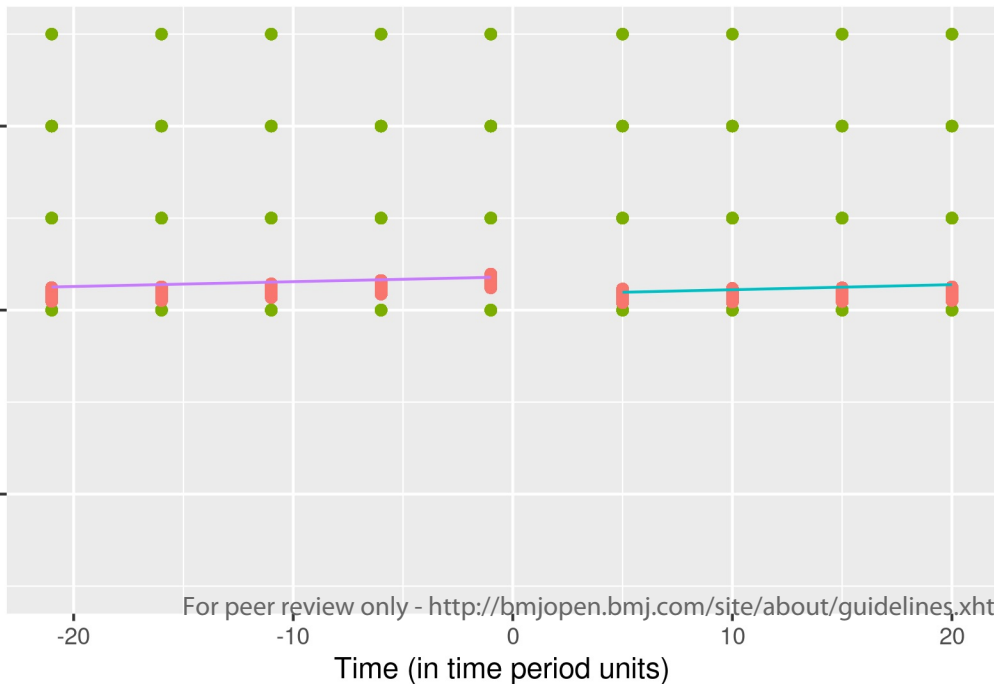

Data type

- fitted\_values
- observations
- post\_dst\_trend
- pre\_dst\_trend

# Autumn total casualties, northings, band 3000 - 4000, time period 1

BMJ Open

1  
2  
10  
5  
1  
2  
3  
4  
5  
6  
7  
8  
9  
10  
11  
12  
13  
14  
15  
16  
17  
18  
19  
20

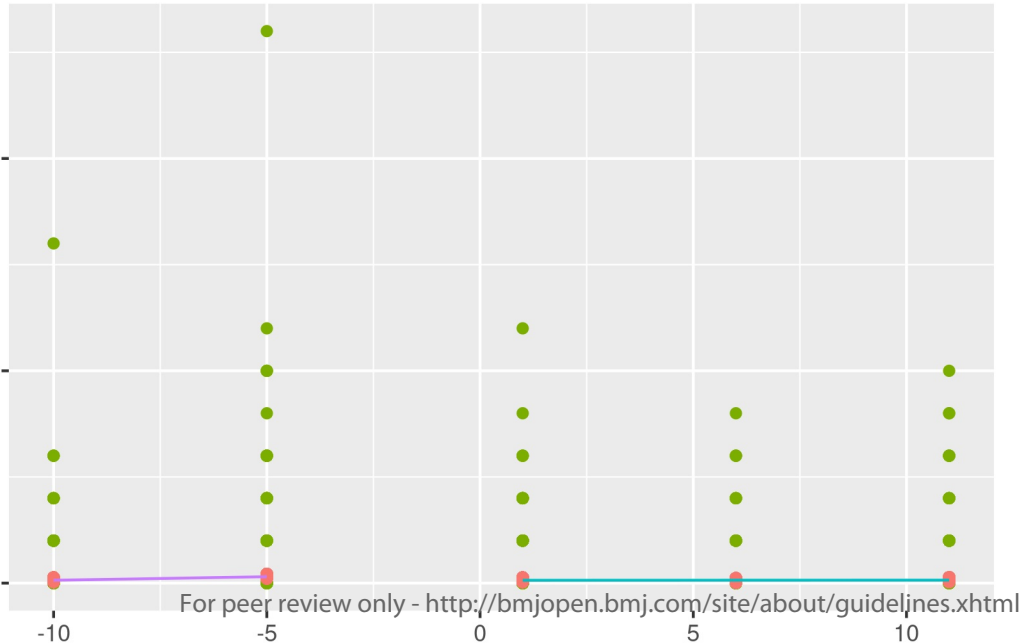

1  
2  
3  
4  
5  
6  
7  
8  
9  
10  
11  
12  
13  
14  
15  
16  
17  
18  
19  
20

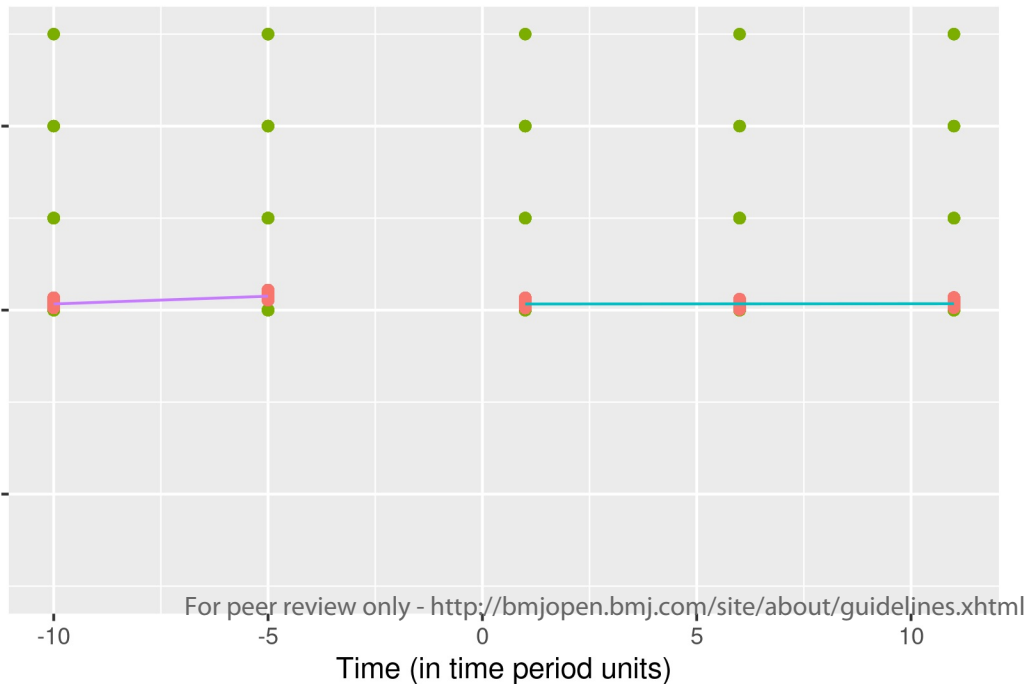

# Autumn total casualties, northings, band 3000 - 4000, time period 4

BMJ Open

1  
2  
3  
4  
5  
6  
7  
8  
9  
10  
11  
12  
13  
14  
15  
16  
17  
18  
19  
20

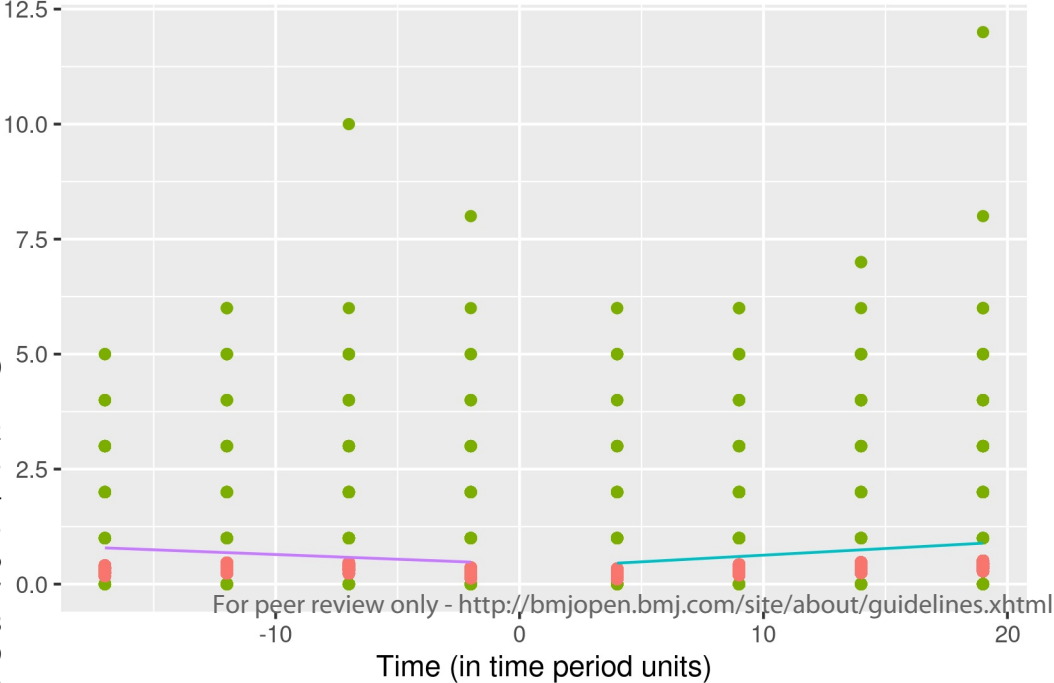

1  
2  
3  
4  
5  
6  
7  
8  
9  
10  
11  
12  
13  
14  
15  
16  
17  
18  
19  
20

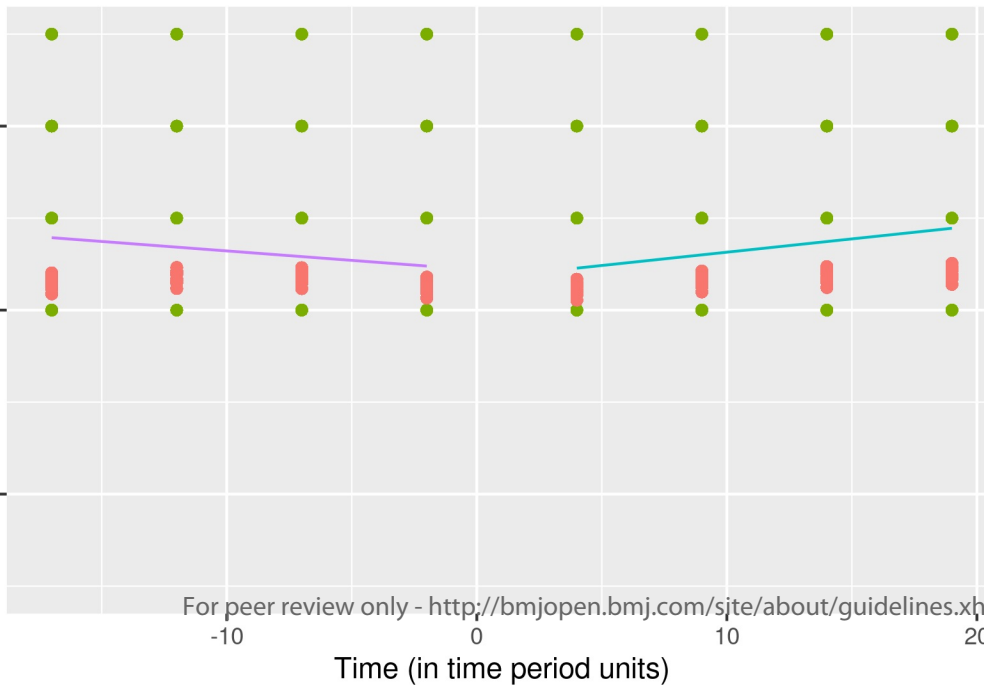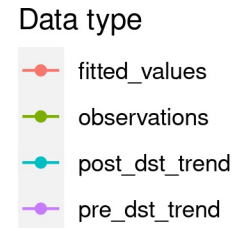

# Autumn total casualties, northings, band 5000 - 6000, time period 2

BMJ Open

1  
2  
3  
4  
5  
6  
7  
8  
9  
10  
11  
12  
13  
14  
15  
16  
17  
18  
19  
20

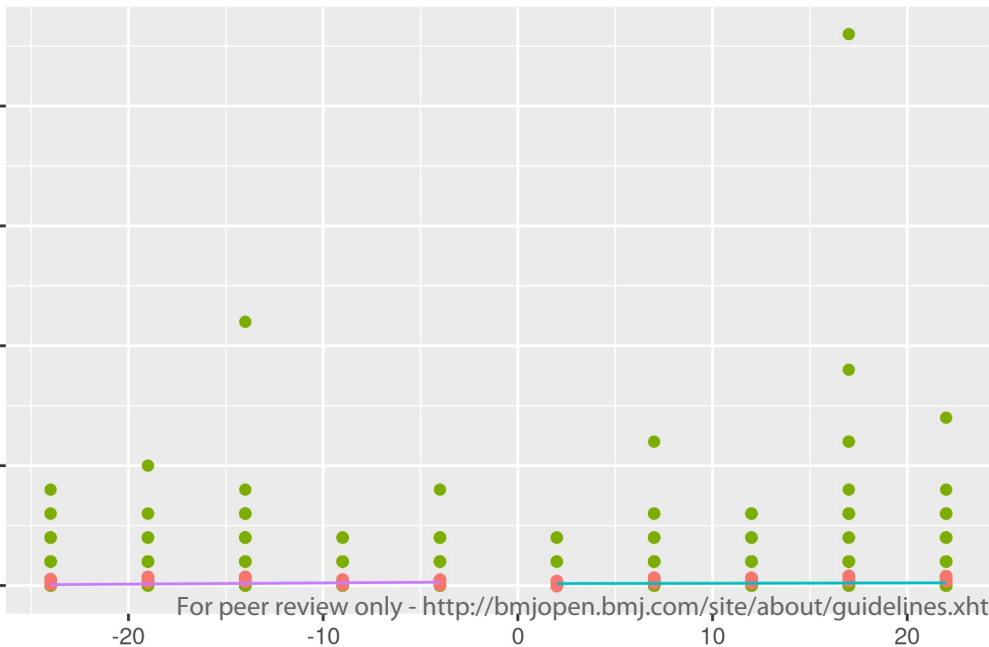

For peer review only - <http://bmjopen.bmj.com/site/about/guidelines.xhtml>



1  
2  
3  
4  
5  
6  
7  
8  
9  
10  
11  
12  
13  
14  
15  
16  
17  
18  
19  
20

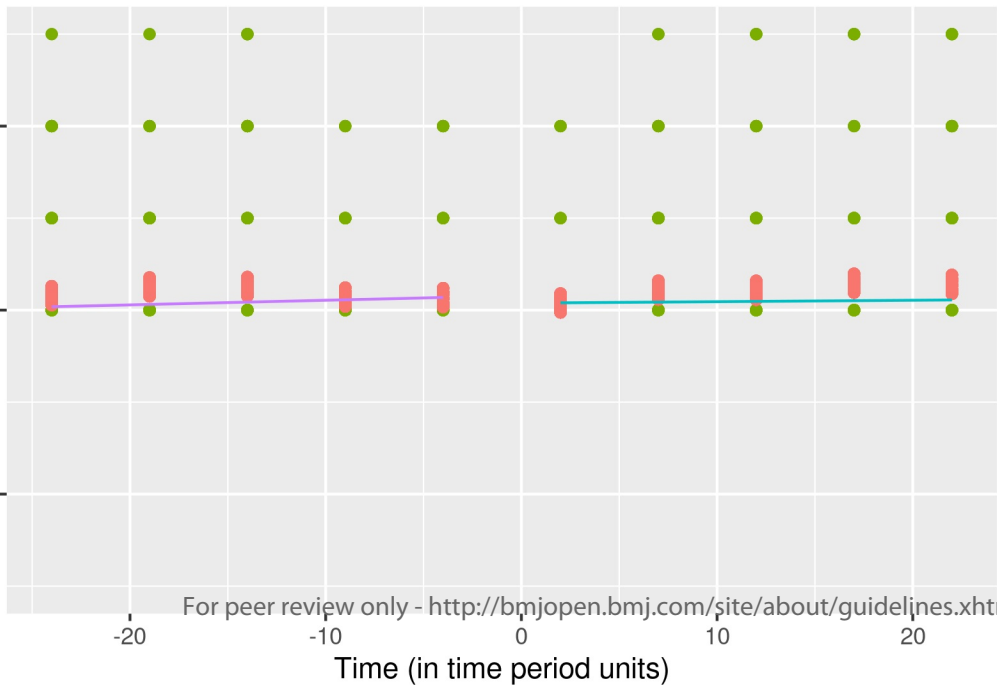

Data type

- fitted\_values
- observations
- post\_dst\_trend
- pre\_dst\_trend

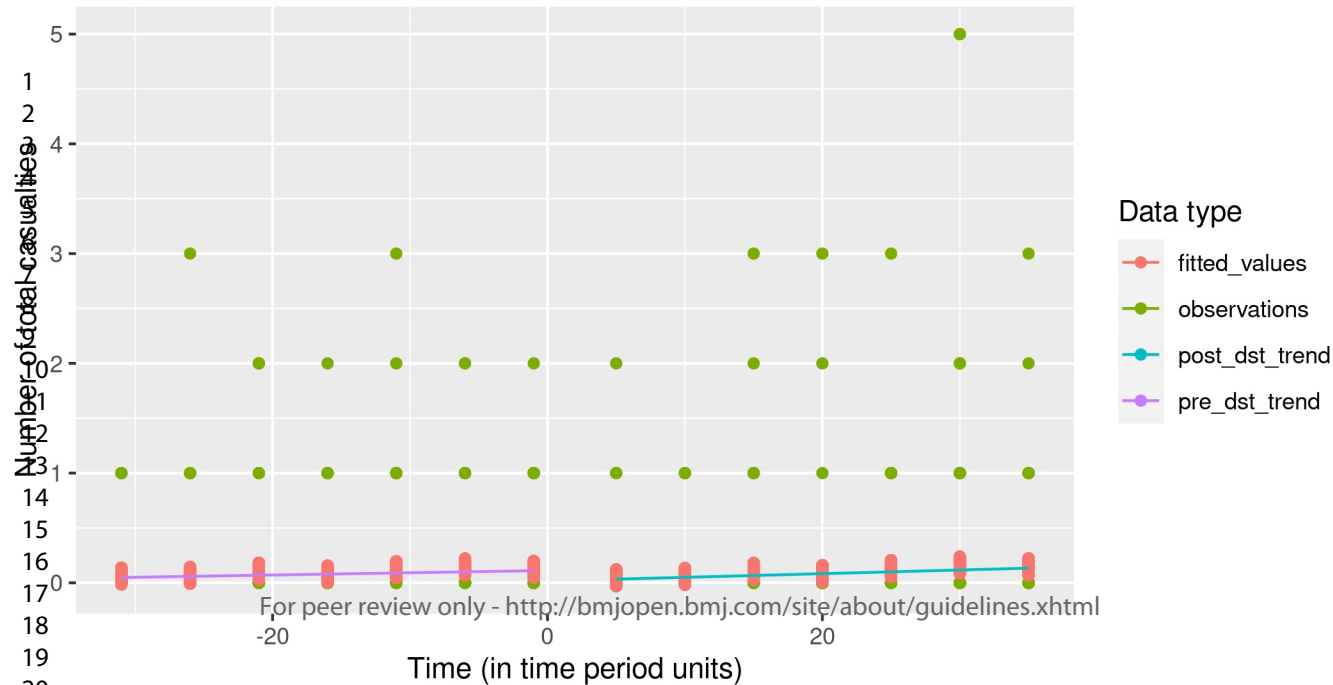

For peer review only - <http://bmjopen.bmj.com/site/about/guidelines.xhtml>

1  
2  
3  
4  
5  
6  
7  
8  
9  
10  
11  
12  
13  
14  
15  
16  
17  
18  
19  
20

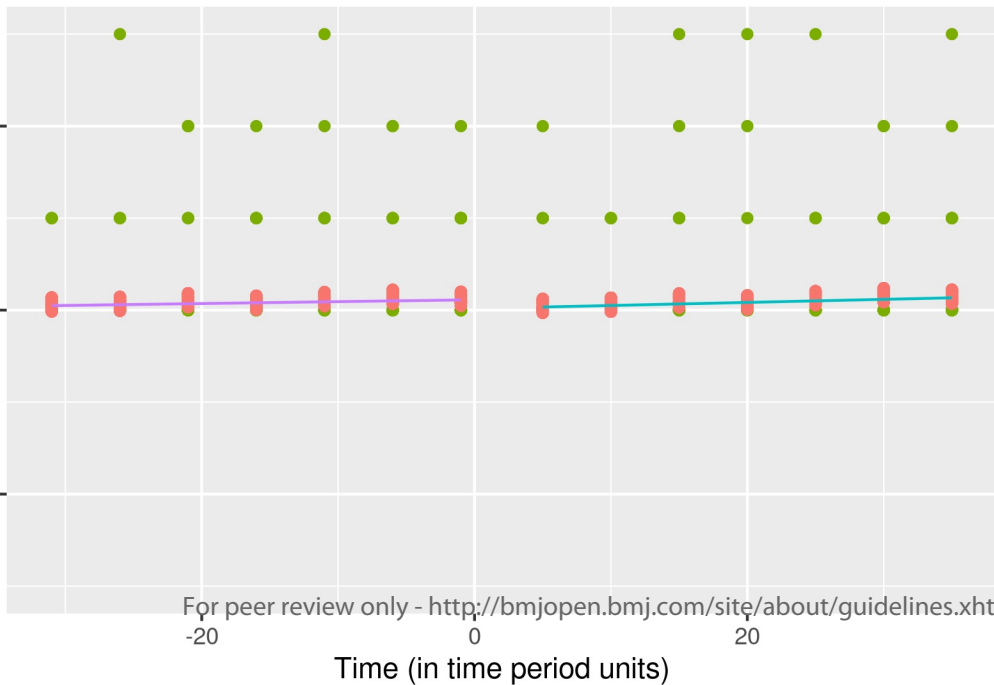

BMJ Open

1  
2  
3  
4  
5  
6  
7  
8  
9  
10  
11  
12  
13  
14  
15  
16  
17  
18  
19  
20

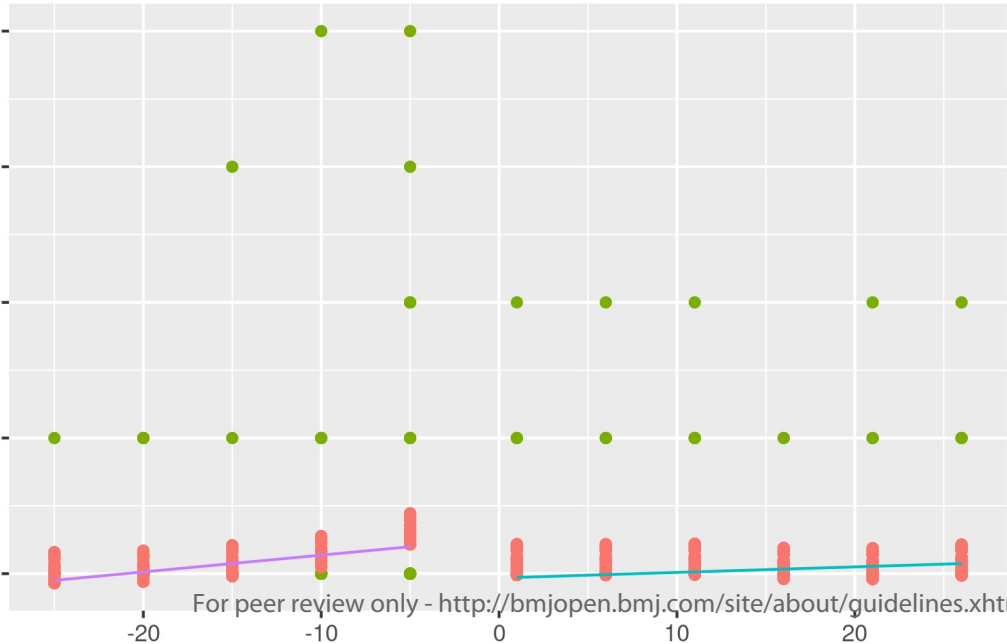

For peer review only - <http://bmjopen.bmj.com/site/about/guidelines.xhtml>

1  
2  
3  
4  
5  
6  
7  
8  
9  
10  
11  
12  
13  
14  
15  
16  
17  
18  
19  
20

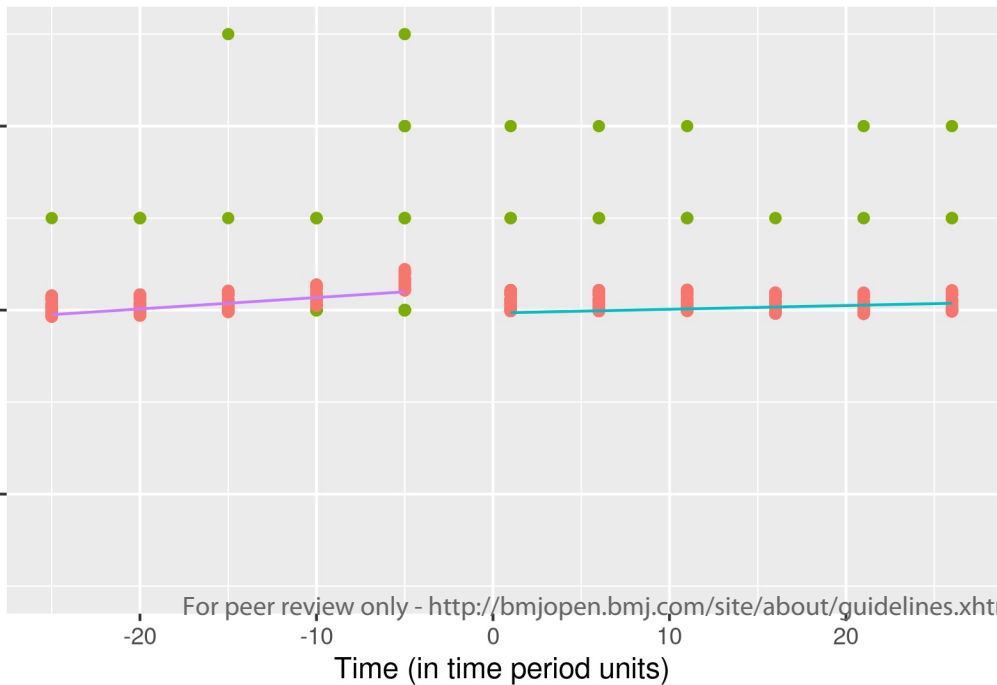

Data type

- fitted\_values
- observations
- post\_dst\_trend
- pre\_dst\_trend

Number of total casualties

For peer review only - <http://bmjopen.bmj.com/site/about/guidelines.xhtml>

Time (in time period units)

### Data type

- fitted\_values
- observations
- post\_dst\_trend
- pre\_dst\_trend

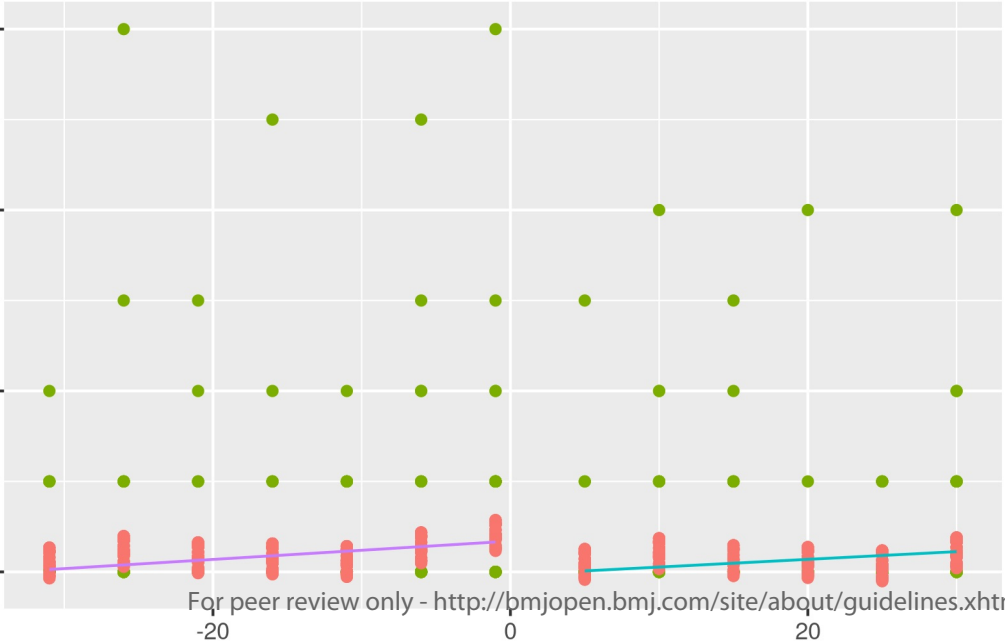

1

2

3

4

5

6

7

8

9

10

11

12

13

14

15

16

17

18

19

20

1  
2  
3  
4  
5  
6  
7  
8  
9  
10  
11  
12  
13  
14  
15  
16  
17  
18  
19  
20

Number of total casualties

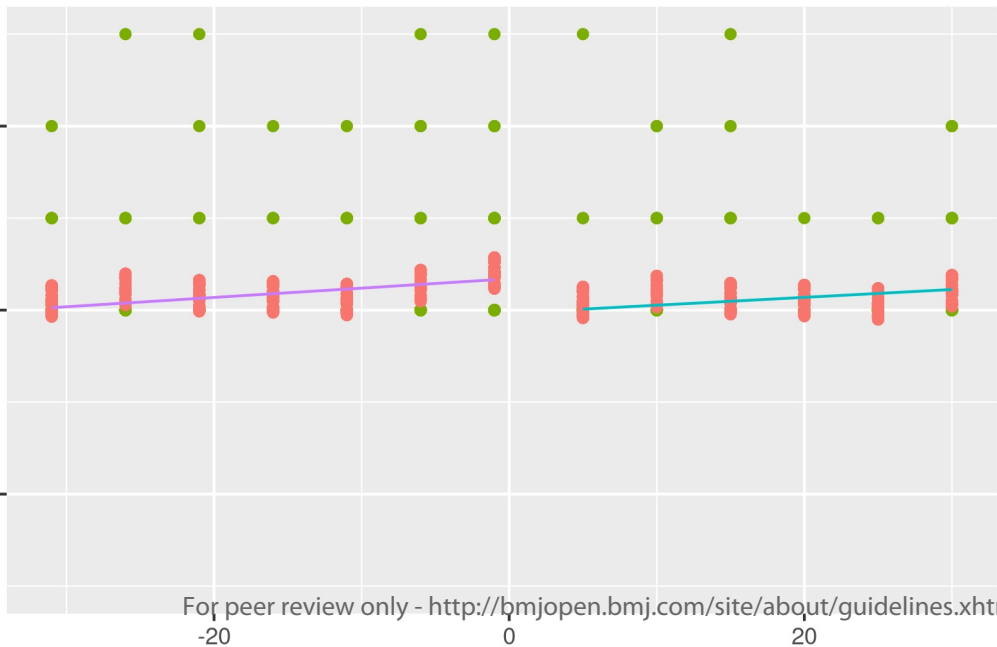

Data type

- fitted\_values
- observations
- post\_dst\_trend
- pre\_dst\_trend

1  
2  
3  
4  
5  
6  
7  
8  
9  
10  
11  
12  
13  
14  
15  
16  
17  
18  
19  
20

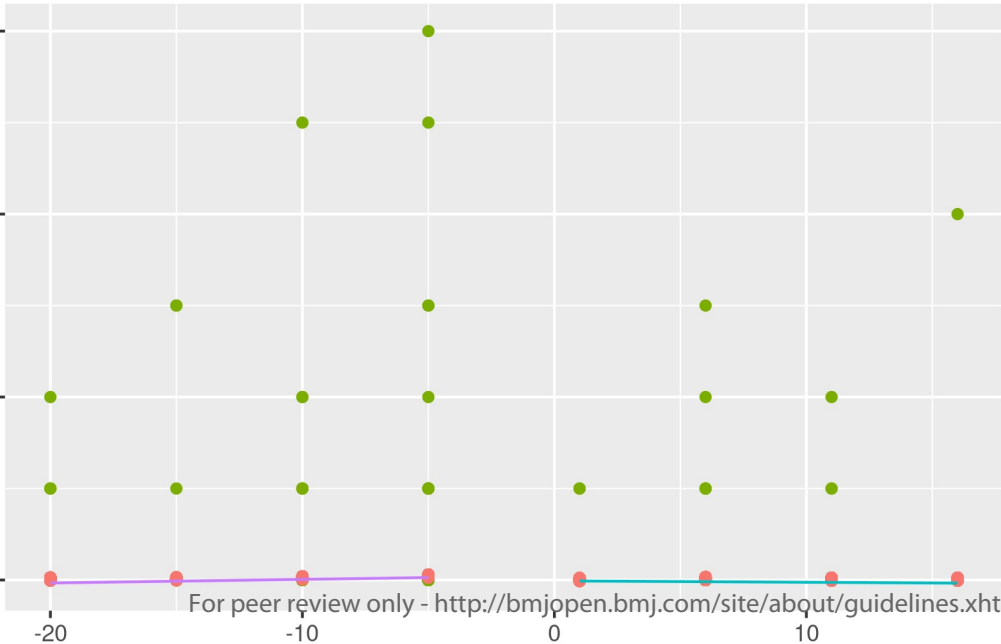

For peer review only - <http://bmjopen.bmj.com/site/about/guidelines.xhtml>



1  
2  
3  
4  
5  
6  
7  
8  
9  
10  
11  
12  
13  
14  
15  
16  
17  
18  
19  
20

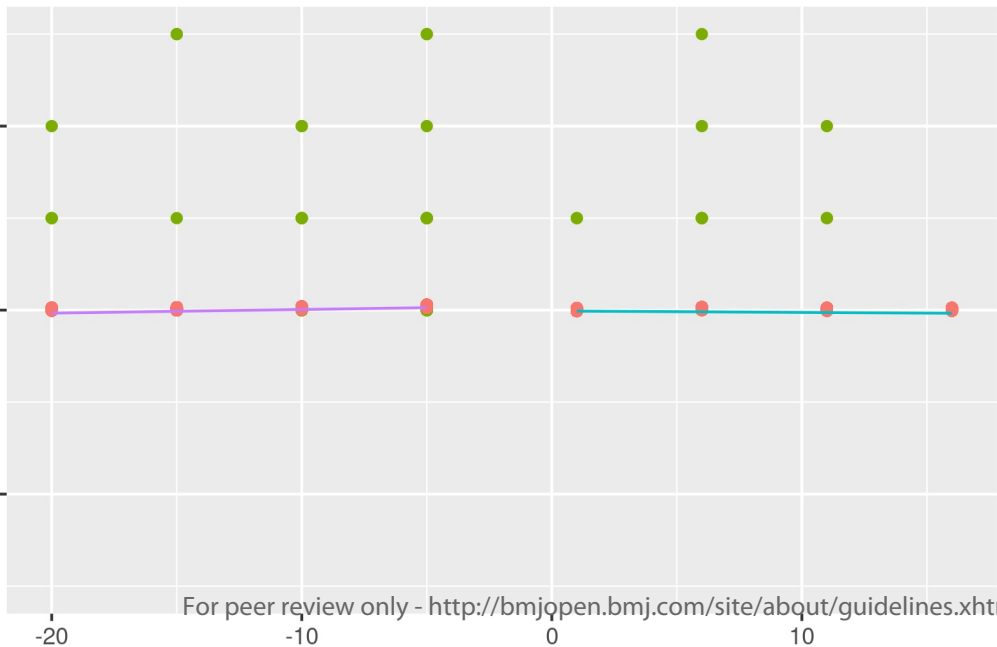

```
1
2
3 #Script for RDD in time modelling for time period DST models, with specification checks on:
4 #Autocorrelation of error term up to lag 10, Newey-West errors applied if present
5 #Heteroskedasticity, HC3 errors applied if present
6 #Specification checks of polynomial order of forcing variable (i.e. time); BIC is used to judge performance though
7 other indicators also output
8 #Specification checks by varying bandwidth for linear models
9
10 #attach packages
11 library(data.table)
12 library(DescTools)
13 library(rdrobust)
14 library(sandwich)
15 library(lmtest)
16
17 #set working directory
18 setwd("~/Documents/DST")
19
20 #Define sequences of data sets
21 #The STATS19 data have been segmented into separate files representing 7 easting and 13 northing bands and 1
22 aggregate data set (21 files in total)
23 #Datasets are named with same text prefix "data_", different numerical suffix "i"
24 #We define the sequence of datasets as seq_i, which refers to the 21 segmented datasets described above
25 #We define seq_t as the sequence of time periods ranging from 1 to 5
26 #The functions will iterate through all sequences and output results tables with all models' results
27 seq_i<-c(1:21)
28 seq_t<-c(1:5)
29
30 #Define functions:
31 #inputparams function calculates optimal bandwidth from rdrobust package; outputs from this are used in subsequent
32 polynomial and bandwidth trials
33 #rdd_calcs_poly function performs RDD with optimal bandwidth, and trials different polynomials for time
34 #rdd_calcs_bw function trials RDD with different bandwidths for linear in time form
35
36 inputparams<-function(i,t){
37
38 #compute bandwidth
39 data_model<-data
40
41
42
43
44
45
46
```

```

1
2
3 cols<-c("dow", "year")
4 data_model<-data_model[, (cols):=lapply(.SD, as.factor), .SDcols=cols]
5 tryCatch(
6   expr = bw<-rdbwselect(y=data_model$tot_casualties, x=data_model$time_variable_tp,
7     covs=cbind(data_model$year,data_model$dow)),
8   error = function(e) NULL
9 )
10 if(exists("bw")==TRUE){
11   bw_exists=1
12   bwl=ceiling(bw$bws[[1]])
13   bwr=ceiling(bw$bws[[2]])
14   #tabulate
15   resultsline<-data.table(i,t,bwl,bwr,nrow(data_model),bw_exists)
16   names(resultsline)<-c("model_no","tp","bw_mainl","bw_mainr","n","bw_exists")
17 } else if (exists("bw")==FALSE){
18   resultsline<-data.table(i,t,0,0,0,0)
19   names(resultsline)<-c("model_no","tp","bw_mainl","bw_mainr","n","bw_exists")
20 }
21 return(resultsline)
22 }
23
24 rdd_calcs_poly<-function(i,t){
25   #extract bandwidth info
26   paras_i<-mod_paras[model_no==i & tp==t]
27   bwl=paras_i$bw_mainl
28   bwr=paras_i$bw_mainr
29   bwexists=paras_i$bw_exists
30   if (bwexists==1){
31     #prepare data: need wt, kt and ktpost variables (cutoff is when time_variable_tp=0)
32     data_model<-data[time_variable_tp>=-bwl & time_variable_tp<=bwr]
33     data_model<-data_model[time_variable_tp>=0, wt:=1]
34     data_model<-data_model[time_variable_tp<0, wt:=0]
35     mintp=-1*min(data_model$time_variable_tp)
36     interventiontp=mintp+1
37     data_model<-data_model[time_variable_tp<0,kt:=(interventiontp)+time_variable_tp]
38     data_model<-data_model[time_variable_tp>=0,kt:=mintp+time_variable_tp]
39     data_model<-data_model[time_variable_tp<0, ktpost:=0]
40
41
42
43
44
45
46

```

```

1
2
3 data_model<-data_model[time_variable_tp>=0, ktpost:=kt-interventiontp+1]
4
5 cols<-c("dow", "year")
6 data_model<-data_model[, (cols):=lapply(.SD, as.factor), .SDcols=cols]
7
8 rdd_polytrial<-function(j){
9
10   tryCatch(
11     expr=lm_rdd<-lm(tot_casualties ~ wt + poly(kt, degree=j) + poly(ktpost, degree=j) + dow + year,
12 data=data_model),
13     error=function(e) NULL
14   )
15   if(exists("lm_rdd")==TRUE){
16     #Breusch Godfrey autocorrelation test up to lag 10
17     for (l in c(1:10)){
18       tryCatch(
19         expr = assign(paste0("bgtest_",l), value=BreuschGodfreyTest(lm_rdd, order = l, order.by = data_model$kt,
20 type = "Chisq", data = data_model)),
21         error = function(e) NULL
22       )
23       tryCatch(
24         expr = assign(paste0("lag_",l), value=eval(parse(text=paste0("bgtest_",l,"$p.value")))),
25         error = function(e) NULL
26       )
27       tryCatch(
28         expr = assign(paste0("b",l),value=eval(parse(text=paste0("data.table(as.numeric(lag_",l,""),",",l,""))))),
29         error = function(e) NULL
30       )
31     }
32   }
33   tryCatch(
34     expr = bgtab<-rbind(b1,b2,b3,b4,b5,b6,b7,b8,b9,b10),
35     error = function(e) NULL
36   )
37   if (exists("bgtab")==FALSE){
38     lag_val=0
39   } else if (exists("bgtab")==TRUE){
40     bgtab_select<-bgtab[V1<=0.1]
41
42
43
44
45
46

```

```

1
2
3     if (nrow(bgtab_select)>=1){
4         lag_val=max(bgtab_select$V2)
5     } else if (lag_1>0.1){
6         lag_val=0
7     }
8 }
9 #Bruesch Pagan heteroskedasticity test
10 bp_pval=bptest(lm_rdd)$p.value
11 if (is.na(bp_pval)){
12     bp_pval=100
13 }
14 #adjust errors if needed to account for autocorrelation or heteroskedasticity
15 if (lag_val>0){
16     nw_vcov <- NeweyWest(lm_rdd, order.by = data_model$kt, data=data_model, lag = lag_val, prewhite = F,
17 adjust = T)
18     lmsum<-as.matrix(coeftest(lm_rdd, vcov = nw_vcov))
19     lm_sum<-lmsum[2,]
20 } else if (lag_val==0 & bp_pval<=0.1){
21     hc_vcov <- vcovHC(lm_rdd)
22     lmsum<-as.matrix(coeftest(lm_rdd, vcov = hc_vcov))
23     lm_sum<-lmsum[2,]
24 } else if (lag_val==0 & bp_pval>0.1){
25     lmsum<-as.matrix(summary(lm_rdd)$coefficients)
26     lm_sum<-lmsum[2,]
27 }
28
29 data_model_l<-data_model[time_variable_tp<0]
30 data_model_r<-data_model[time_variable_tp>=0]
31 totcas_l=sum(data_model_l$tot_casualties)
32 totcas_r=sum(data_model_r$tot_casualties)
33 n_year=length(unique(data_model$year))
34
35 resultsline<-
36 data.table(i,t,j,lm_sum[[1]],lm_sum[[2]],lm_sum[[4]],nrow(data_model),nrow(data_model_l),nrow(data_model_r),
37           as.numeric(bwl), as.numeric(bwr),as.numeric(lag_val),as.numeric(bp_pval),
38           summary(lm_rdd)$r.squared, summary(lm_rdd)$adj.r.squared, BIC(lm_rdd),
39 AIC(lm_rdd),totcas_l,totcas_r,n_year)
40
41
42
43
44
45
46

```

```

1
2
3     names(resultsline)<-c("model_no","tp","poly_deg","coef","se", "pval",
4 "n_tot","n_left","n_right","bw_l","bw_r","lag","bp_pval",
5     "rsq","adj_rsq","bic","aic","totcas_l","totcas_r","n_year")
6     return(resultsline)
7   }}
8   #run for polynomials order 1 to 4
9   results_table<-c()
10  for (j in 1:4){
11    calcs<-rdd_polytrial(j)
12    results_table<-rbind(calcs,results_table)
13  }
14  return(results_table)
15  }}
16
17 rdd_calcs_bw<-function(i,t){
18   #extract bandwidth info
19   paras_i<-mod_paras[model_no==i & tp==t]
20   bwl=paras_i$bw_mainl
21   bwr=paras_i$bw_mainr
22   bwexists=paras_i$bw_exists
23
24   if (bwexists==1){
25     rdd_bwtrial<-function(j){
26
27       #prepare data: need wt, kt and ktpost variables (cutoff is when time_variable_tp=0)
28       data_model<-data[time_variable_tp>=-(bwl+j) & time_variable_tp<=(bwr+j)]
29       data_model<-data_model[time_variable_tp>=0, wt:=1]
30       data_model<-data_model[time_variable_tp<0, wt:=0]
31       mintp=-1*min(data_model$time_variable_tp)
32       interventiontp=mintp+1
33       data_model<-data_model[time_variable_tp<0,kt:=(interventiontp)+time_variable_tp]
34       data_model<-data_model[time_variable_tp>=0,kt:=mintp+time_variable_tp]
35       data_model<-data_model[time_variable_tp<0, ktpost:=0]
36       data_model<-data_model[time_variable_tp>=0, ktpost:=kt-interventiontp+1]
37
38       cols<-c("dow", "year")
39       data_model<-data_model[, (cols):=lapply(.SD, as.factor), .SDcols=cols]
40
41
42
43
44
45
46

```

```

1
2
3
4     tryCatch(
5       expr=lm_rdd<-lm_rdd<-lm(tot_casualties ~ wt + poly(kt, degree=1) + poly(ktpost, degree=1) + year + dow,
6 data=data_model),
7       error=function(e) NULL
8     )
9     if(exists("lm_rdd")==TRUE){
10      #Breusch Godfrey autocorrelation test up to lag 10
11      for (l in c(1:10)){
12        tryCatch(
13          expr = assign(paste0("bgtest_",l), value=BreuschGodfreyTest(lm_rdd, order = l, order.by = data_model$kt,
14 type = "Chisq", data = data_model)),
15          error = function(e) NULL
16        )
17        tryCatch(
18          expr = assign(paste0("lag_",l), value=eval(parse(text=paste0("bgtest_",l,"$p.value")))),
19          error = function(e) NULL
20        )
21        tryCatch(
22          expr = assign(paste0("b",l),value=eval(parse(text=paste0("data.table(as.numeric(lag_",l,"),"",l,""))))),
23          error = function(e) NULL
24        )
25      }
26      tryCatch(
27        expr = bgtab<-rbind(b1,b2,b3,b4,b5,b6,b7,b8,b9,b10),
28        error = function(e) NULL
29      )
30      if (exists("bgtab")==FALSE){
31        lag_val=0
32      } else if (exists("bgtab")==TRUE){
33        bgtab_select<-bgtab[V1<=0.1]
34        if (nrow(bgtab_select)>=1){
35          lag_val=max(bgtab_select$V2)
36        } else if (lag_1>0.1){
37          lag_val=0
38        }
39      }
40
41
42
43
44
45
46

```

```

1
2
3     #Bruesch Pagan heteroskedasticity test
4     bp_pval=bptest(lm_rdd)$p.value
5     if (is.na(bp_pval)){
6         bp_pval=100
7     }
8     #adjust errors if needed to account for autocorrelation or heteroskedasticity
9     if (lag_val>0){
10        nw_vcov <- NeweyWest(lm_rdd, order.by = data_model$kt, data=data_model, lag = lag_val, prewhite = F,
11 adjust = T)
12        lmsum<-as.matrix(coeftest(lm_rdd, vcov = nw_vcov))
13        lm_sum<-lmsum[2,]
14    } else if (lag_val==0 & bp_pval<=0.1){
15        hc_vcov <- vcovHC(lm_rdd)
16        lmsum<-as.matrix(coeftest(lm_rdd, vcov = hc_vcov))
17        lm_sum<-lmsum[2,]
18    } else if (lag_val==0 & bp_pval>0.1){
19        lmsum<-as.matrix(summary(lm_rdd)$coefficients)
20        lm_sum<-lmsum[2,]
21    }
22
23    data_model_l<-data_model[time_variable_tp<0]
24    data_model_r<-data_model[time_variable_tp>=0]
25    totcas_l=sum(data_model_l$tot_casualties)
26    totcas_r=sum(data_model_r$tot_casualties)
27    n_year=length(unique(data_model$year))
28
29    resultslines<-
30    data.table(i,t,j,lm_sum[[1]],lm_sum[[2]],lm_sum[[4]],nrow(data_model),nrow(data_model_l),nrow(data_model_r),
31              as.numeric(bwl+j),as.numeric(bwr+j),as.numeric(lag_val),as.numeric(bp_pval),
32              summary(lm_rdd)$r.squared, summary(lm_rdd)$adj.r.squared, BIC(lm_rdd),
33    AIC(lm_rdd),totcas_l,totcas_r,n_year)
34    names(resultslines)<-c("model_no","tp","bw_adjust","coef","se", "pval",
35    "n_tot","n_left","n_right","bw_l","bw_r","lag","bp_pval",
36    "rsq","adj_rsq","bic","aic","totcas_l","totcas_r","n_year")
37    return(resultslines)
38  }}
39
40
41
42
43
44
45
46

```



```
1
2
3     #run for different bandwidths as follows:
4     seq_bw<-c(1,0,-1)
5     results_table<-c()
6     for (j in seq_bw){
7         calcs<-rdd_bwtrial(j)
8         results_table<-rbind(calcs,results_table)
9     }
10    return(results_table)
11  }}
12
13
14  #Run functions and save output as csv files
15  param_table<-c()
16  for (i in seq_i){
17      for (t in seq_t){
18          data_raw<-eval(parse(text=paste0("data_",i)))
19          data<-data_raw[tp==t]
20          param_table<-rbind(param_table,inputparams(i,t))
21      }}
22  write.csv(param_table, file="model_params.csv", row.names=FALSE)
23
24  poly_table<-c()
25  for (i in seq_i){
26      for (t in seq_t){
27          data_raw<-eval(parse(text=paste0("data_",i)))
28          data<-data_raw[tp==t]
29          mod_paras<-fread("model_params.csv")
30          poly_table<-rbind(poly_table,rdd_calcs_poly(i,t))
31      }}
32  write.csv(poly_table, file="results_polytrial.csv", row.names=FALSE)
33
34  bw_table<-c()
35  for (i in seq_i){
36      for (t in seq_t){
37          data_raw<-eval(parse(text=paste0("data_",i)))
38          data<-data_raw[tp==t]
39          mod_paras<-fread("model_params.csv")
40
41
42
43
44
45
46
```

```
1
2
3     bw_table<-rbind(bw_table,rdd_calcs_bw(i,t))
4 }}
5 write.csv(bw_table, file="results_bwtrial.csv", row.names=FALSE)
6
7 #####
8 #Script for placebo tests as per Guido W. Imbens and Thomas Lemieux. Regression discontinuity designs: A guide to
9 practice. Journal of Econometrics, 142:615–635, 2008.
10 #We use the same bandwidth as per the associated original models in file "model_params.csv" as generated in script
11 "rdd_models.R"
12
13 #attach packages
14 library(data.table)
15 library(DescTools)
16 library(rdrobust)
17 library(sandwich)
18 library(lmtest)
19
20 #set working directory
21 setwd("~/Documents/DST")
22
23 #Define sequences of data sets
24 #The STATS19 data have been segmented into separate files representing 7 easting and 13 northing bands and 1
25 aggregate data set (21 files in total)
26 #Datasets are named with same text prefix "data_", different numerical suffix "i"
27 #We define the sequence of datasets as seq_i, which refers to the 21 segmented datasets described above
28 #We define seq_q so that we can split each data set into pre- ("left") and post- ("right") DST for 2 placebo tests
29 per original model
30 #We define seq_t as the sequence of time periods ranging from 1 to 5
31 #The functions will iterate through all sequences and output results tables with all models' results
32 seq_i<-c(1:21)
33 seq_q<-c("left","right")
34 seq_t<-c(1:5)
35
36 #Define functions:
37 #rdd_calcs_poly function performs RDD with optimal bandwidth, and trials different polynomials for time
38 #rdd_calcs_bw function trials RDD with different bandwidths for linear in time form
39
40
41
42
43
44
45
46
```

```

1
2
3 rdd_calcs_poly<-function(i,q,t){
4   #extract bandwidth info
5   paras_iq<-mod_paras[model_no==i & tp==t]
6   bwl=paras_iq$bw_mainl
7   bwr=paras_iq$bw_mainr
8   bwexists=paras_iq$bw_exists
9
10  if (bwexists==1){
11    #prepare data: need wt, kt and ktpost variables
12    data_model<-data[time_variable_tp>=cut-bwl & time_variable_tp<cut+bwr]
13    data_model<-data_model[time_variable_tp>=cut, wt:=1]
14    data_model<-data_model[time_variable_tp<cut, wt:=0]
15    mintp=min(data_model$time_variable_tp)
16    interventiontp=abs(mintp)+1
17    data_model<-data_model[,kt:=interventiontp+time_variable_tp]
18    data_model<-data_model[wt==0, ktpost:=0]
19    maxkt_wt0=max(data_model[wt==0]$kt)
20    data_model<-data_model[wt==1, ktpost:=kt-maxkt_wt0]
21
22    cols<-c("dow", "year")
23    data_model<-data_model[, (cols):=lapply(.SD, as.factor), .SDcols=cols]
24
25    rdd_polytrial<-function(j){
26
27      tryCatch(
28        expr=lm_rdd<-lm(tot_casualties ~ wt + poly(kt, degree=j) + poly(ktpost, degree=j) + dow + year,
29          data=data_model),
30        error=function(e) NULL
31      )
32      if(exists("lm_rdd")==TRUE){
33        #Breusch Godfrey autocorrelation test up to lag 10
34        for (l in c(1:10)){
35          tryCatch(
36            expr = assign(paste0("bgtest_",l), value=BreuschGodfreyTest(lm_rdd, order = l, order.by = data_model$kt,
37              type = "Chisq", data = data_model)),
38            error = function(e) NULL
39          )
40
41
42
43
44
45
46

```

```

1
2
3     tryCatch(
4       expr = assign(paste0("lag_",l), value=eval(parse(text=paste0("bgtest_",l,"$p.value")))),
5       error = function(e) NULL
6     )
7     tryCatch(
8       expr = assign(paste0("b",l),value=eval(parse(text=paste0("data.table(as.numeric(lag_",l,""),",",l,""))))),
9       error = function(e) NULL
10    )
11  }
12  tryCatch(
13    expr = bgtab<-rbind(b1,b2,b3,b4,b5,b6,b7,b8,b9,b10),
14    error = function(e) NULL
15  )
16  if (exists("bgtab")==FALSE){
17    lag_val=0
18  } else if (exists("bgtab")==TRUE){
19    bgtab_select<-bgtab[V1<=0.1]
20    if (nrow(bgtab_select)>=1){
21      lag_val=max(bgtab_select$V2)
22    } else if (lag_1>0.1){
23      lag_val=0
24    }
25  }
26  #Bruesch Pagan heteroskedasticity test
27  bp_pval=bptest(lm_rdd)$p.value
28  if (is.na(bp_pval)){
29    bp_pval=100
30  }
31  #adjust errors if needed to account for autocorrelation or heteroskedasticity
32  if (lag_val>0){
33    nw_vcov <- NeweyWest(lm_rdd, order.by = data_model$kt, data=data_model, lag = lag_val, prewhite = F,
34  adjust = T)
35    lmsum<-as.matrix(coeftest(lm_rdd, vcov = nw_vcov))
36    lm_sum<-lmsum[2,]
37  } else if (lag_val==0 & bp_pval<=0.1){
38    hc_vcov <- vcovHC(lm_rdd)
39    lmsum<-as.matrix(coeftest(lm_rdd, vcov = hc_vcov))
40
41
42
43
44
45
46

```

```

1
2
3     lm_sum<-lmsum[2,]
4 } else if (lag_val==0 & bp_pval>0.1){
5     lmsum<-as.matrix(summary(lm_rdd)$coefficients)
6     lm_sum<-lmsum[2,]
7 }
8
9     data_model_l<-data_model[wt==0]
10    data_model_r<-data_model[wt==1]
11
12    resultsline<-
13 data.table(i,q,t,j,lm_sum[[1]],lm_sum[[2]],lm_sum[[4]],nrow(data_model),nrow(data_model_l),nrow(data_model_r),
14            as.numeric(bwl),as.numeric(bwr),as.numeric(lag_val),as.numeric(bp_pval),
15            summary(lm_rdd)$r.squared, summary(lm_rdd)$adj.r.squared, BIC(lm_rdd), AIC(lm_rdd))
16    names(resultsline)<-c("model_no","data","tp","poly_deg","coef","se", "pval",
17 "n_tot","n_left","n_right","bw_l","bw_r","lag","bp_pval",
18 "rsq","adj_rsq","bic","aic")
19    return(resultsline)
20  }}
21  #run for polynomials order 1 to 4
22  results_table<-c()
23  for (j in 1:4){
24    calcs<-rdd_polytrial(j)
25    results_table<-rbind(calcs,results_table)
26  }
27  return(results_table)
28  }}
29
30 rdd_calcs_bw<-function(i,q,t){
31   #extract bandwidth info
32   paras_iq<-mod_paras[model_no==i & tp==t]
33   bwl=paras_iq$bw_mainl
34   bwr=paras_iq$bw_mainr
35   bwexists=paras_iq$bw_exists
36
37   if (bwexists==1){
38     rdd_bwtrial<-function(j){
39
40
41
42
43
44
45
46

```

```

1
2
3 #prepare data: need wt, kt and ktpost variables
4 newcut=cut+j
5 data_model<-data[time_variable_tp>=newcut-bwl & time_variable_tp<newcut+bwr]
6 data_model<-data_model[time_variable_tp>=newcut, wt:=1]
7 data_model<-data_model[time_variable_tp<newcut, wt:=0]
8 mintp=min(data_model$time_variable_tp)
9 interventiontp=abs(mintp)+1
10 data_model<-data_model[,kt:=interventiontp+time_variable_tp]
11 data_model<-data_model[wt==0, ktpost:=0]
12 maxkt_wt0=max(data_model[wt==0]$kt)
13 data_model<-data_model[wt==1, ktpost:=kt-maxkt_wt0]
14
15 cols<-c("dow", "year")
16 data_model<-data_model[, (cols):=lapply(.SD, as.factor), .SDcols=cols]
17
18 tryCatch(
19   expr=lm_rdd<-lm_rdd<-lm(tot_casualties ~ wt + poly(kt, degree=1) + poly(ktpost, degree=1) + dow + year,
20 data=data_model),
21   error=function(e) NULL
22 )
23 if(exists("lm_rdd")==TRUE){
24   #Breusch Godfrey autocorrelation test up to lag 10
25   for (l in c(1:10)){
26     tryCatch(
27       expr = assign(paste0("bgtest_",l), value=BreuschGodfreyTest(lm_rdd, order = l, order.by = data_model$kt,
28 type = "Chisq", data = data_model)),
29       error = function(e) NULL
30     )
31     tryCatch(
32       expr = assign(paste0("lag_",l), value=eval(parse(text=paste0("bgtest_",l,"$p.value")))),
33       error = function(e) NULL
34     )
35     tryCatch(
36       expr = assign(paste0("b",l),value=eval(parse(text=paste0("data.table(as.numeric(lag_",l,","),",",l,""))))),
37       error = function(e) NULL
38     )
39   }
40
41
42
43
44
45
46

```

```
1
2
3   tryCatch(
4     expr = bgtab<-rbind(b1,b2,b3,b4,b5,b6,b7,b8,b9,b10),
5     error = function(e) NULL
6   )
7   if (exists("bgtab")==FALSE){
8     lag_val=0
9   } else if (exists("bgtab")==TRUE){
10    bgtab_select<-bgtab[V1<=0.1]
11    if (nrow(bgtab_select)>=1){
12      lag_val=max(bgtab_select$V2)
13    } else if (lag_1>0.1){
14      lag_val=0
15    }
16  }
17  #Bruesch Pagan heteroskedasticity test
18  bp_pval=bptest(lm_rdd)$p.value
19  if (is.na(bp_pval)){
20    bp_pval=100
21  }
22  #adjust errors if needed to account for autocorrelation or heteroskedasticity
23  if (lag_val>0){
24    nw_vcov <- NeweyWest(lm_rdd, order.by = data_model$kt, data=data_model, lag = lag_val, prewhite = F,
25  adjust = T)
26    lmsum<-as.matrix(coeftest(lm_rdd, vcov = nw_vcov))
27    lm_sum<-lmsum[2,]
28  } else if (lag_val==0 & bp_pval<=0.1){
29    hc_vcov <- vcovHC(lm_rdd)
30    lmsum<-as.matrix(coeftest(lm_rdd, vcov = hc_vcov))
31    lm_sum<-lmsum[2,]
32  } else if (lag_val==0 & bp_pval>0.1){
33    lmsum<-as.matrix(summary(lm_rdd)$coefficients)
34    lm_sum<-lmsum[2,]
35  }
36
37  data_model_l<-data_model[wt==0]
38  data_model_r<-data_model[wt==1]
39
40
41
42
43
44
45
46
```

```

1
2
3     resultsline<-
4 data.table(i,q,t,j,lm_sum[[1]],lm_sum[[2]],lm_sum[[4]],nrow(data_model),nrow(data_model_l),nrow(data_model_r),
5             as.numeric(bwl+j),as.numeric(bwr+j),as.numeric(lag_val),as.numeric(bp_pval),
6             summary(lm_rdd)$r.squared, summary(lm_rdd)$adj.r.squared, BIC(lm_rdd), AIC(lm_rdd))
7     names(resultsline)<-c("model_no","data","tp","bw_adjust","coef","se", "pval",
8 "n_tot","n_left","n_right","bw_l","bw_r","lag","bp_pval",
9             "rsq","adj_rsq","bic","aic")
10    return(resultsline)
11  }}
12
13  #run for different bandwidths as follows:
14  seq_bw<-c(1,0,-1)
15  results_table<-c()
16  for (j in seq_bw){
17    calcs<-rdd_bwtrial(j)
18    results_table<-rbind(calcs,results_table)
19  }
20  return(results_table)
21  }}
22
23
24  #Run functions and save output as csv files
25  poly_table<-c()
26  for (i in seq_i){
27    for (q in seq_q){
28      for (t in seq_t){
29        data_raw<-eval(parse(text=paste0("data_",i)))
30        data_tp<-data_raw[tp==t]
31        if (q=="left"){
32          data<-data_tp[time_variable_tp<0]
33          cut=round(mean(data$time_variable_tp))
34        } else if (q=="right"){
35          data<-data_tp[time_variable_tp>=0]
36          cut=round(mean(data$time_variable_tp))
37        }
38        mod_paras<-fread("model_params.csv")
39        poly_table<-rbind(poly_table,rdd_calcs_poly(i,q,t))
40
41
42
43
44
45
46

```



```
1
2
3   }}}
4 write.csv(poly_table, file="results_placebo_polytrial.csv", row.names=FALSE)
5
6 bw_table<-c()
7 for (i in seq_i){
8   for (q in seq_q){
9     for (t in seq_t){
10      data_raw<-eval(parse(text=paste0("data_",i)))
11      data_tp<-data_raw[tp==t]
12      if (q=="left"){
13        data<-data_tp[time_variable_tp<0]
14        cut=round(mean(data$time_variable_tp))
15      } else if (q=="right"){
16        data<-data_tp[time_variable_tp>=0]
17        cut=round(mean(data$time_variable_tp))
18      }
19      mod_paras<-fread("model_params.csv")
20      bw_table<-rbind(bw_table,rdd_calcs_bw(i,t))
21    }}}
22 write.csv(bw_table, file="results_placebo_bwtrial.csv", row.names=FALSE)
23
24
25
26
27
28
29
30
31
32
33
34
35
36
37
38
39
40
41
42
43
44
45
46
```

## STROBE Statement—checklist of items that should be included in reports of observational studies

|                              | Item No                                                                                                                                                                                                                                                                                                   | Recommendation                                                                                                                                                                                                                                                                                                                                                                                                                                                         | Page No |
|------------------------------|-----------------------------------------------------------------------------------------------------------------------------------------------------------------------------------------------------------------------------------------------------------------------------------------------------------|------------------------------------------------------------------------------------------------------------------------------------------------------------------------------------------------------------------------------------------------------------------------------------------------------------------------------------------------------------------------------------------------------------------------------------------------------------------------|---------|
| <b>Title and abstract</b>    | 1                                                                                                                                                                                                                                                                                                         | (a) Indicate the study's design with a commonly used term in the title or the abstract                                                                                                                                                                                                                                                                                                                                                                                 | 1       |
|                              |                                                                                                                                                                                                                                                                                                           | (b) Provide in the abstract an informative and balanced summary of what was done and what was found                                                                                                                                                                                                                                                                                                                                                                    | 1       |
| <b>Introduction</b>          |                                                                                                                                                                                                                                                                                                           |                                                                                                                                                                                                                                                                                                                                                                                                                                                                        |         |
| Background/rationale         | 2                                                                                                                                                                                                                                                                                                         | Explain the scientific background and rationale for the investigation being reported                                                                                                                                                                                                                                                                                                                                                                                   | 2-3     |
| Objectives                   | 3                                                                                                                                                                                                                                                                                                         | State specific objectives, including any prespecified hypotheses                                                                                                                                                                                                                                                                                                                                                                                                       | 3       |
| <b>Methods</b>               |                                                                                                                                                                                                                                                                                                           |                                                                                                                                                                                                                                                                                                                                                                                                                                                                        |         |
| Study design                 | 4                                                                                                                                                                                                                                                                                                         | Present key elements of study design early in the paper                                                                                                                                                                                                                                                                                                                                                                                                                | 3-6     |
| Setting                      | 5                                                                                                                                                                                                                                                                                                         | Describe the setting, locations, and relevant dates, including periods of recruitment, exposure, follow-up, and data collection                                                                                                                                                                                                                                                                                                                                        | 3-4     |
| Participants                 | 6                                                                                                                                                                                                                                                                                                         | (a) <i>Cohort study</i> —Give the eligibility criteria, and the sources and methods of selection of participants. Describe methods of follow-up<br><i>Case-control study</i> —Give the eligibility criteria, and the sources and methods of case ascertainment and control selection. Give the rationale for the choice of cases and controls<br><i>Cross-sectional study</i> —Give the eligibility criteria, and the sources and methods of selection of participants | NA      |
|                              |                                                                                                                                                                                                                                                                                                           | (b) <i>Cohort study</i> —For matched studies, give matching criteria and number of exposed and unexposed<br><i>Case-control study</i> —For matched studies, give matching criteria and the number of controls per case                                                                                                                                                                                                                                                 | NA      |
| Variables                    | 7                                                                                                                                                                                                                                                                                                         | Clearly define all outcomes, exposures, predictors, potential confounders, and effect modifiers. Give diagnostic criteria, if applicable                                                                                                                                                                                                                                                                                                                               | 5-6     |
| Data sources/<br>measurement | 8*                                                                                                                                                                                                                                                                                                        | For each variable of interest, give sources of data and details of methods of assessment (measurement). Describe comparability of assessment methods if there is more than one group                                                                                                                                                                                                                                                                                   | 3-6     |
| Bias                         | 9                                                                                                                                                                                                                                                                                                         | Describe any efforts to address potential sources of bias                                                                                                                                                                                                                                                                                                                                                                                                              | 5-6     |
| Study size                   | 10                                                                                                                                                                                                                                                                                                        | Explain how the study size was arrived at                                                                                                                                                                                                                                                                                                                                                                                                                              | 3-6     |
| Quantitative variables       | 11                                                                                                                                                                                                                                                                                                        | Explain how quantitative variables were handled in the analyses. If applicable, describe which groupings were chosen and why                                                                                                                                                                                                                                                                                                                                           | 5-6     |
| Statistical methods          | 12                                                                                                                                                                                                                                                                                                        | (a) Describe all statistical methods, including those used to control for confounding                                                                                                                                                                                                                                                                                                                                                                                  | 4-6     |
|                              |                                                                                                                                                                                                                                                                                                           | (b) Describe any methods used to examine subgroups and interactions                                                                                                                                                                                                                                                                                                                                                                                                    | 5-6     |
|                              | (c) Explain how missing data were addressed                                                                                                                                                                                                                                                               | 5                                                                                                                                                                                                                                                                                                                                                                                                                                                                      |         |
|                              | (d) <i>Cohort study</i> —If applicable, explain how loss to follow-up was addressed<br><i>Case-control study</i> —If applicable, explain how matching of cases and controls was addressed<br><i>Cross-sectional study</i> —If applicable, describe analytical methods taking account of sampling strategy | NA                                                                                                                                                                                                                                                                                                                                                                                                                                                                     |         |
|                              | (e) Describe any sensitivity analyses                                                                                                                                                                                                                                                                     | 6                                                                                                                                                                                                                                                                                                                                                                                                                                                                      |         |

Continued on next page

| <b>Results</b>           |     |                                                                                                                                                                                                              |       |
|--------------------------|-----|--------------------------------------------------------------------------------------------------------------------------------------------------------------------------------------------------------------|-------|
| Participants             | 13* | (a) Report numbers of individuals at each stage of study—eg numbers potentially eligible, examined for eligibility, confirmed eligible, included in the study, completing follow-up, and analysed            | NA    |
|                          |     | (b) Give reasons for non-participation at each stage                                                                                                                                                         | NA    |
|                          |     | (c) Consider use of a flow diagram                                                                                                                                                                           | NA    |
| Descriptive data         | 14* | (a) Give characteristics of study participants (eg demographic, clinical, social) and information on exposures and potential confounders                                                                     | NA    |
|                          |     | (b) Indicate number of participants with missing data for each variable of interest                                                                                                                          | NA    |
|                          |     | (c) <i>Cohort study</i> —Summarise follow-up time (eg, average and total amount)                                                                                                                             | NA    |
|                          |     | Note: No human/animal participants were involved but a summary of descriptive statistics on casualties is given                                                                                              | 4     |
| Outcome data             | 15* | <i>Cohort study</i> —Report numbers of outcome events or summary measures over time                                                                                                                          | NA    |
|                          |     | <i>Case-control study</i> —Report numbers in each exposure category, or summary measures of exposure                                                                                                         | NA    |
|                          |     | <i>Cross-sectional study</i> —Report numbers of outcome events or summary measures                                                                                                                           | NA    |
| Main results             | 16  | (a) Give unadjusted estimates and, if applicable, confounder-adjusted estimates and their precision (eg, 95% confidence interval). Make clear which confounders were adjusted for and why they were included | 6-9   |
|                          |     | (b) Report category boundaries when continuous variables were categorized                                                                                                                                    | 5-6   |
|                          |     | (c) If relevant, consider translating estimates of relative risk into absolute risk for a meaningful time period                                                                                             | NA    |
| Other analyses           | 17  | Report other analyses done—eg analyses of subgroups and interactions, and sensitivity analyses                                                                                                               | NA    |
| <b>Discussion</b>        |     |                                                                                                                                                                                                              |       |
| Key results              | 18  | Summarise key results with reference to study objectives                                                                                                                                                     | 11-15 |
| Limitations              | 19  | Discuss limitations of the study, taking into account sources of potential bias or imprecision. Discuss both direction and magnitude of any potential bias                                                   | 15    |
| Interpretation           | 20  | Give a cautious overall interpretation of results considering objectives, limitations, multiplicity of analyses, results from similar studies, and other relevant evidence                                   | 12-15 |
| Generalisability         | 21  | Discuss the generalisability (external validity) of the study results                                                                                                                                        | 15    |
| <b>Other information</b> |     |                                                                                                                                                                                                              |       |
| Funding                  | 22  | Give the source of funding and the role of the funders for the present study and, if applicable, for the original study on which the present article is based                                                | 17    |

\*Give information separately for cases and controls in case-control studies and, if applicable, for exposed and unexposed groups in cohort and cross-sectional studies.

**Note:** An Explanation and Elaboration article discusses each checklist item and gives methodological background and published examples of transparent reporting. The STROBE checklist is best used in conjunction with this article (freely available on the Web sites of PLoS Medicine at <http://www.plosmedicine.org/>, Annals of Internal Medicine at <http://www.annals.org/>, and Epidemiology at <http://www.epidem.com/>). Information on the STROBE Initiative is available at [www.strobe-statement.org](http://www.strobe-statement.org).
