# Supplementary figures and images for: Road traffic casualties in Great Britain at daylight savings time transitions: a causal regression discontinuity design analysis
Source: PubMed Central journal article supplement — BMJ Open. 2022 Apr 25;12(4):e054678. doi: 10.1136/bmjopen-2021-054678 (PMC9039378; doi:10.1136/bmjopen-2021-054678), 2022-04-25

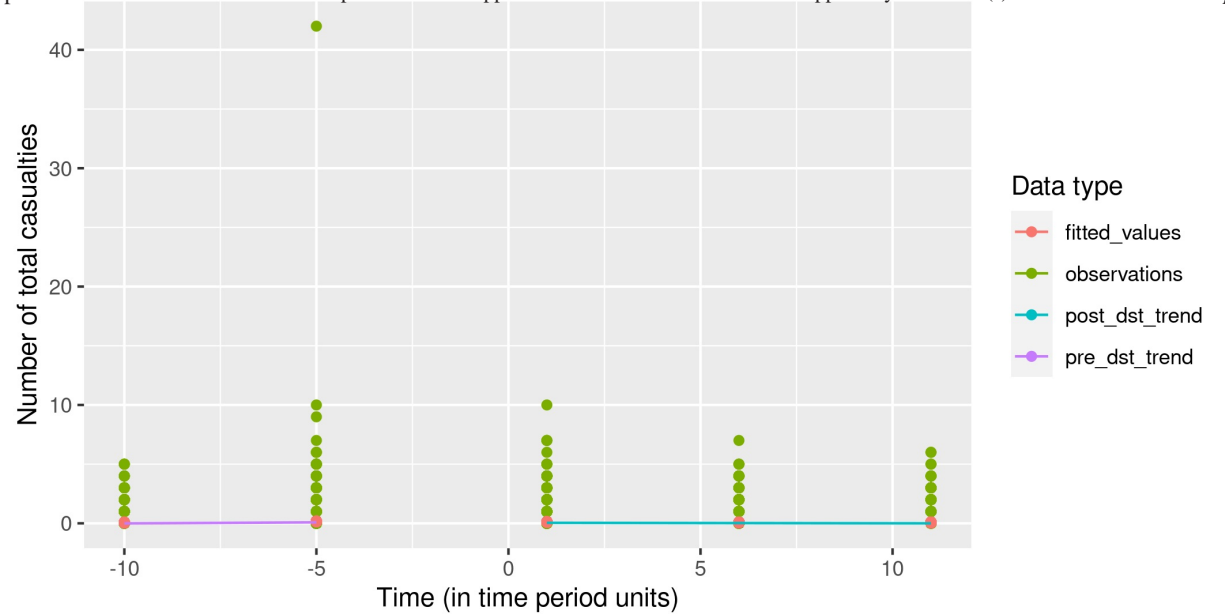



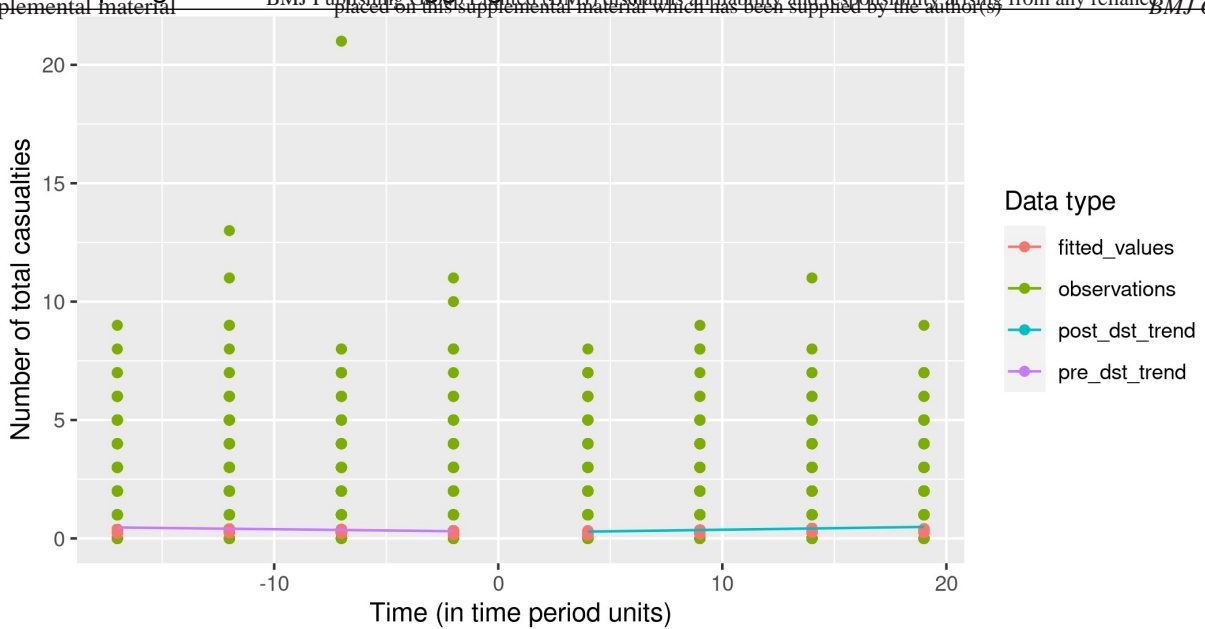

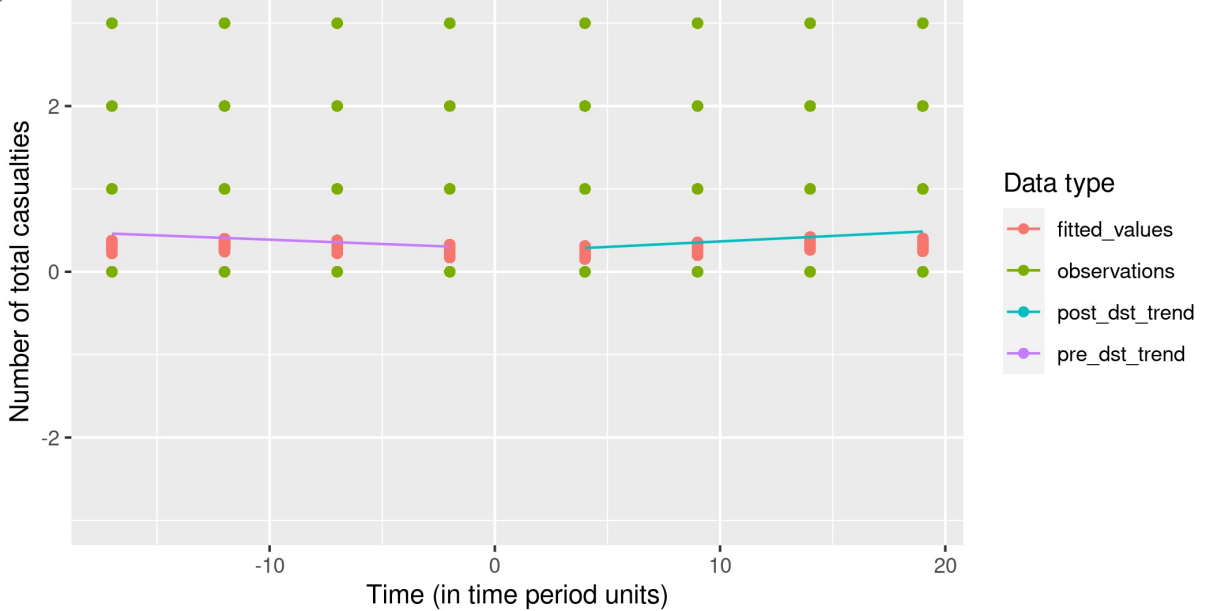

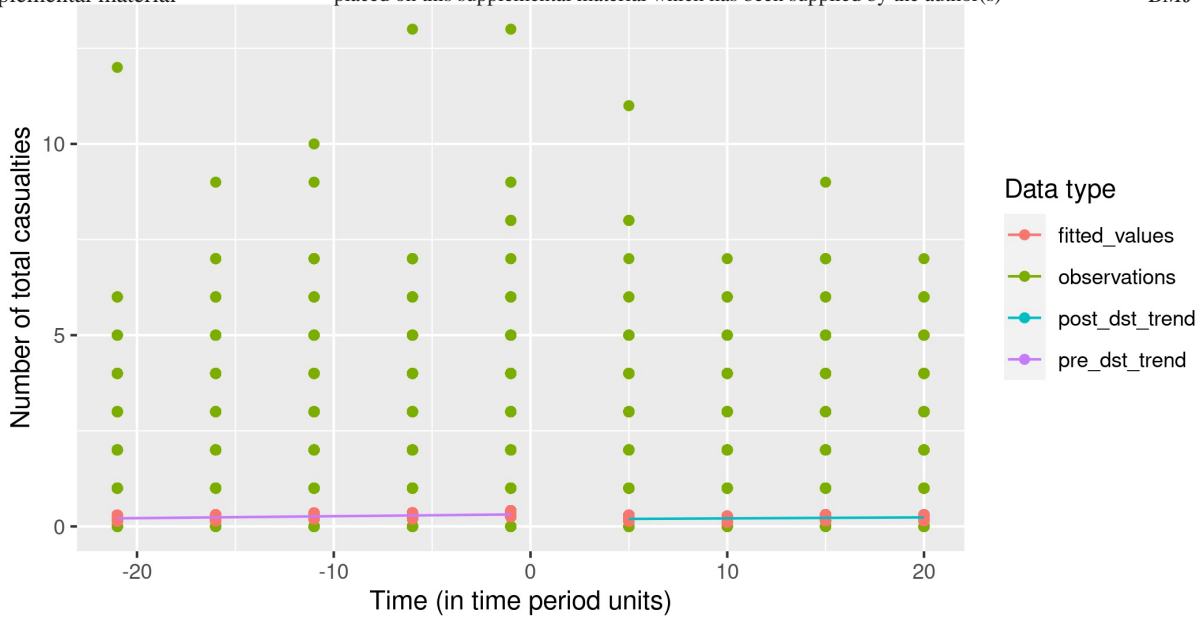

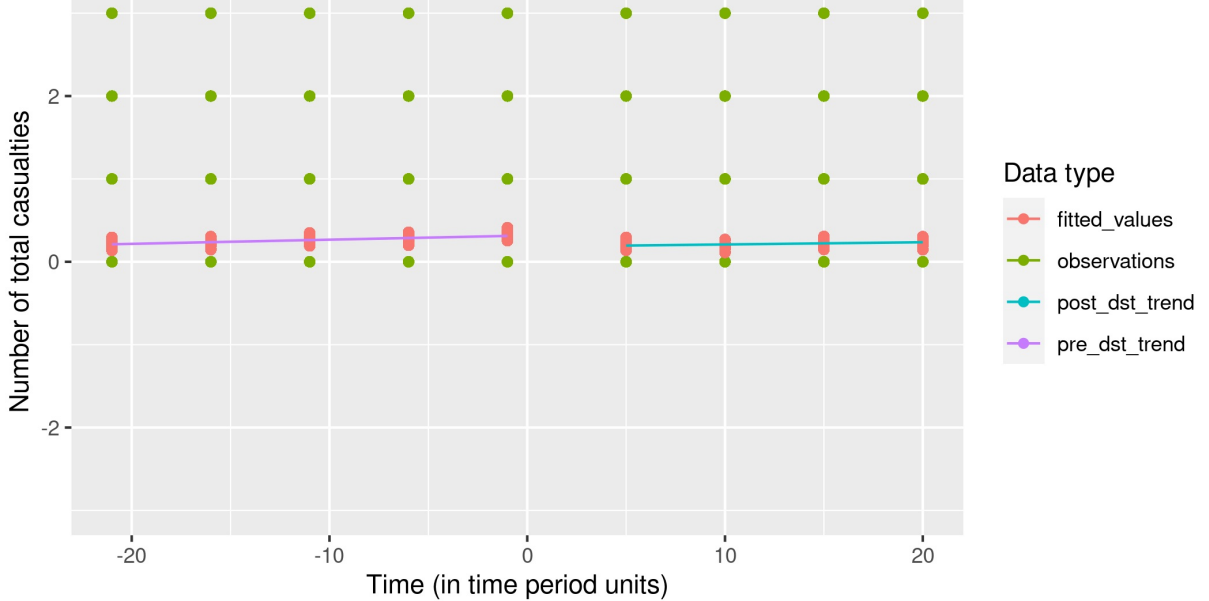

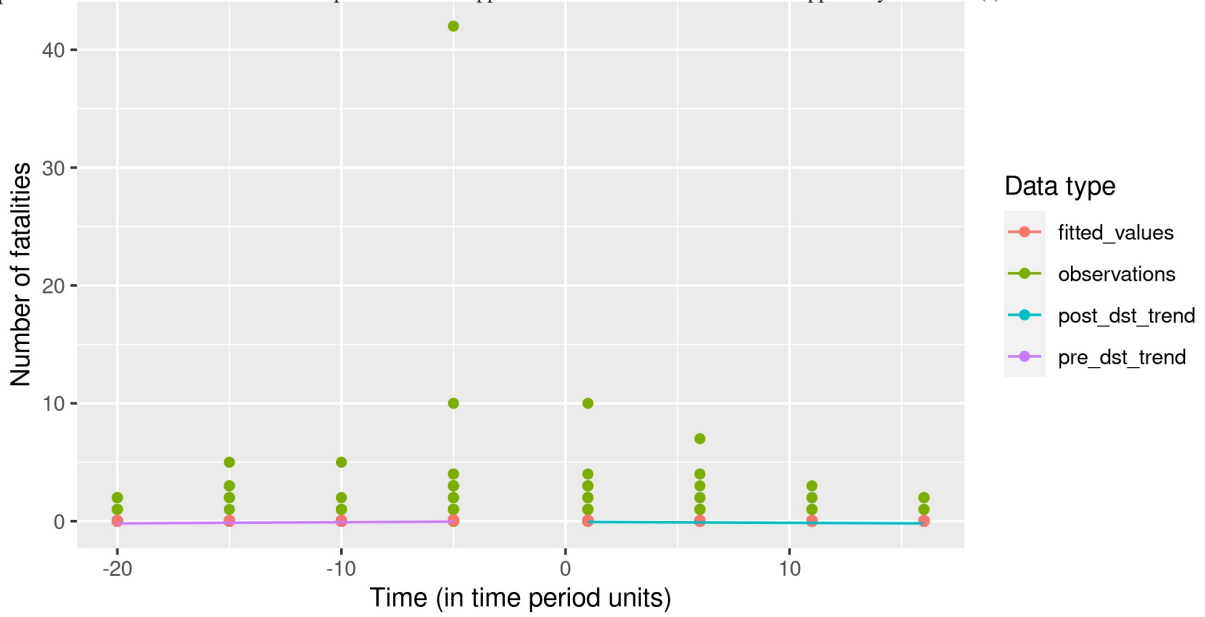

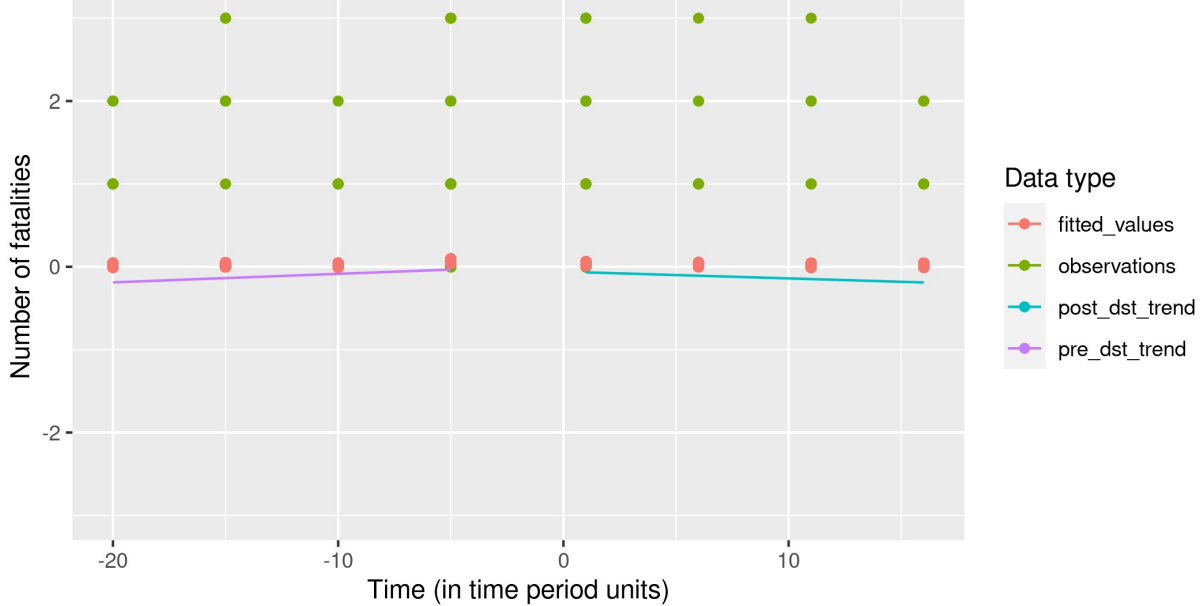



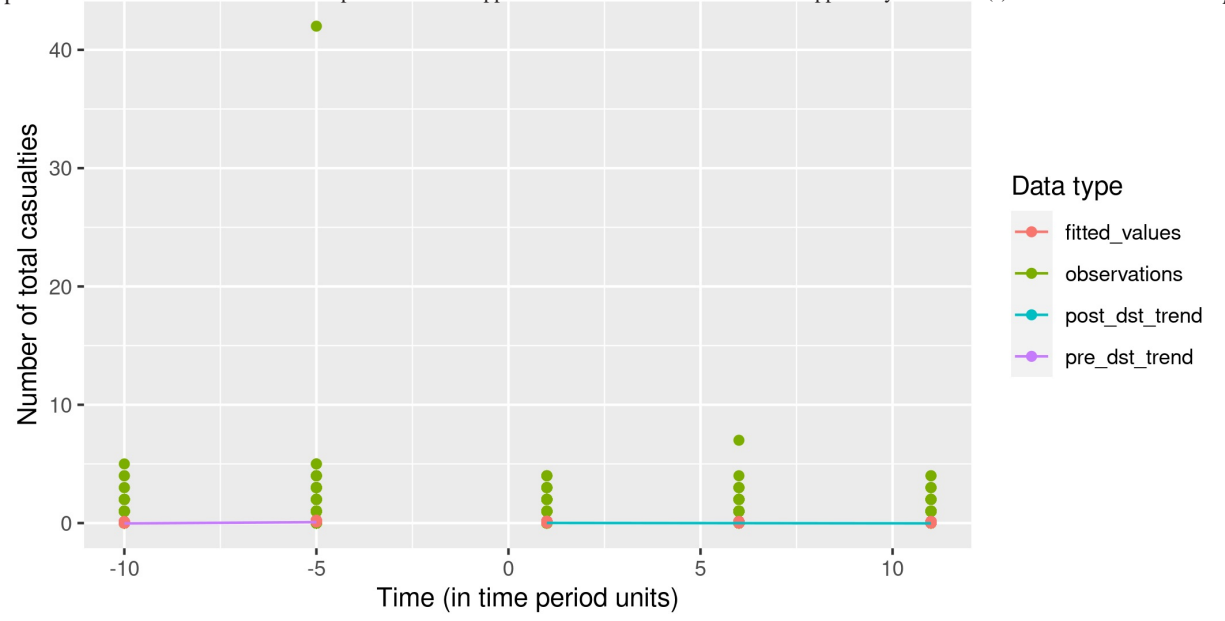

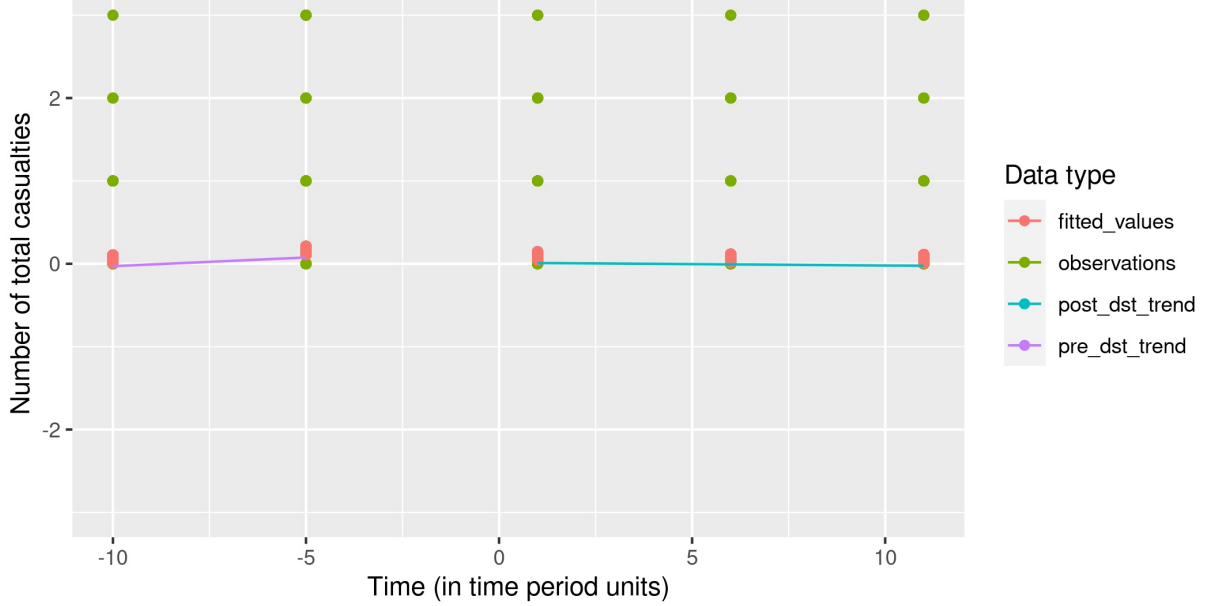

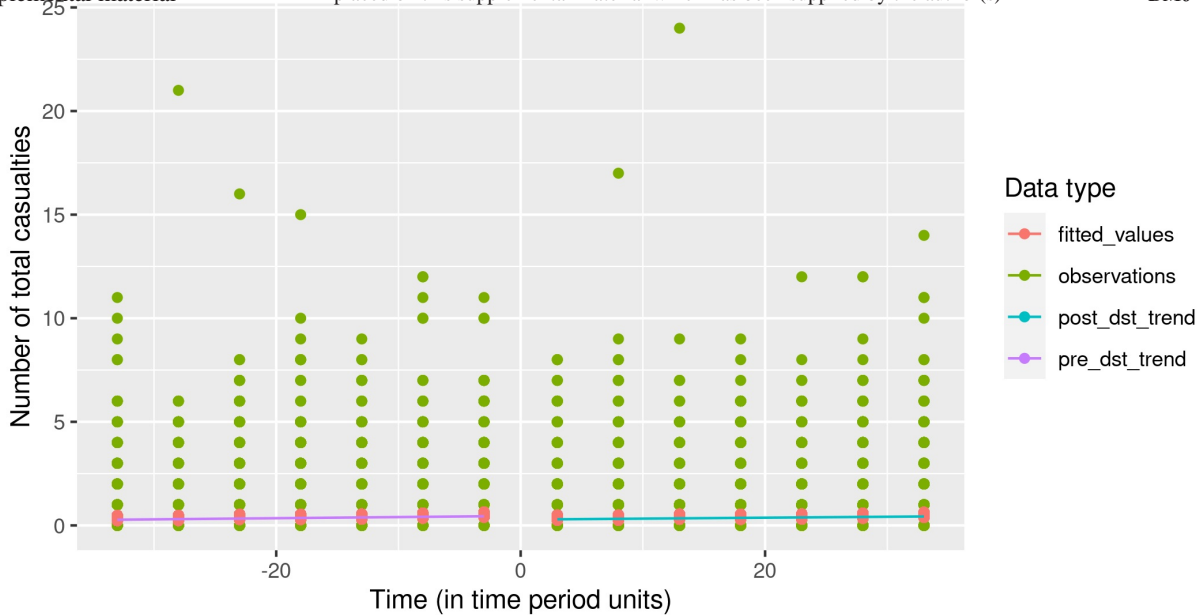

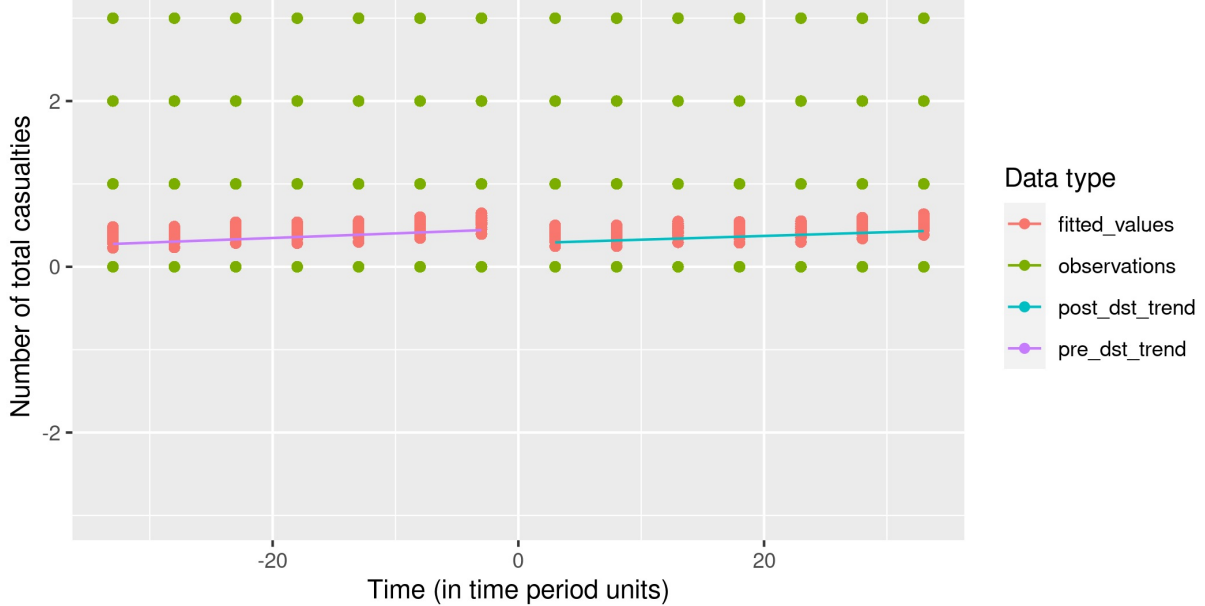

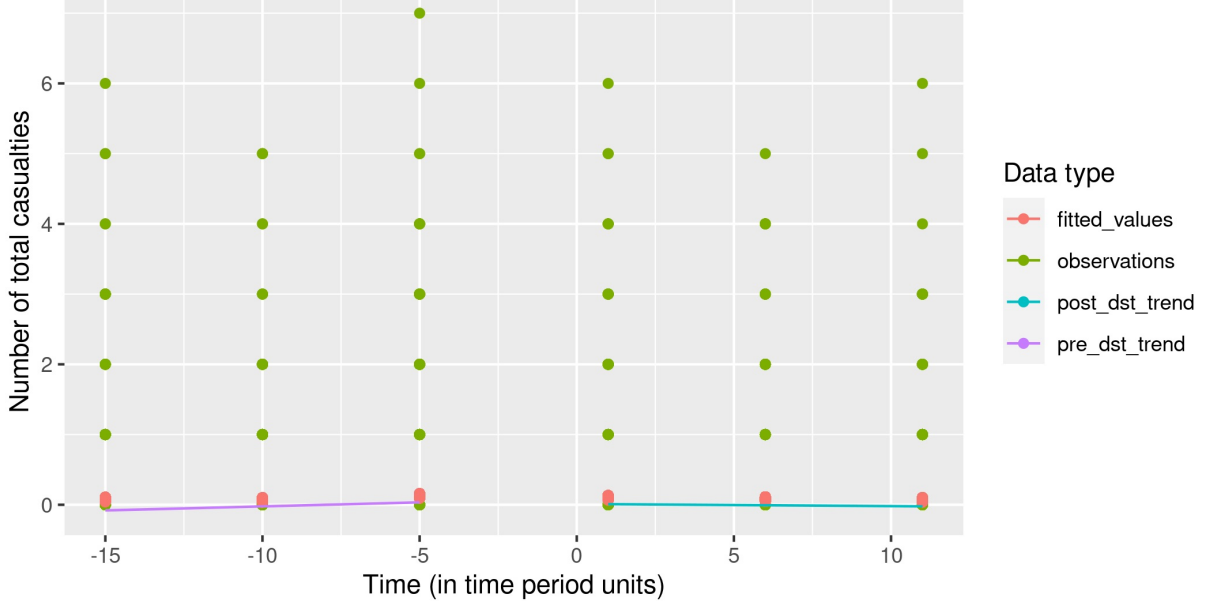

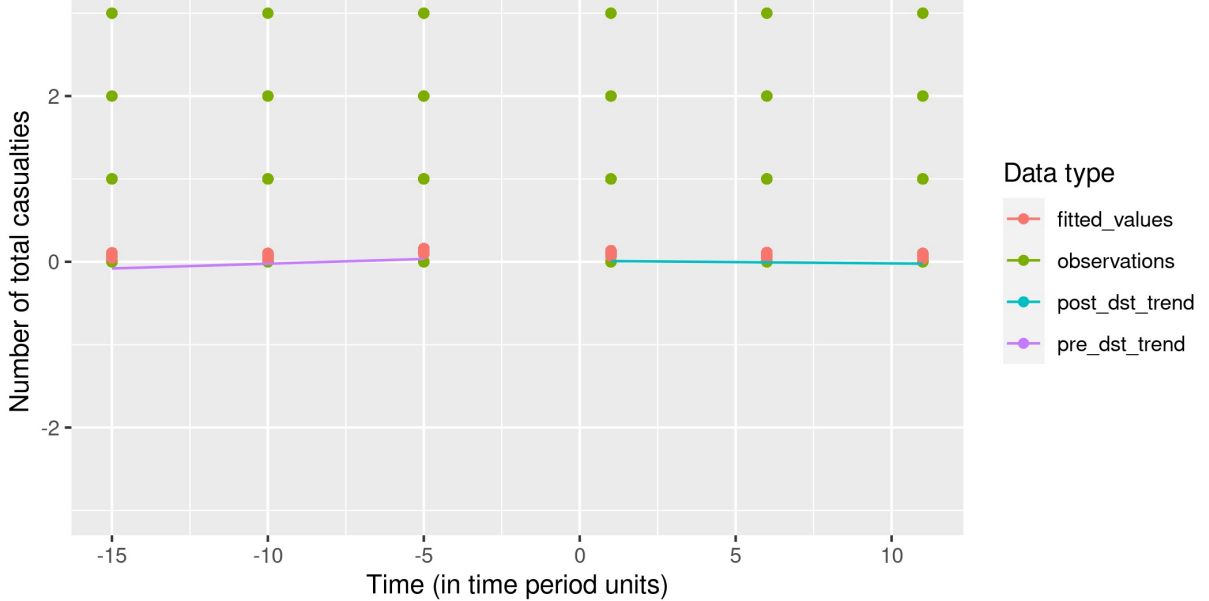

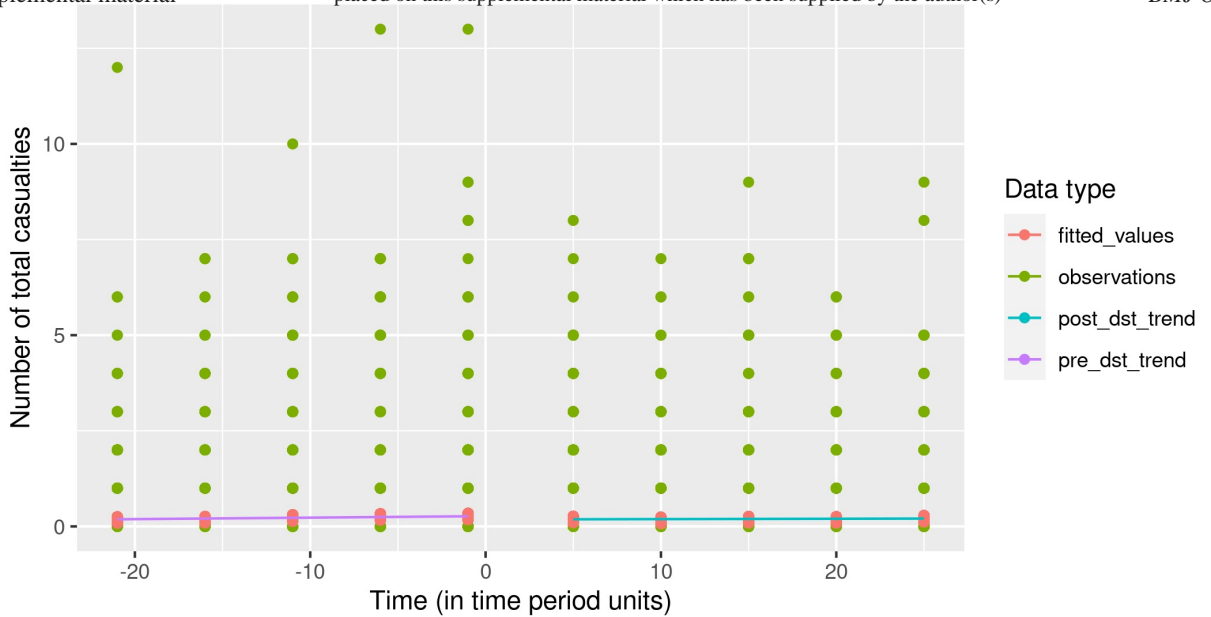

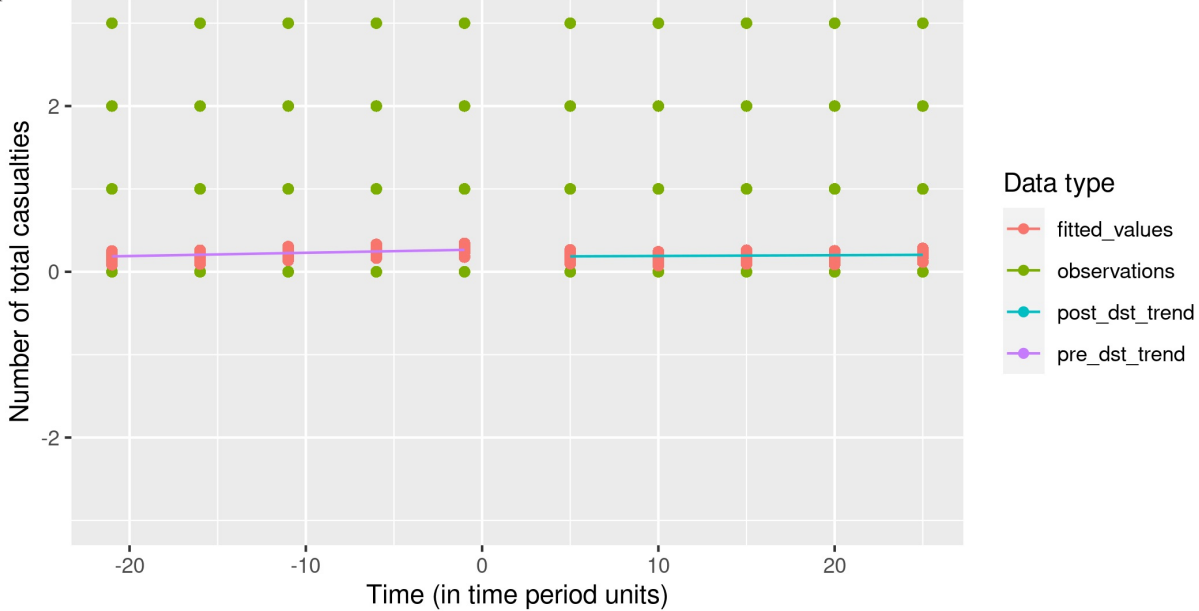



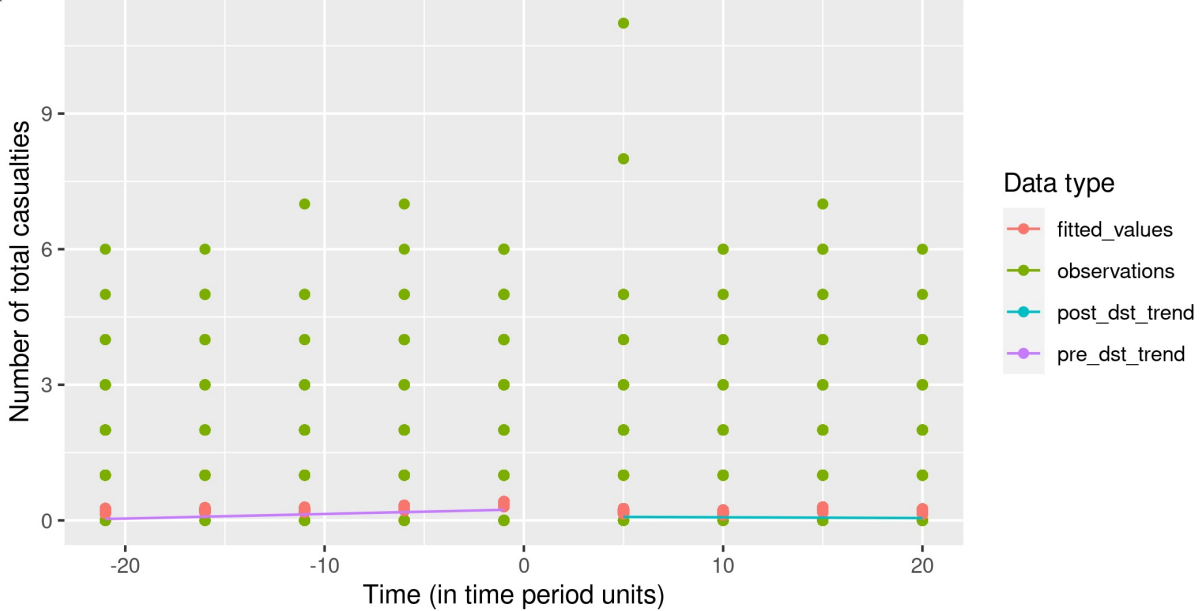

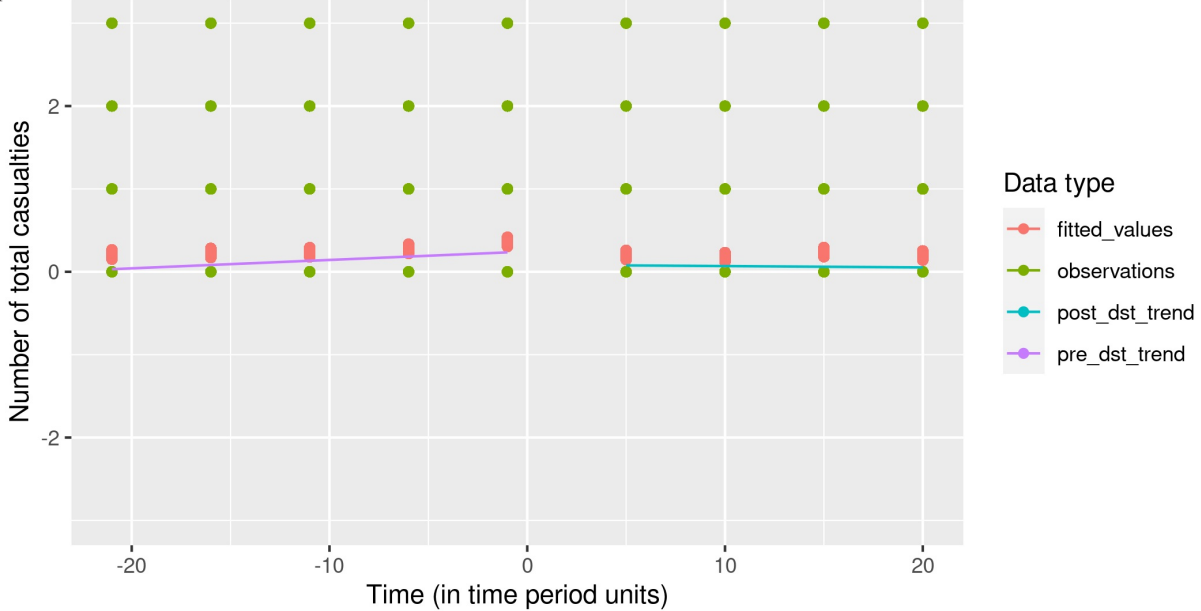

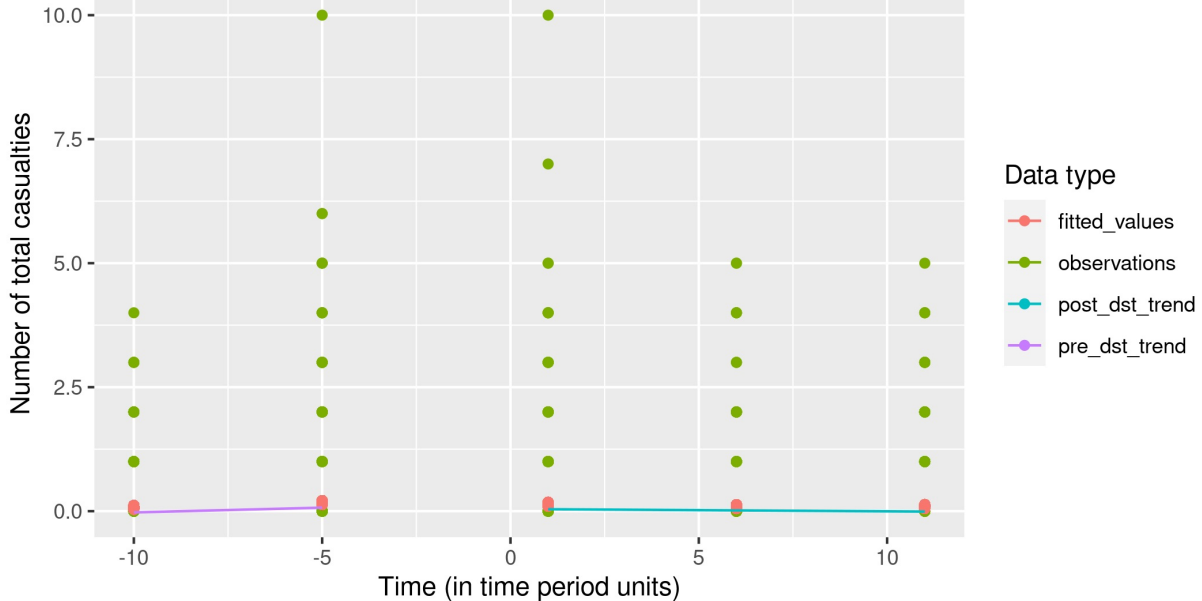

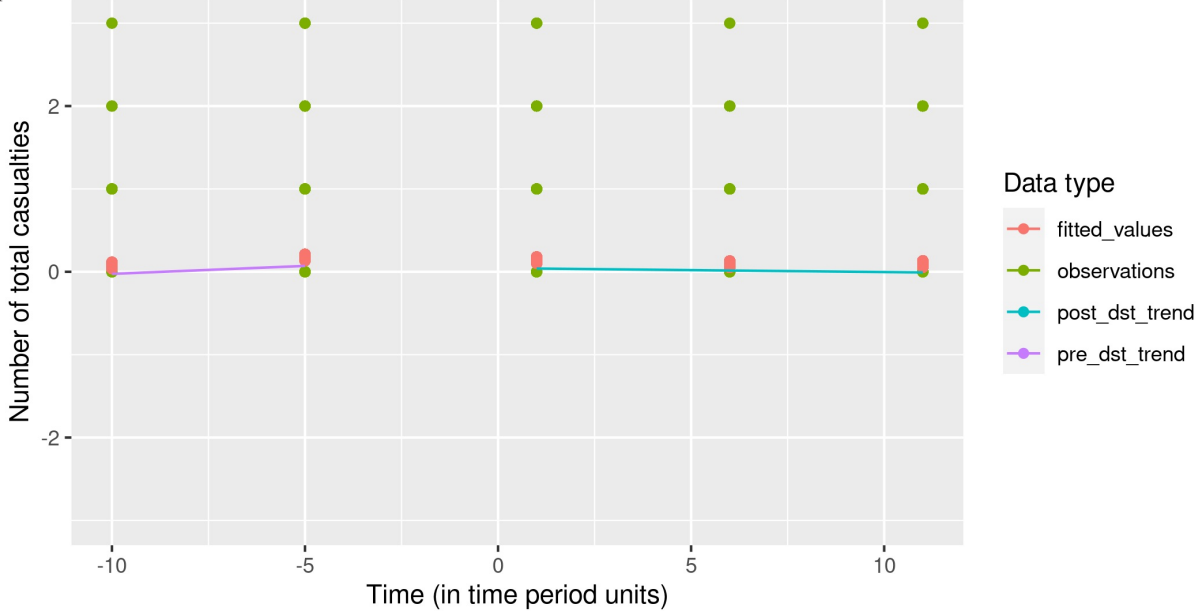

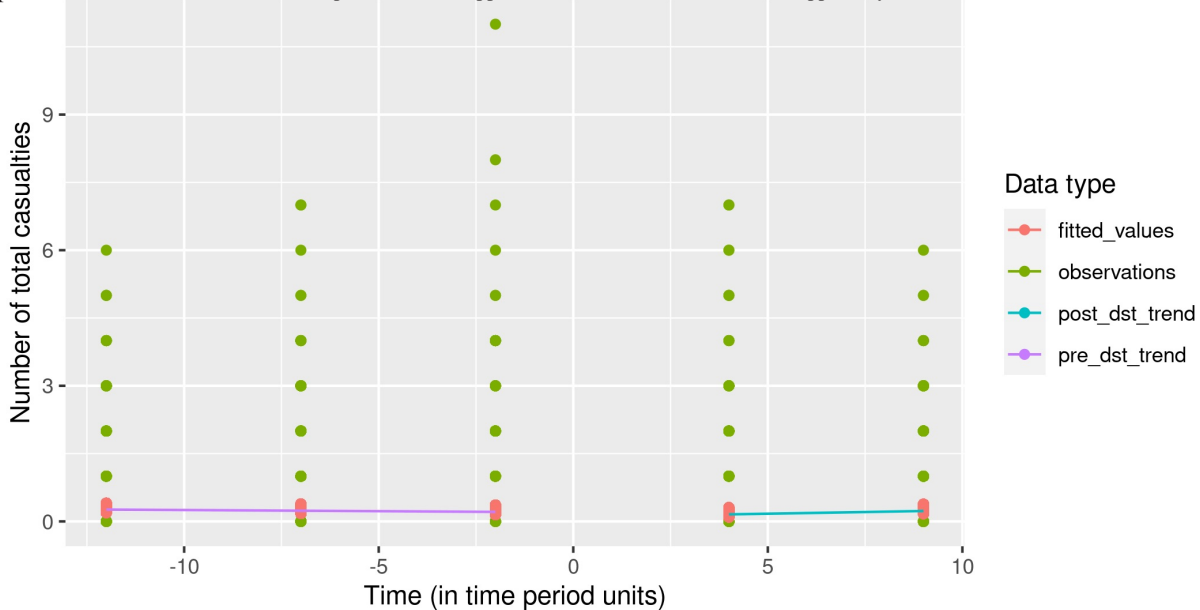

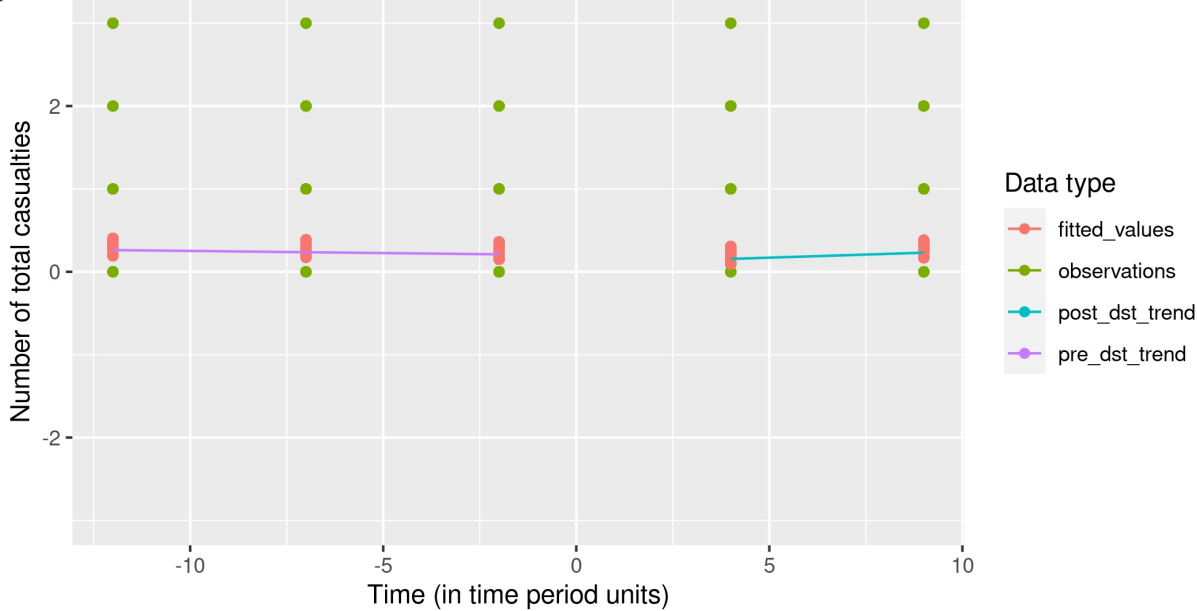

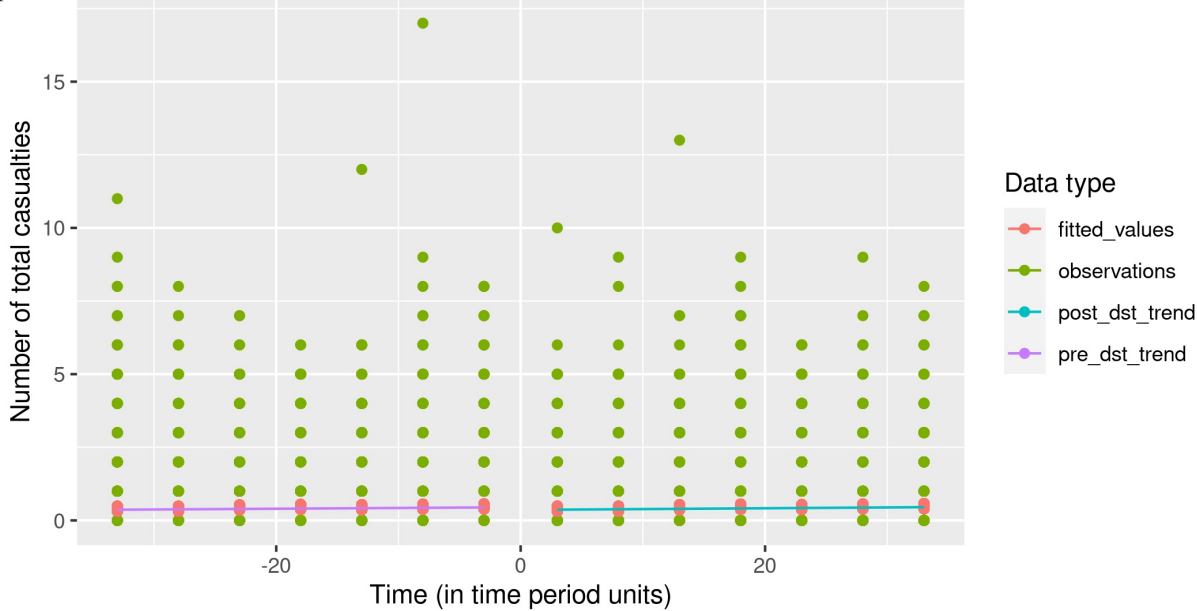

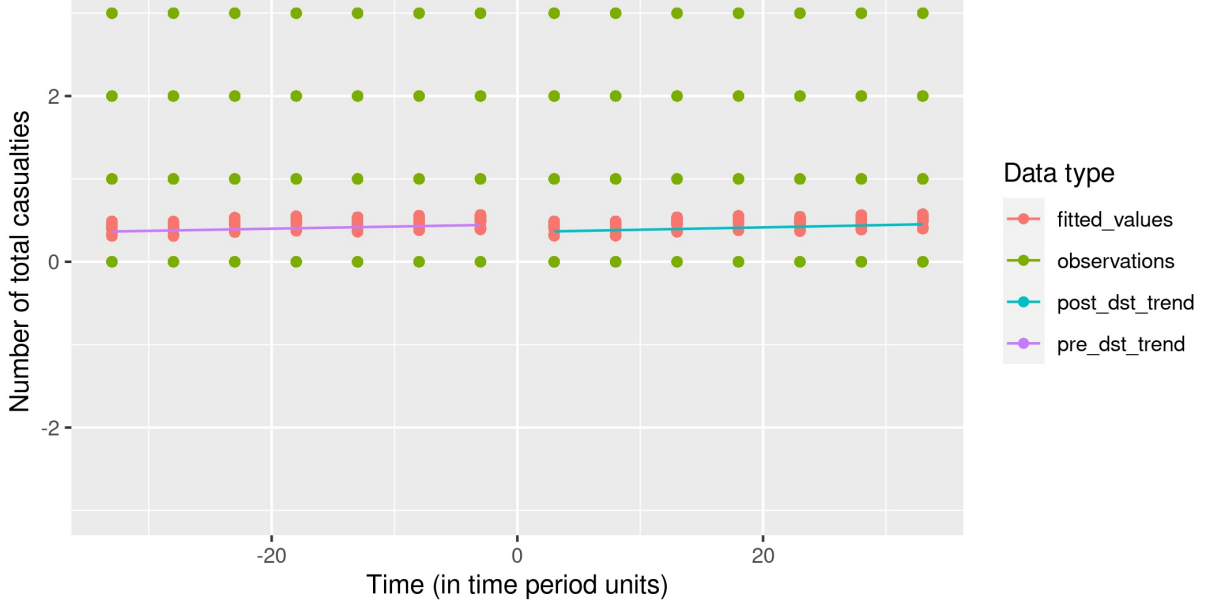



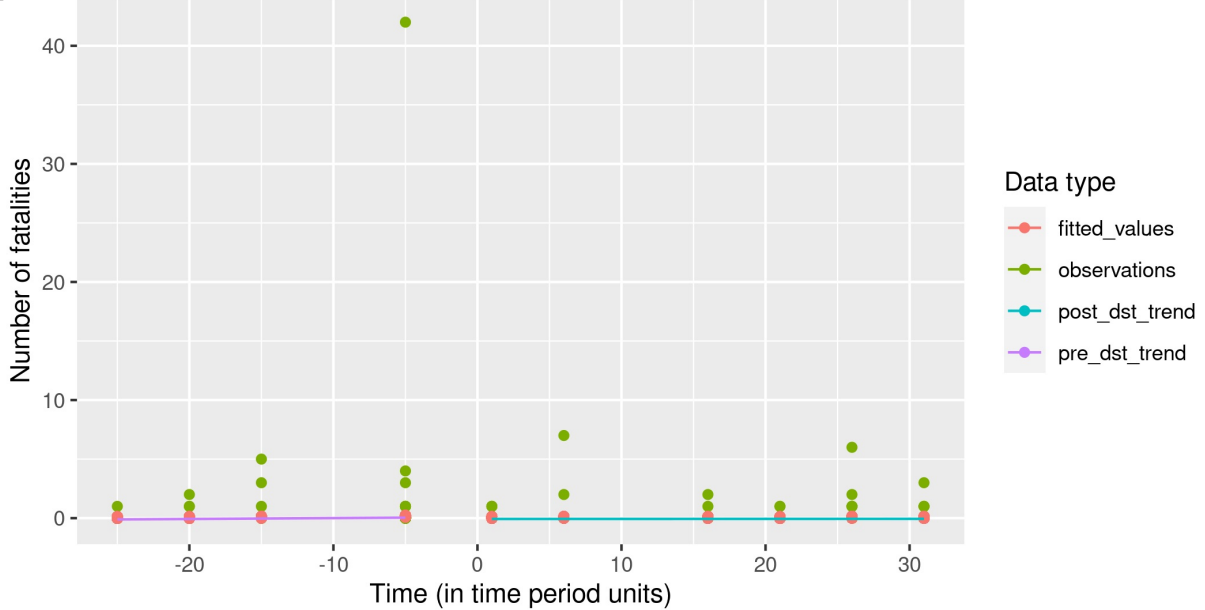

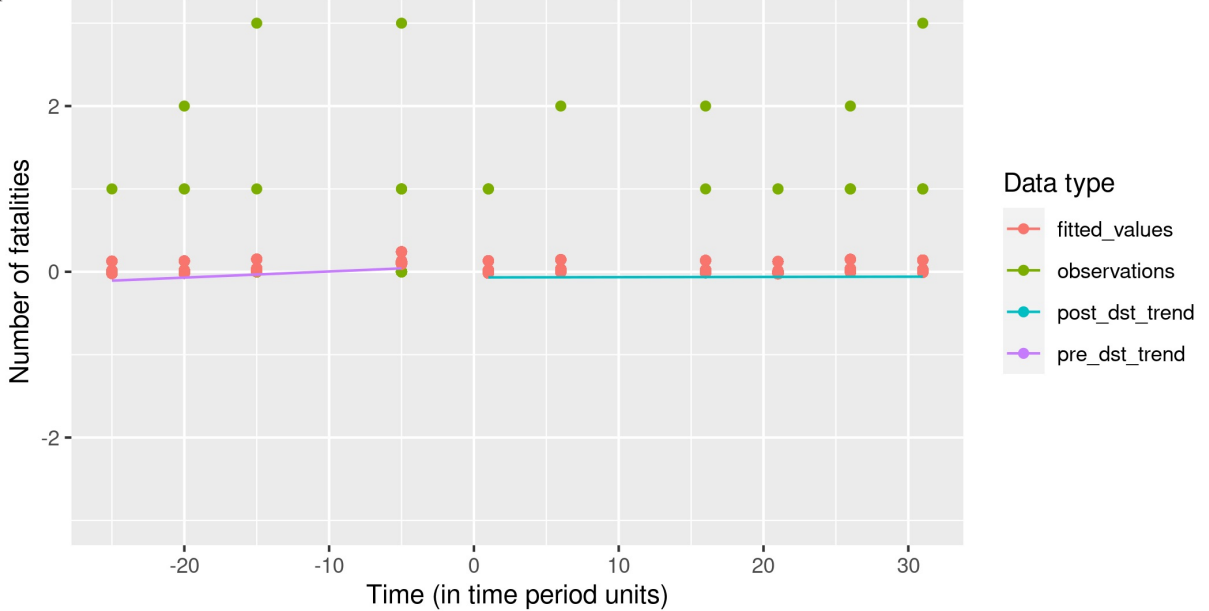

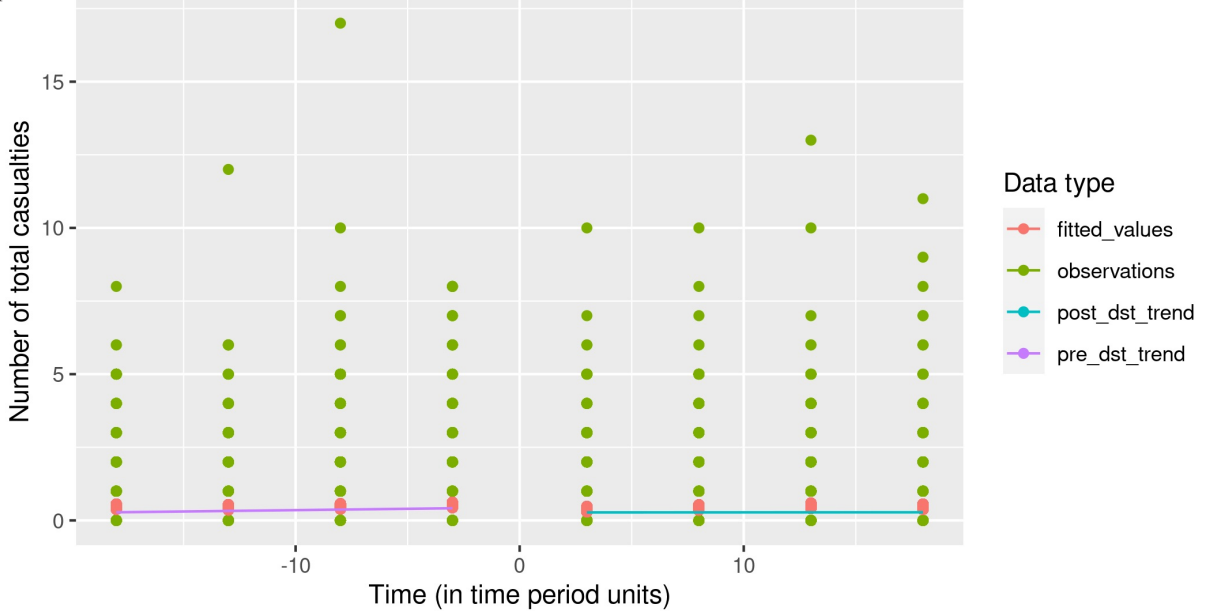

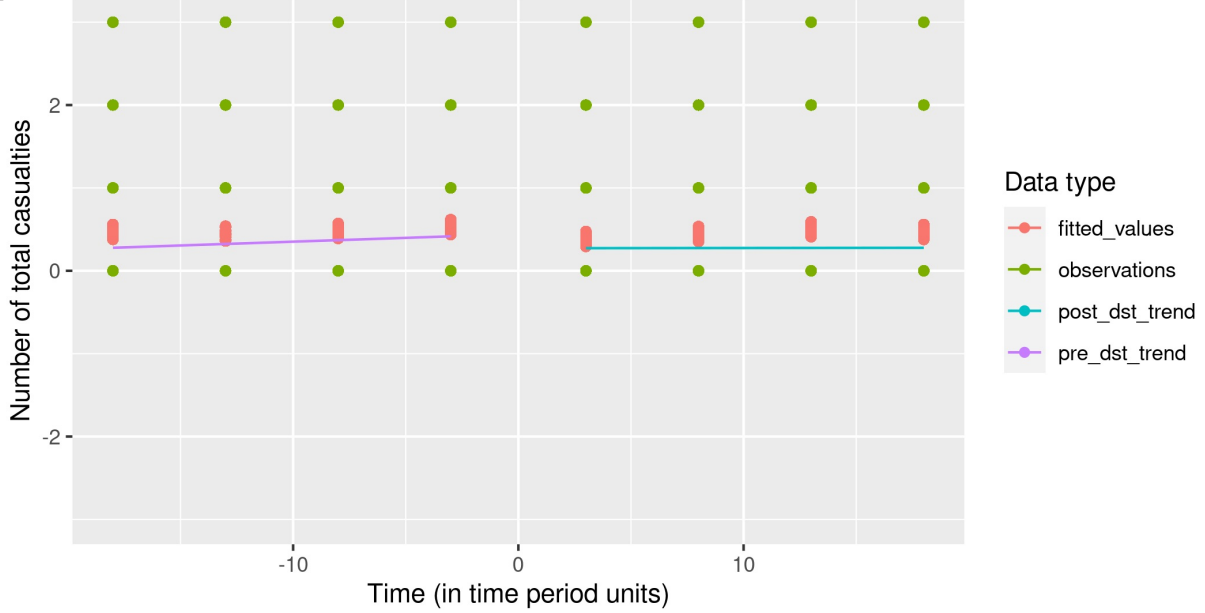

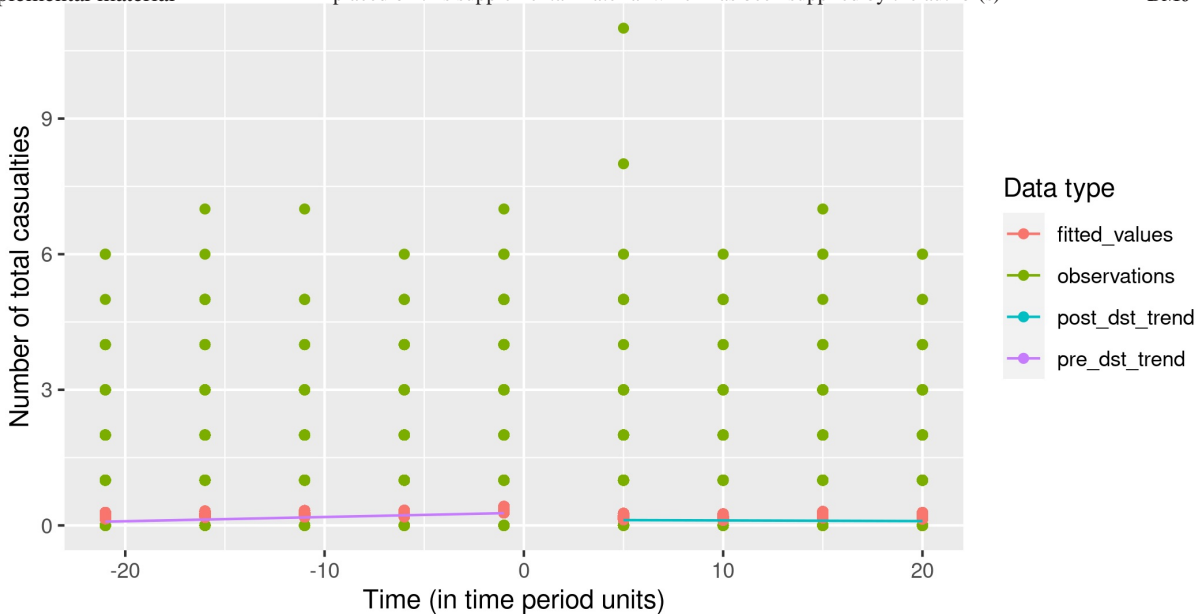

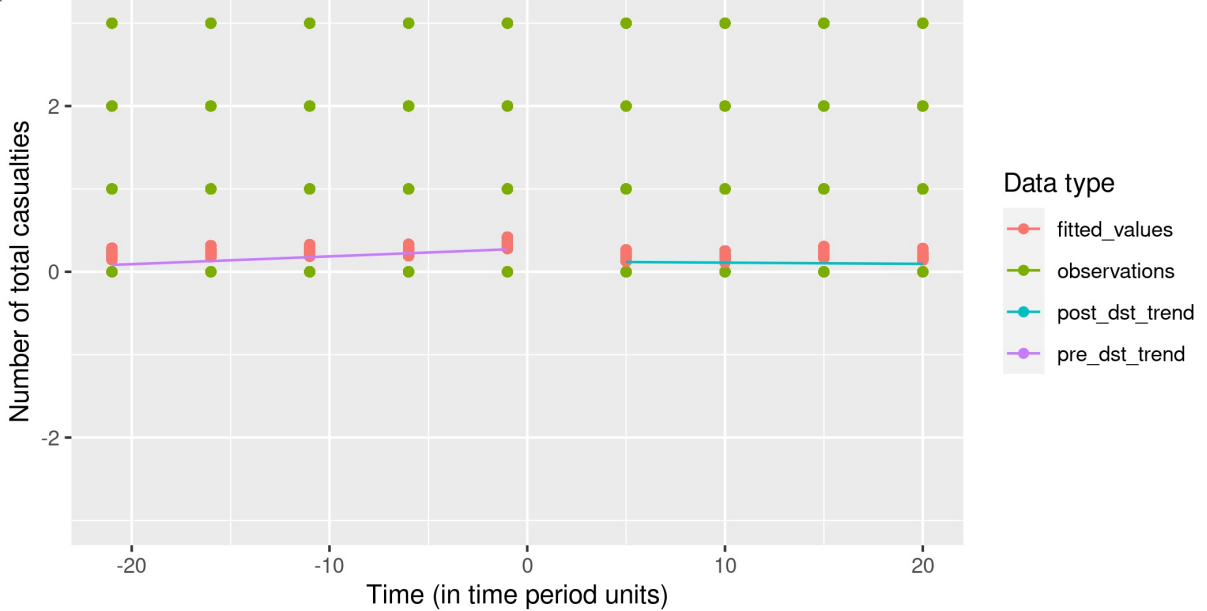

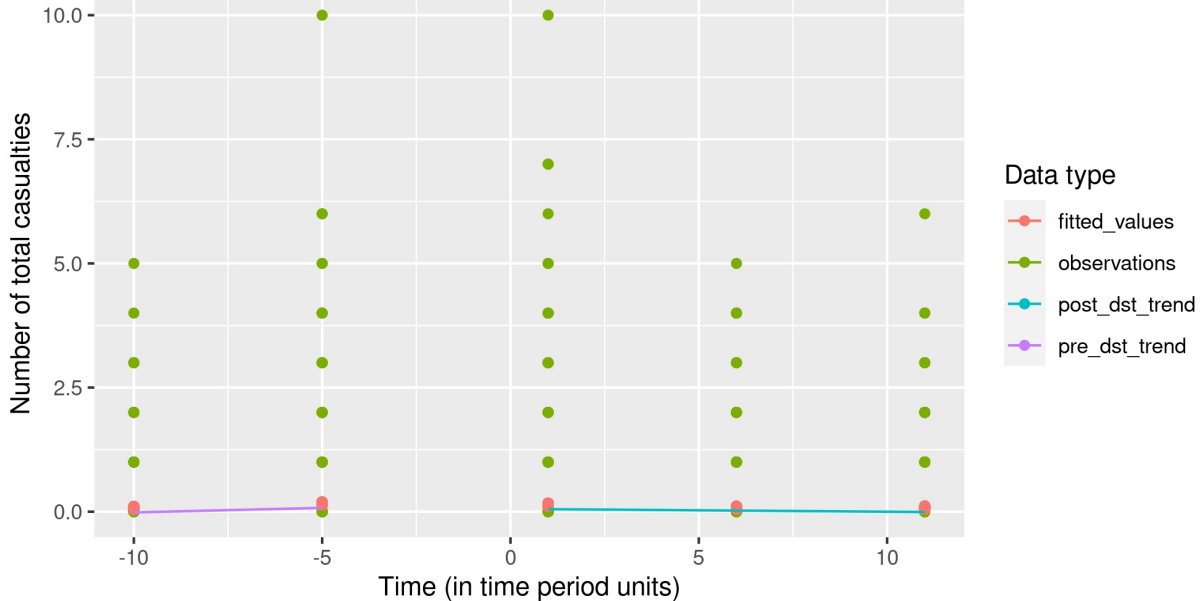

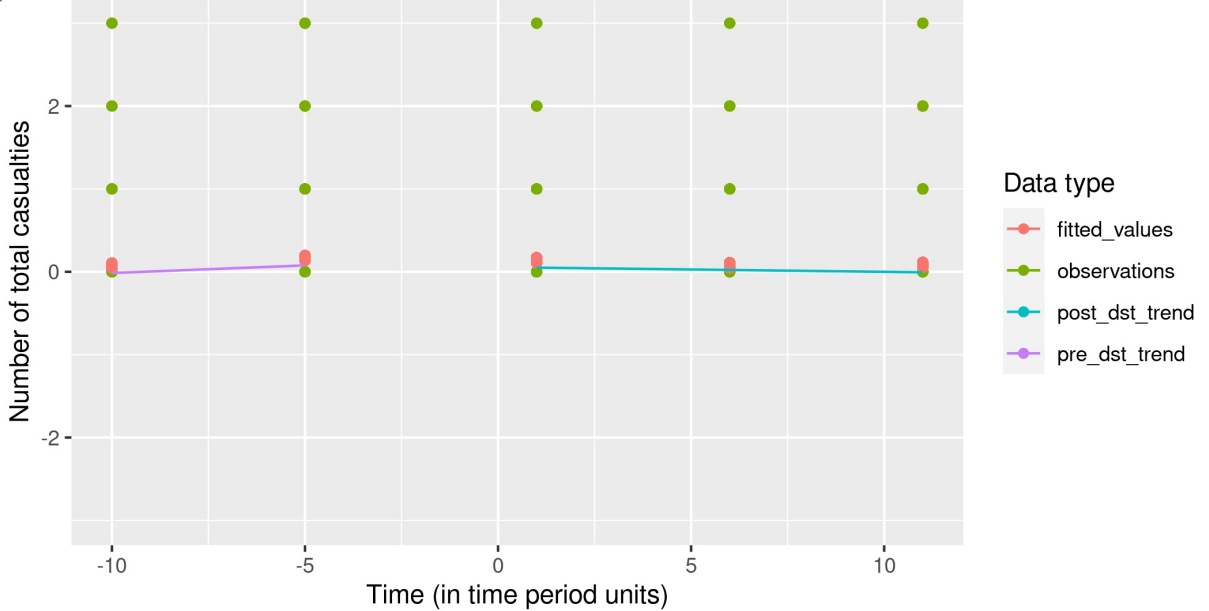



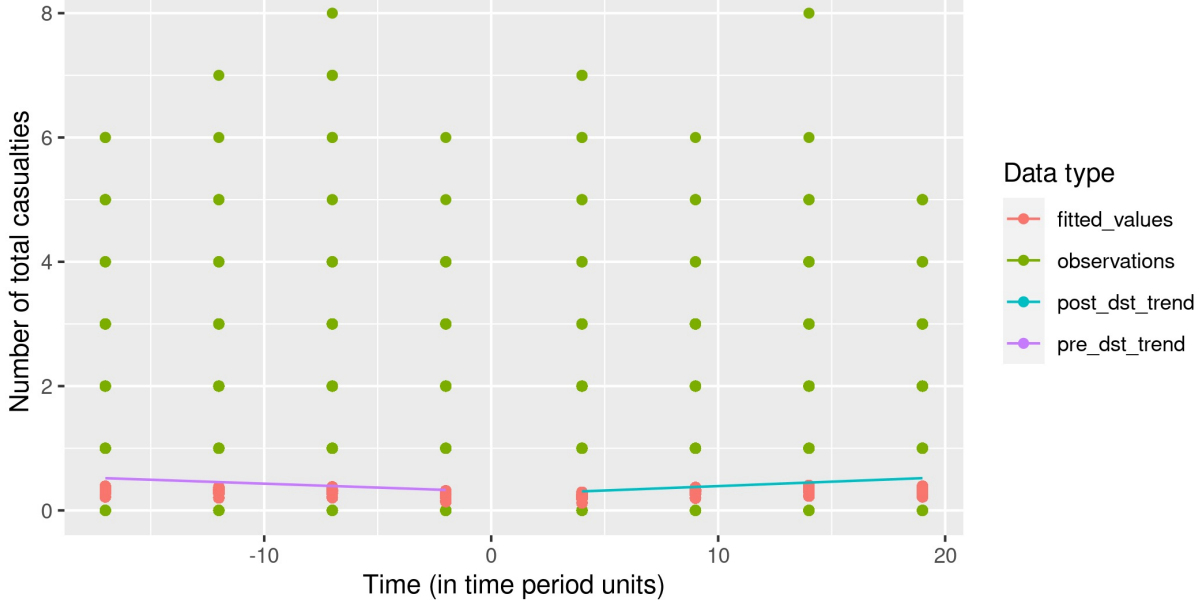

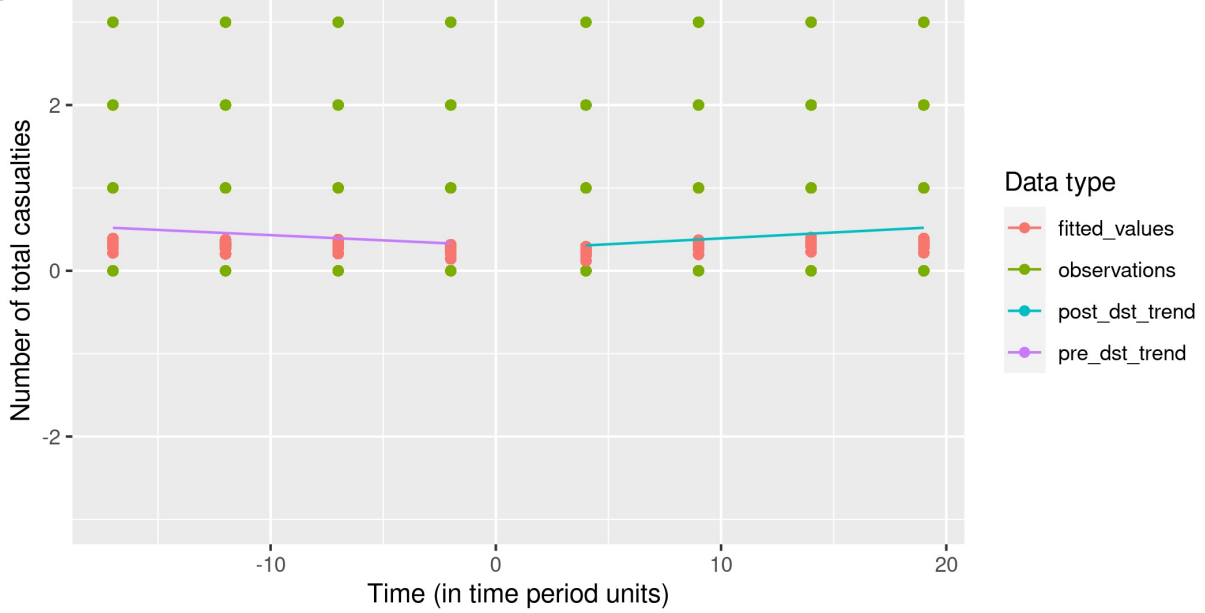

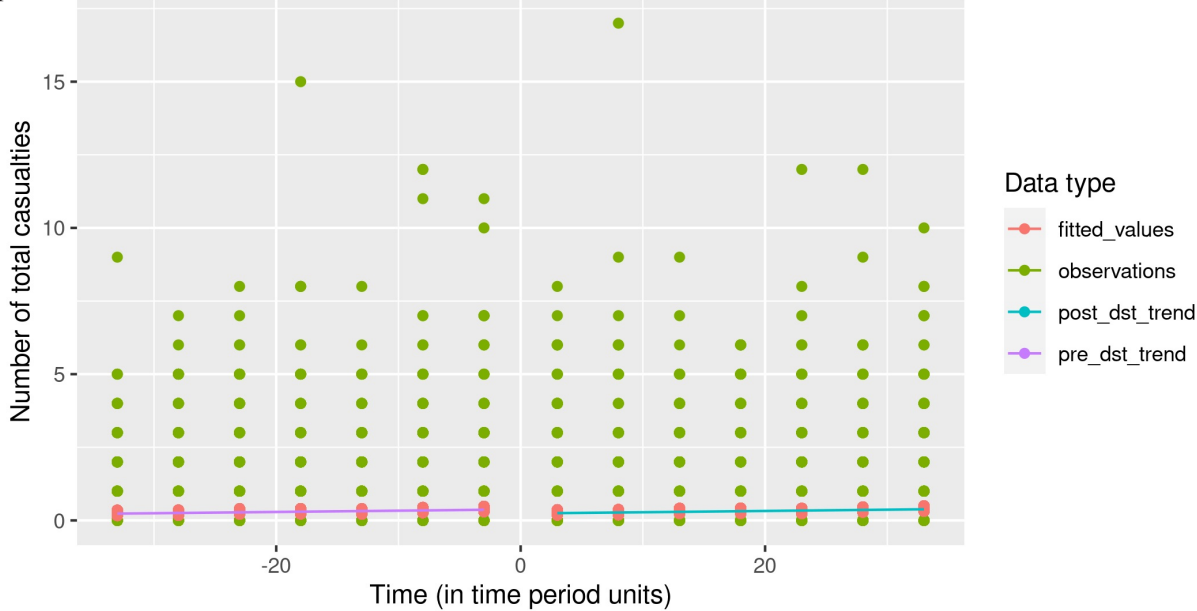

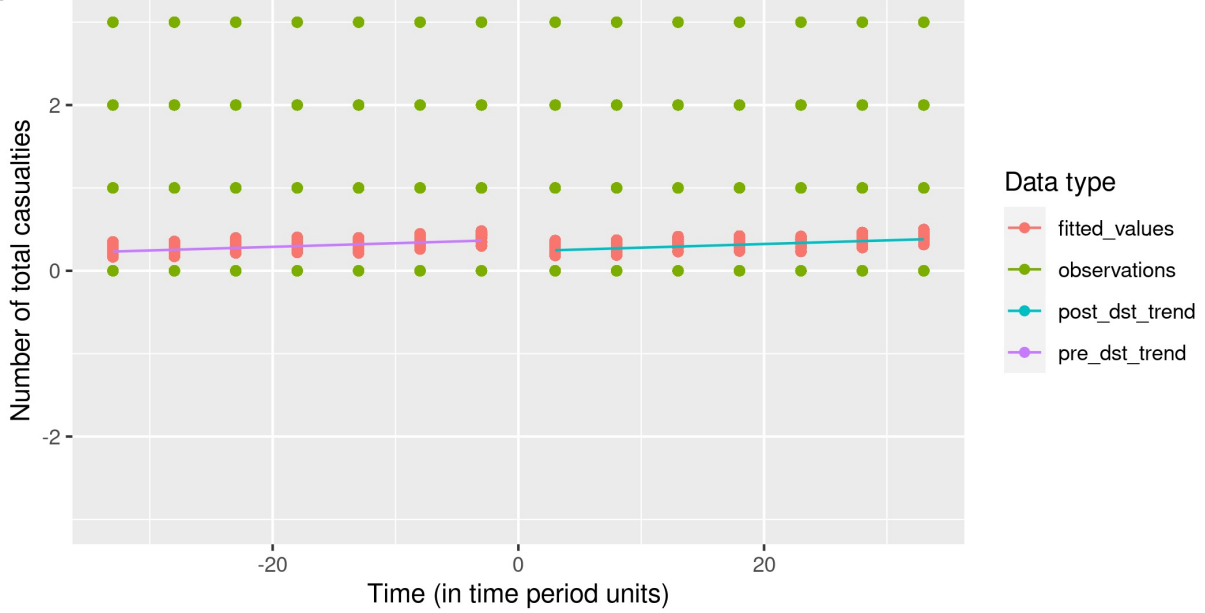

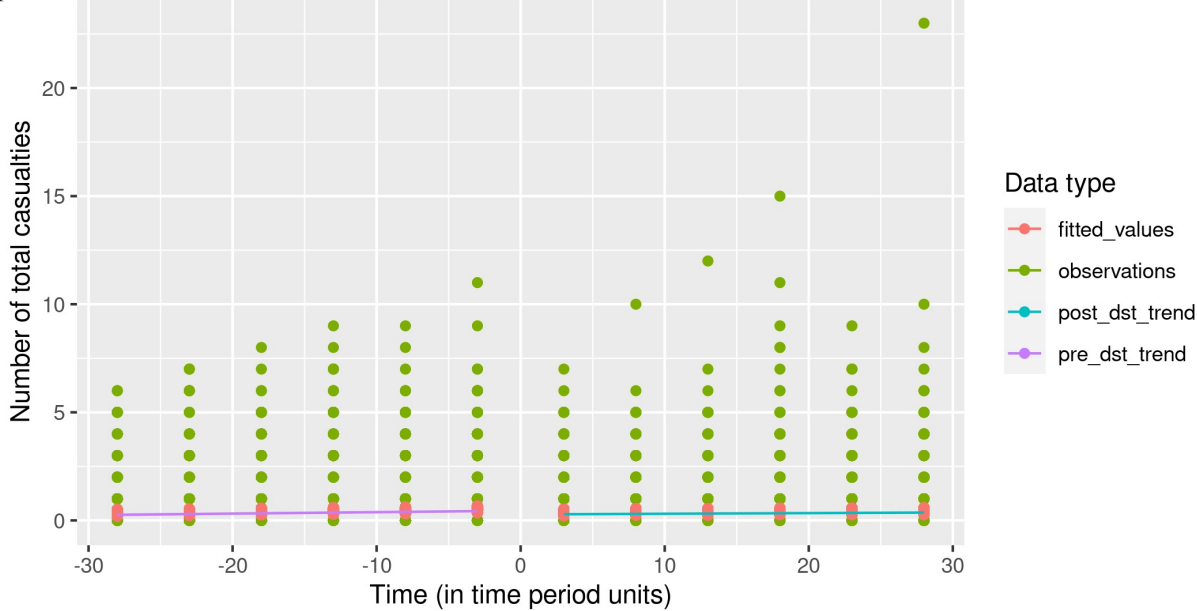

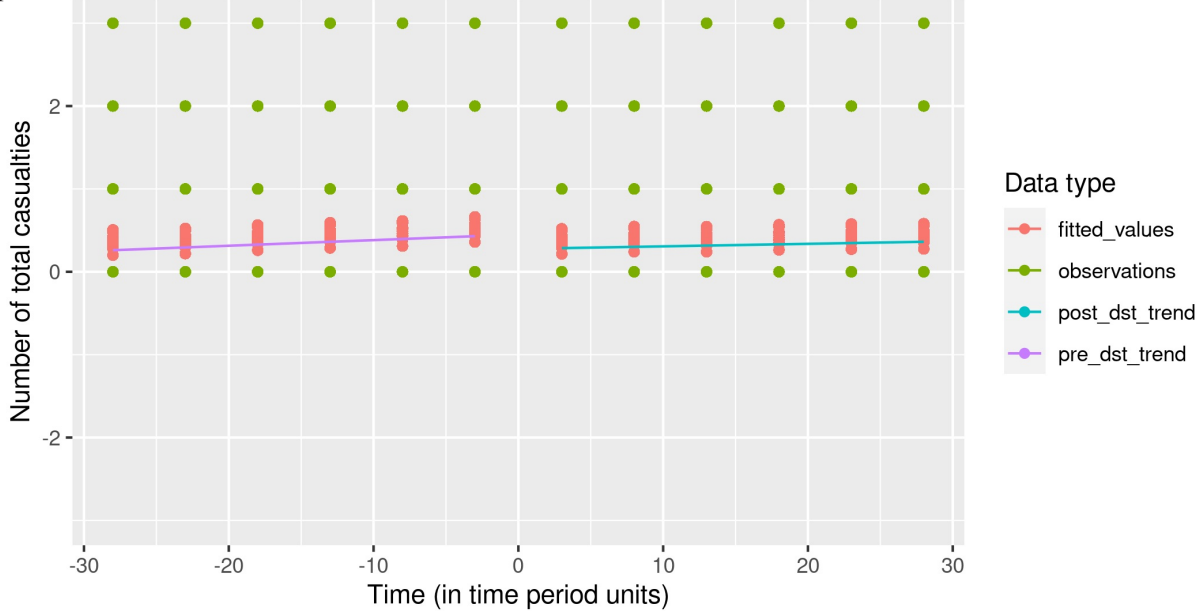

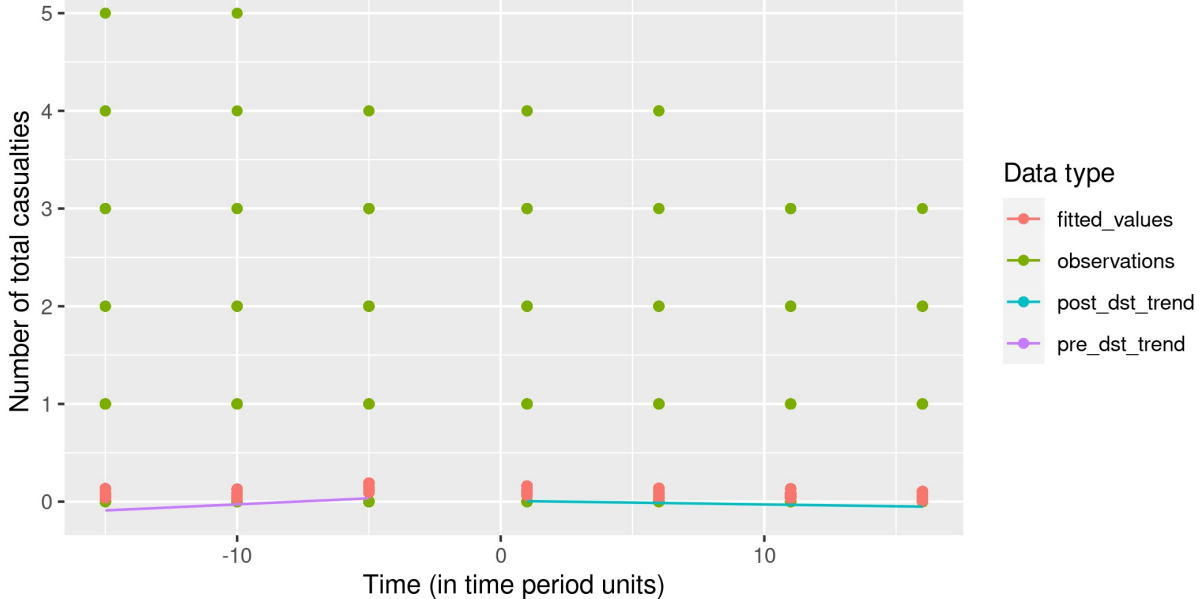

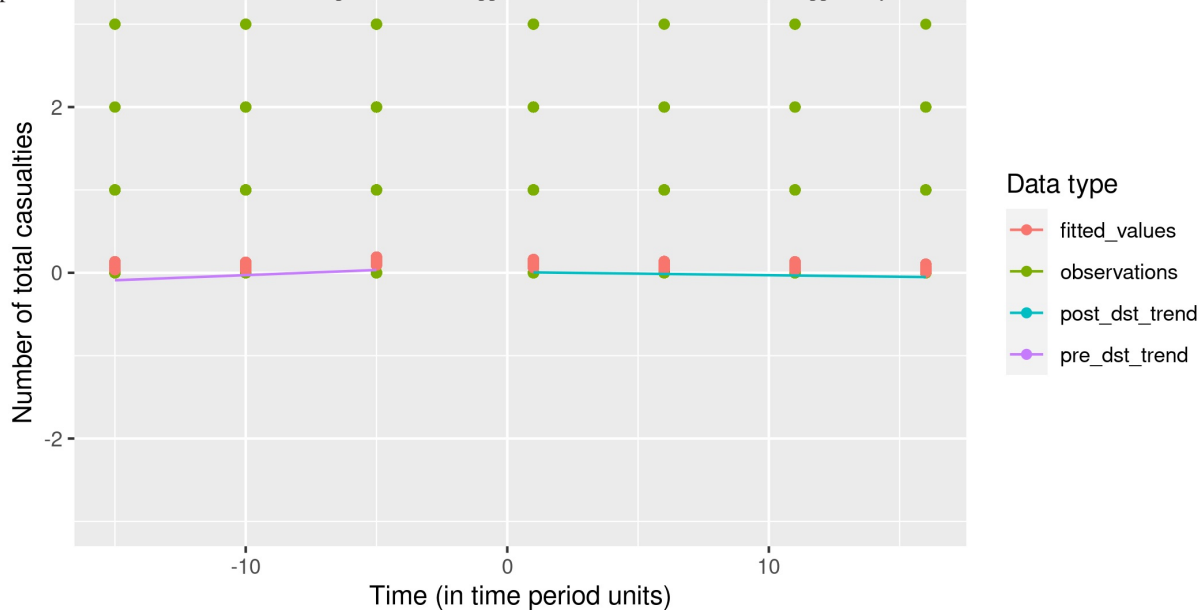



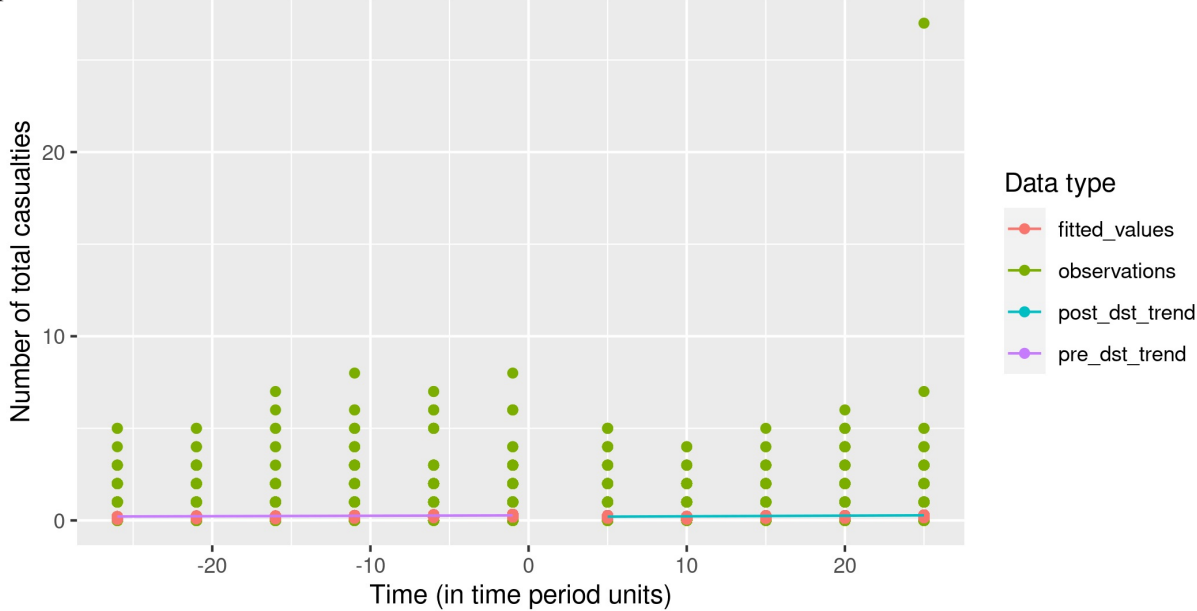

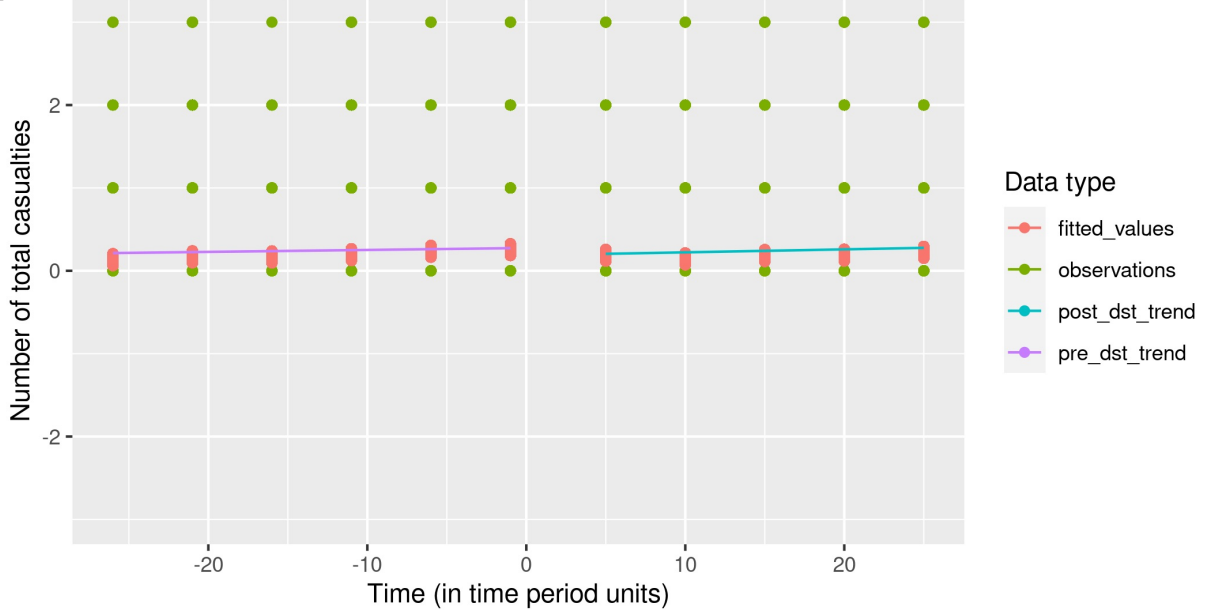

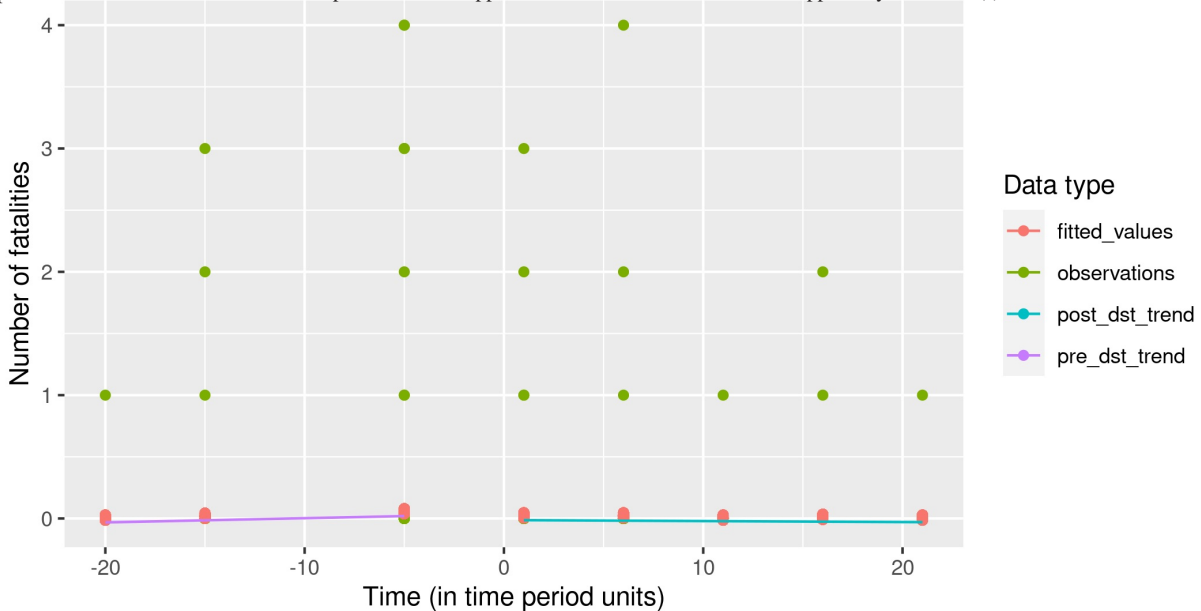



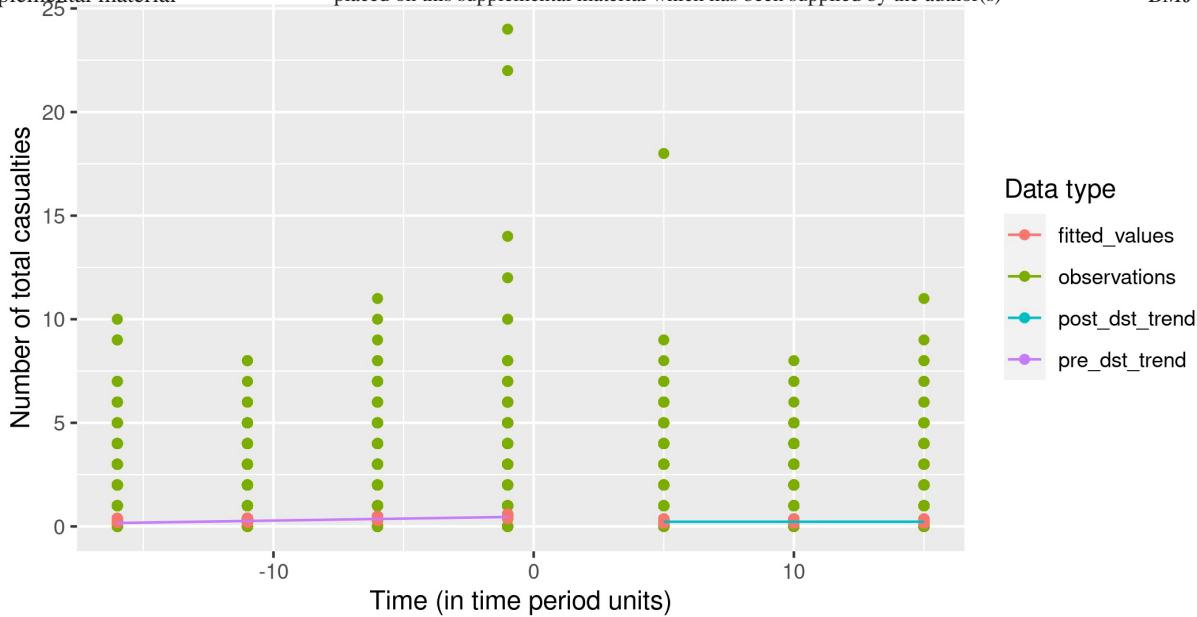

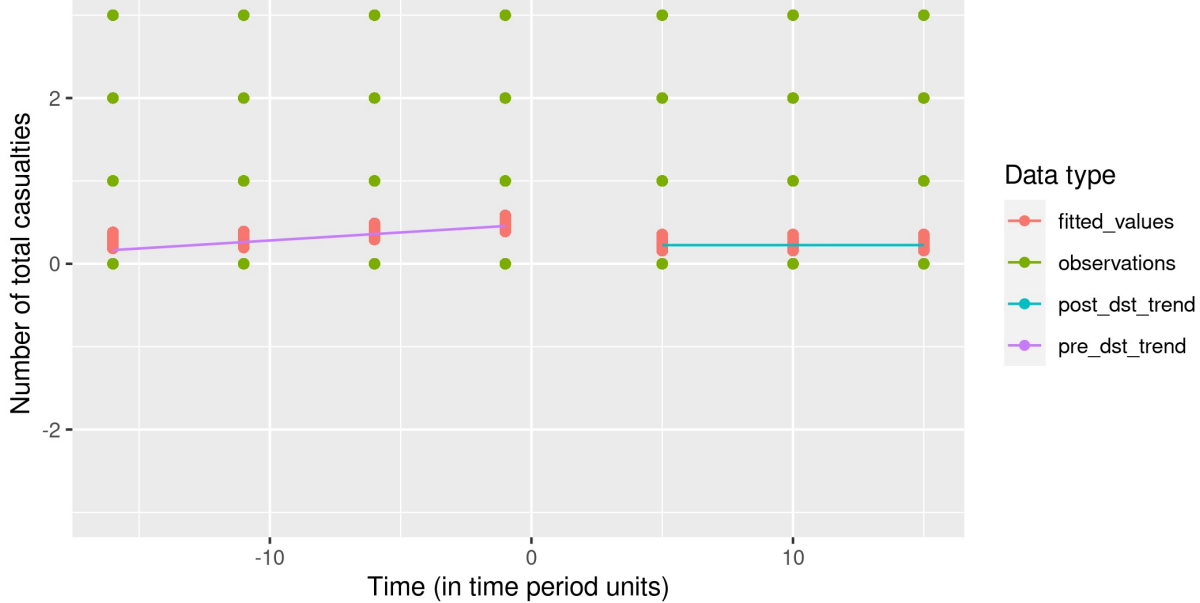

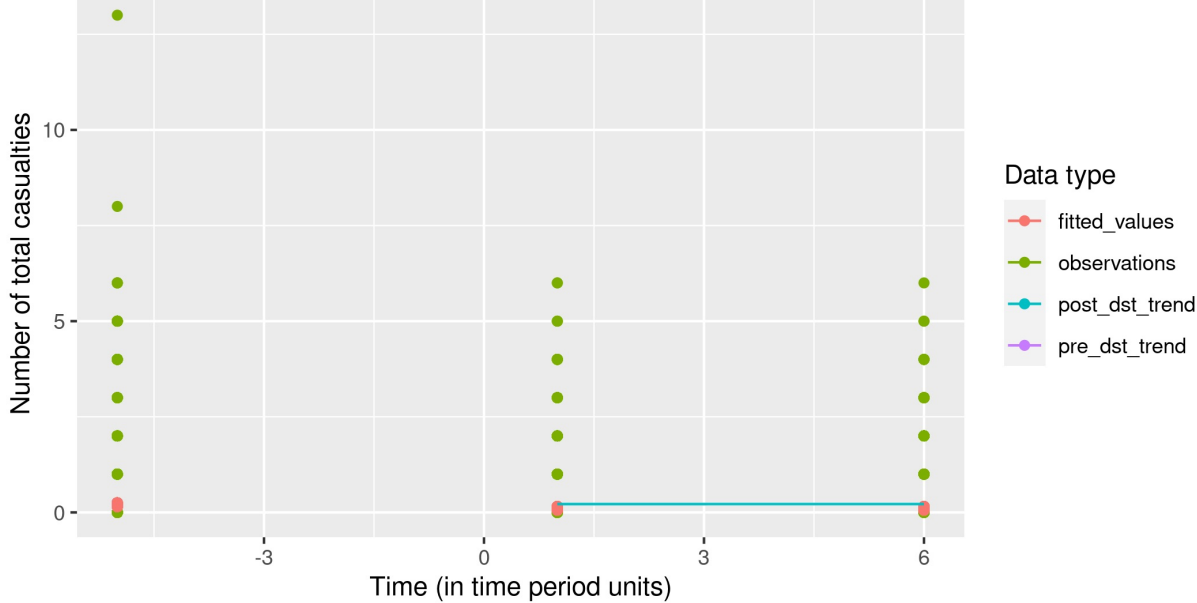

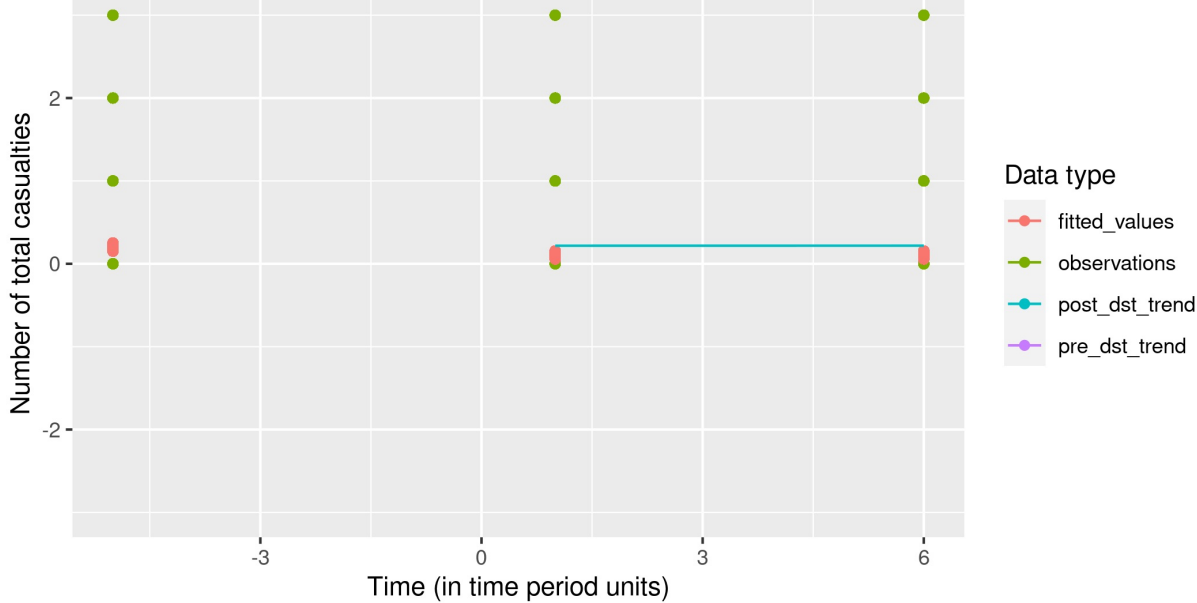



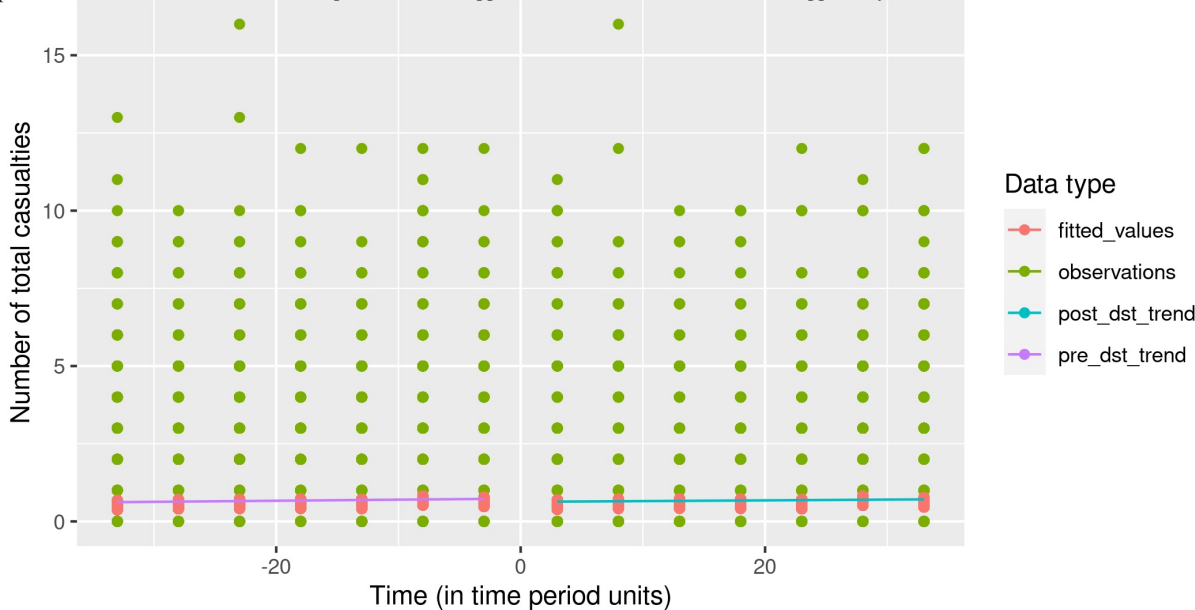

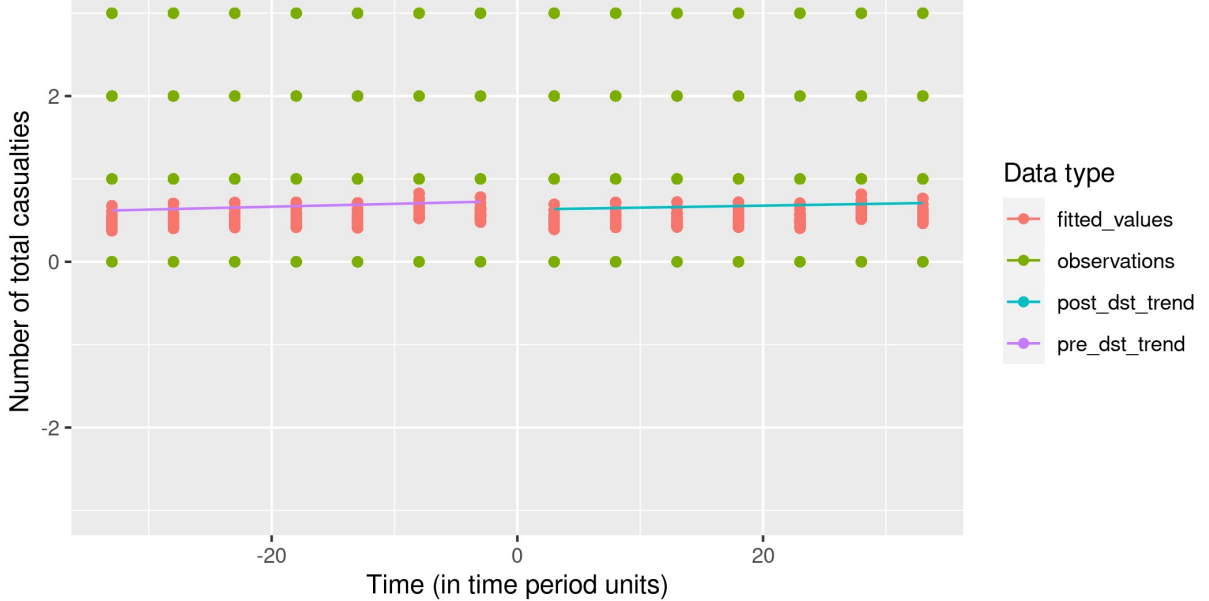

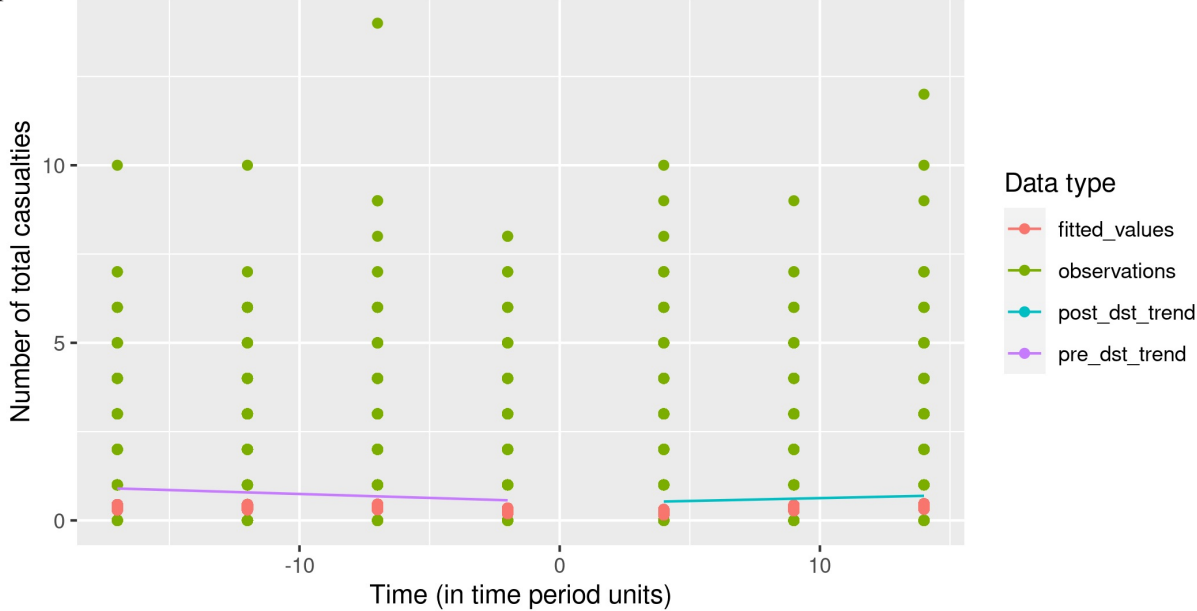

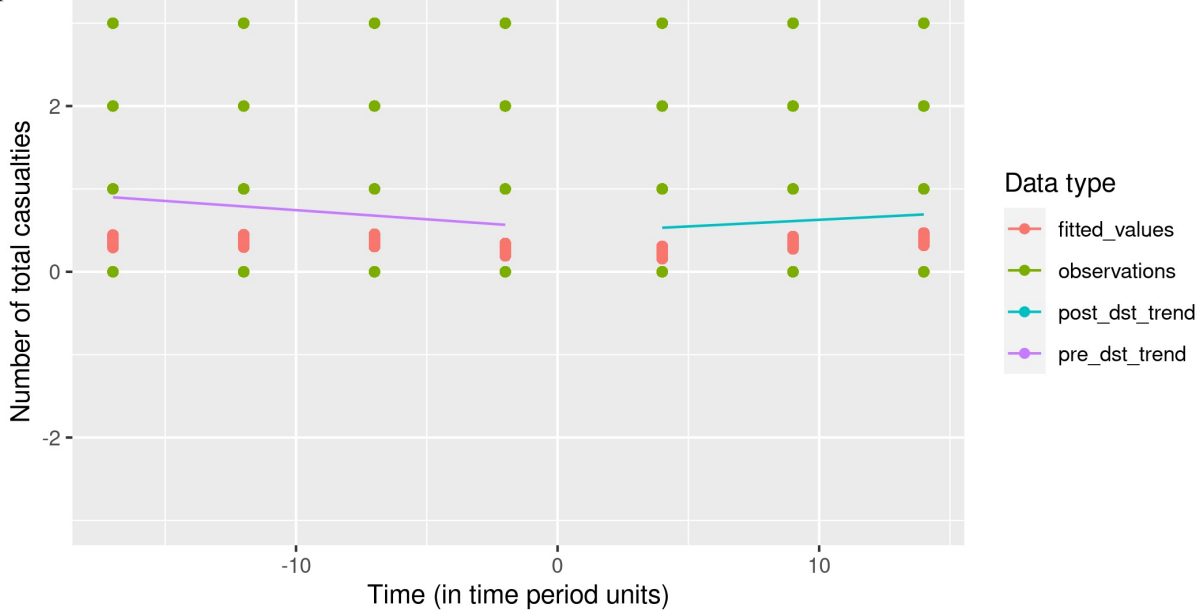

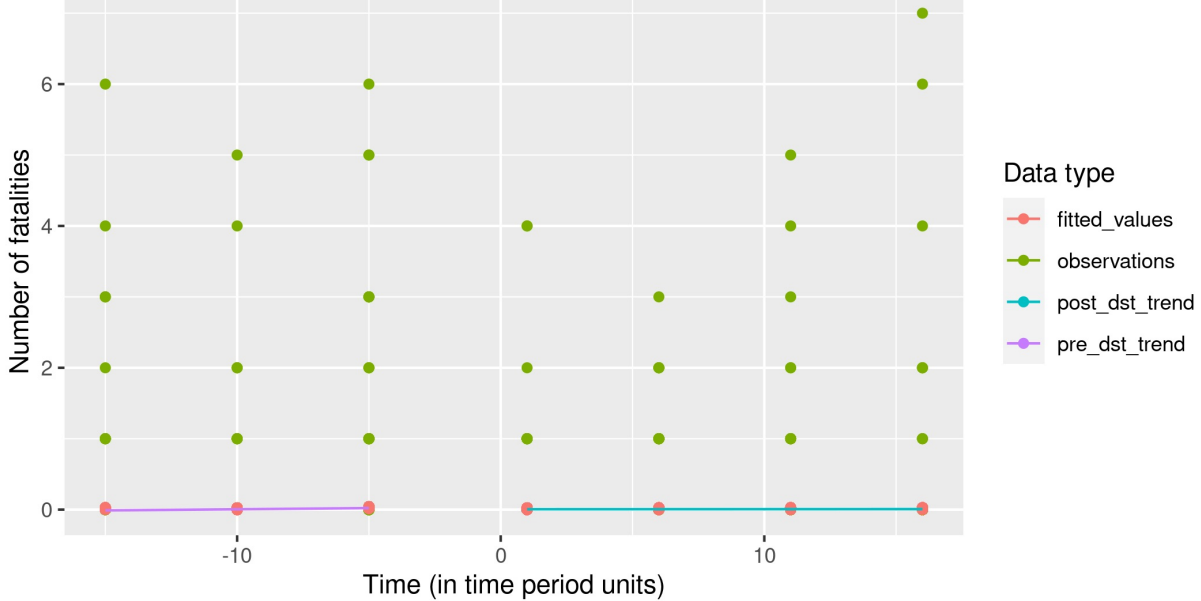

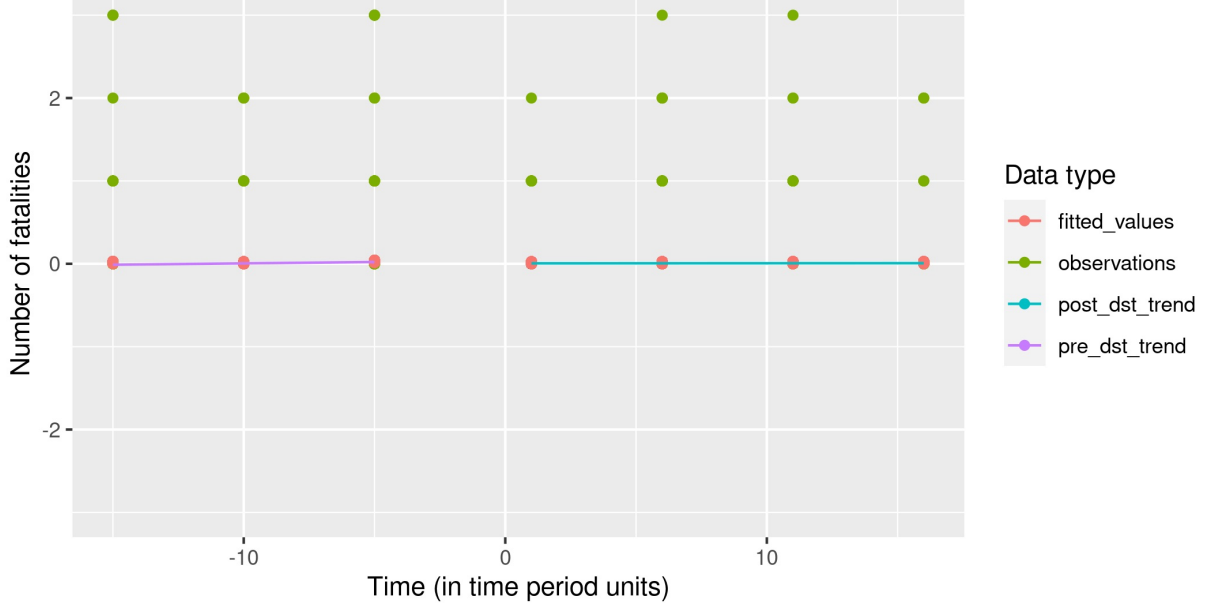

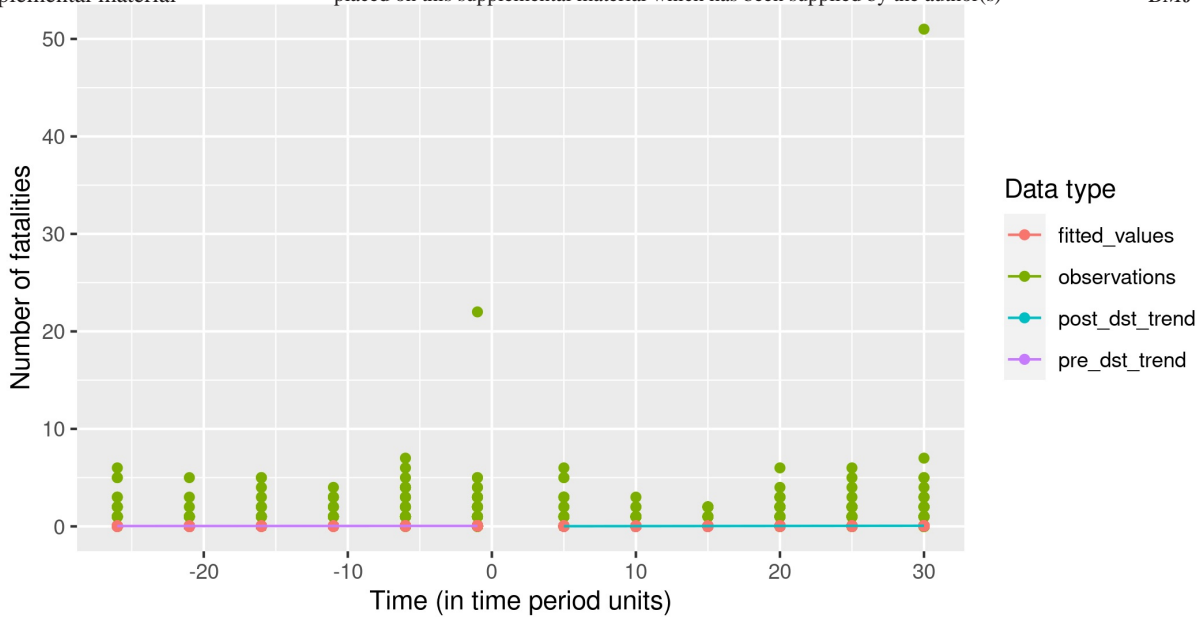

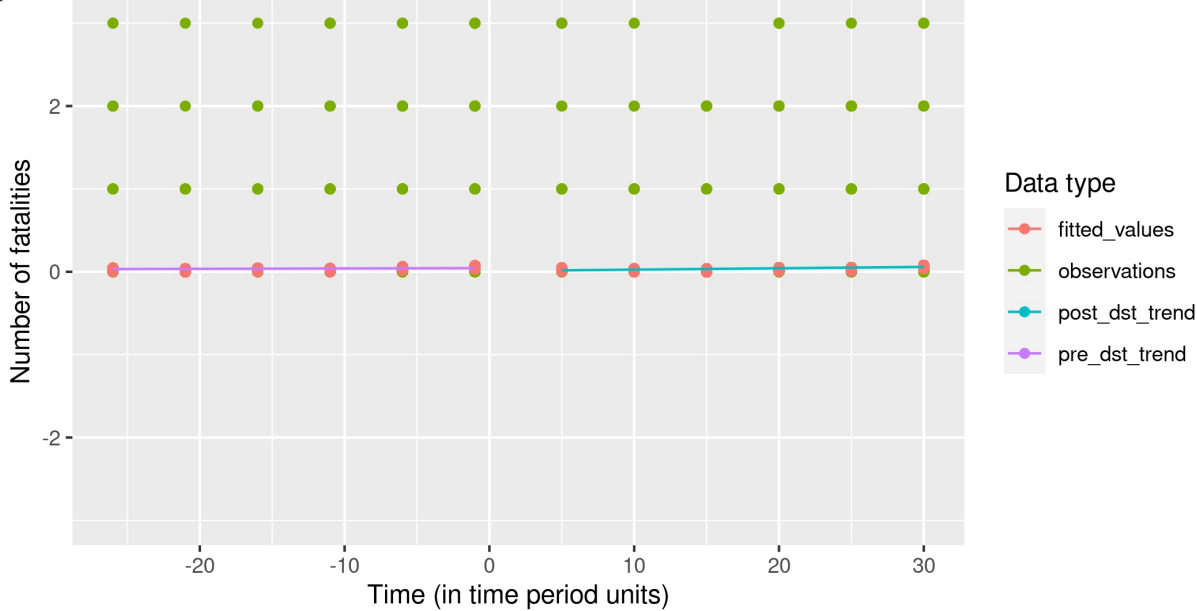



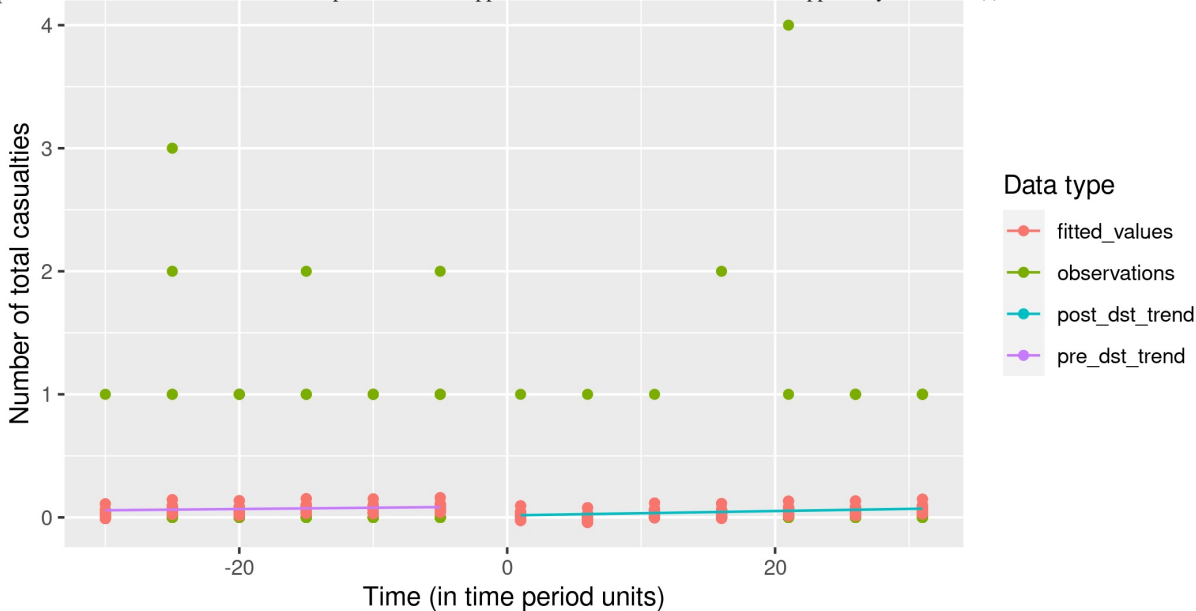

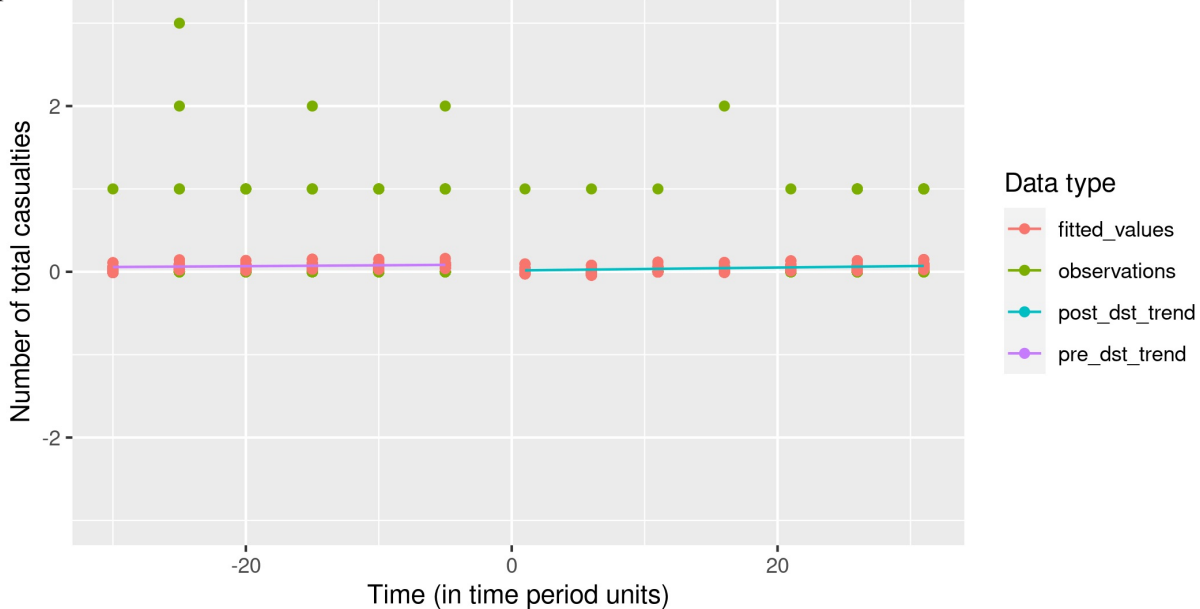

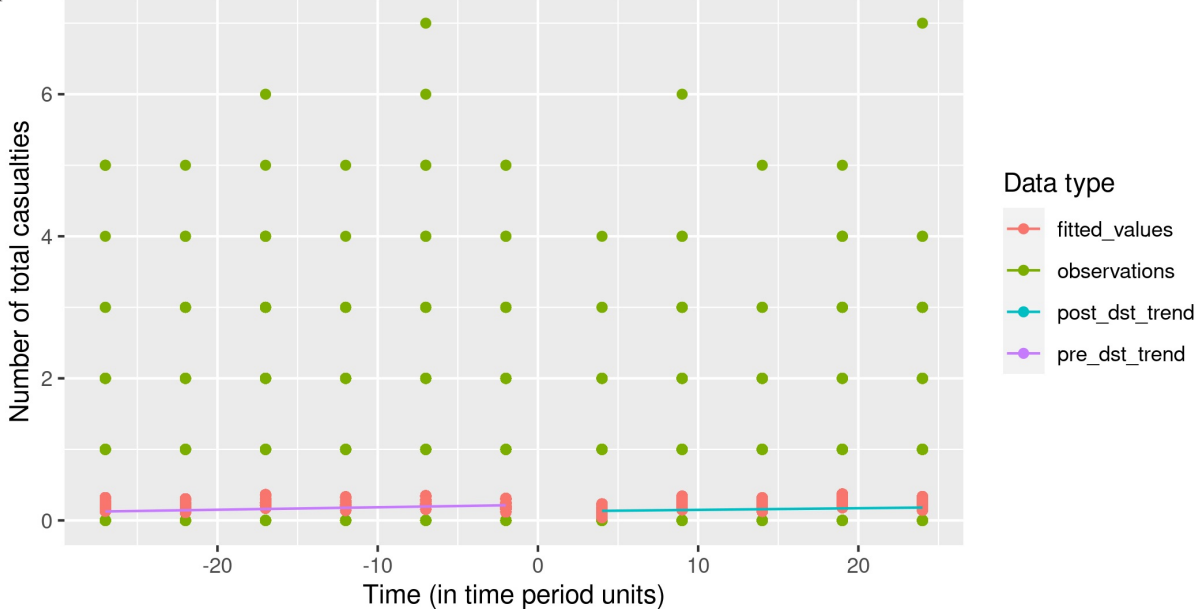

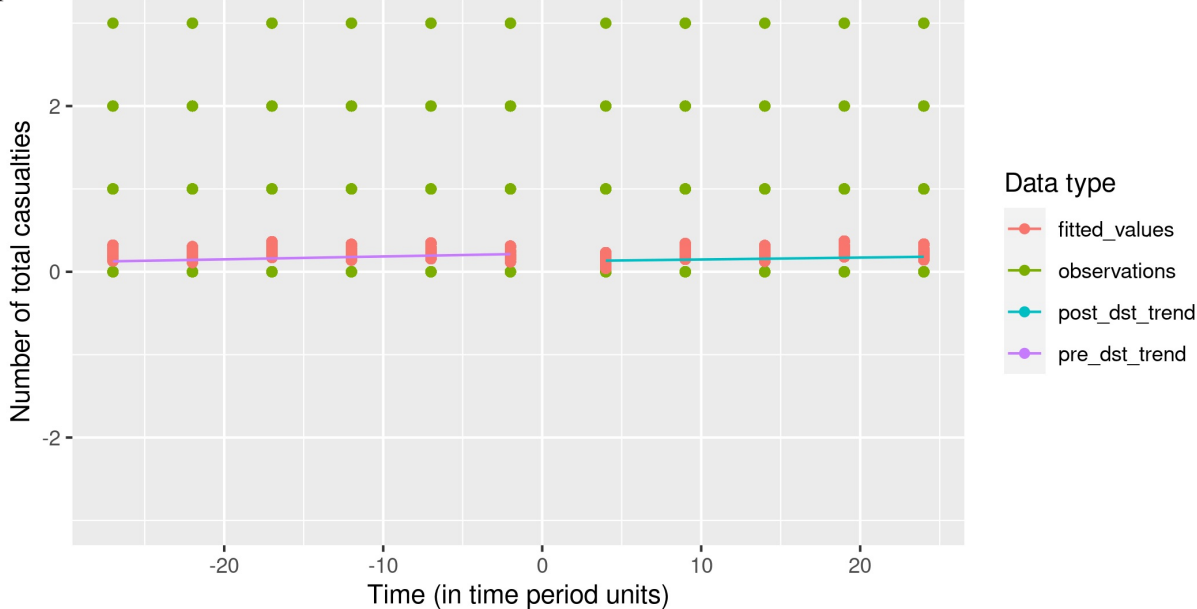

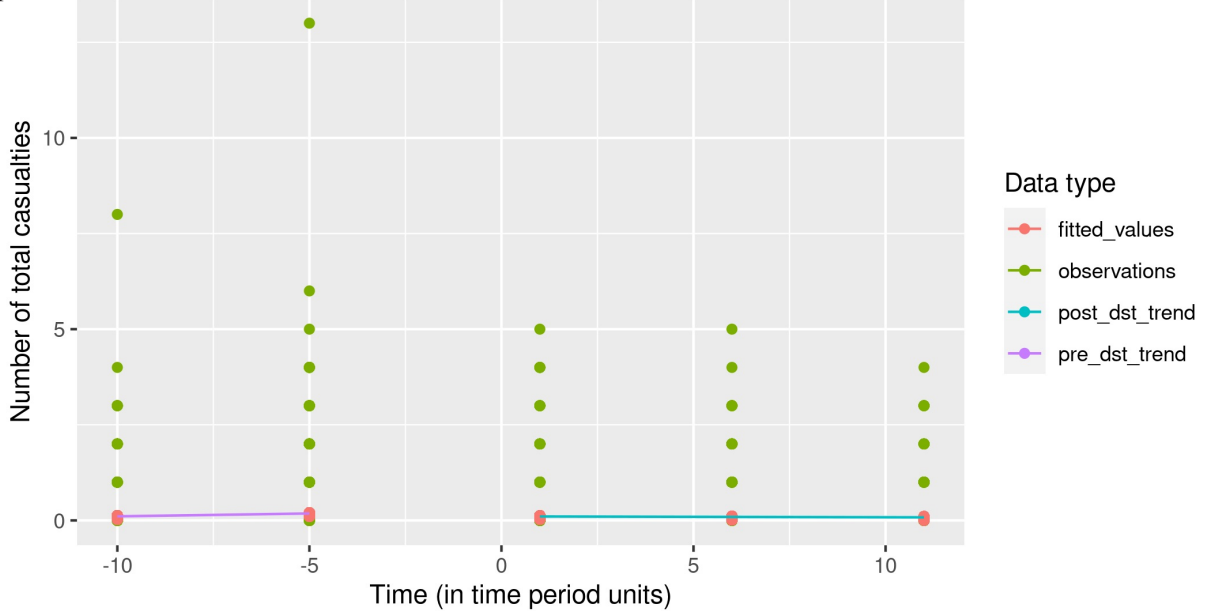

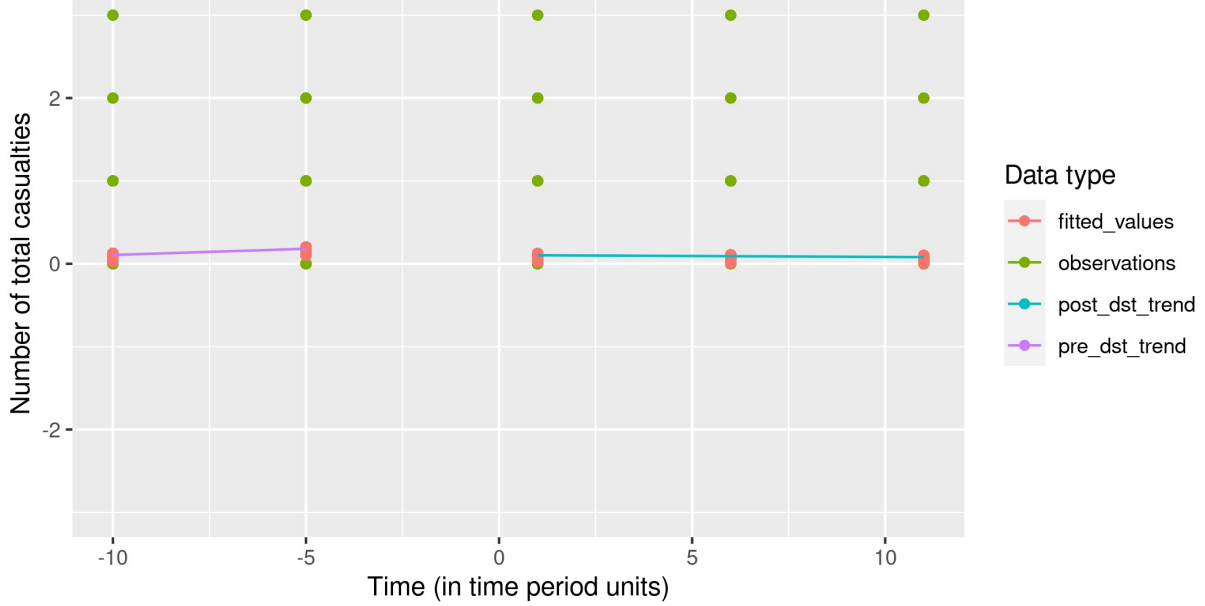

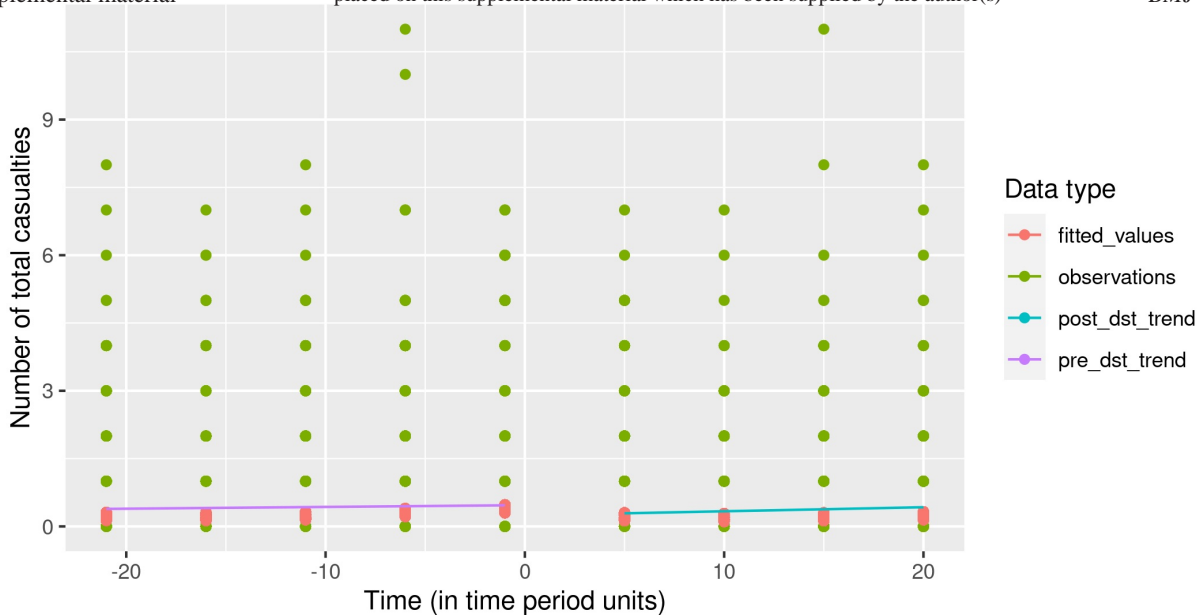

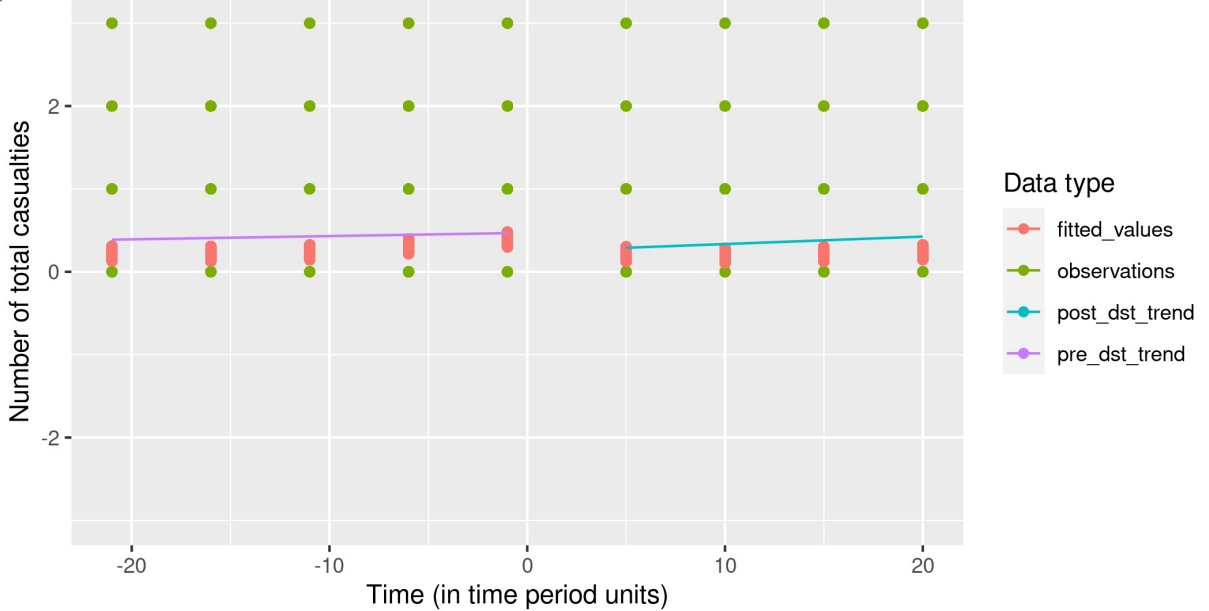



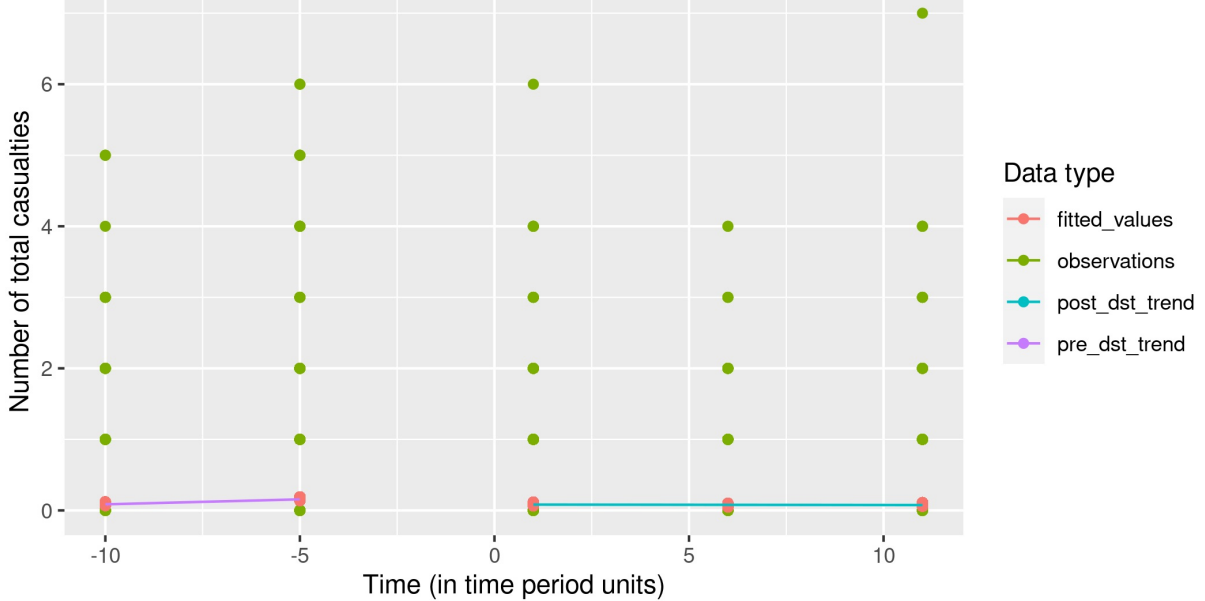

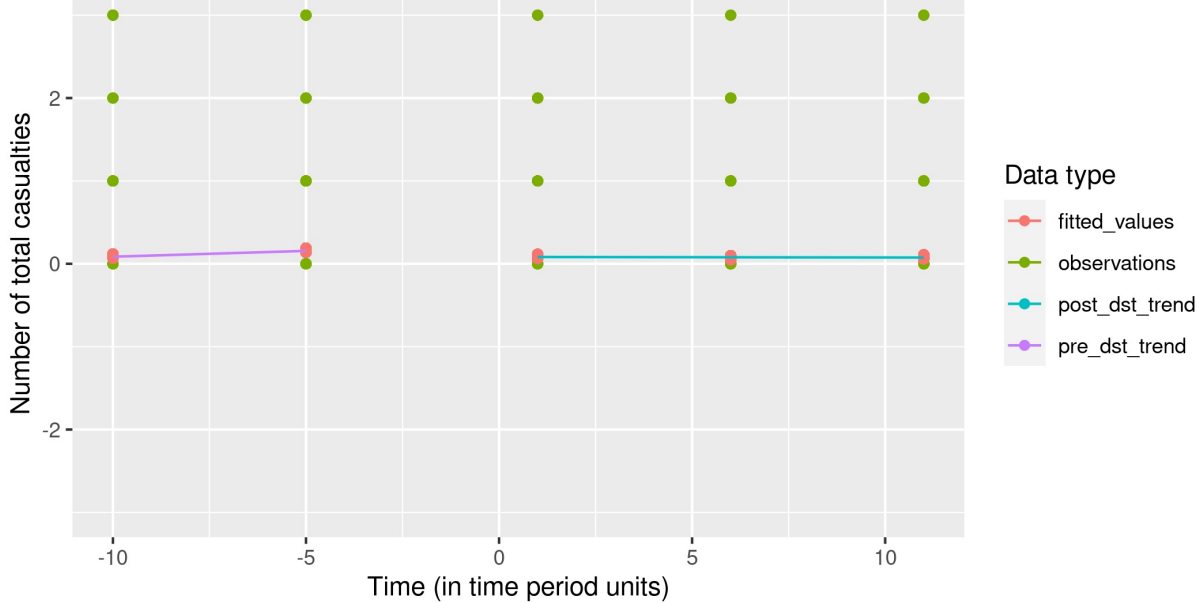

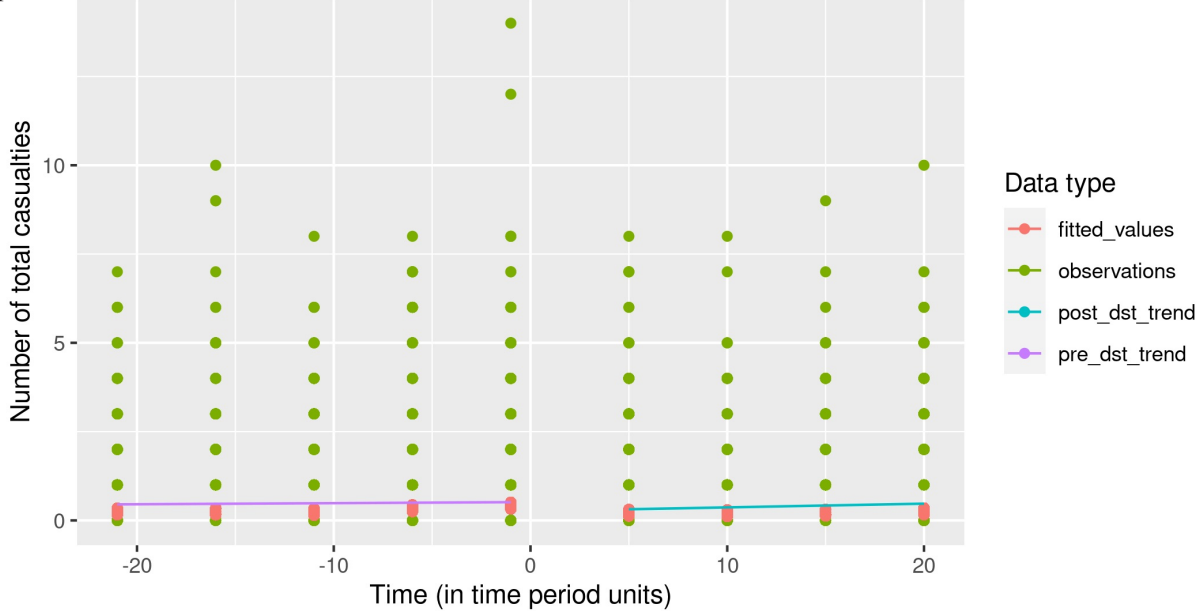

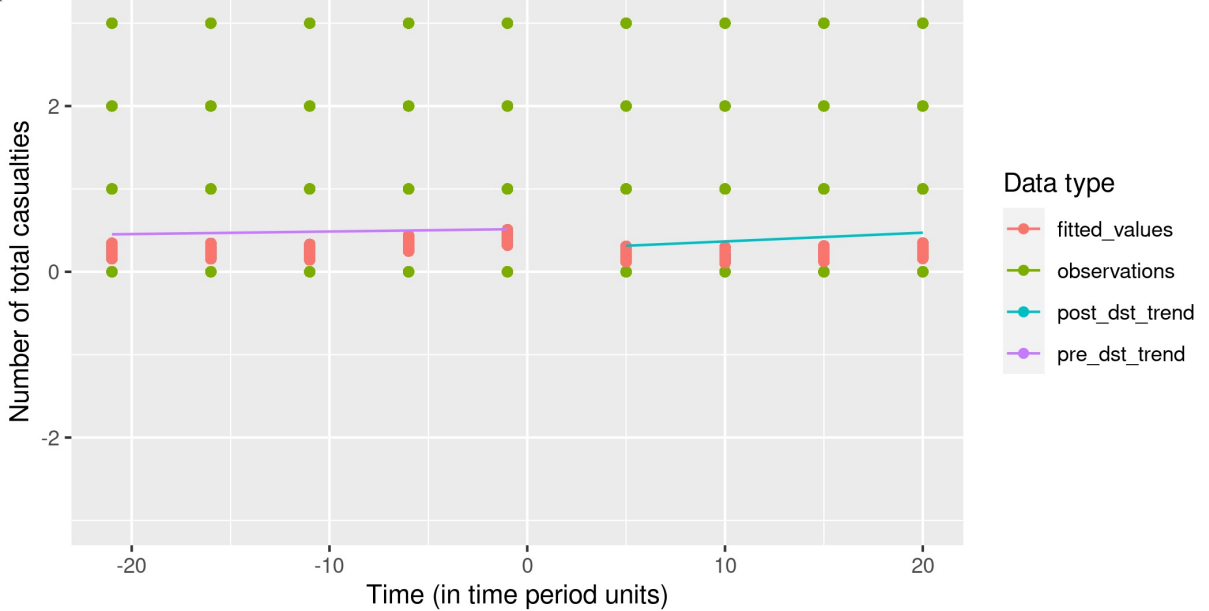

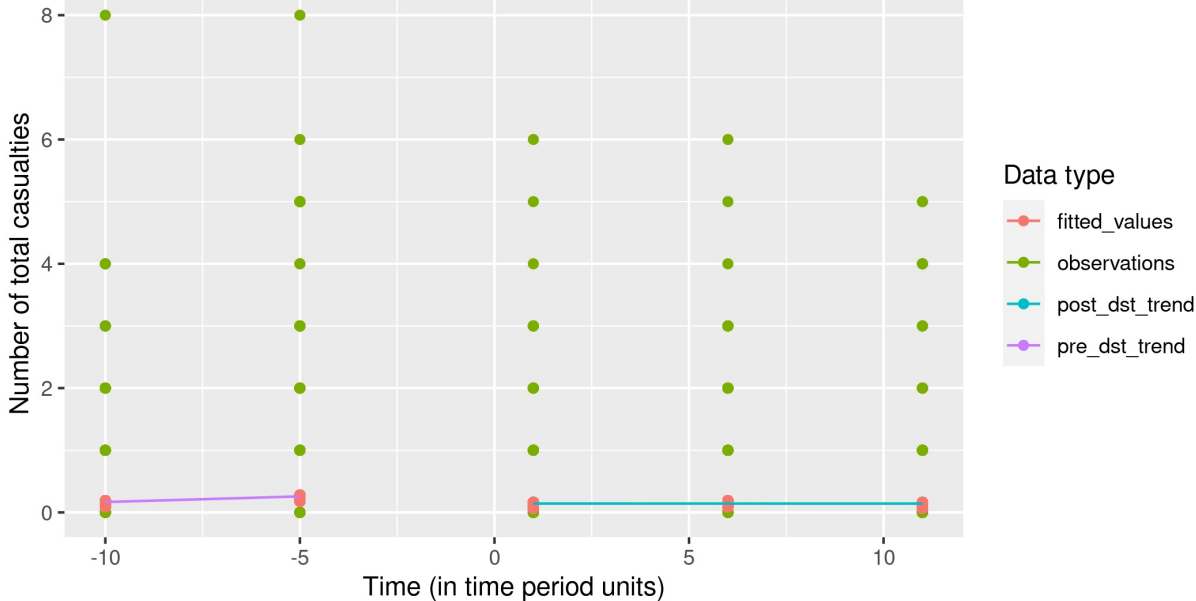

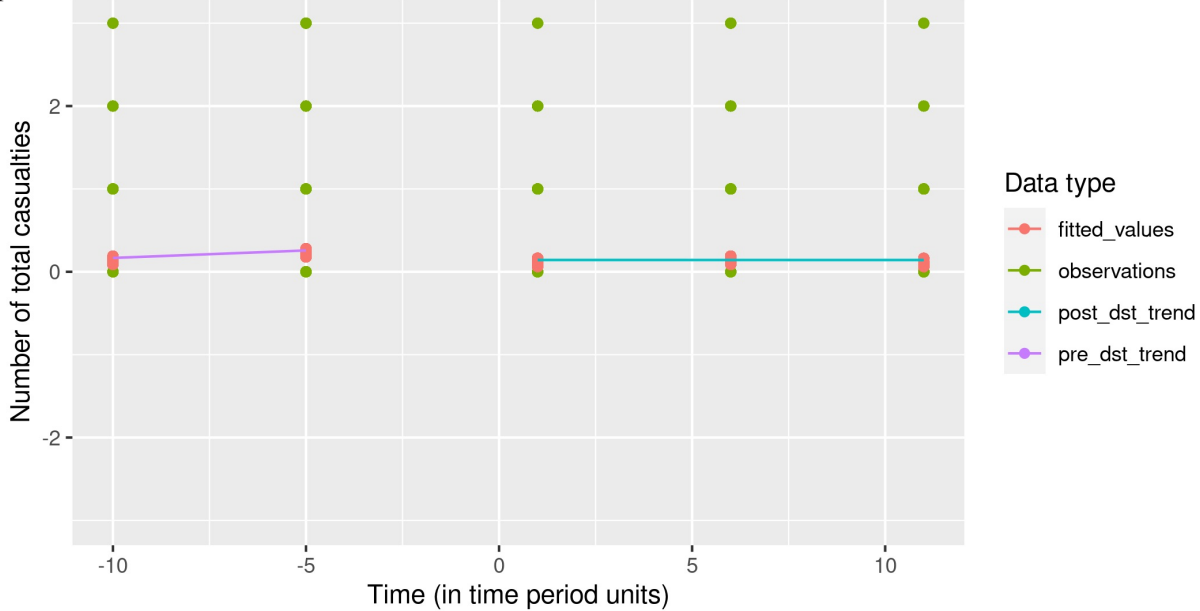

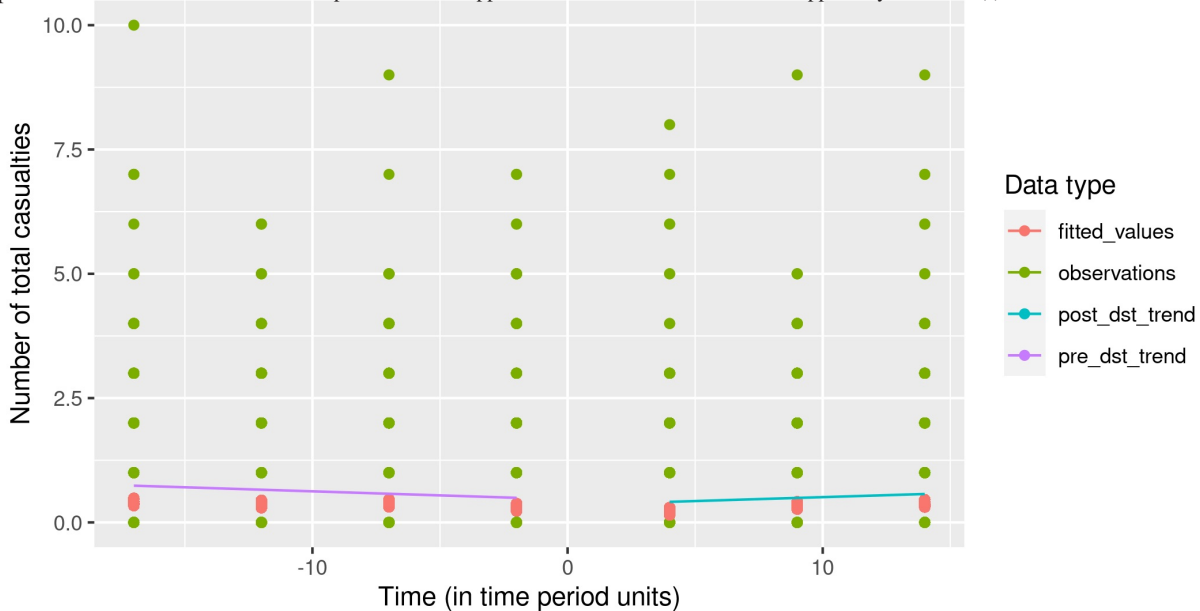

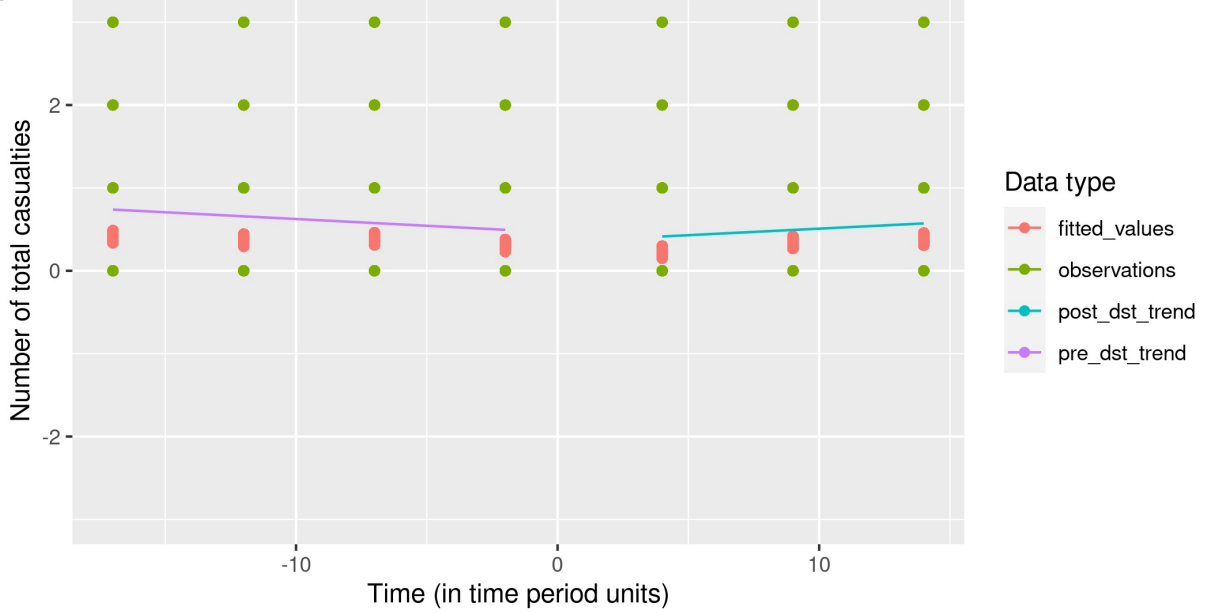



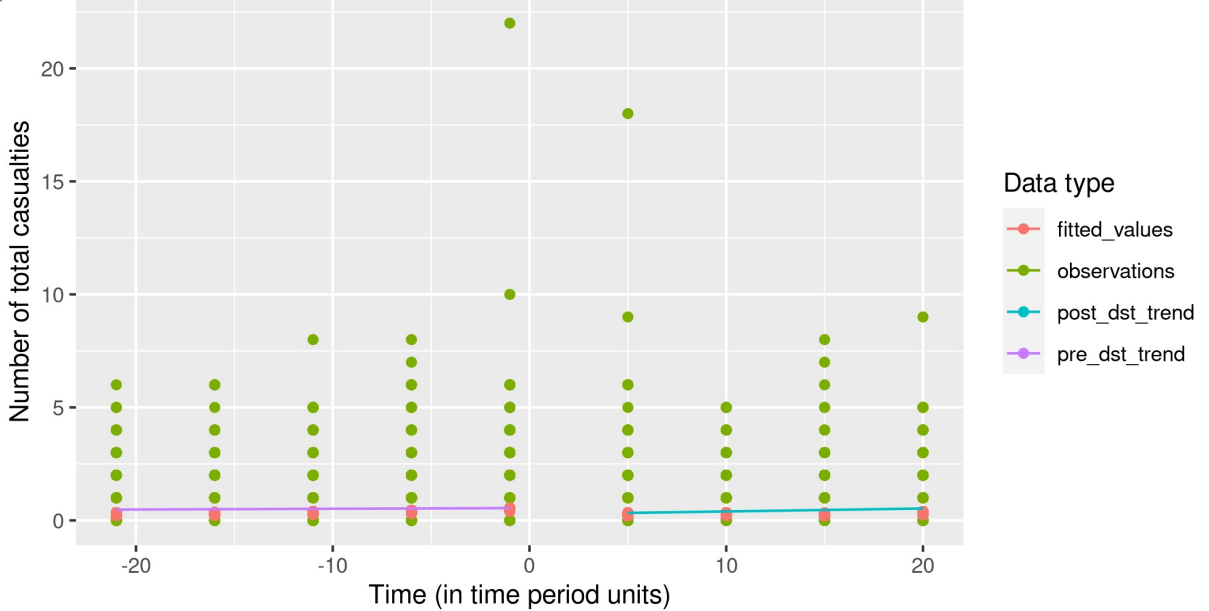

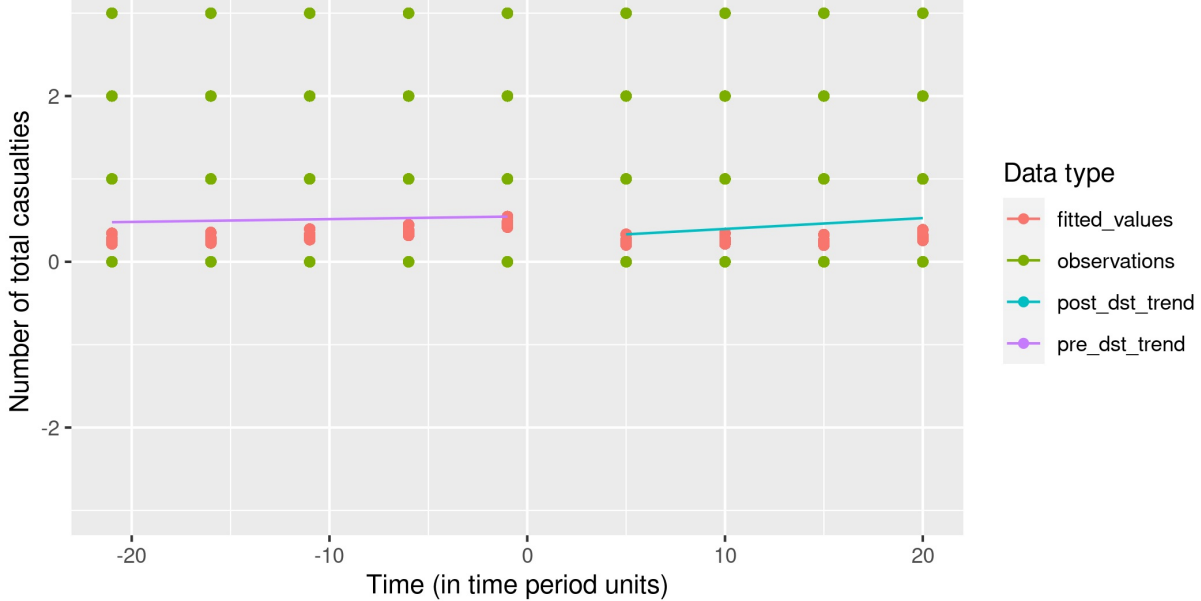

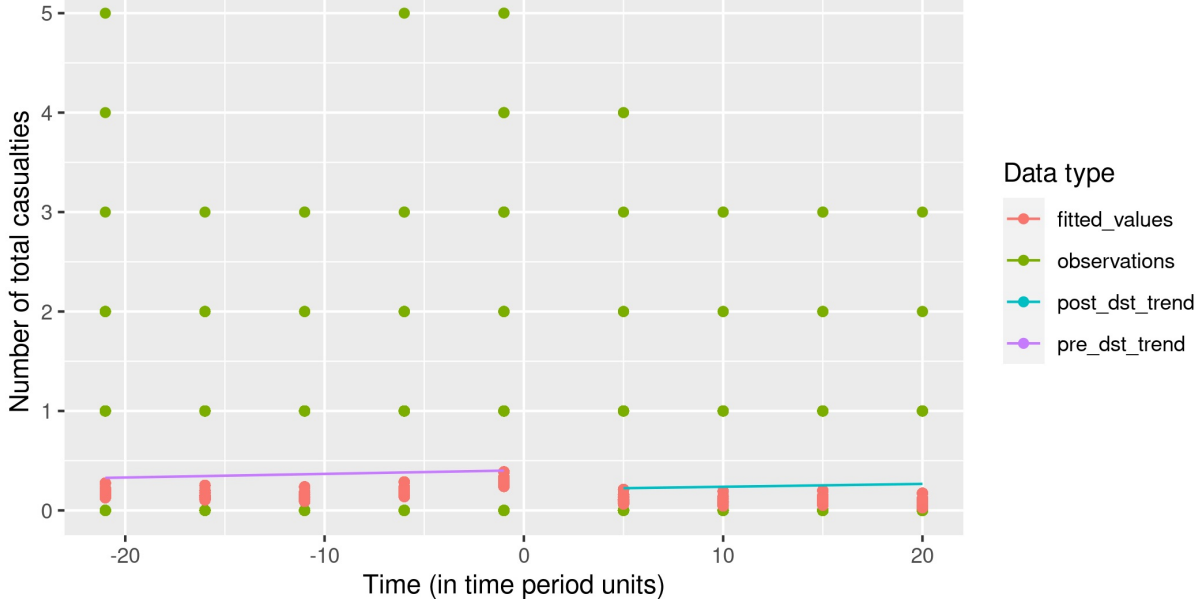

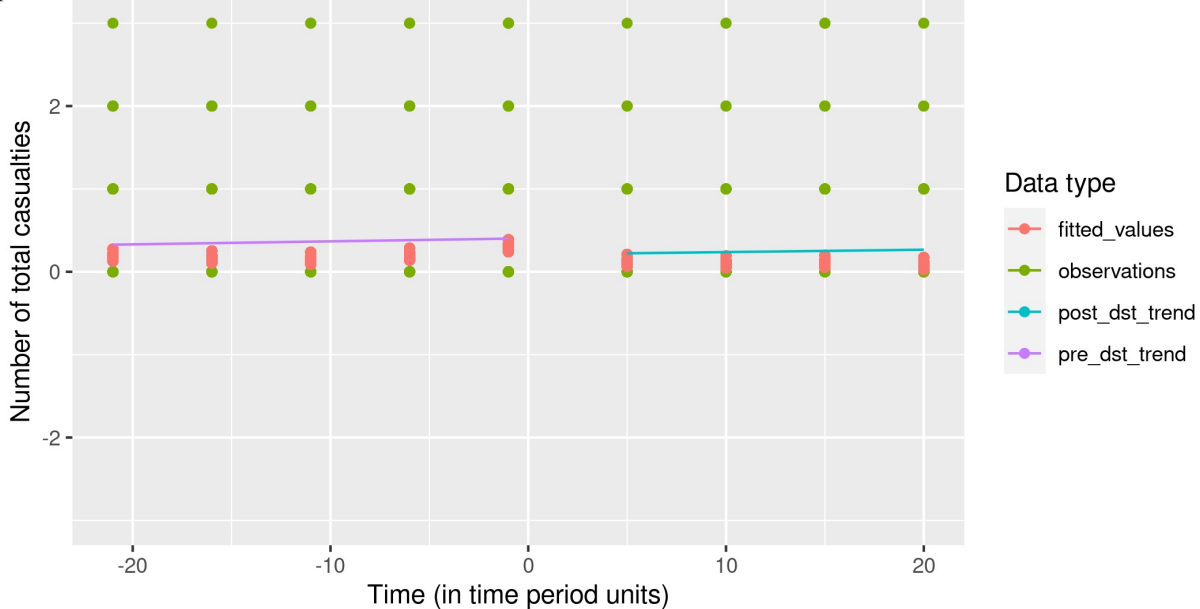

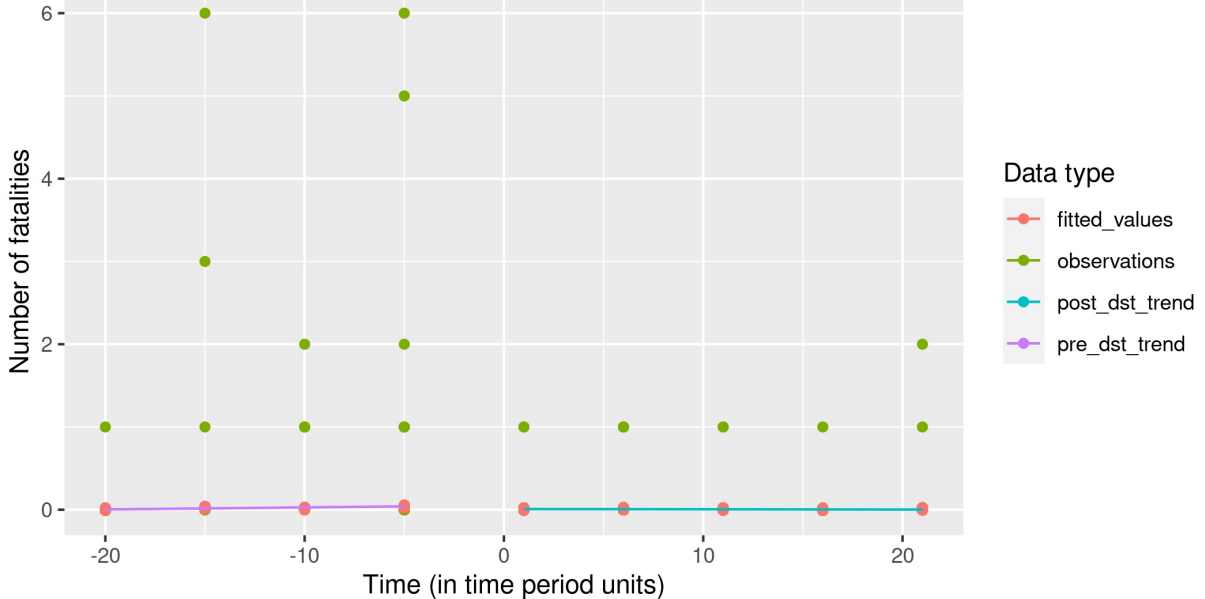

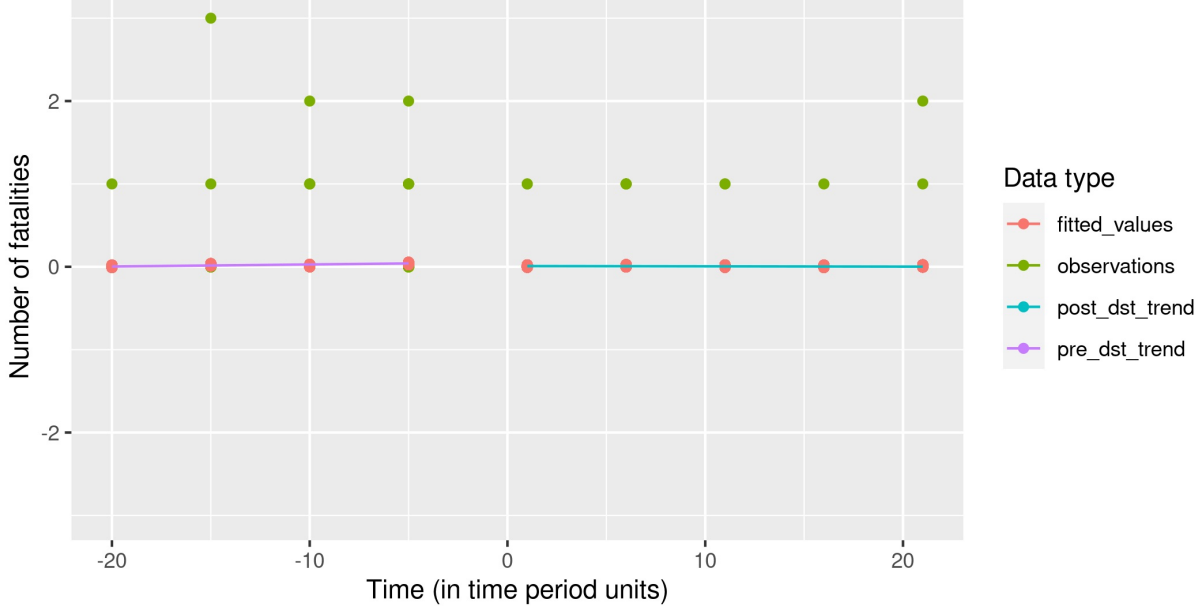

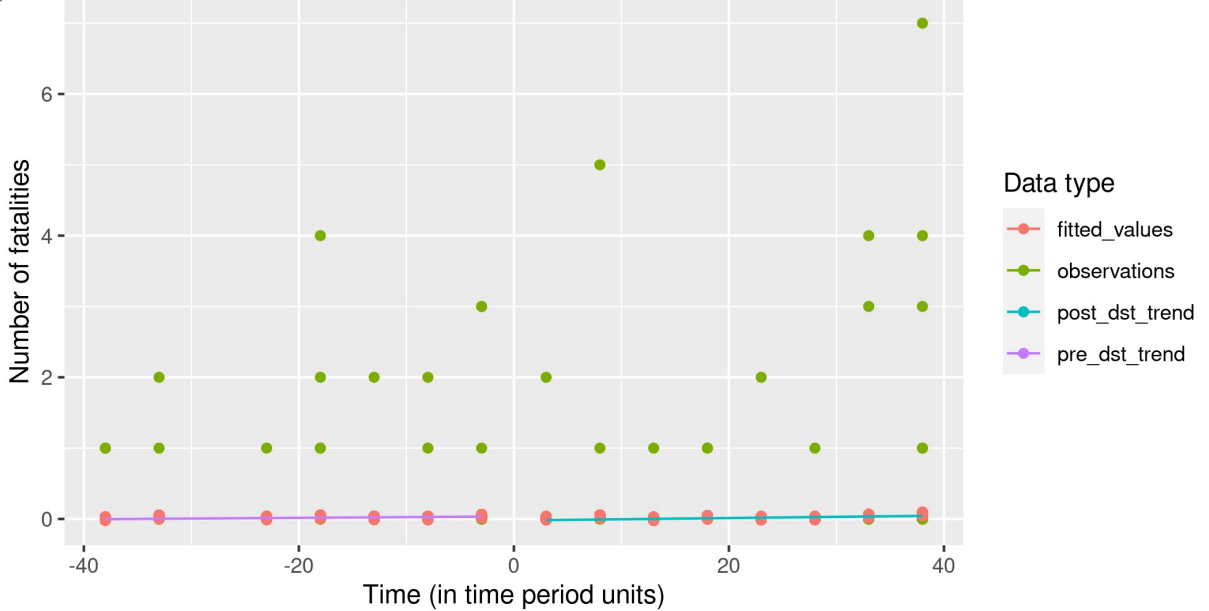

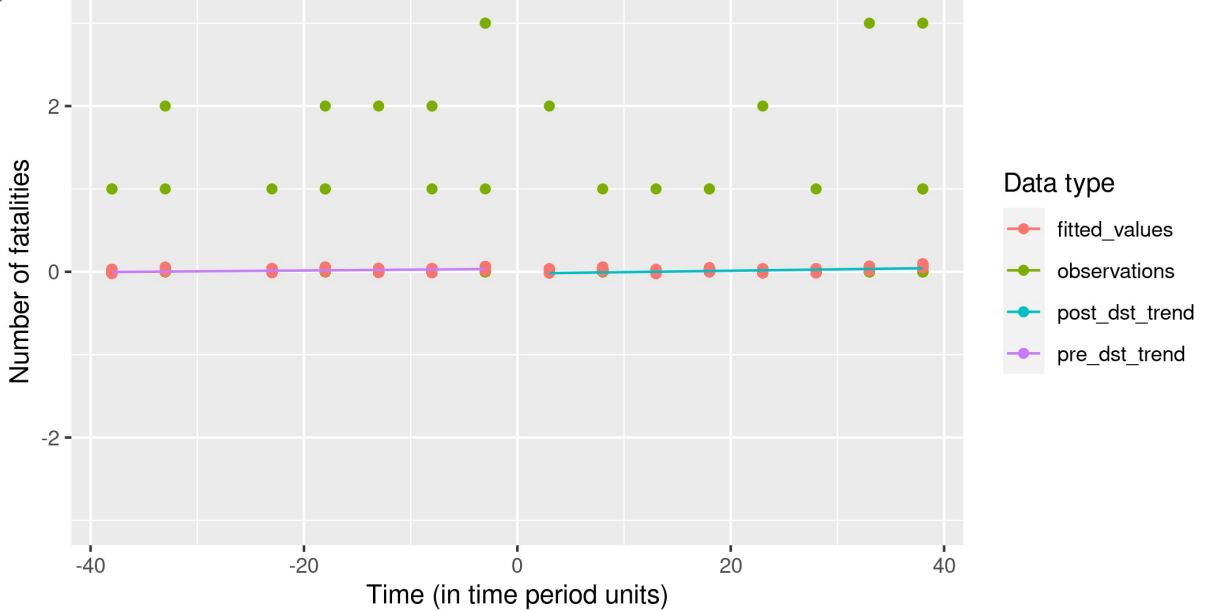



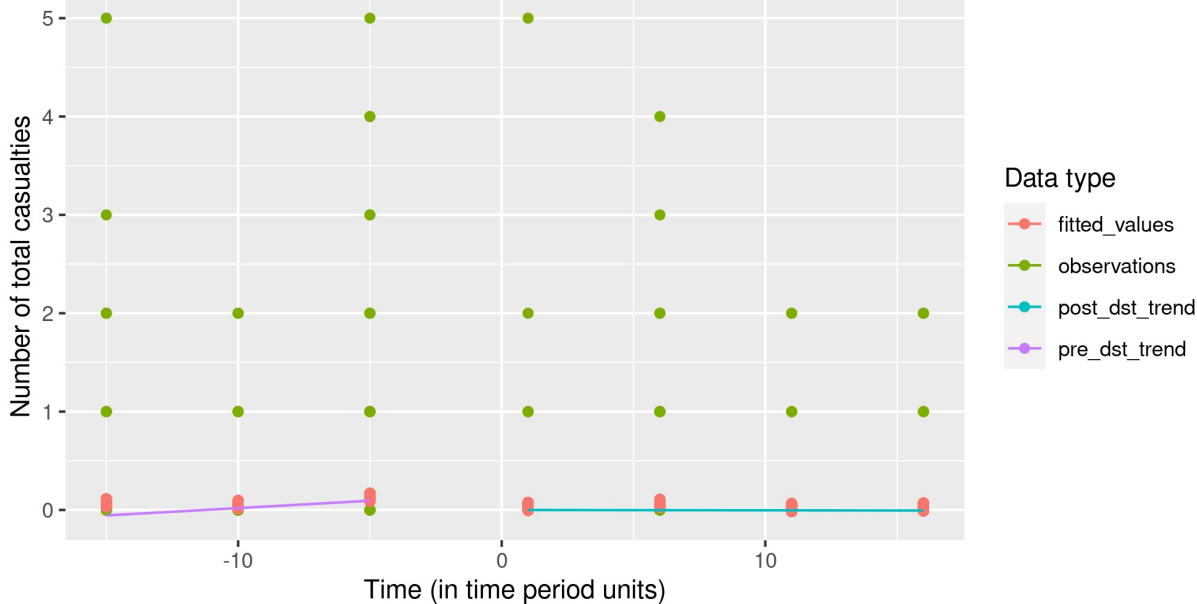

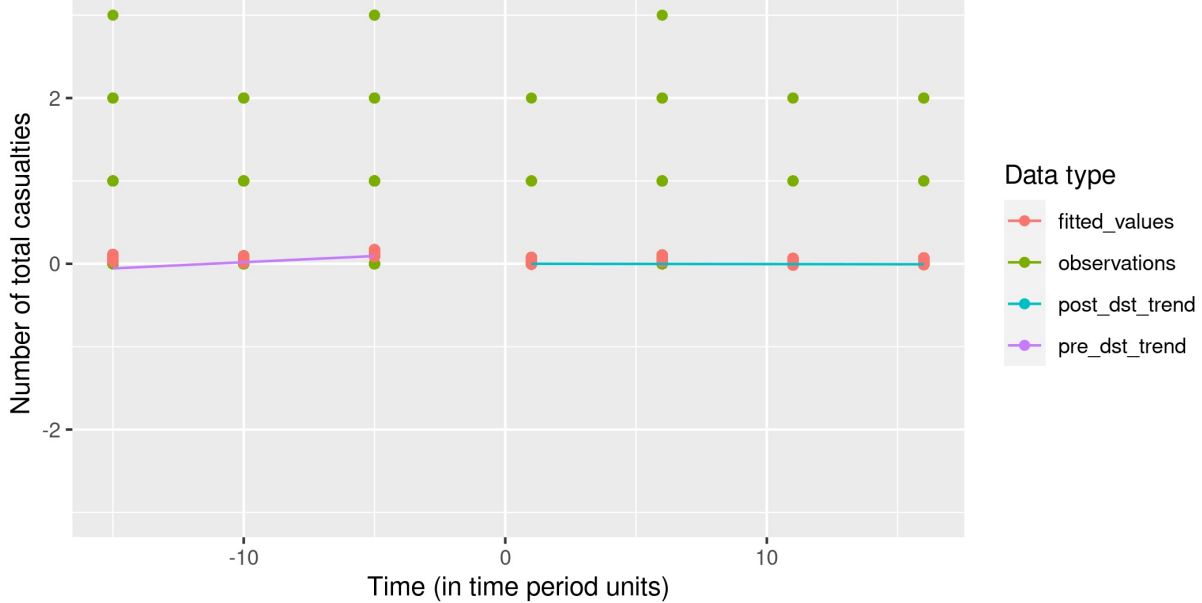

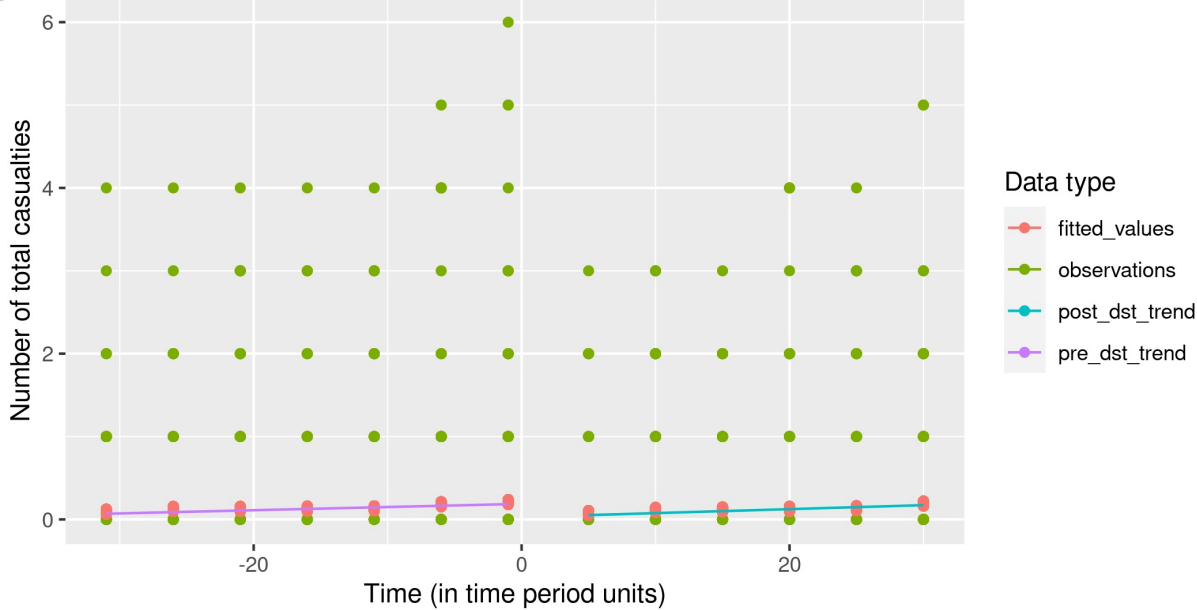

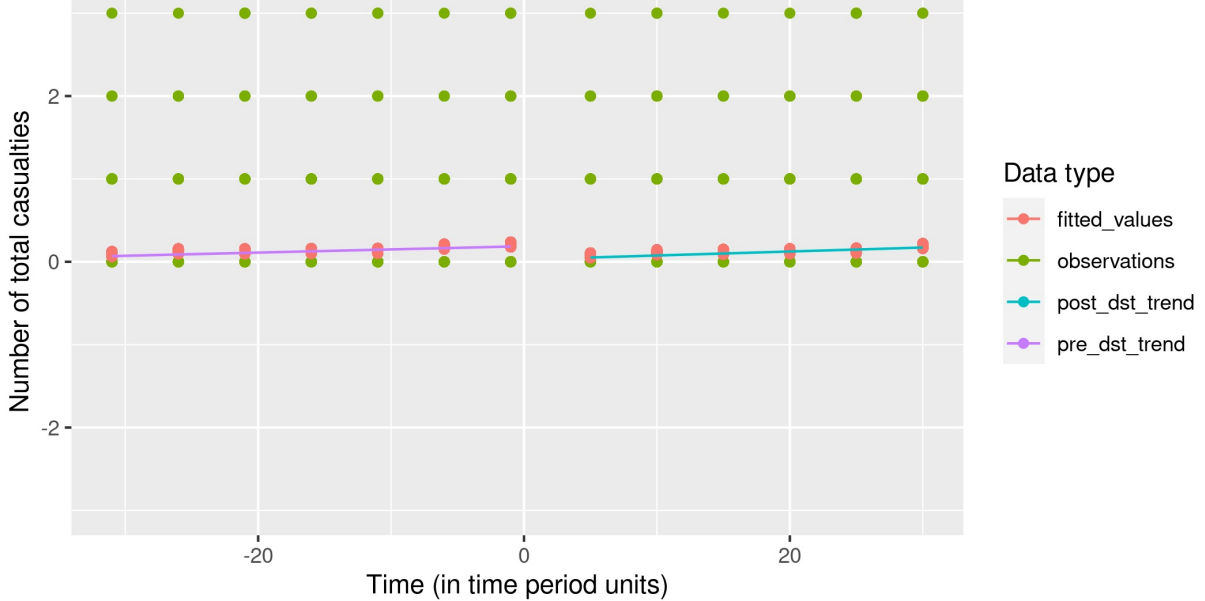

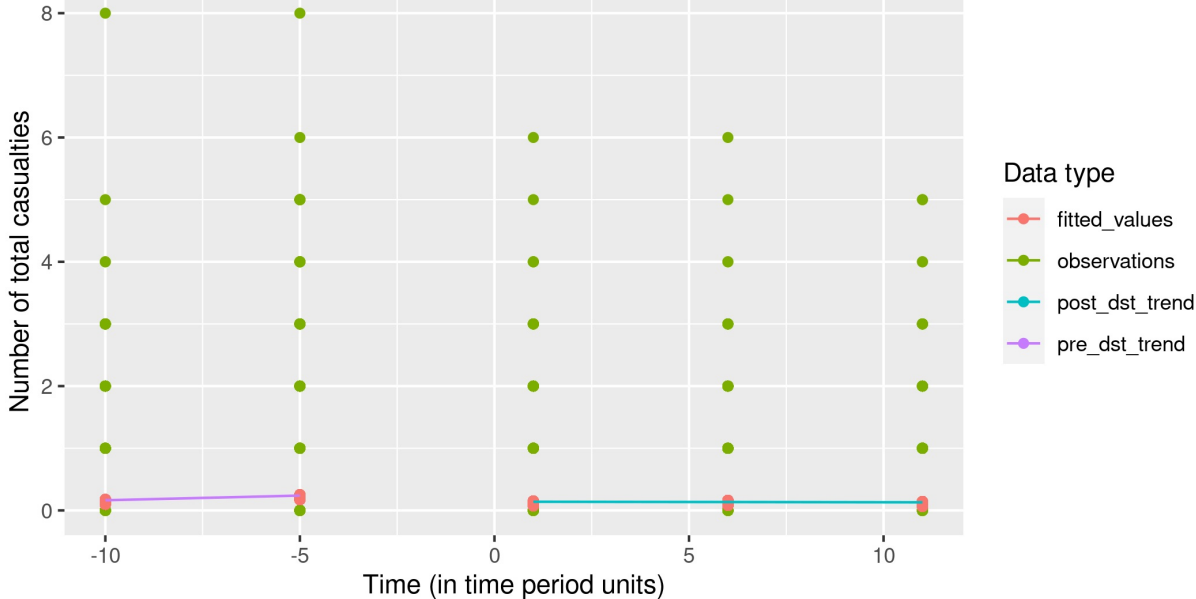

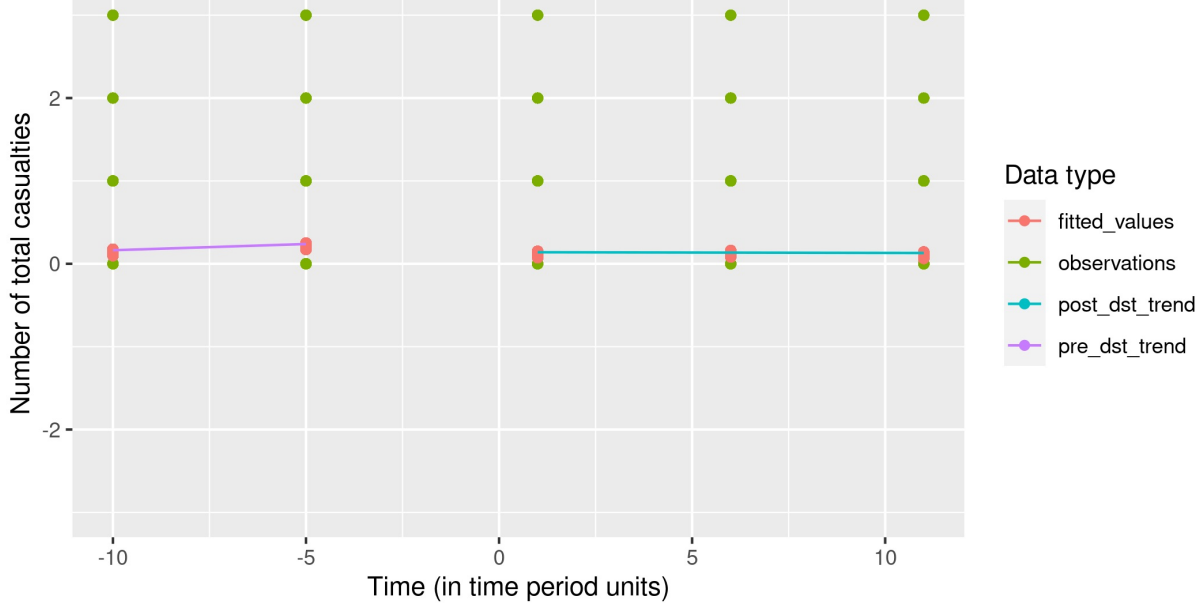

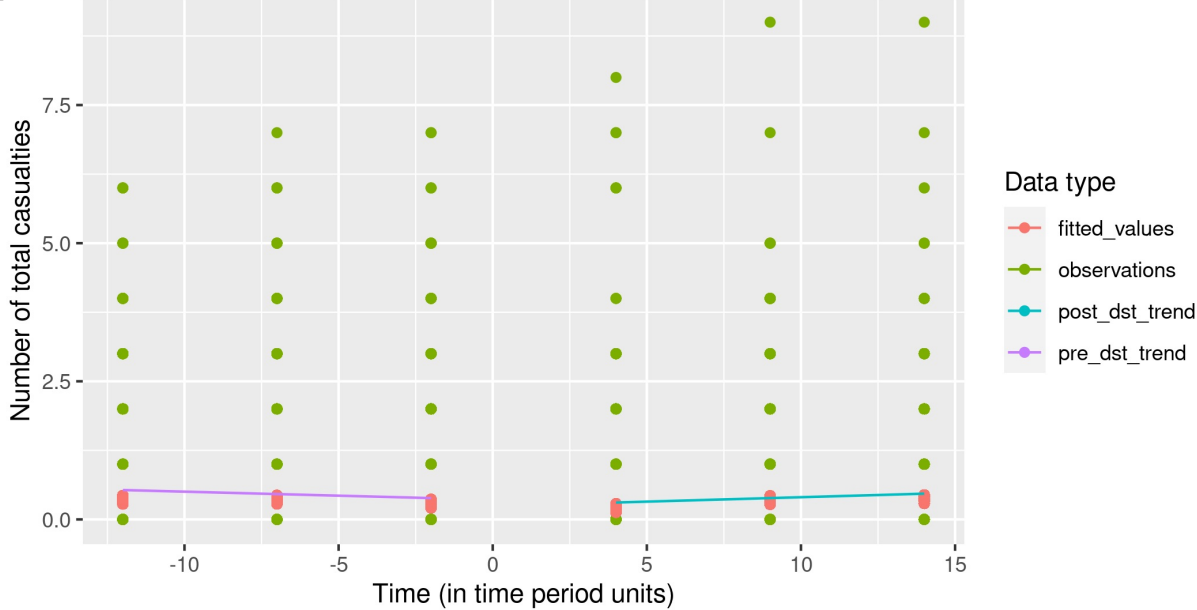

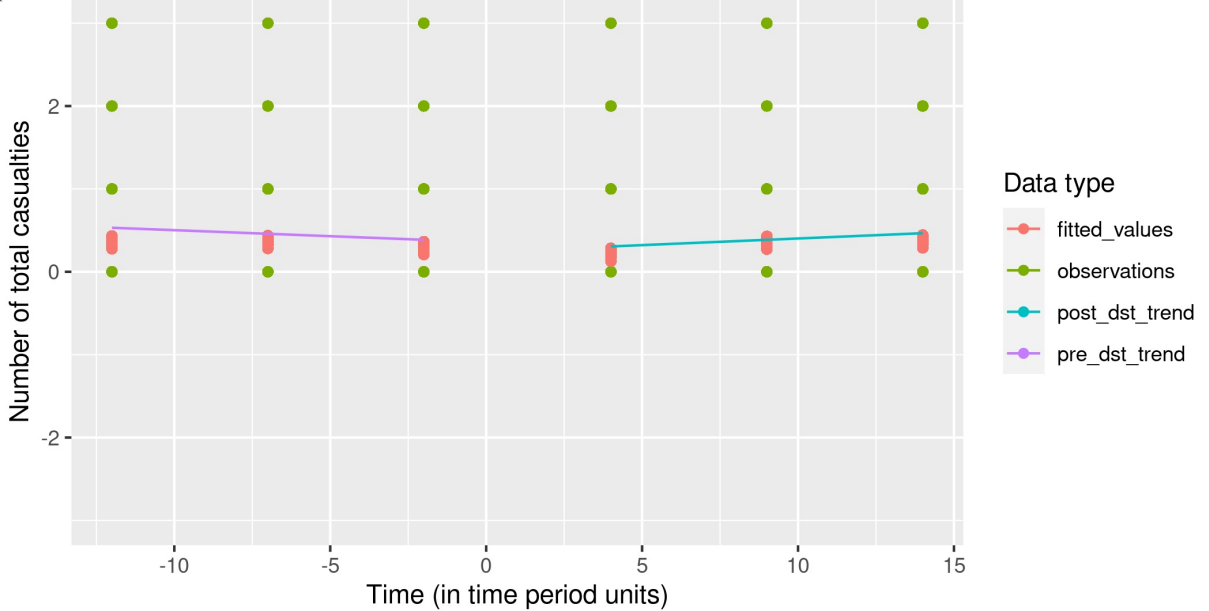



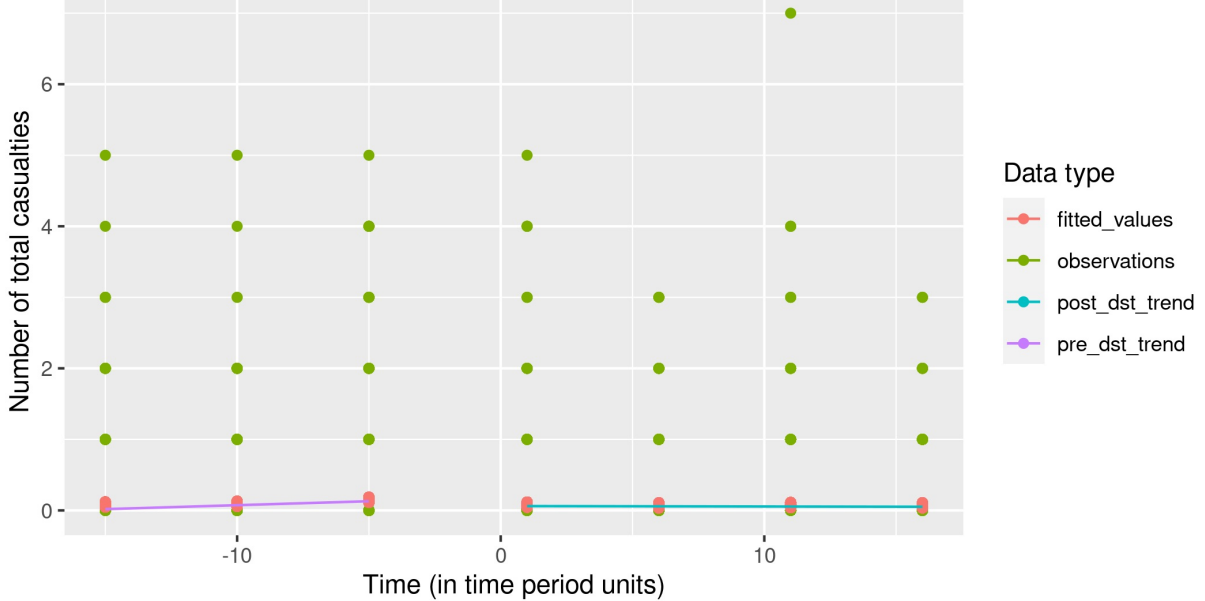

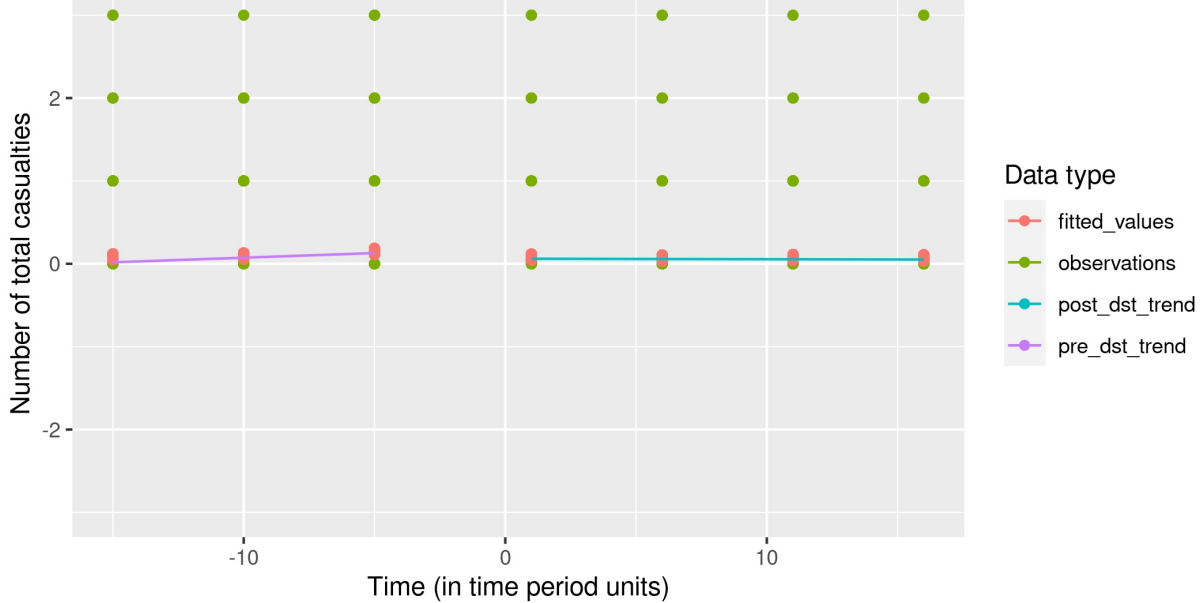

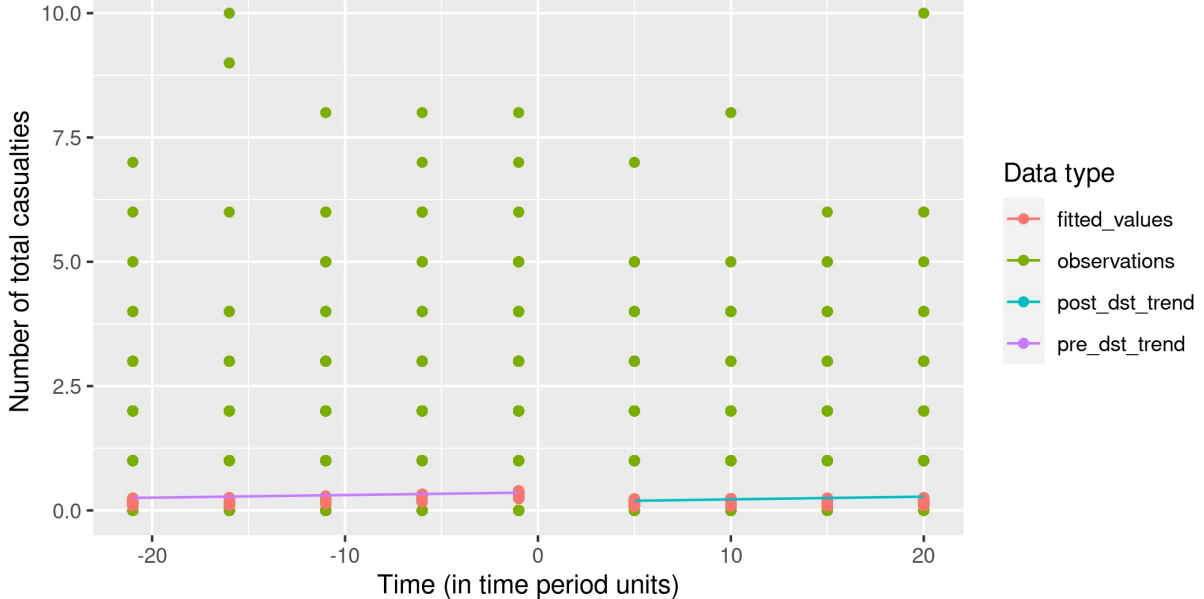

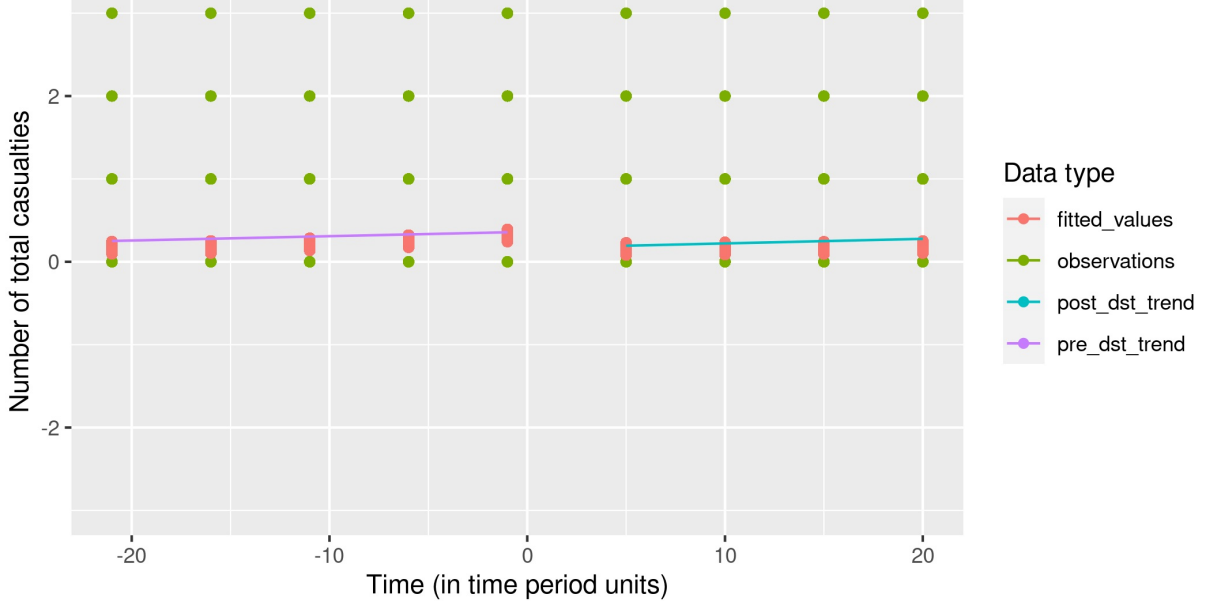

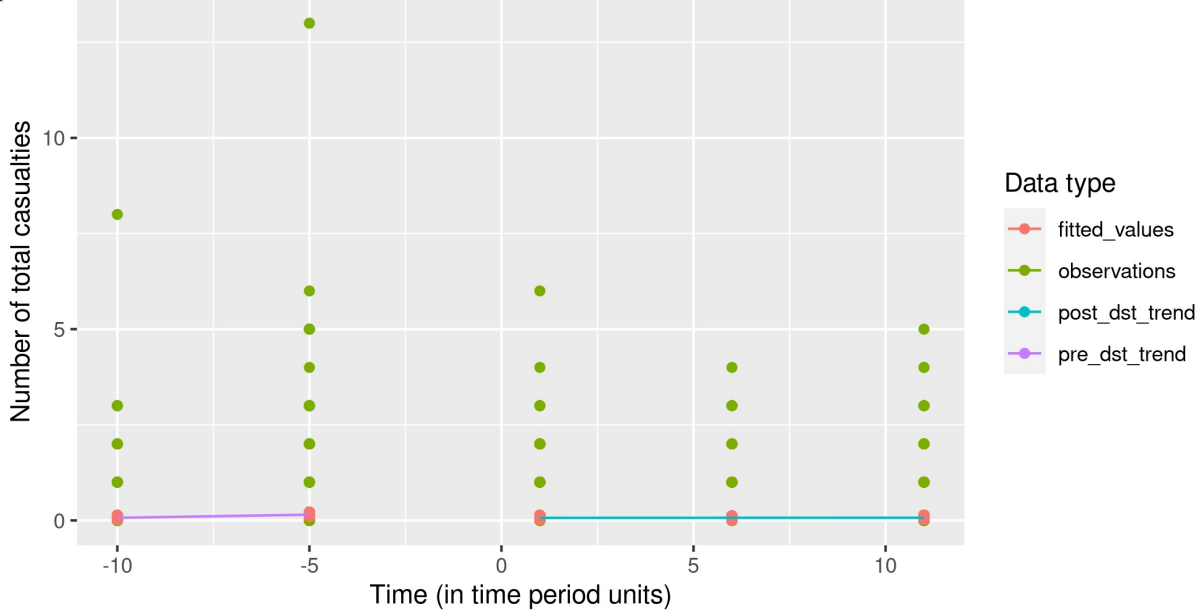

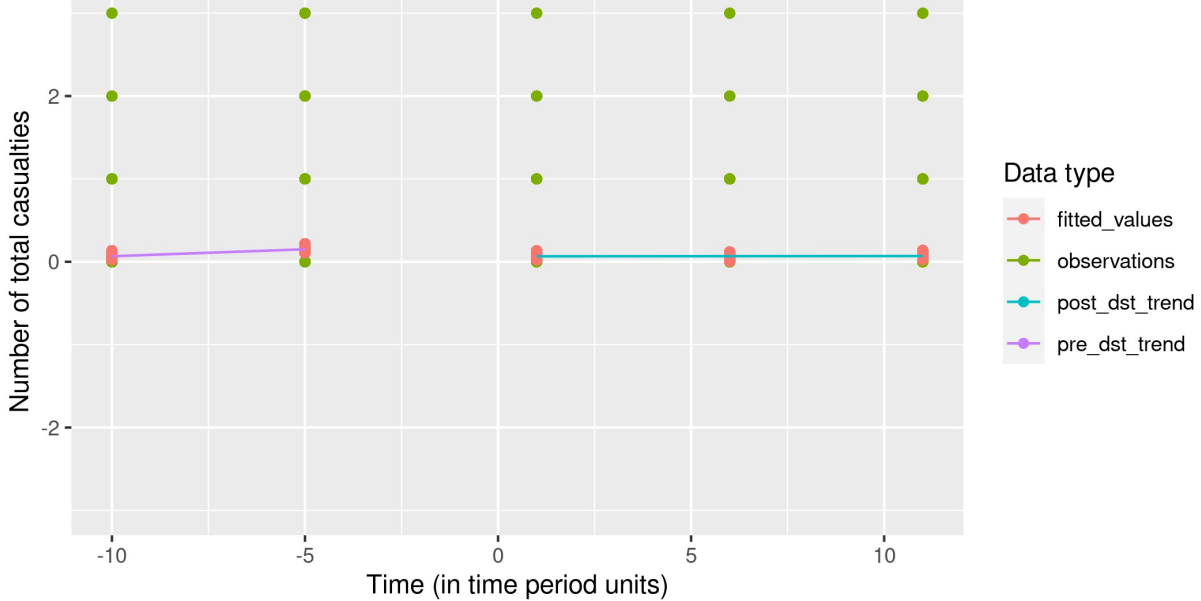

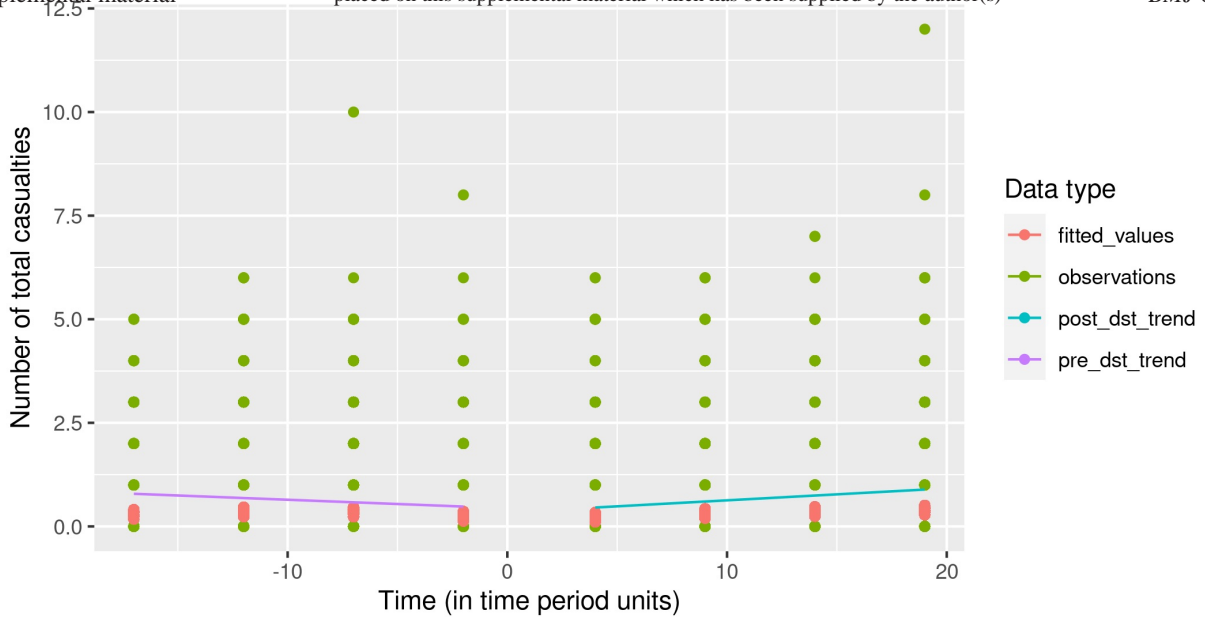

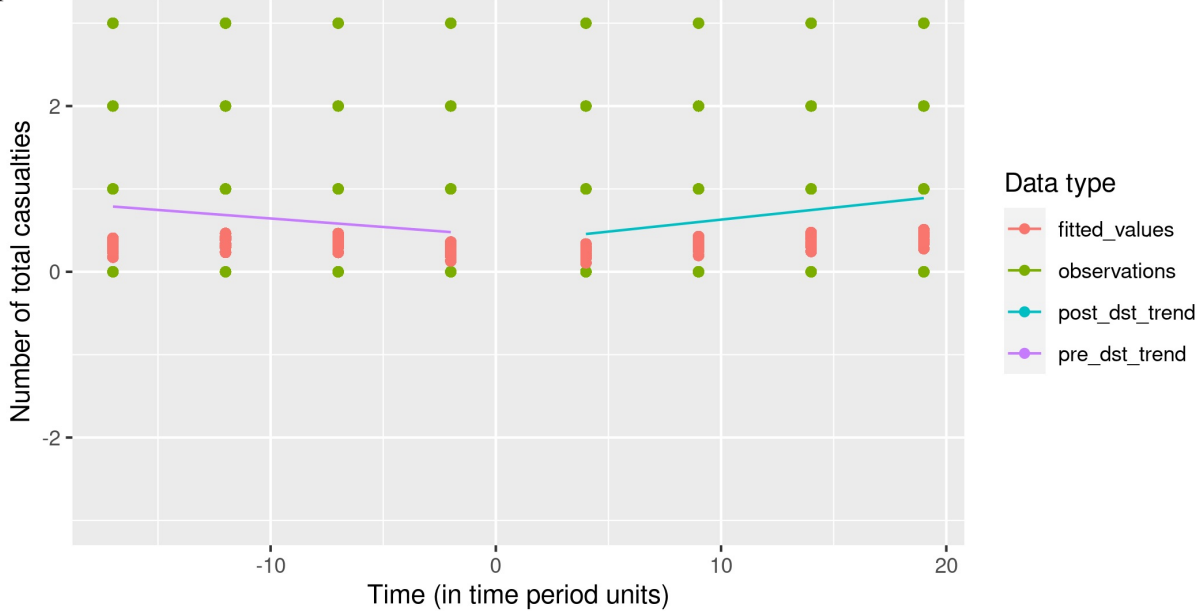



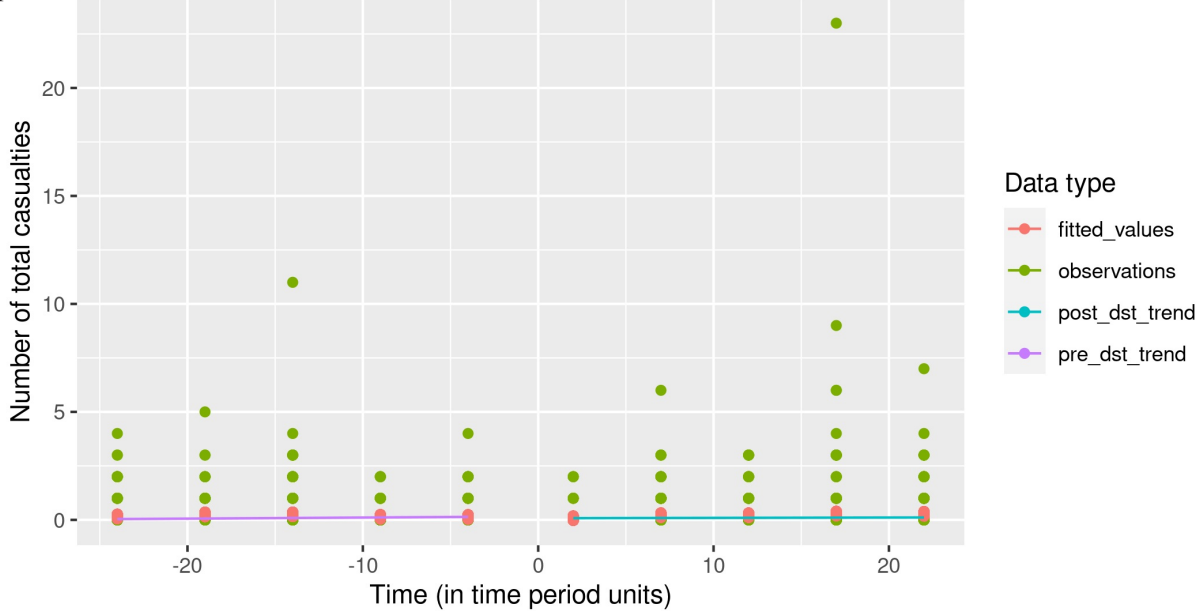

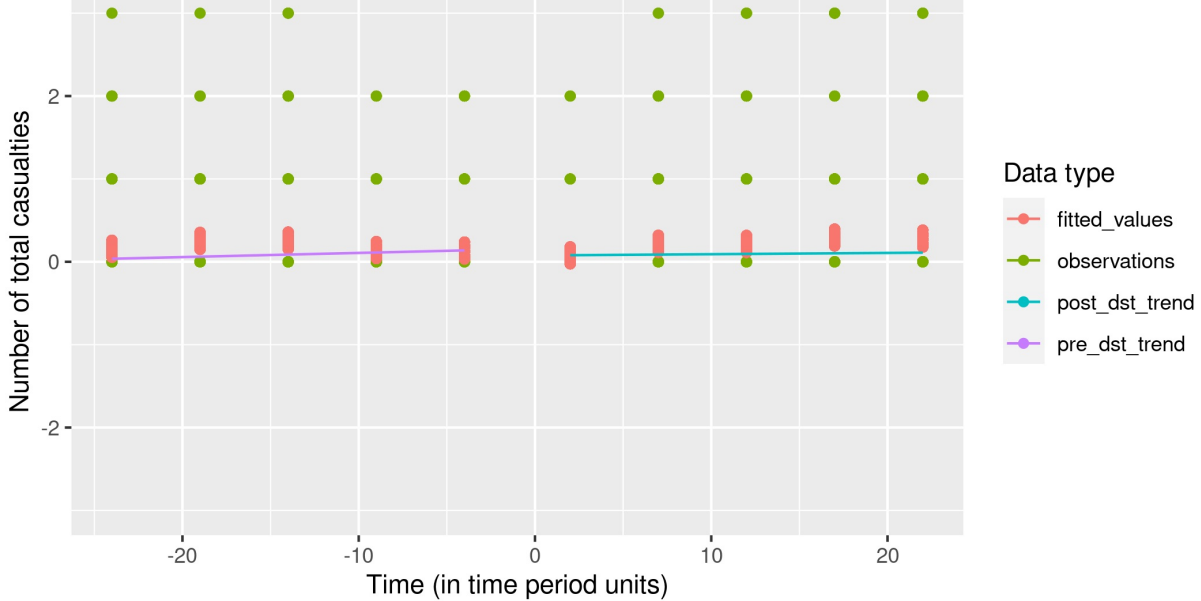

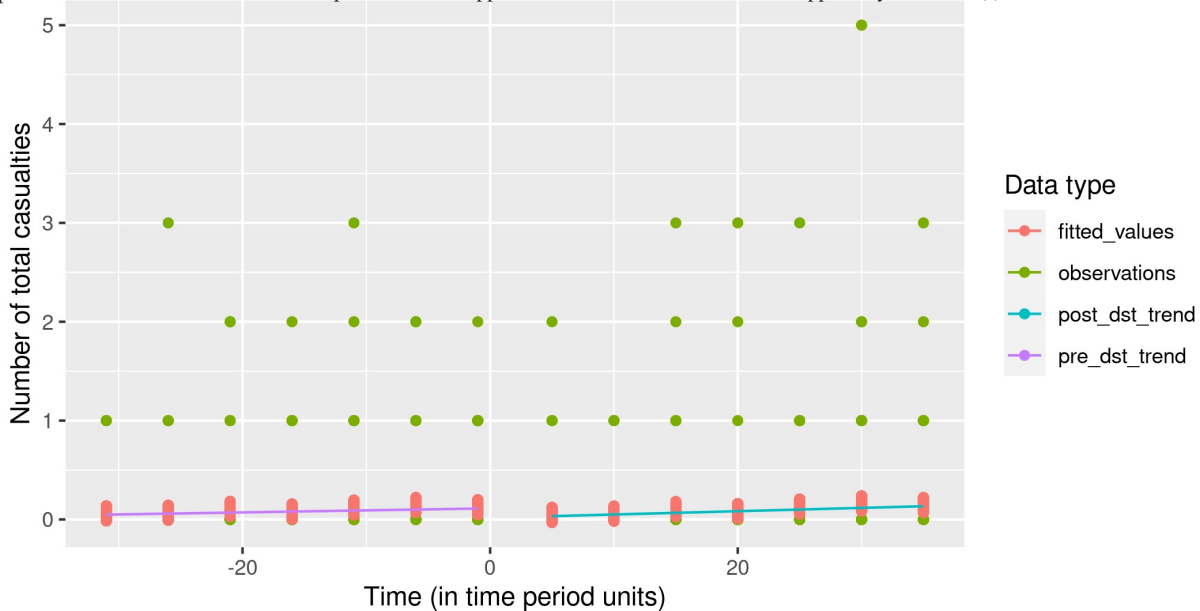

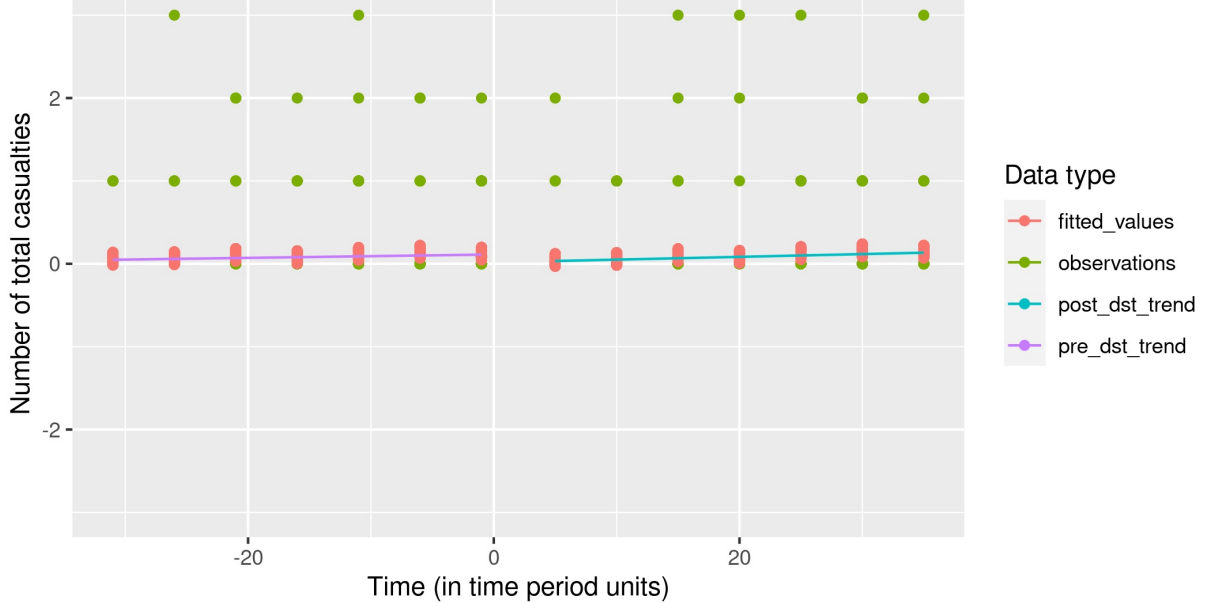

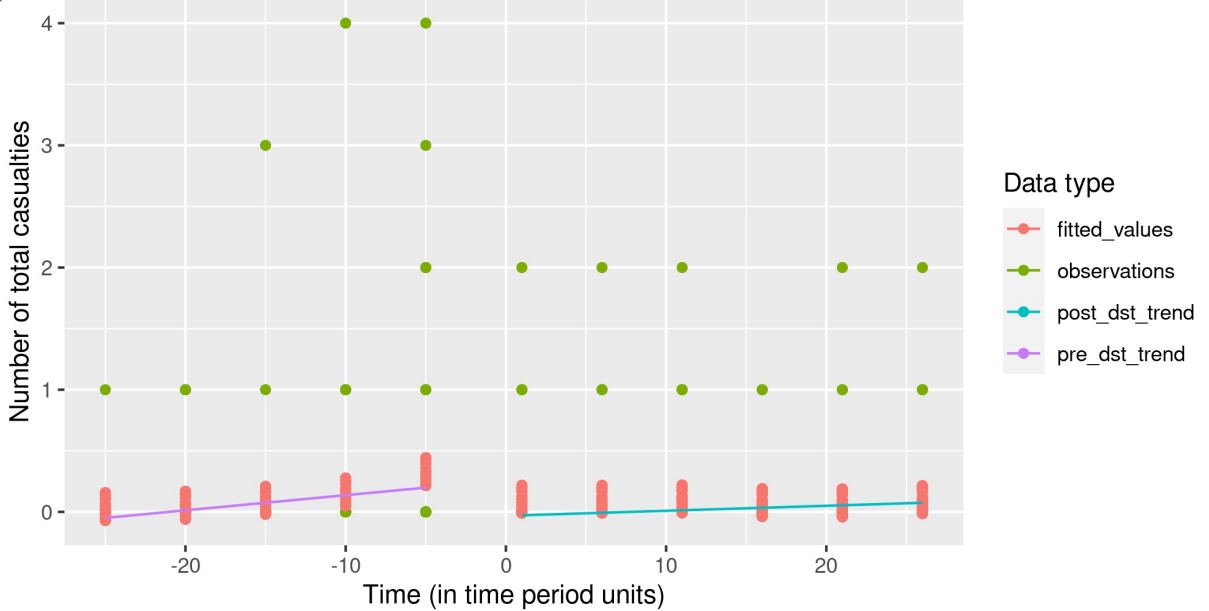

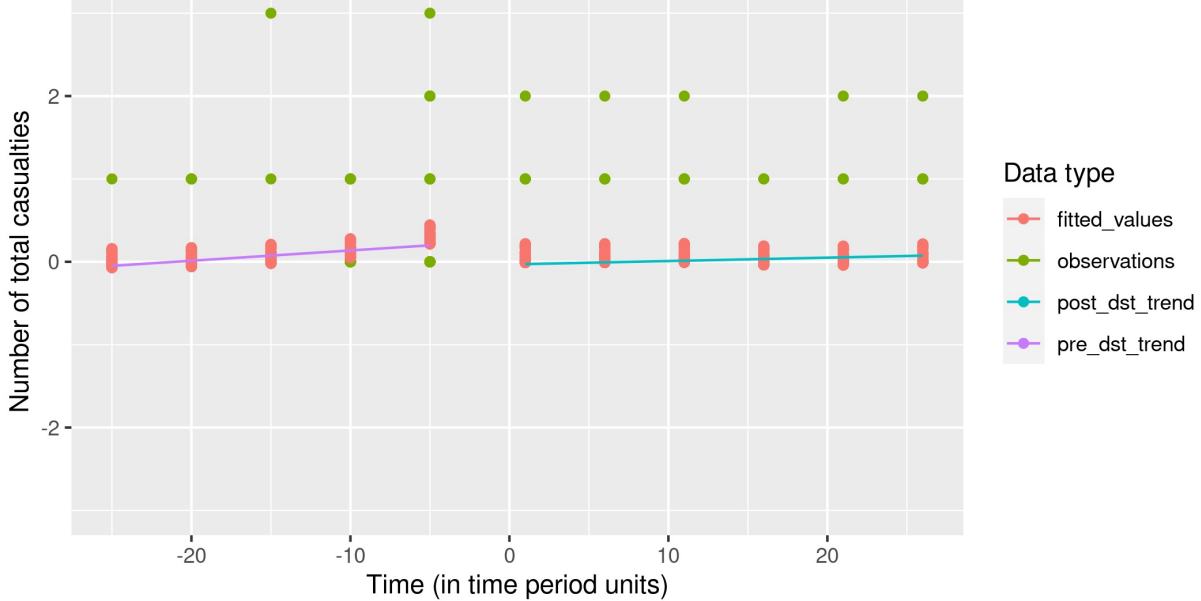

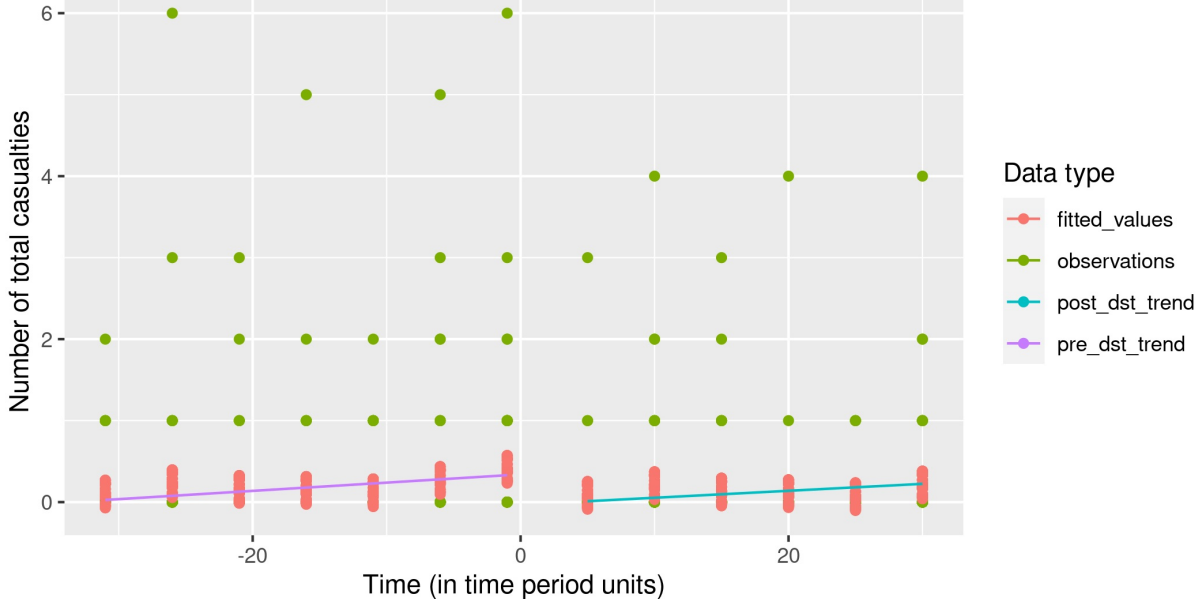

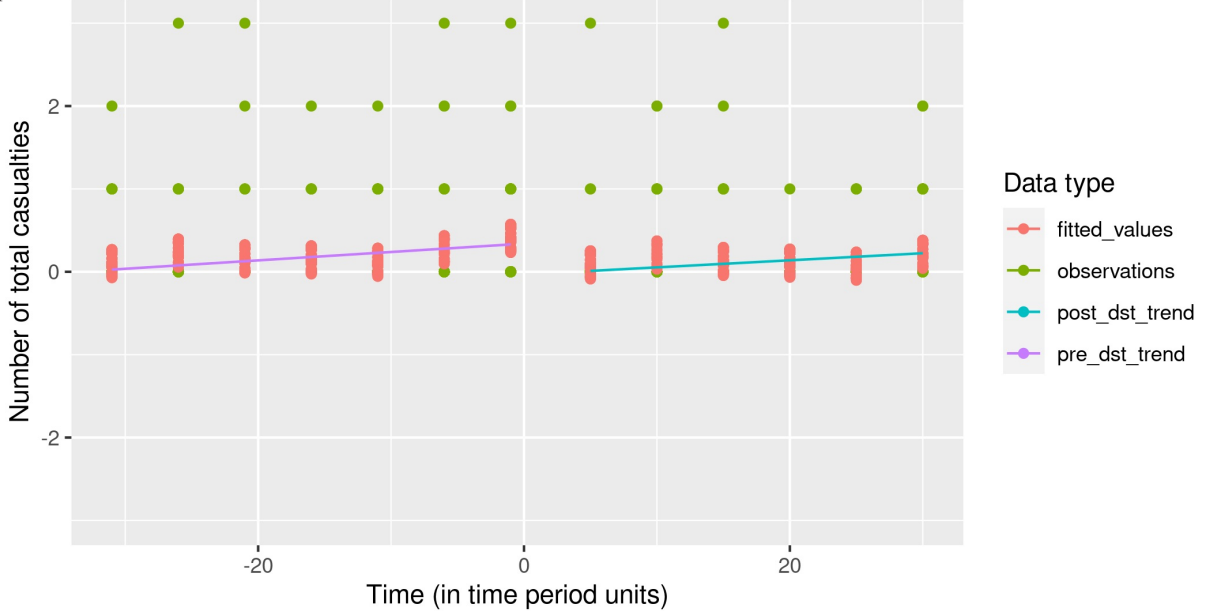



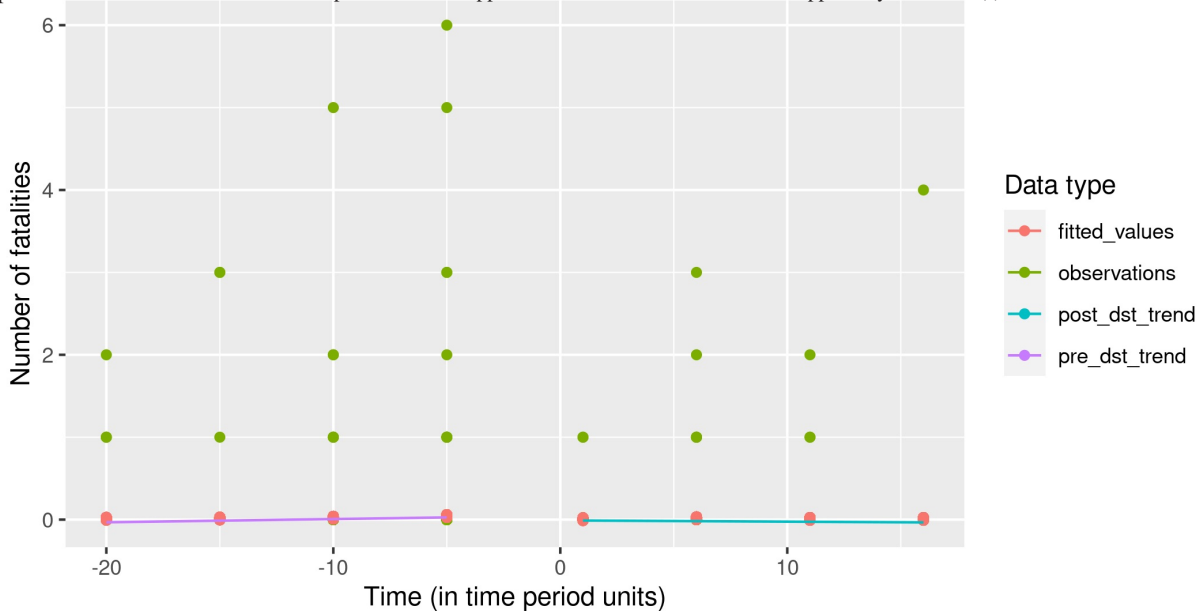

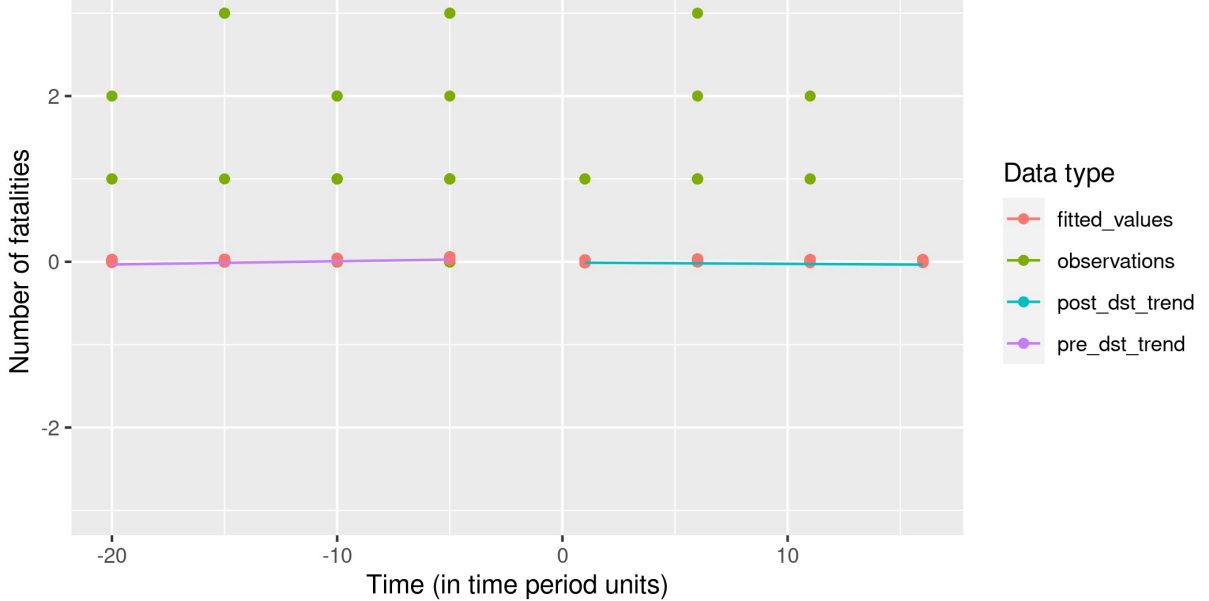

Supplement: bmjopen-2021-054678supp002.pdf [file bmjopen-2021-054678supp002.pdf]
